# Supplementary material for: Design and Synthesis of 1,3-Diarylpyrazoles and Investigation of Their Cytotoxicity and Antiparasitic Profile
Source: MDPI journal article supplement (doi:10.3390/ijms25094693), 2024-04-25

# Design and Synthesis of 1,3-Diarylpyrazoles and Investigation of Their Cytotoxicity and Antiparasitic Profile

Murat Bozdag <sup>1</sup>, Freke Mertens <sup>2</sup>, An Matheeussen <sup>3</sup>, Natascha Van Pelt <sup>3</sup>, Kenn Foubert <sup>4</sup>, Nina Hermans <sup>4</sup>, Guido R. Y. De Meyer <sup>2</sup>, Koen Augustyns <sup>1</sup>, Wim Martinet <sup>2</sup>, Guy Caljon <sup>3</sup> and Pieter Van der Veken <sup>1,\*</sup>

1 Laboratory of Medicinal Chemistry, Department of Pharmaceutical Sciences, Infla-Med Centre of Excellence, University of Antwerp, Universiteitsplein 1, 2610 Wilrijk-Antwerp, Belgium; koen.augustyns@uantwerpen.be (K.A.)

2 Laboratory of Physiopharmacology, Department of Pharmaceutical Sciences, Infla-Med Centre of Excellence, University of Antwerp, Universiteitsplein 1, 2610 Wilrijk-Antwerp, Belgium; freke.mertens@uantwerpen.be (F.M.); guido.demeyer@uantwerpen.be (G.R.Y.D.M.); wim.martinet@uantwerpen.be (W.M.)

3 Laboratory of Microbiology, Parasitology and Hygiene, Department of Biomedical Sciences, Infla-Med Centre of Excellence, University of Antwerp, Universiteitsplein 1, 2610 Wilrijk-Antwerp, Belgium; an.matheeussen@uantwerpen.be (A.M.); natascha.vanpelt@uantwerpen.be (N.V.P.); guy.caljon@uantwerpen.be (G.C.)

4 Natural Products and Food Research and Analysis–Pharmaceutical Technology, Department of Pharmaceutical Sciences, University of Antwerp, Universiteitsplein 1, 2610 Wilrijk-Antwerp, Belgium; kenn.foubert@uantwerpen.be (K.F.); nina.hermans@uantwerpen.be (N.H.)

\* Correspondence: pieter.vanderveken@uantwerpen.be

## Table of Contents:

|                                                                           |         |
|---------------------------------------------------------------------------|---------|
| 1) <sup>1</sup> H and <sup>13</sup> C-NMR spectra of compounds 13–69..... | 2–115   |
| 2) UPLC and HRMS spectra of the studied samples.....                      | 116–147 |

# 1. $^1\text{H}$ and $^{13}\text{C}$ -NMR spectra of compounds 13–69

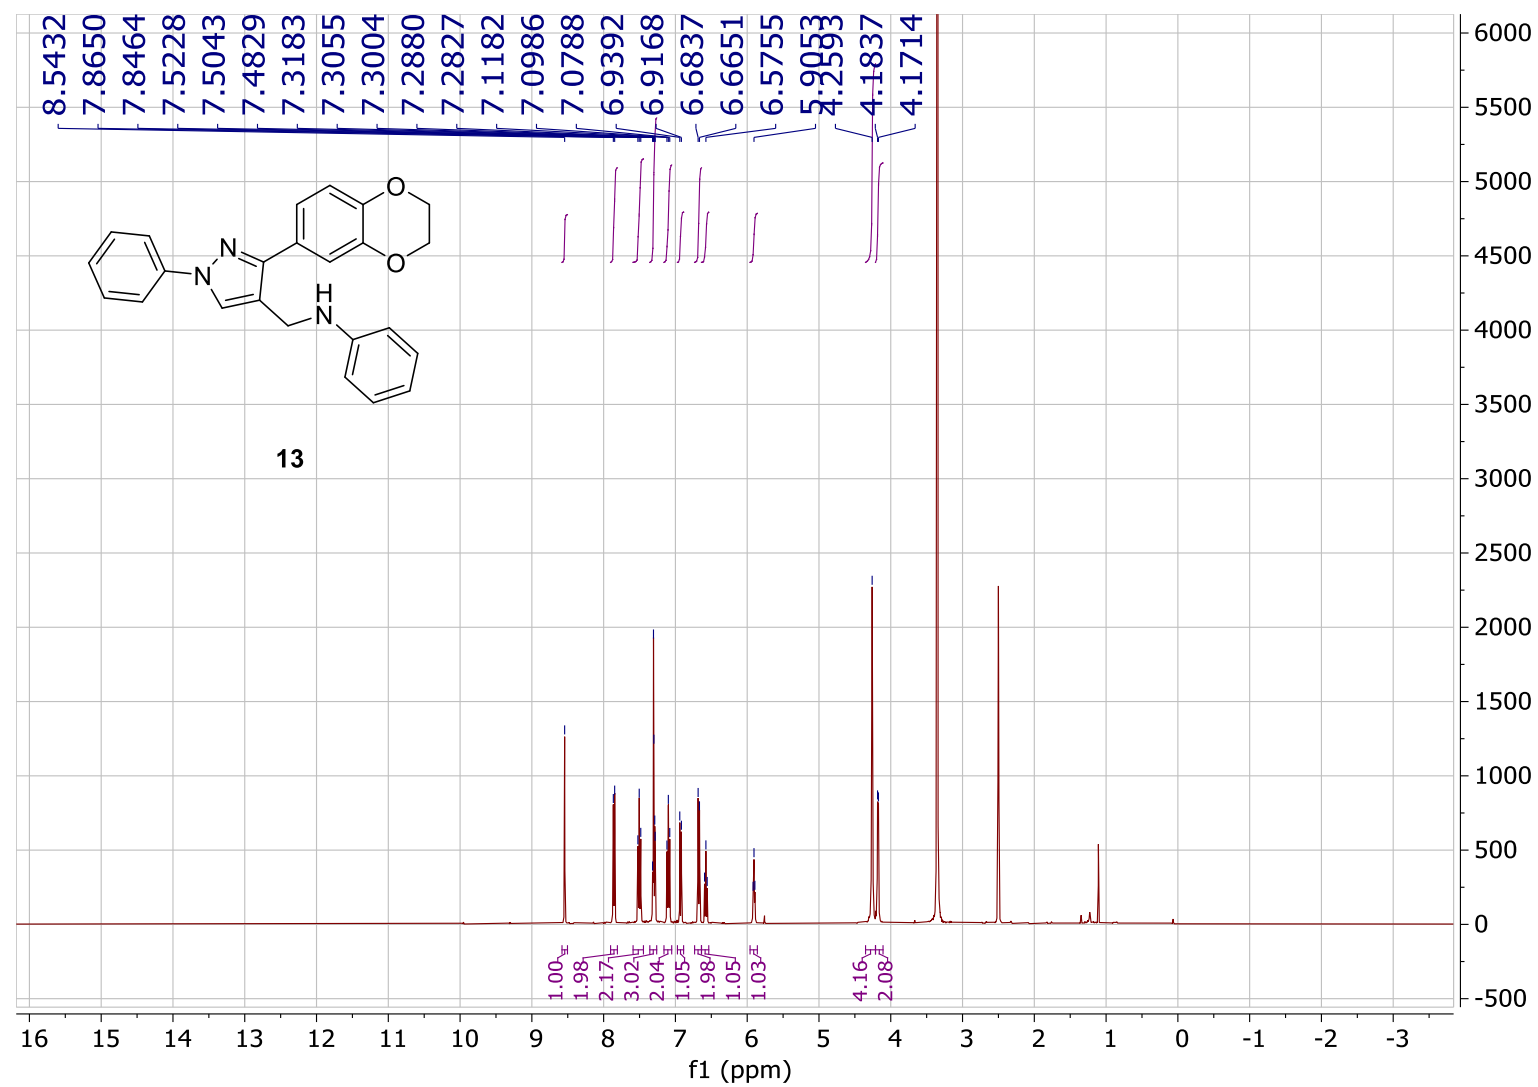

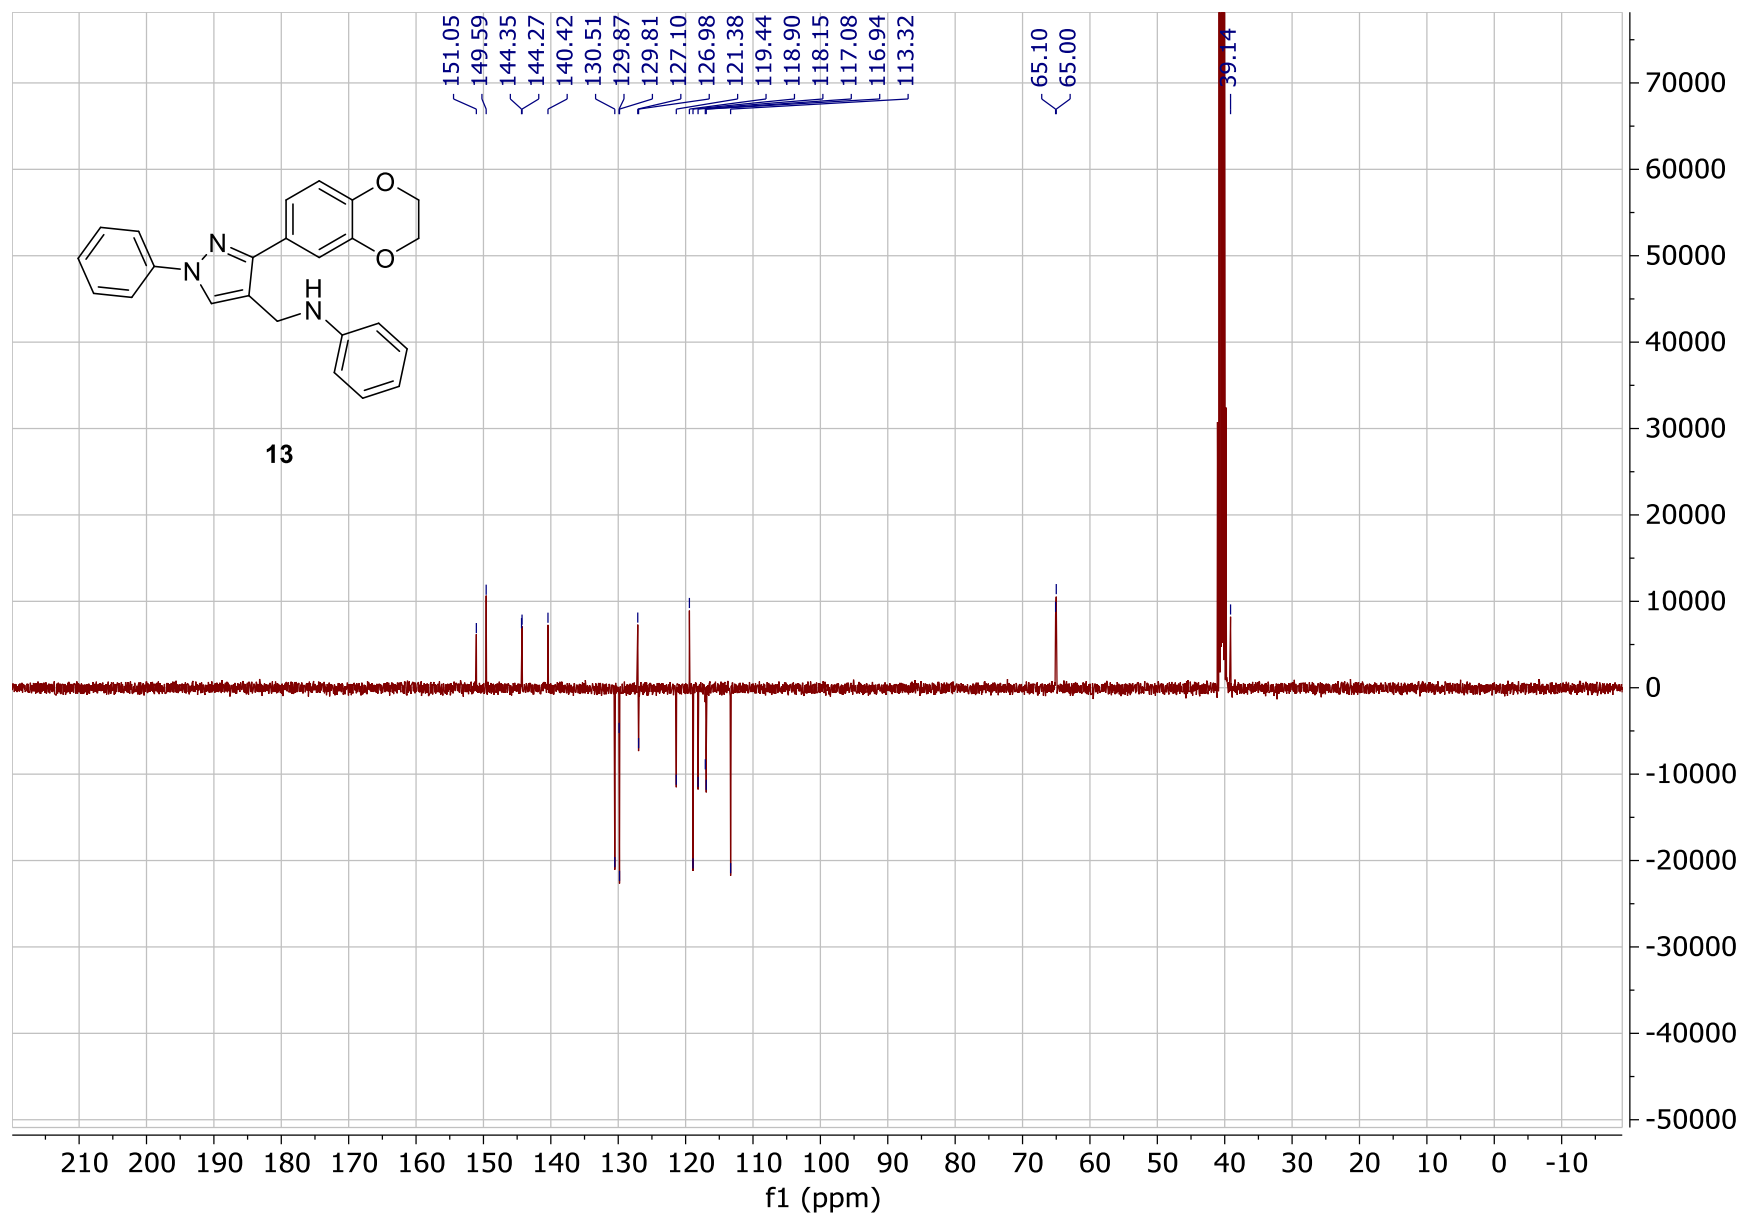

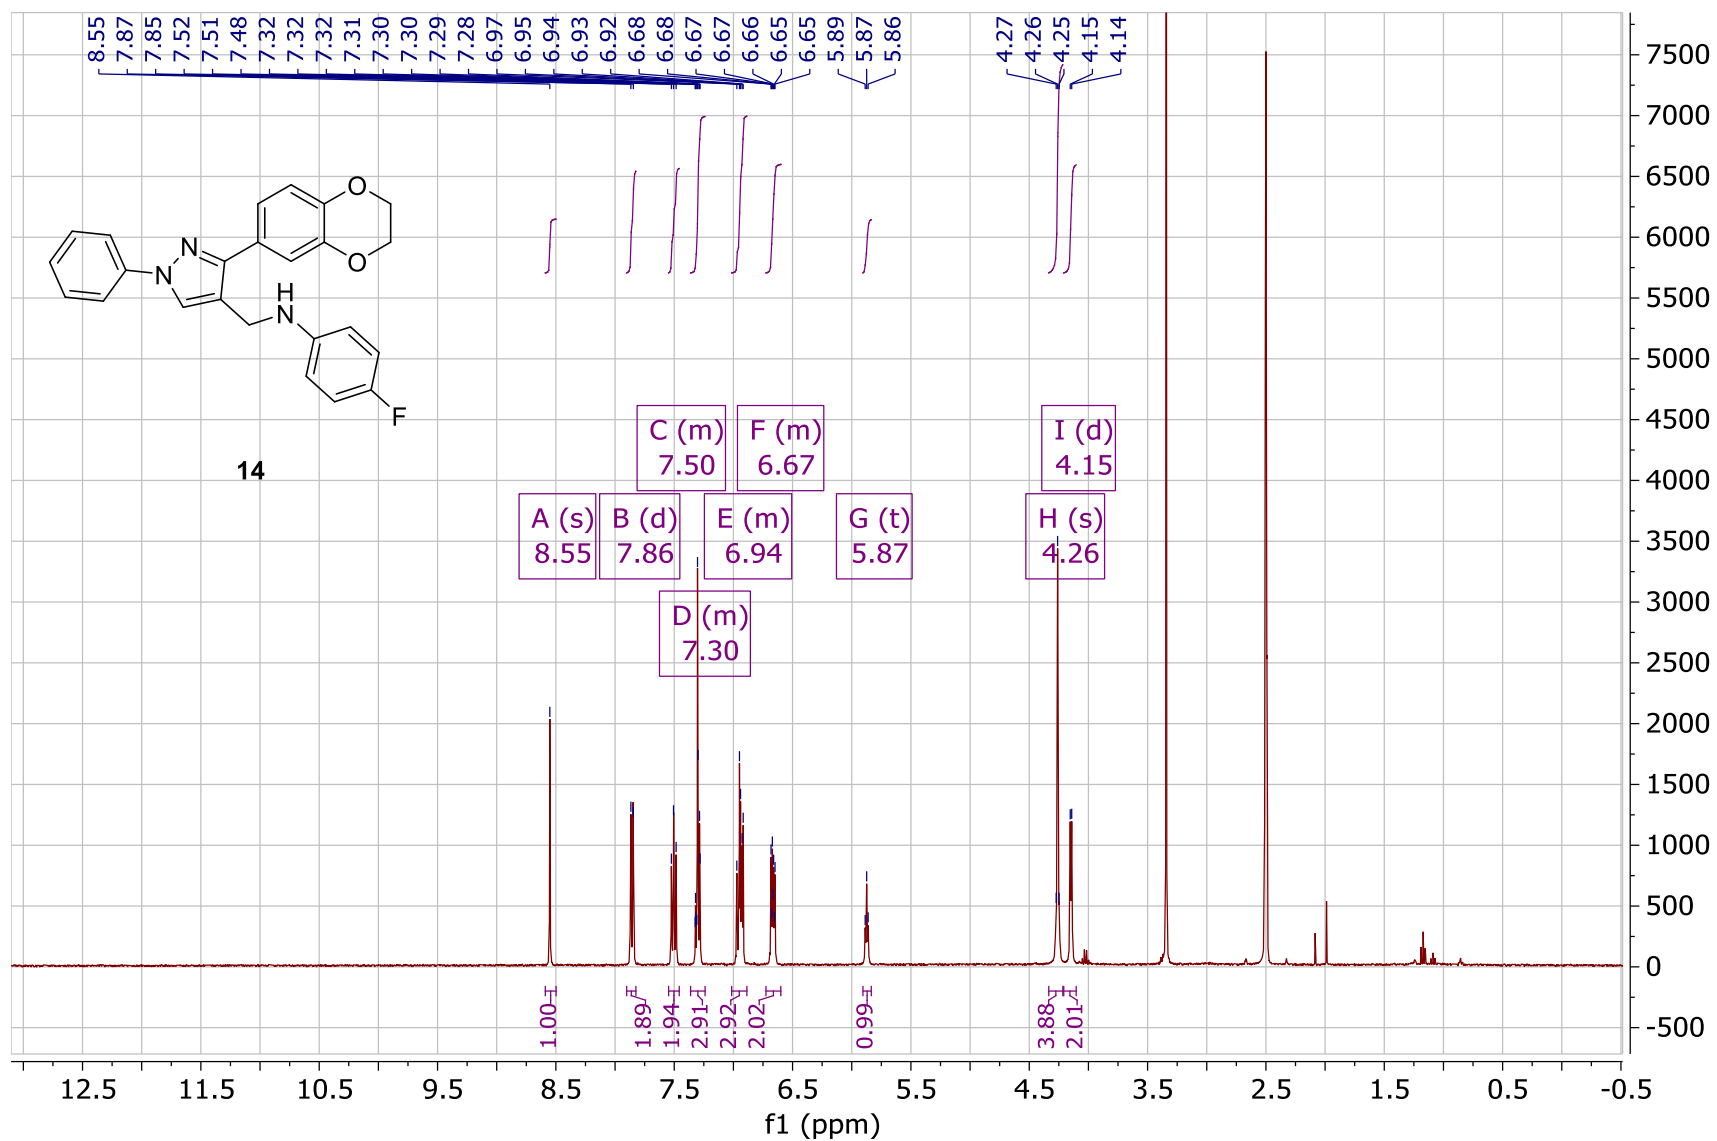



MB-2022-067B.31.fid

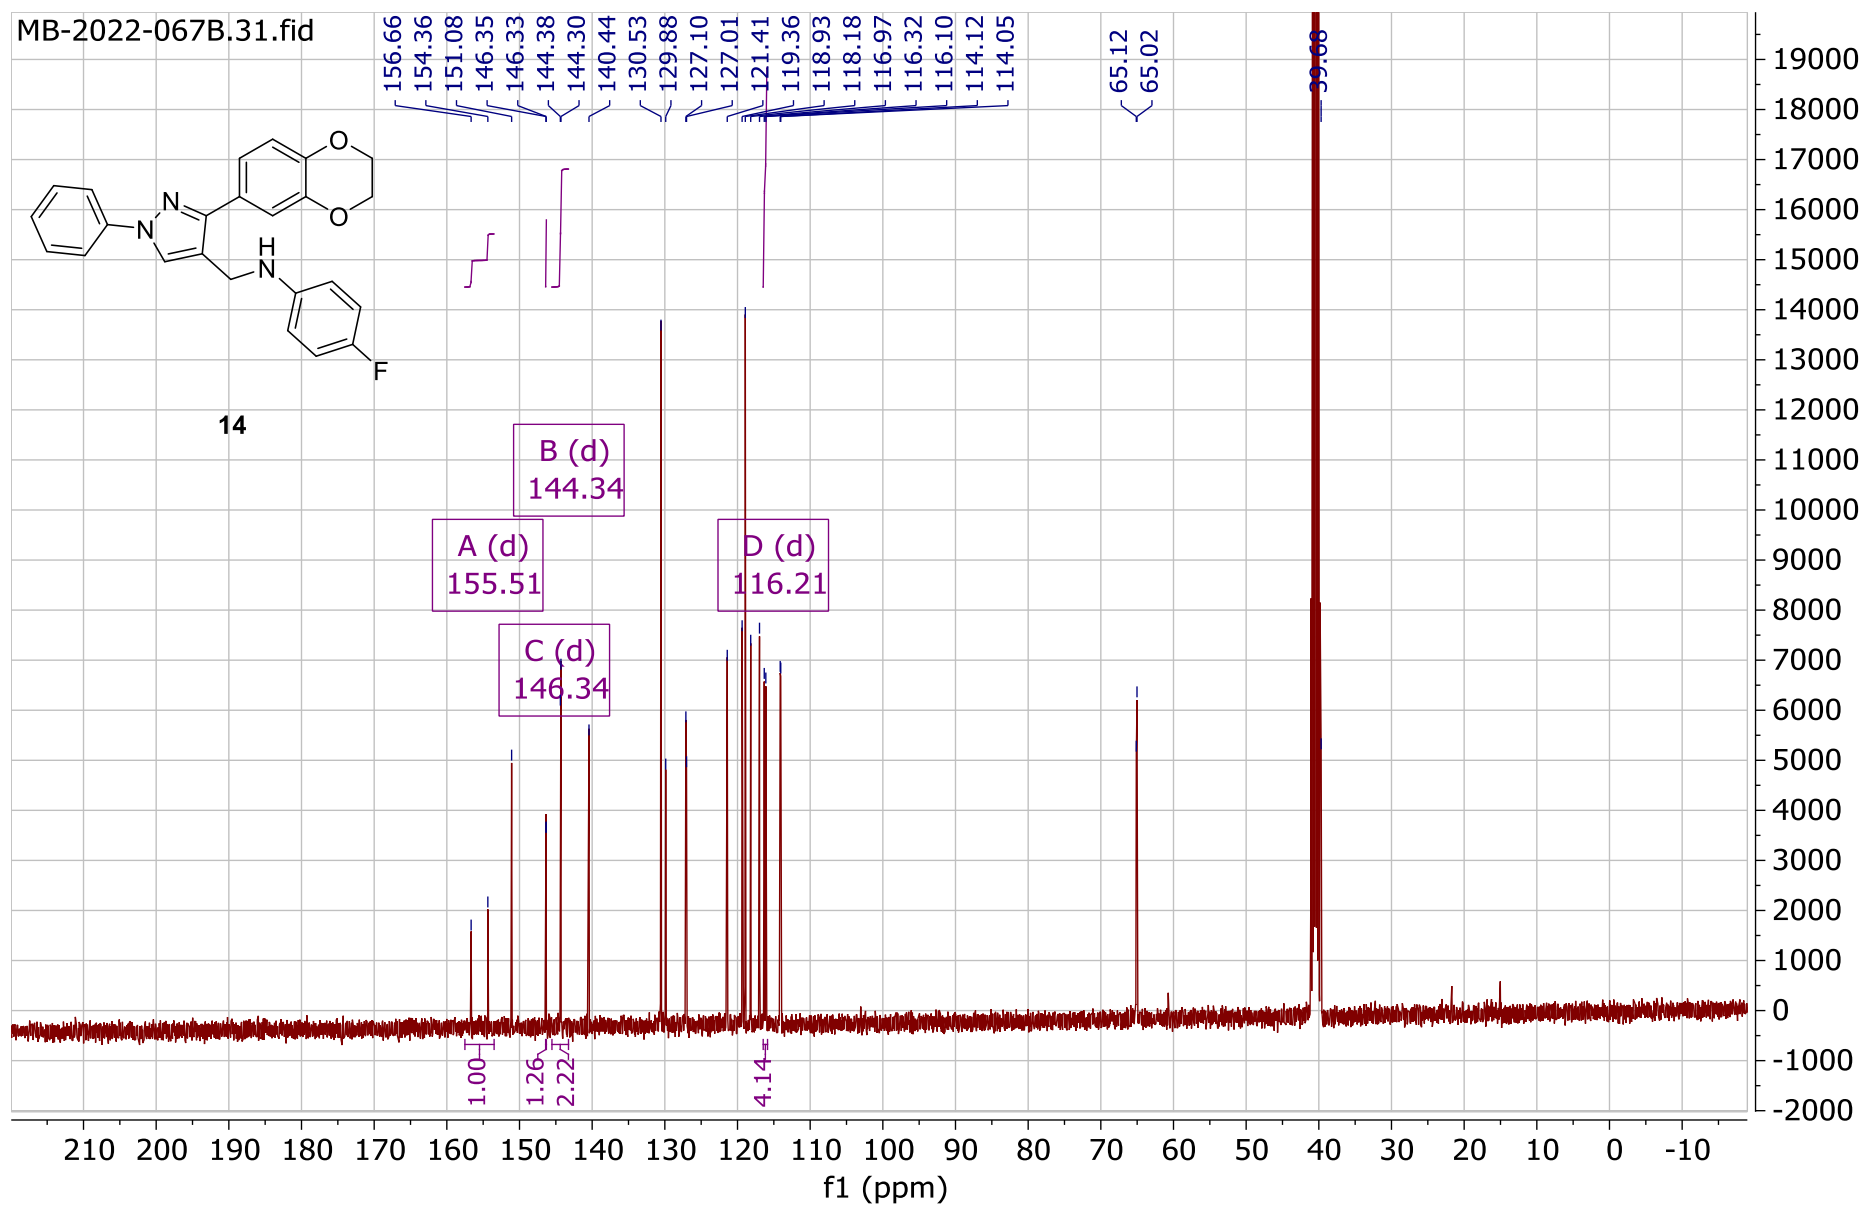

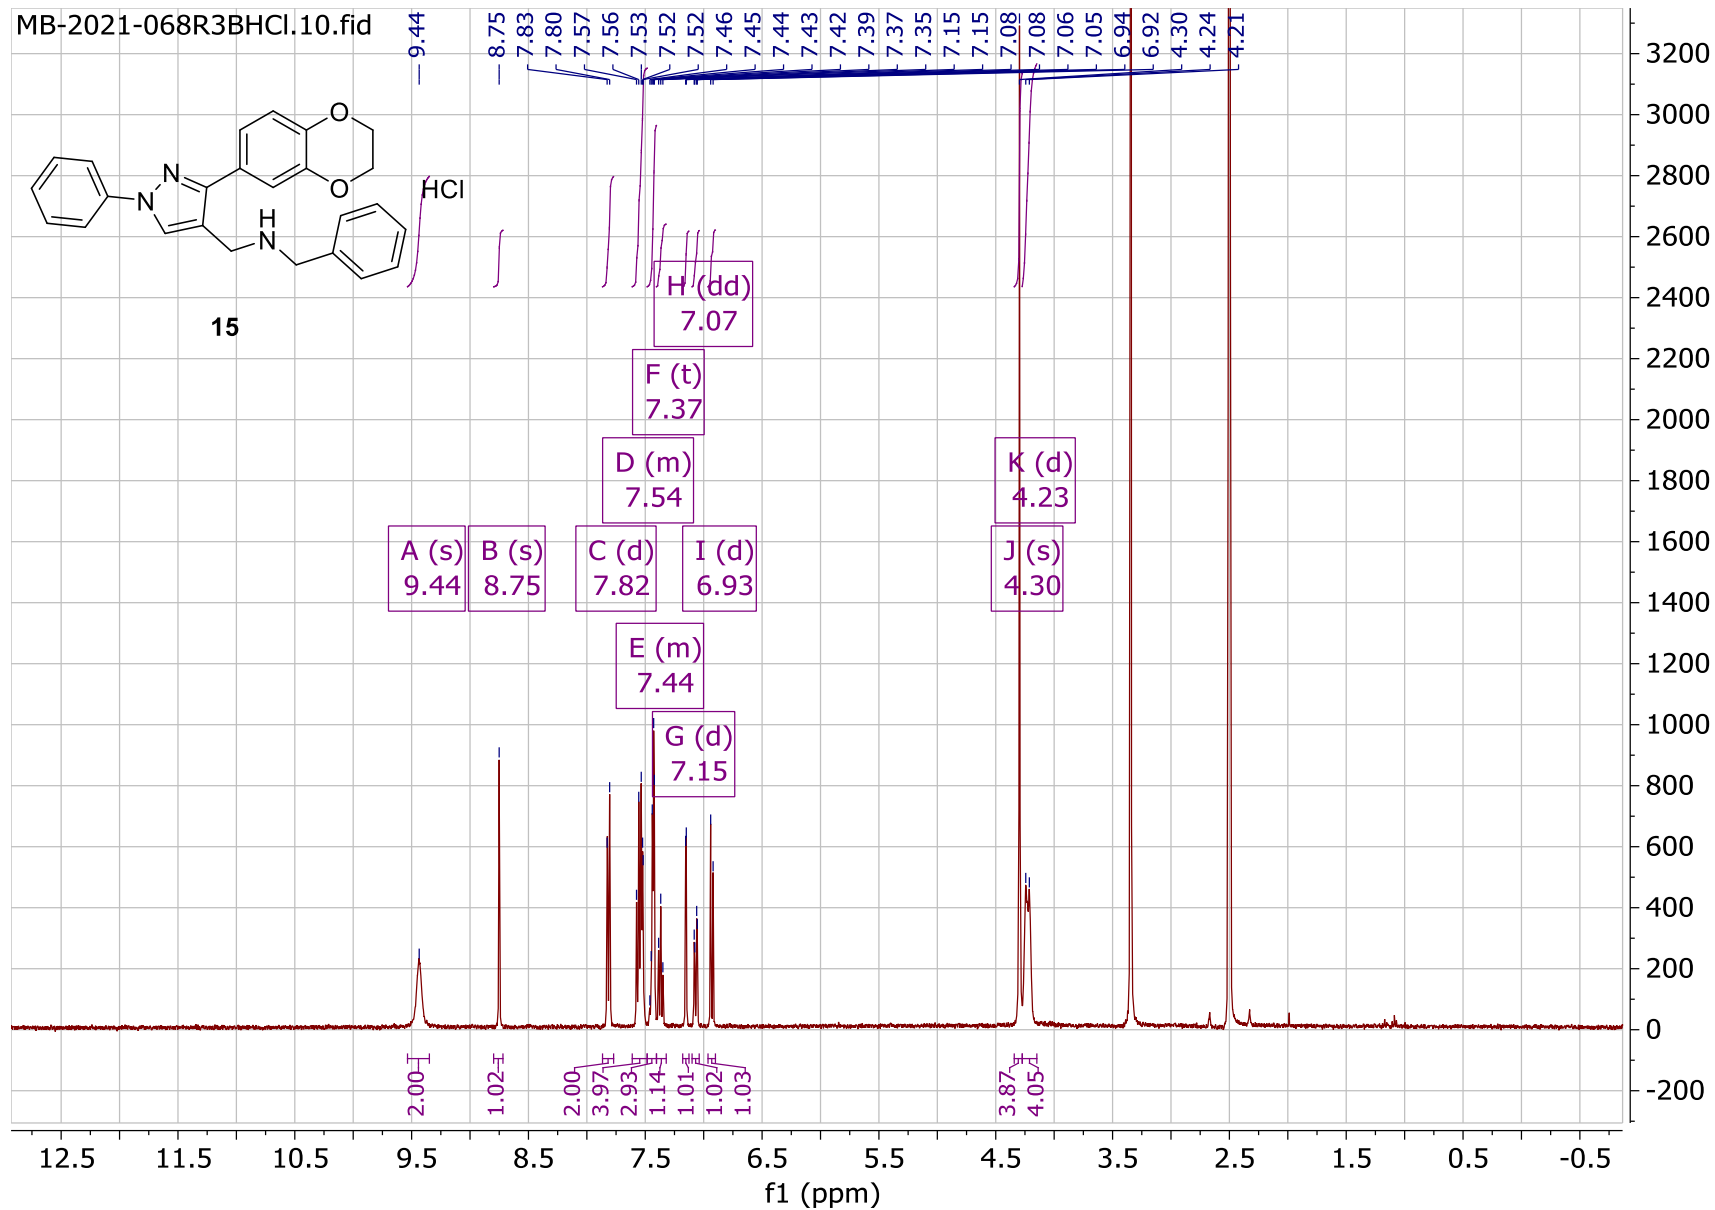

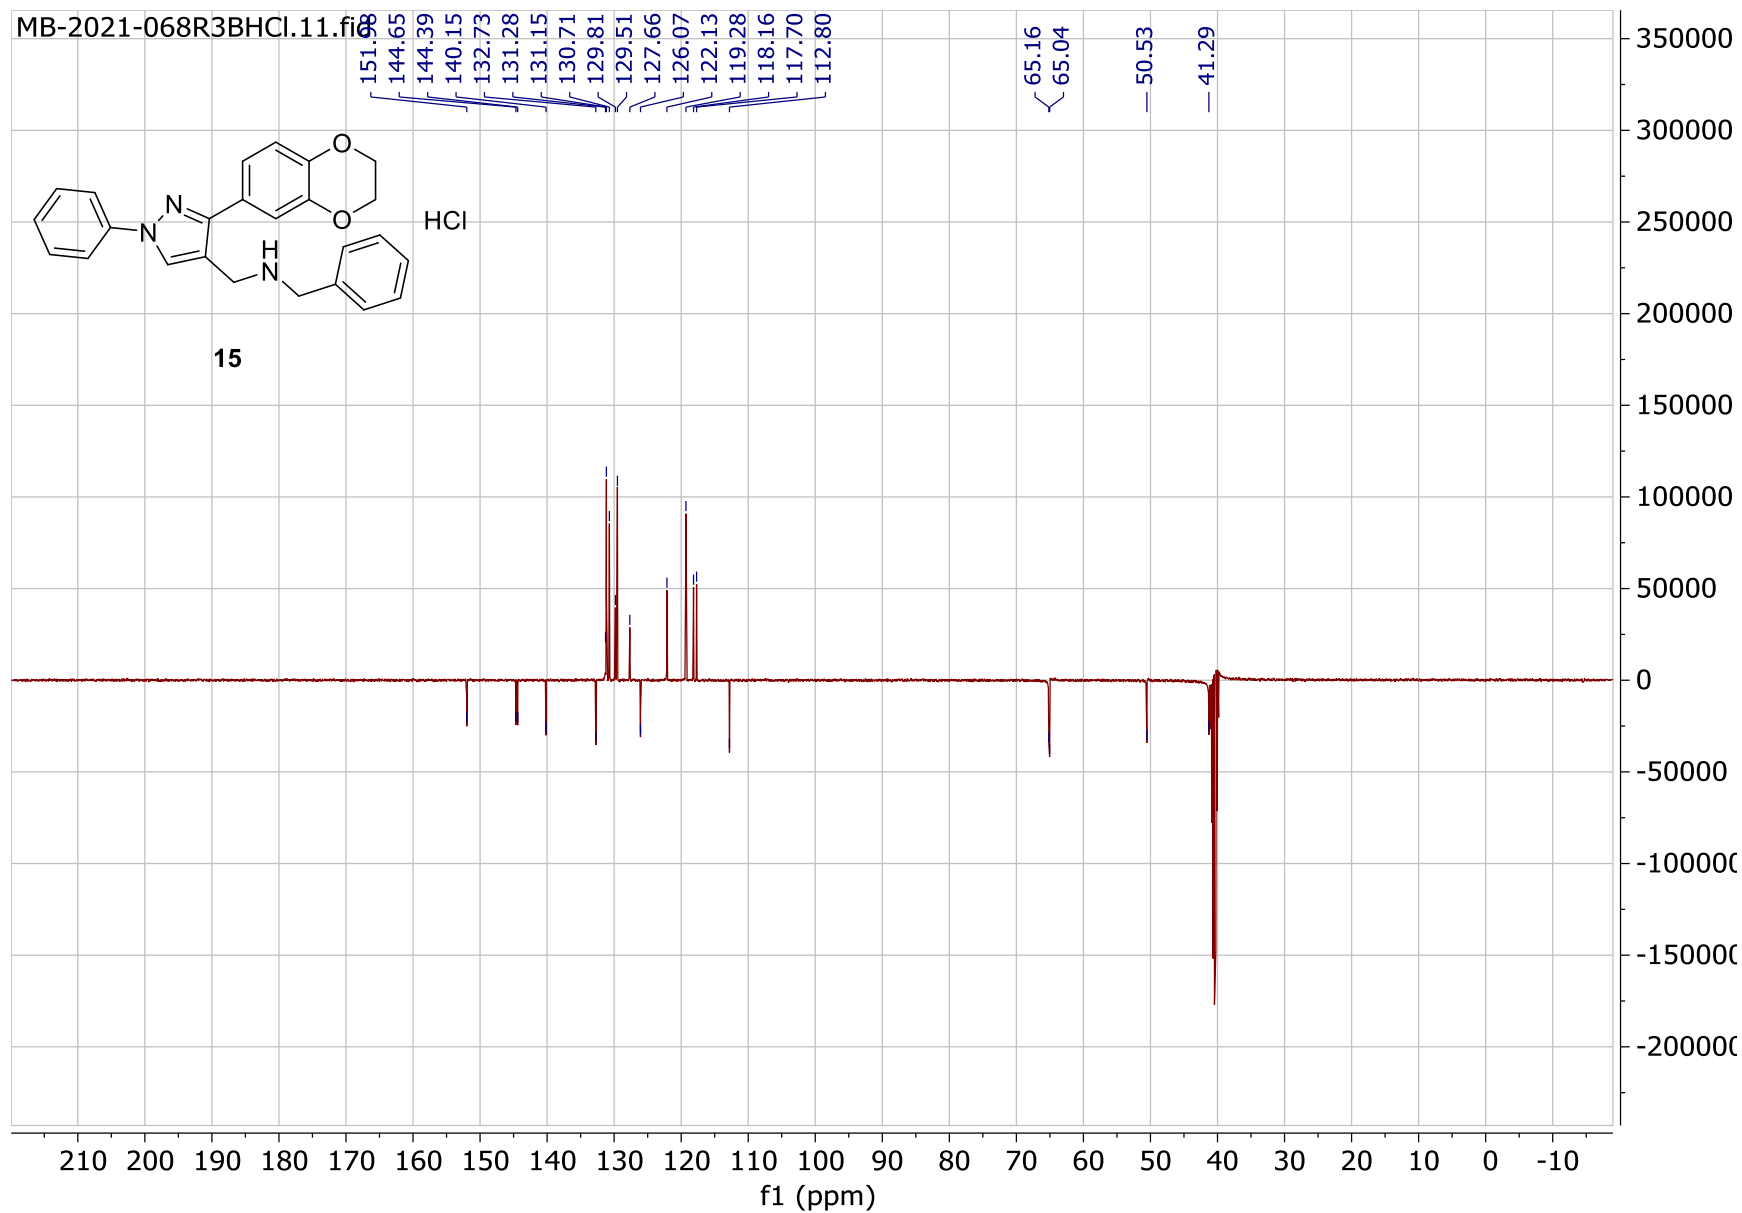

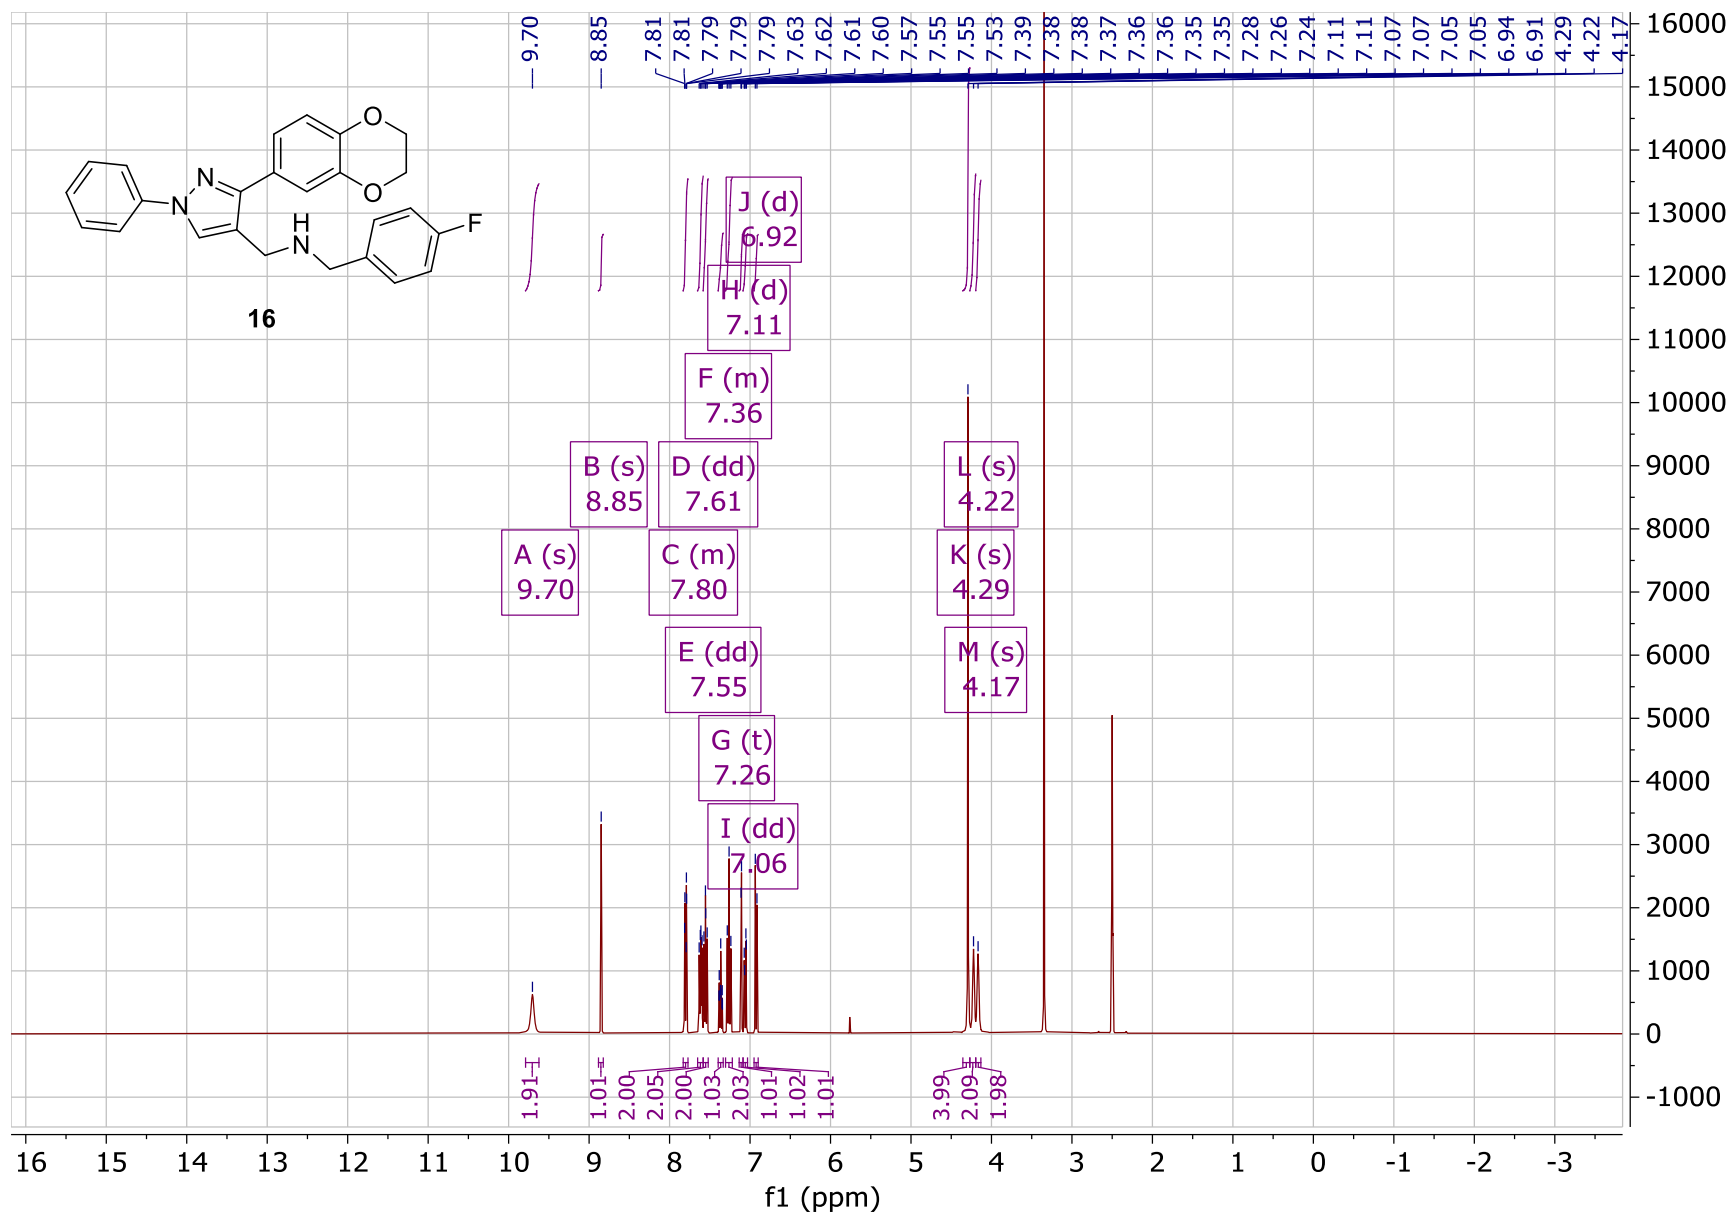

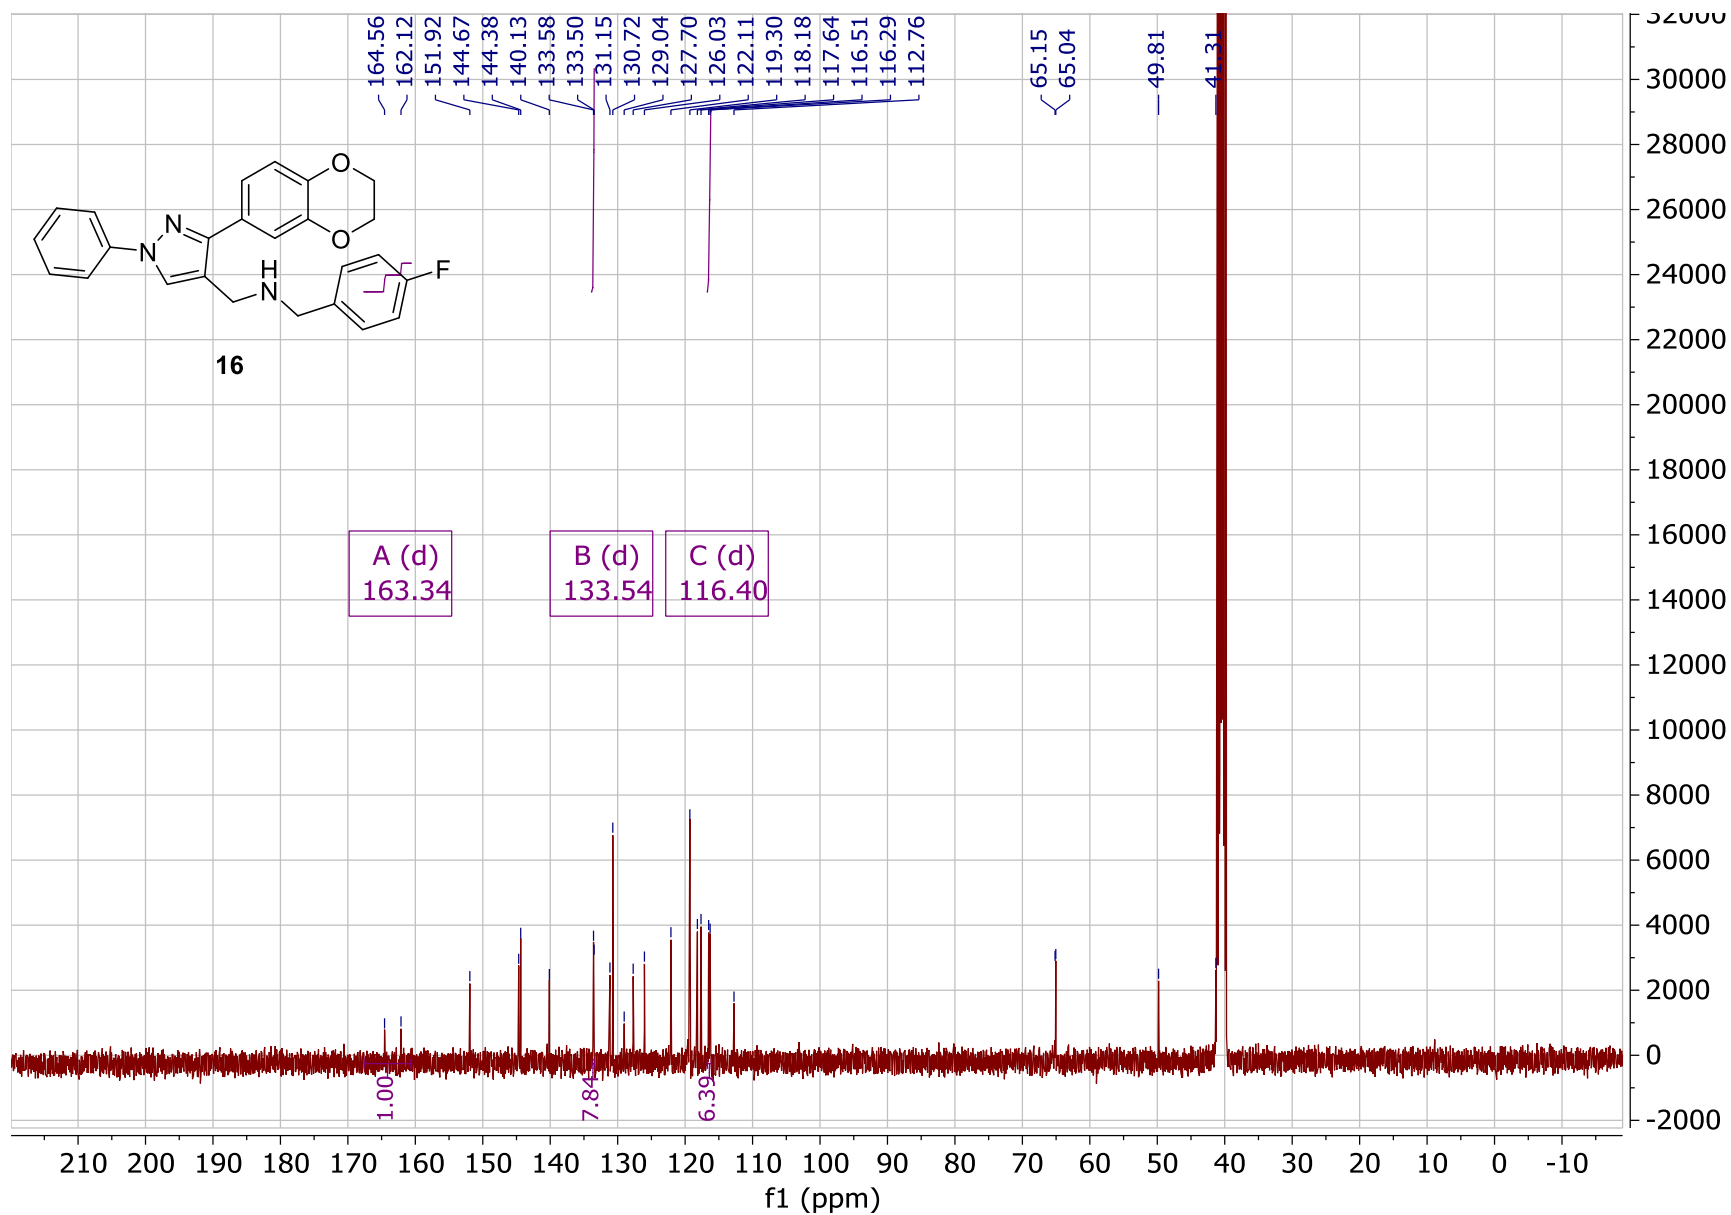

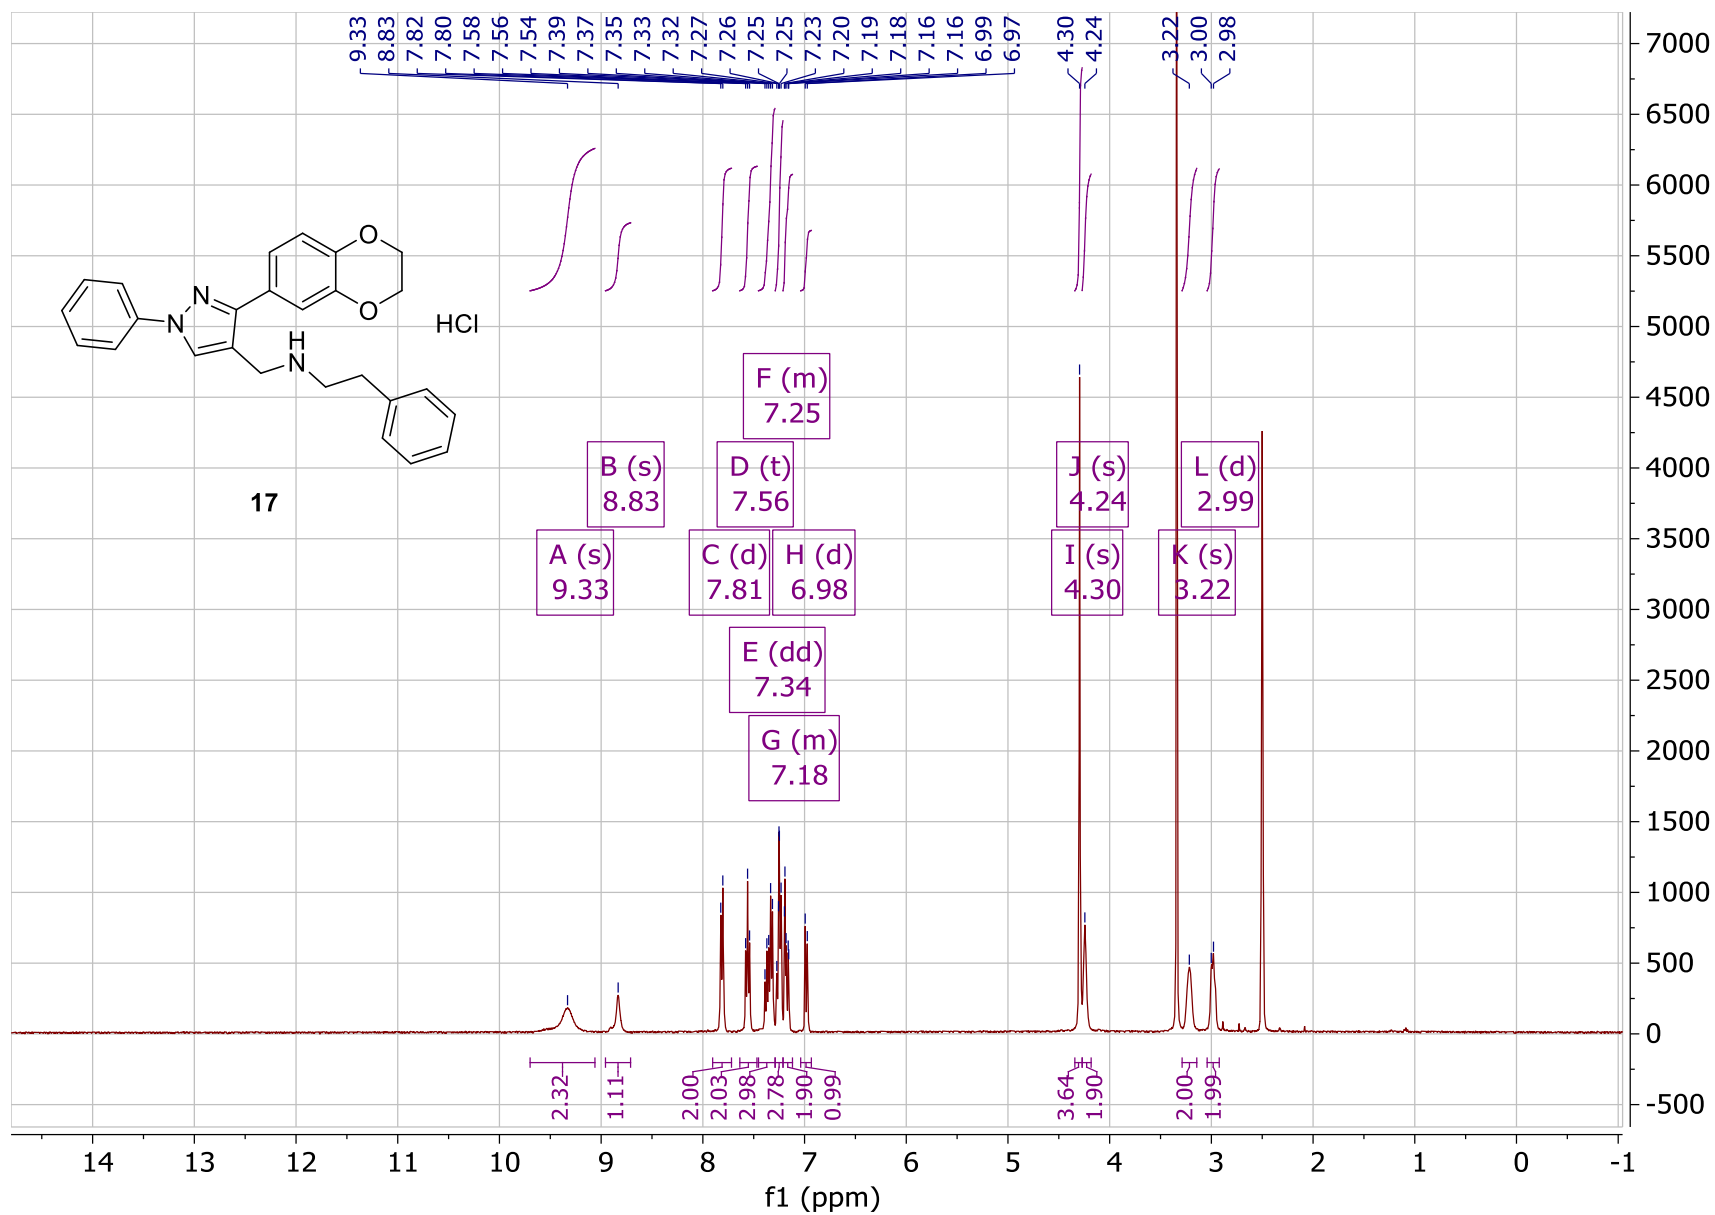

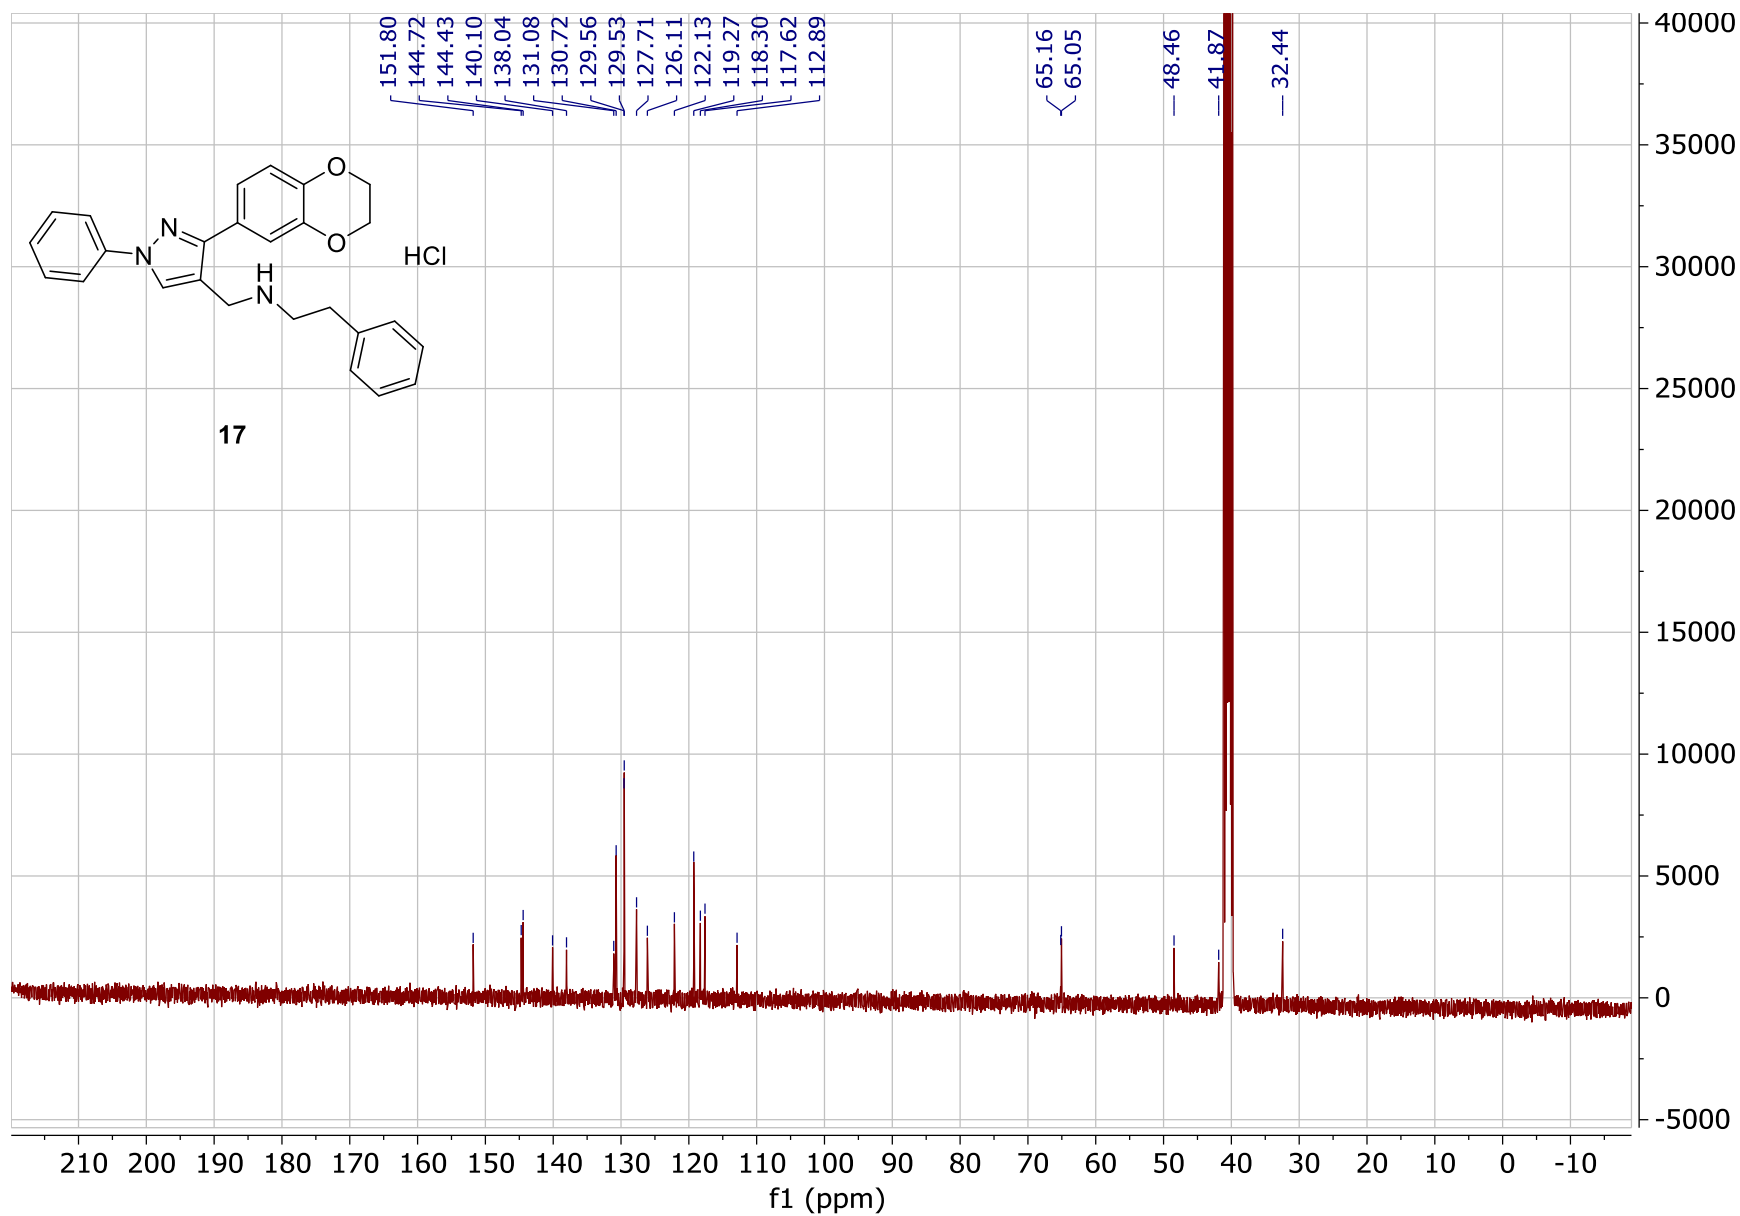

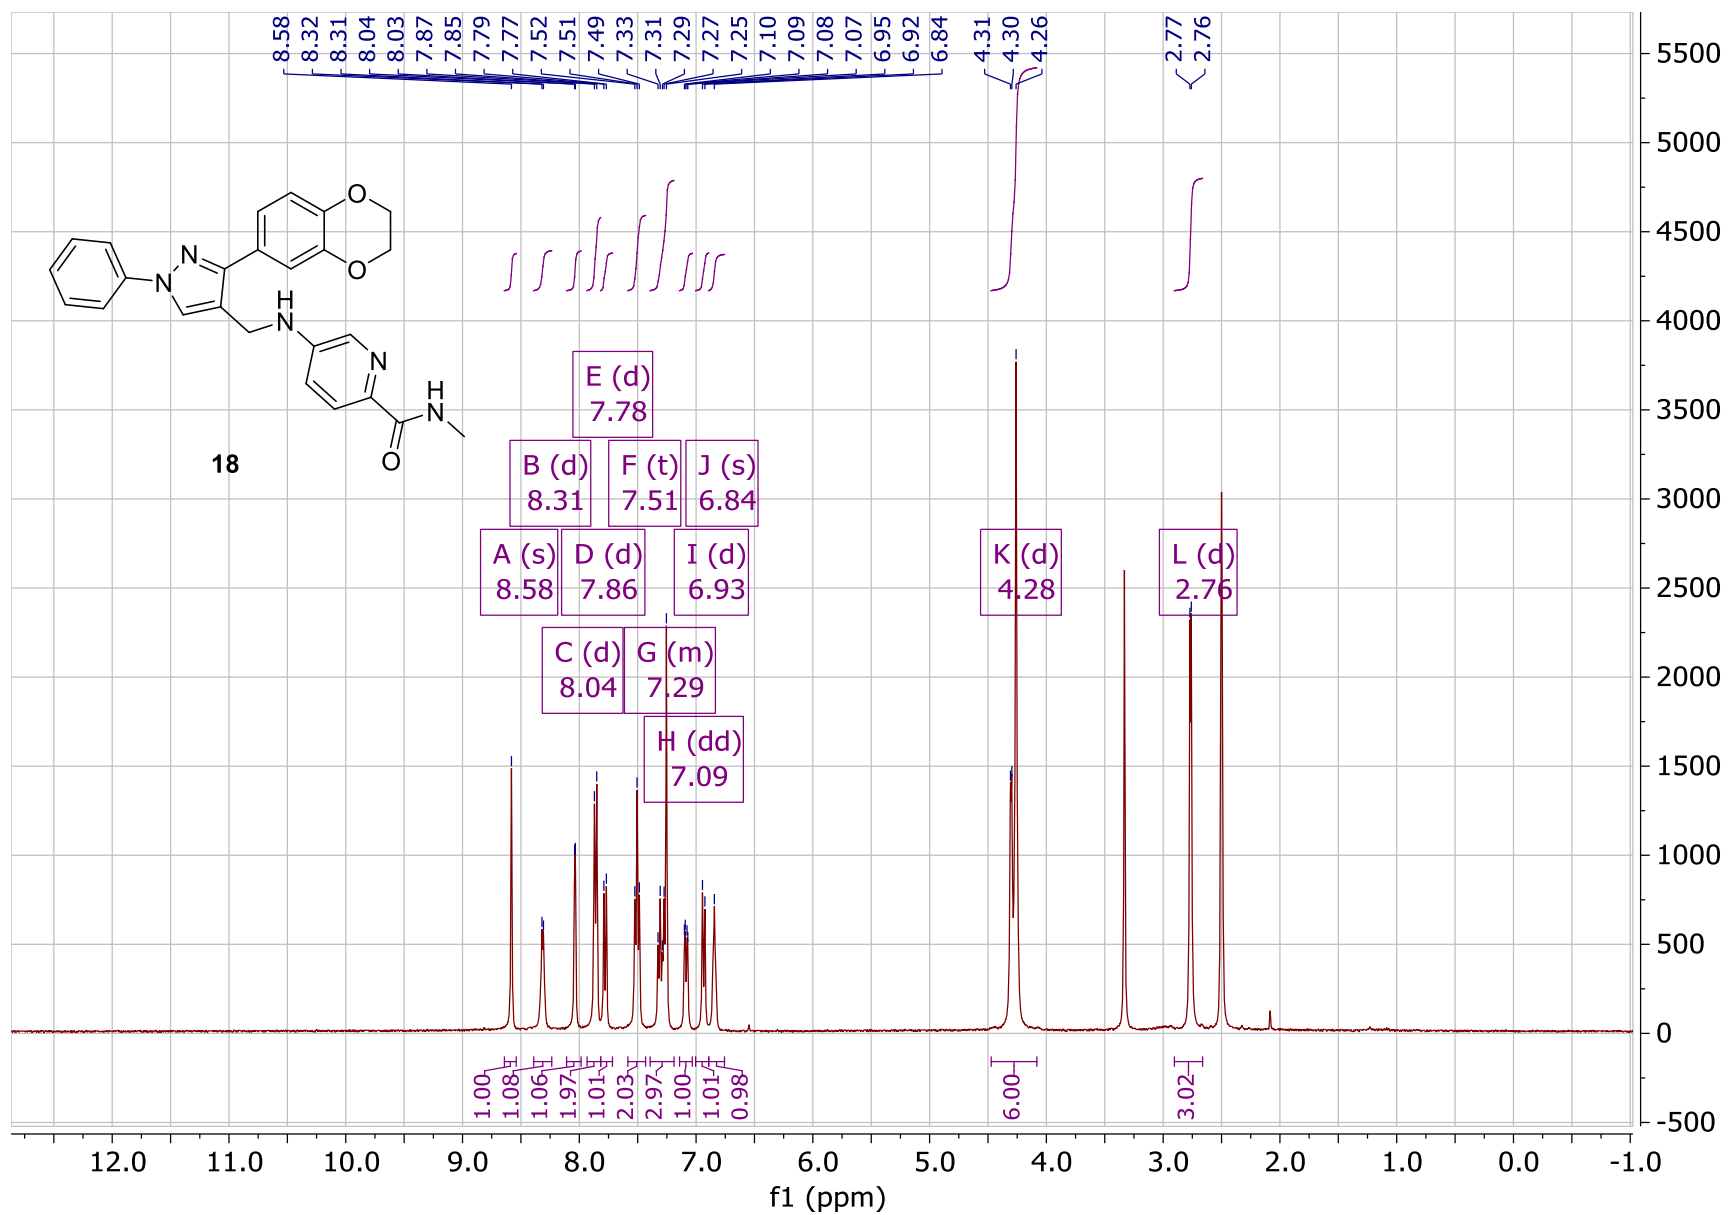



MB-2022-013B.11.fid

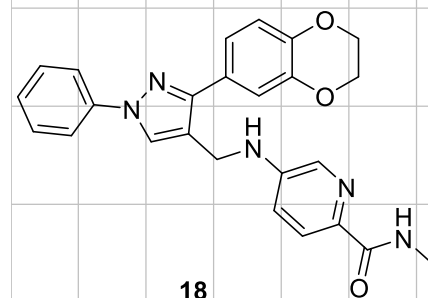

165.83  
151.09  
147.38  
144.42  
144.30  
140.35  
139.12  
134.64  
130.52  
130.00  
127.09  
126.89  
123.59  
121.38  
118.96  
118.41  
118.21  
118.09  
116.90

65.09  
65.00

38.47

26.69

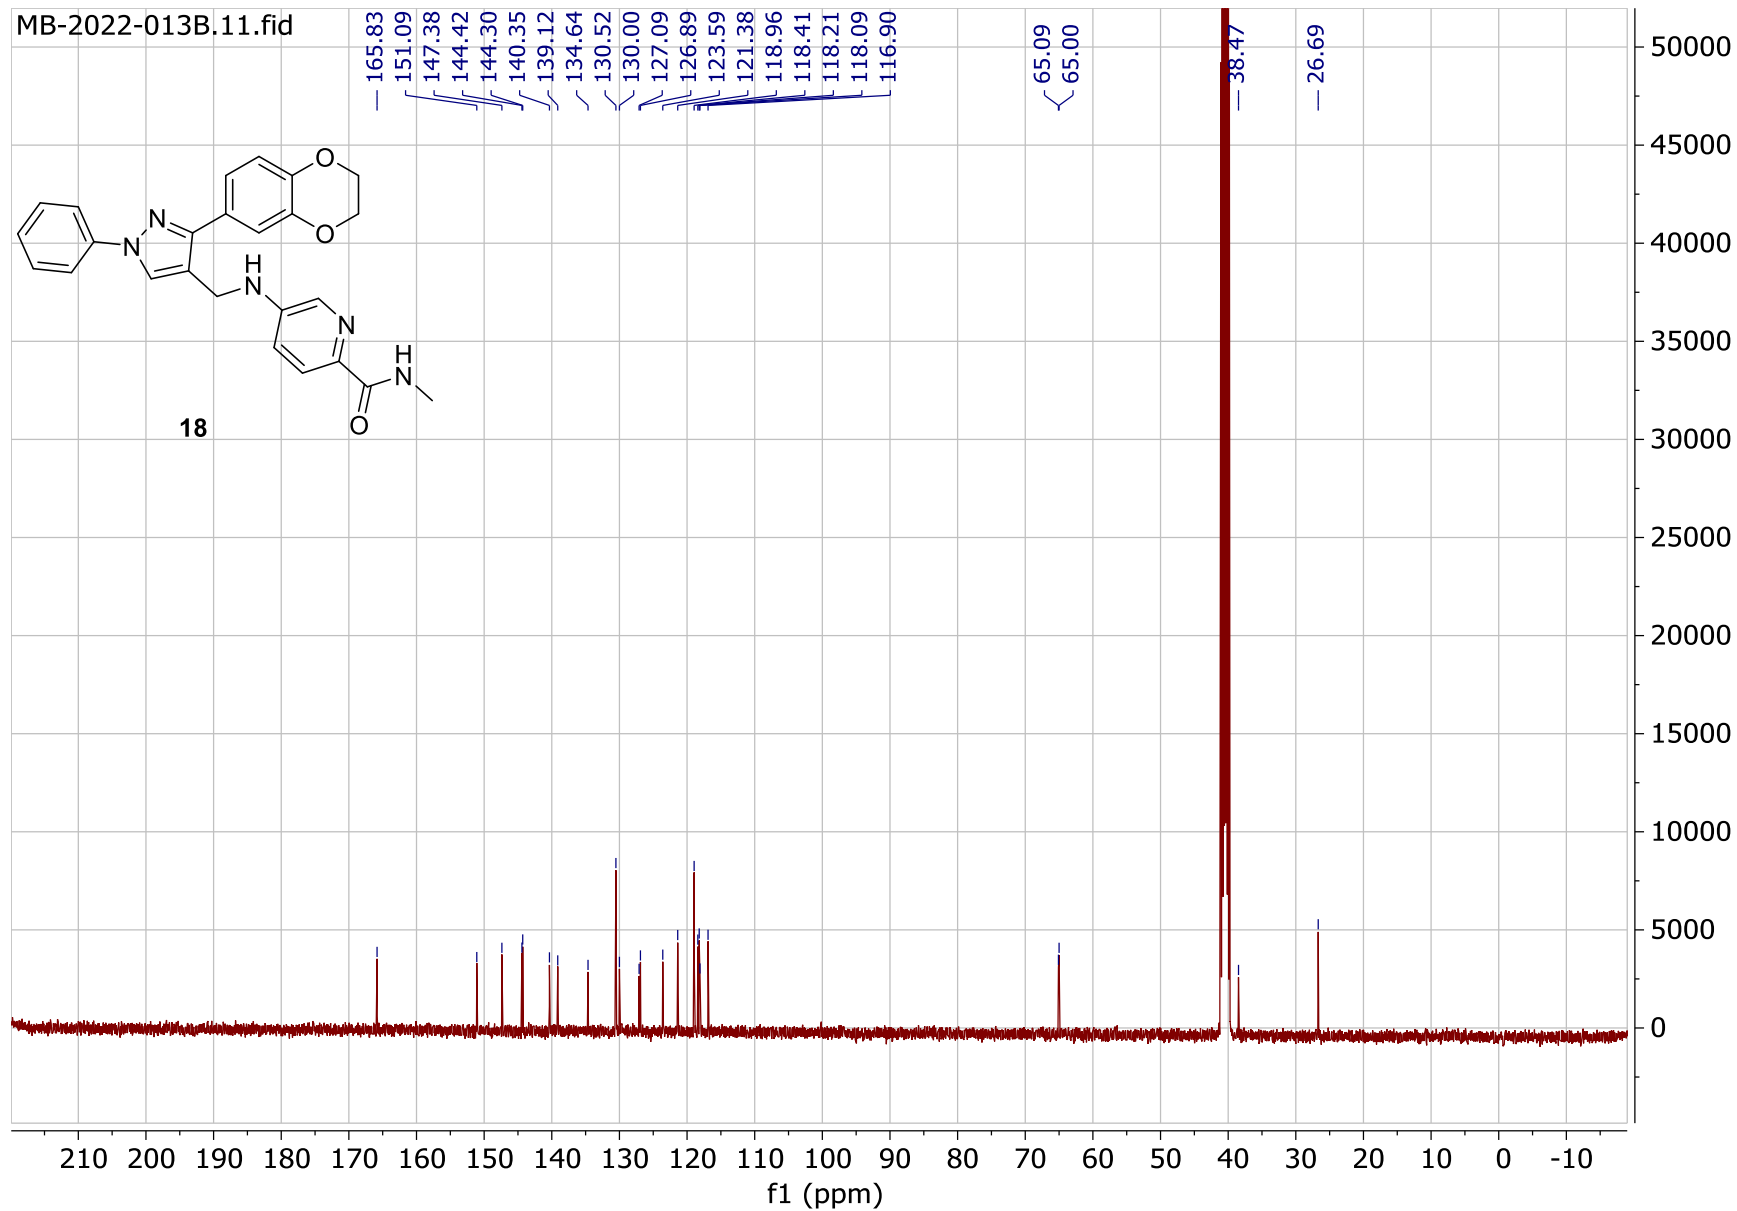

MB-2021-049.13.fid

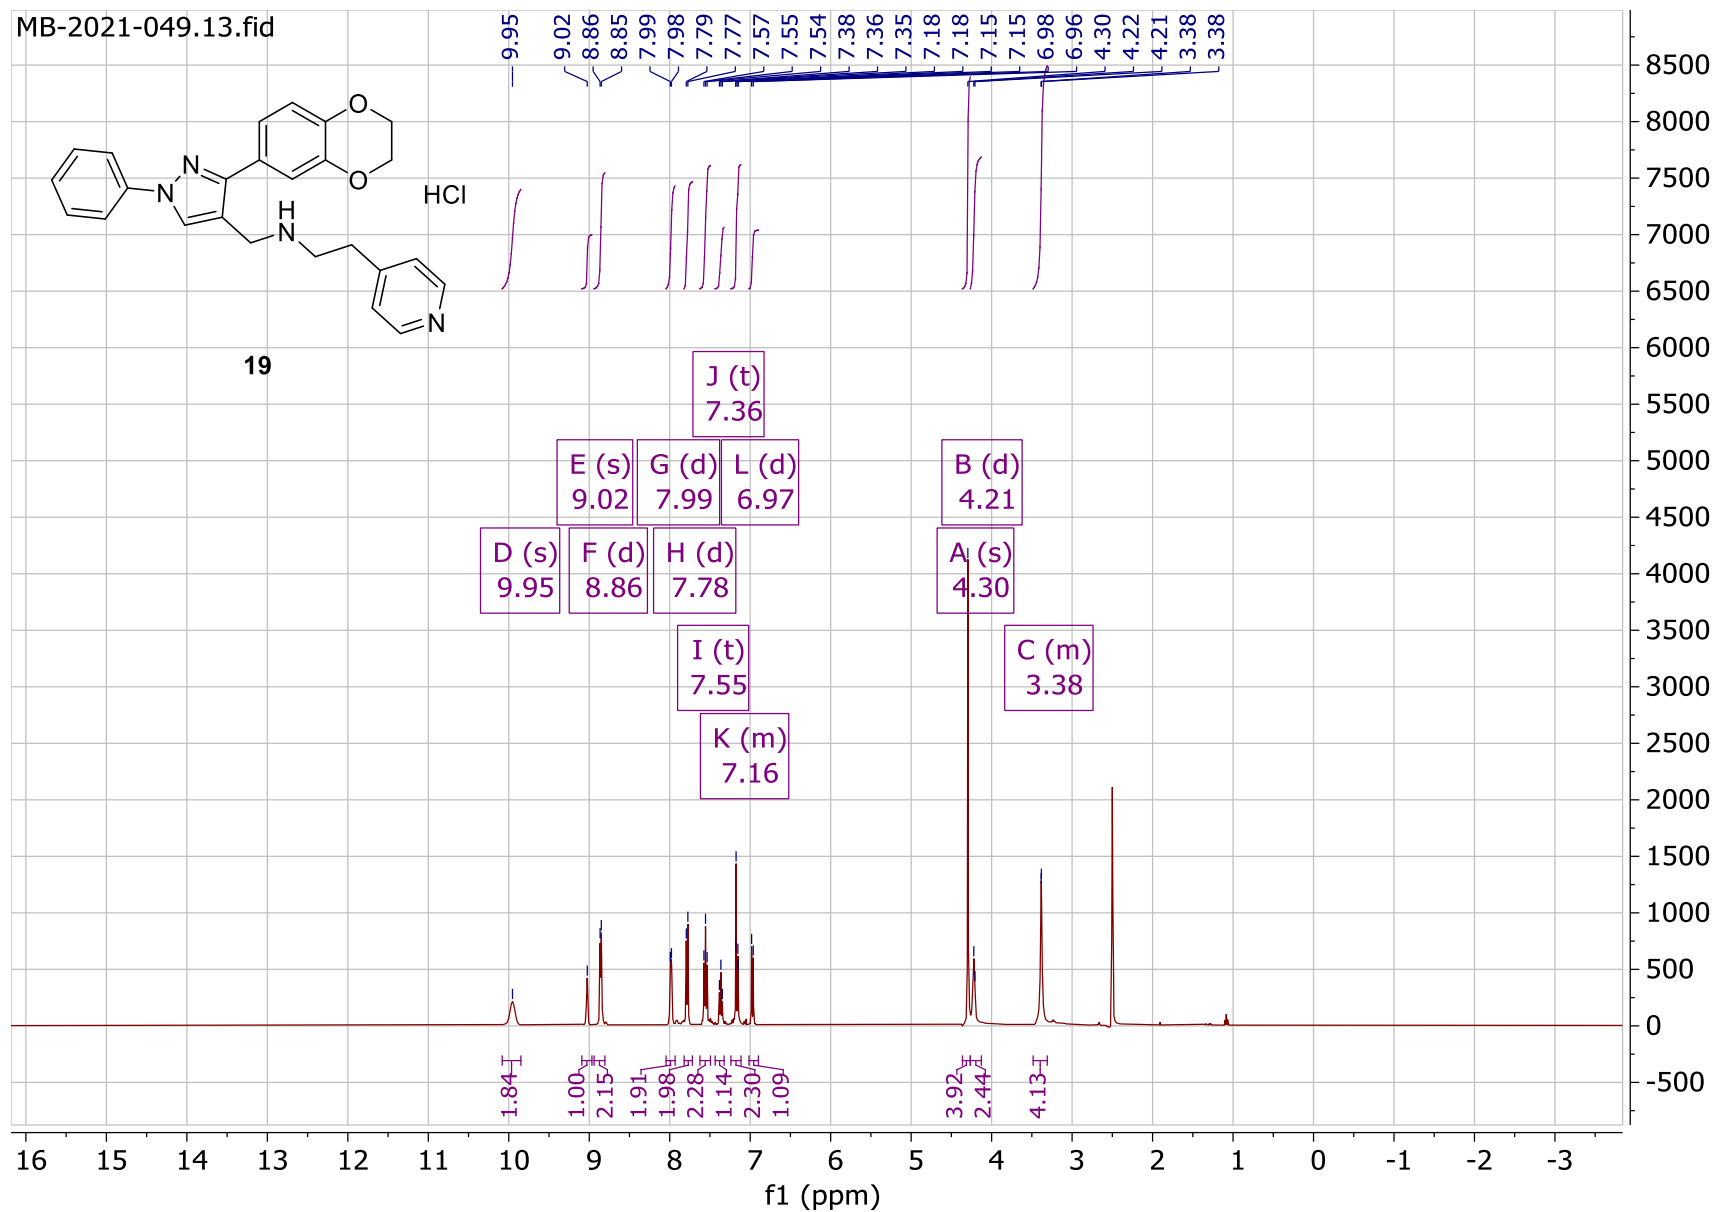

MB-2021-049.12.fid

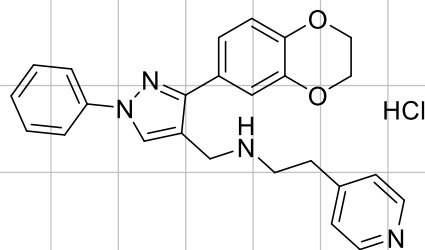

HCl

19

151.79  
144.67  
144.38  
140.10  
131.62  
130.69  
128.09  
127.65  
126.08  
122.19  
119.23  
118.25  
117.66  
112.83

65.13  
65.03

46.40  
41.99

32.15

35000

30000

25000

20000

15000

10000

5000

0

-5000

-10000

-15000

-20000

210 200 190 180 170 160 150 140 130 120 110 100 90 80 70 60 50 40 30 20 10 0 -10

f1 (ppm)

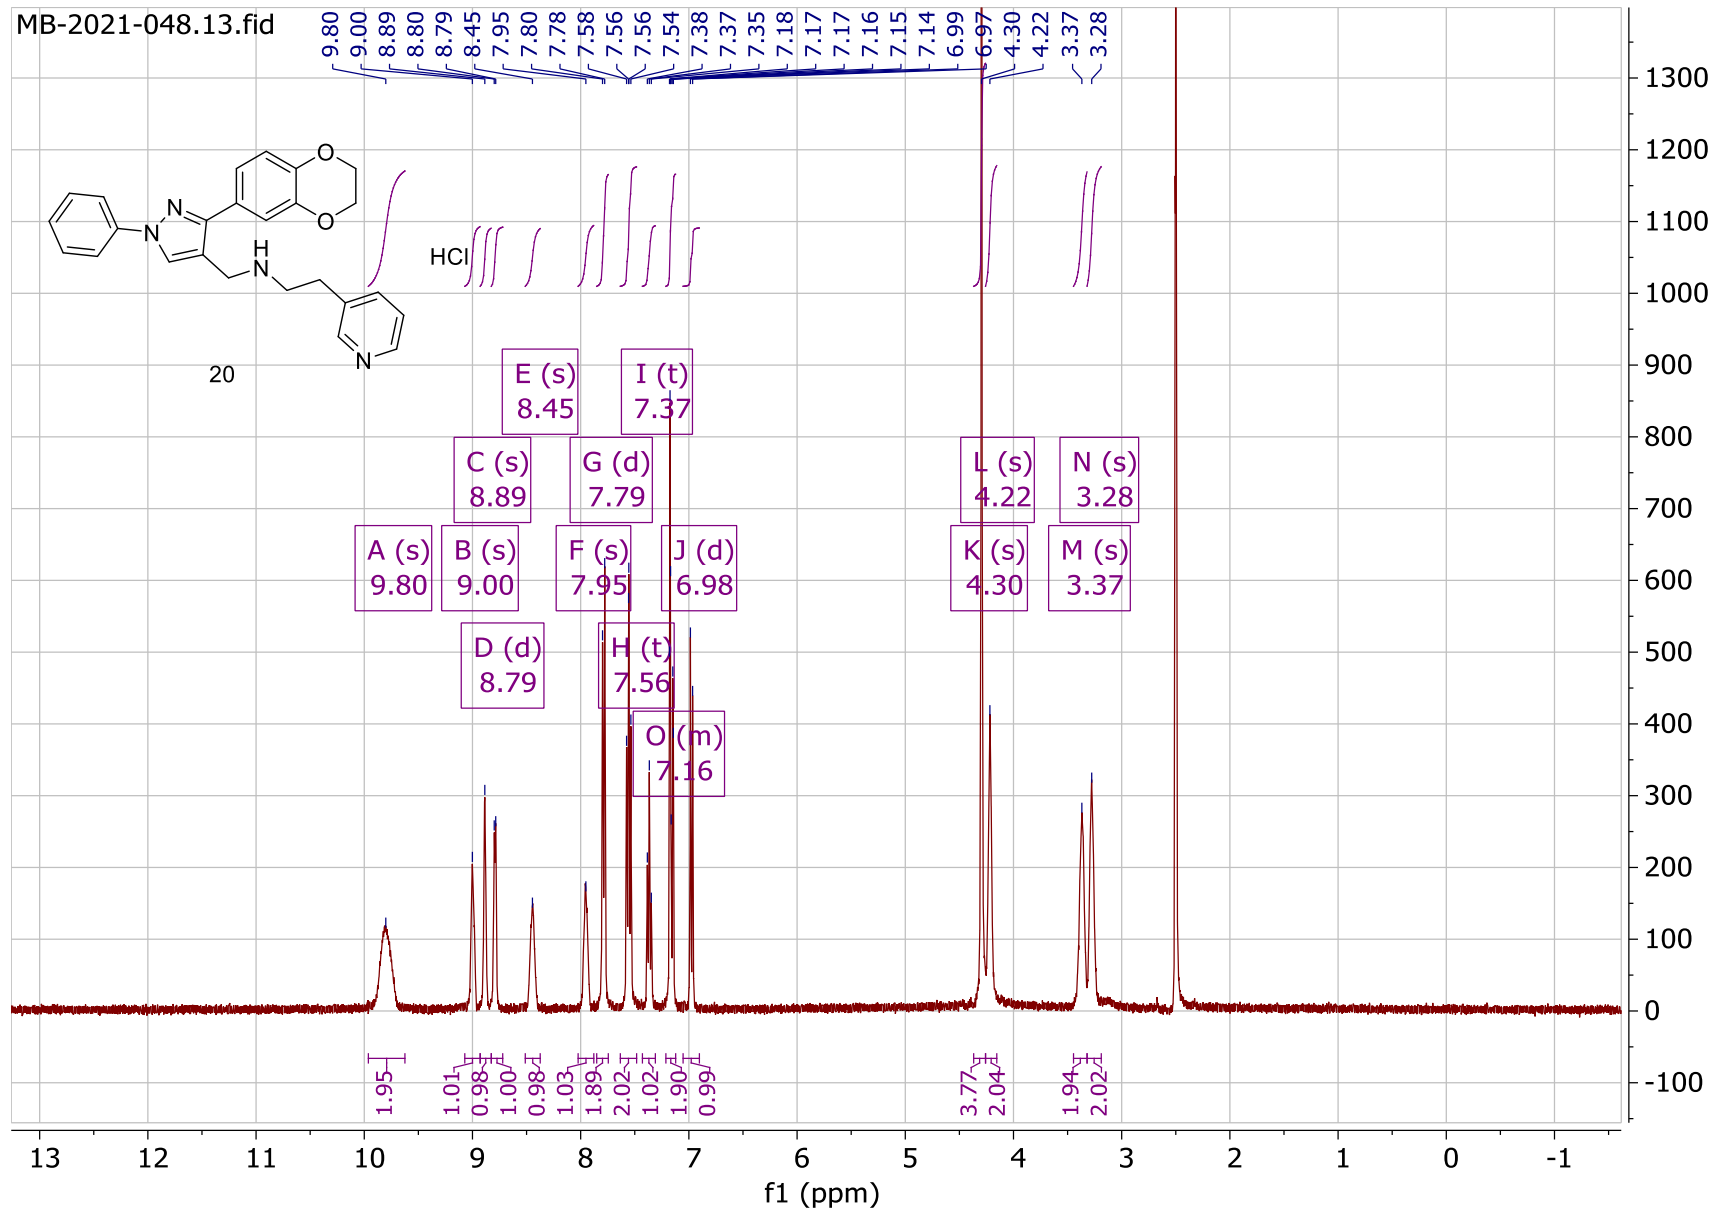

MB-2021-048.12.fid

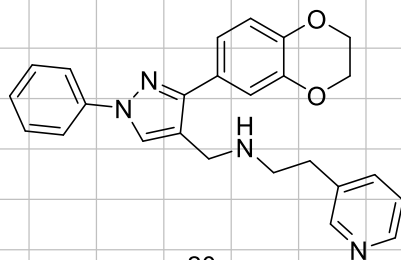

HCl

20

151.80  
146.74  
144.67  
144.39  
143.31  
141.35  
140.12  
138.06  
131.24  
130.69  
127.62  
126.10  
122.21  
119.22  
118.26  
117.68  
112.87

65.14  
65.04

47.20  
42.04

29.22

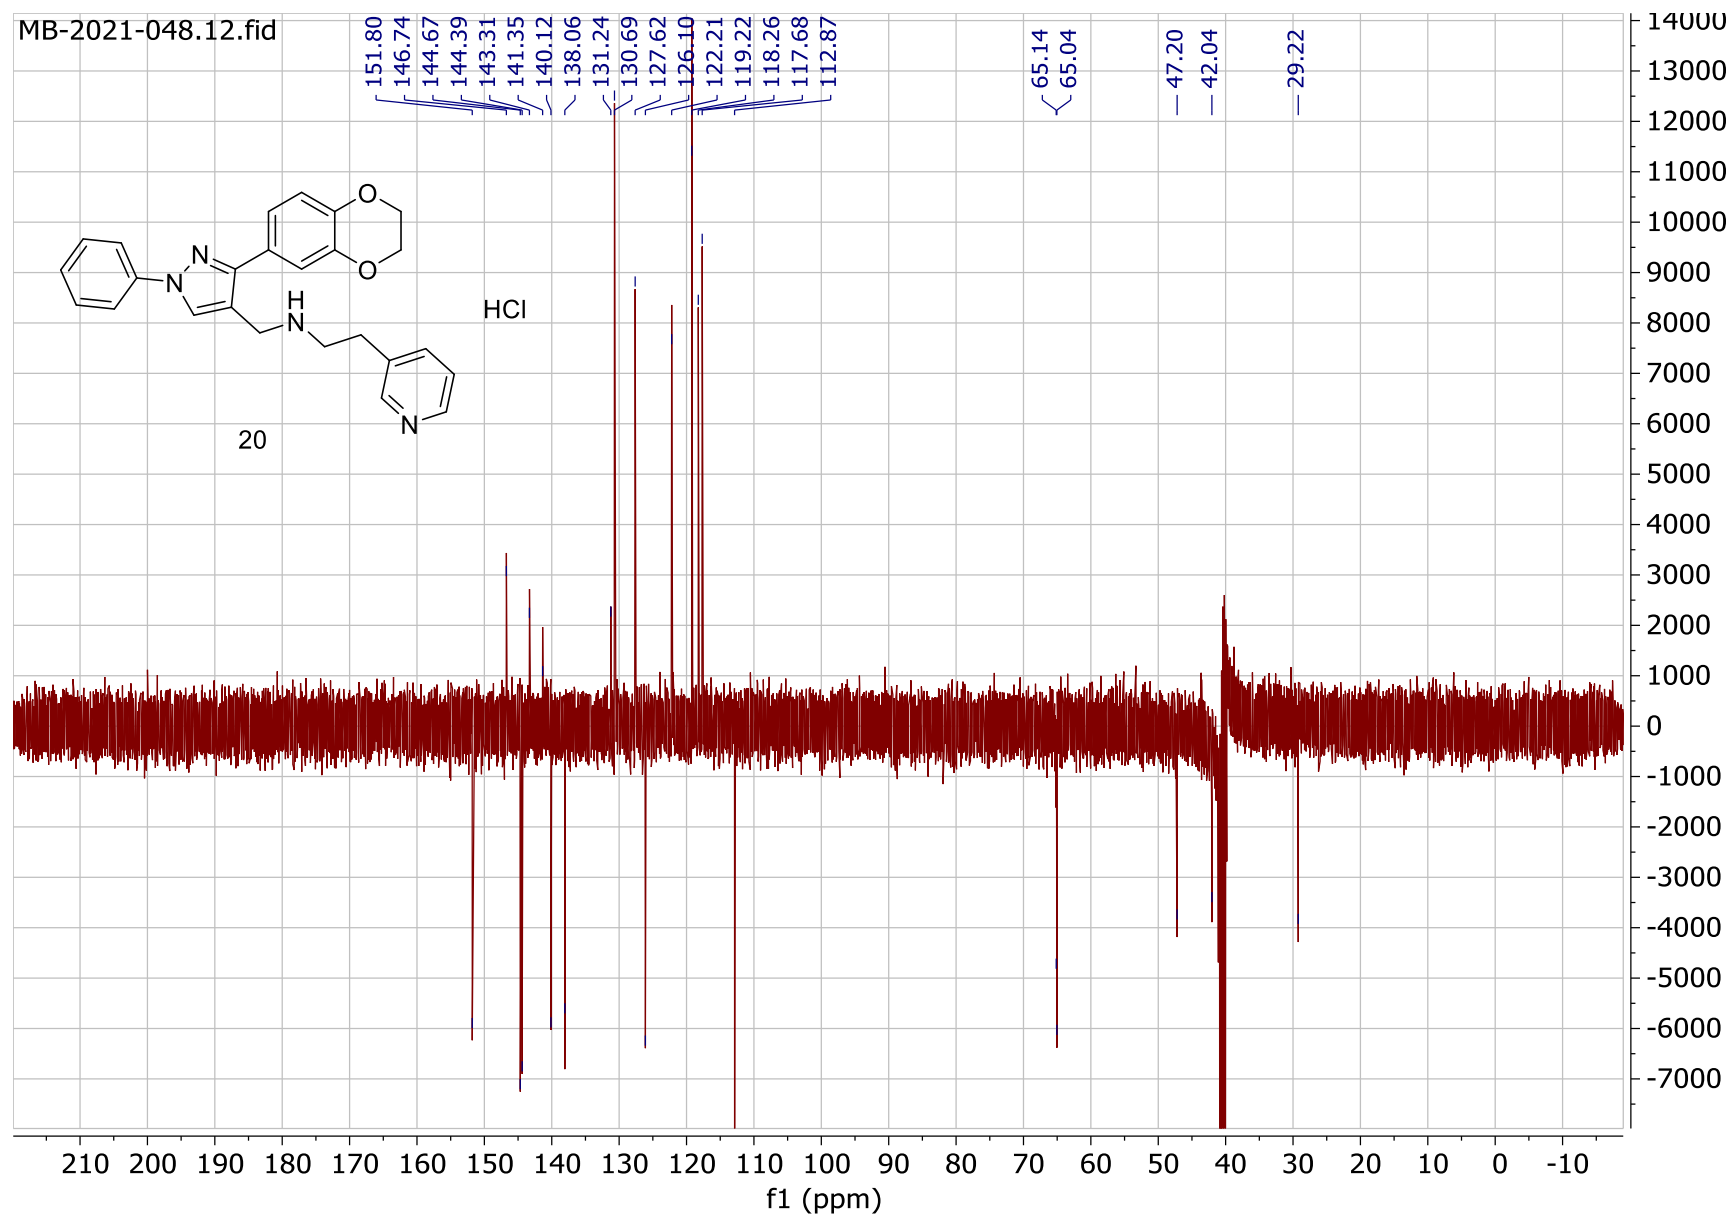

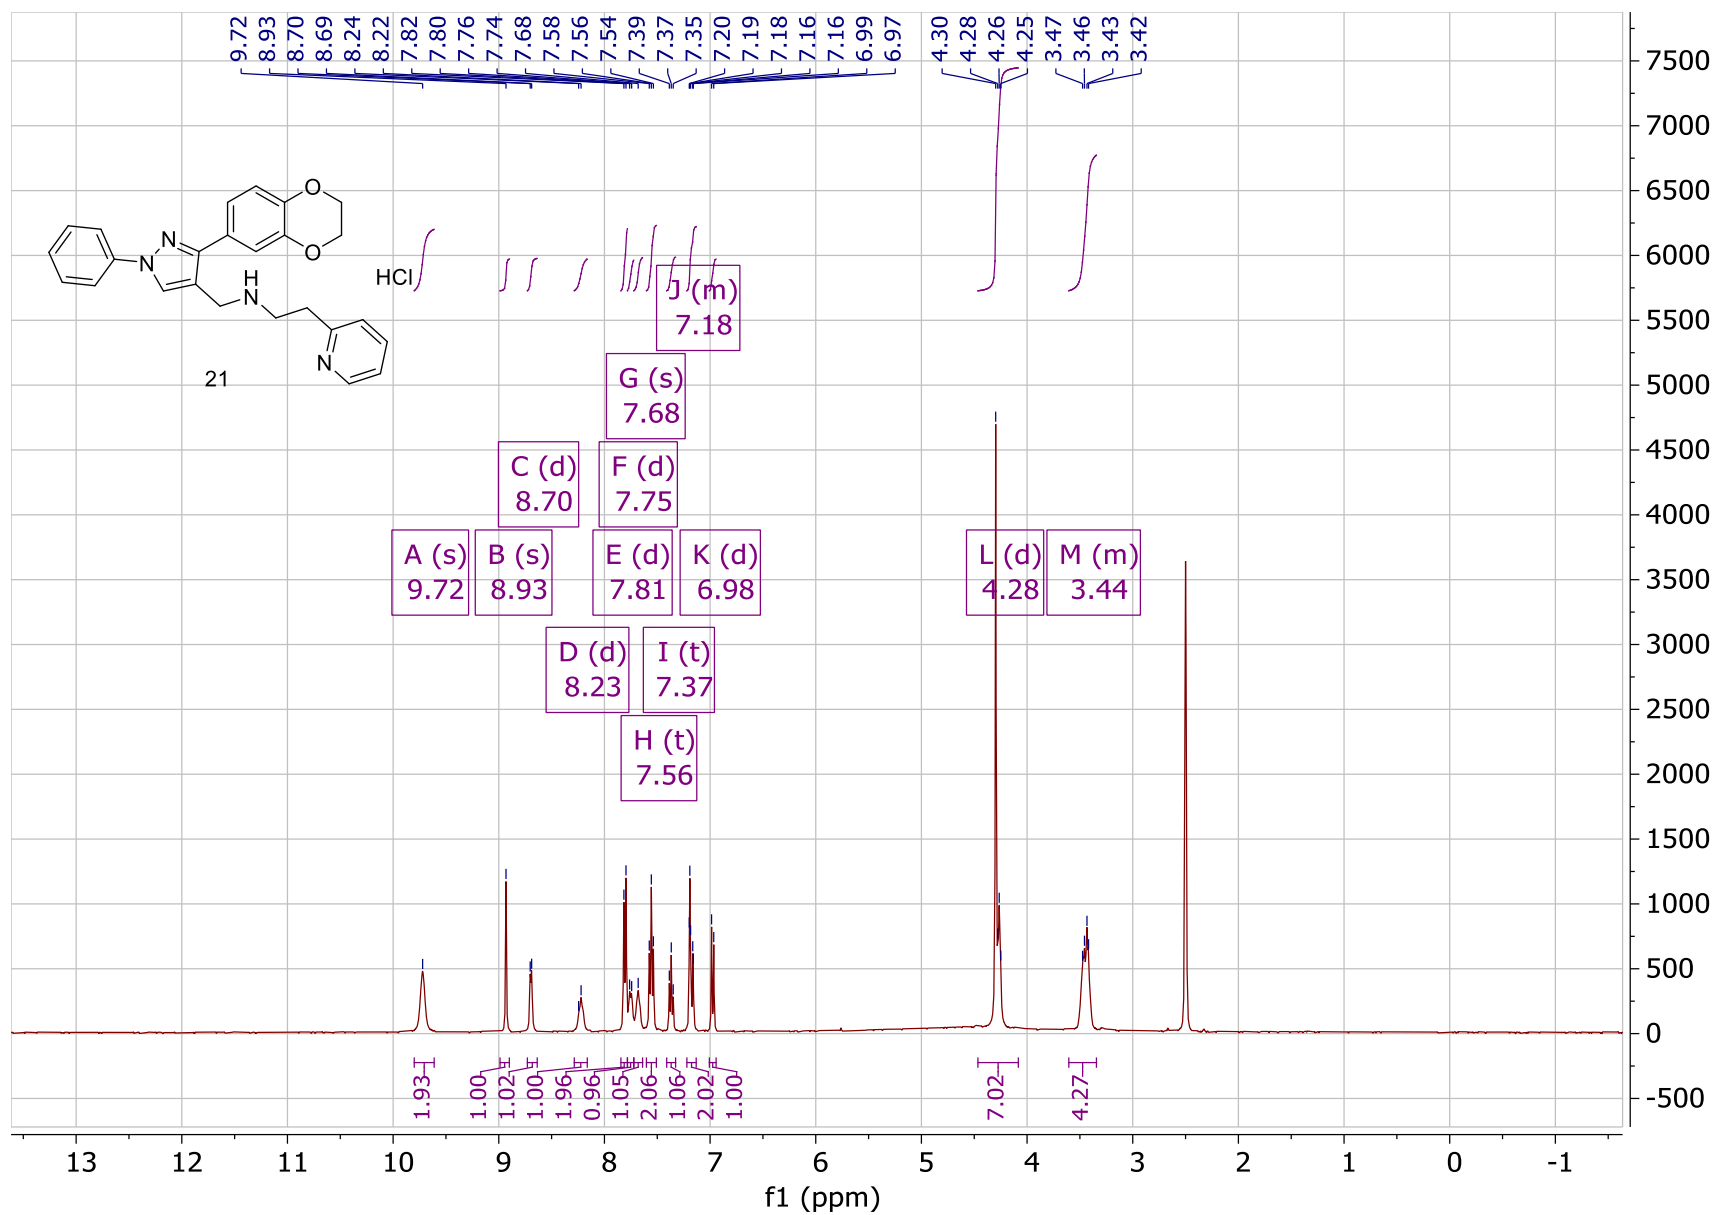

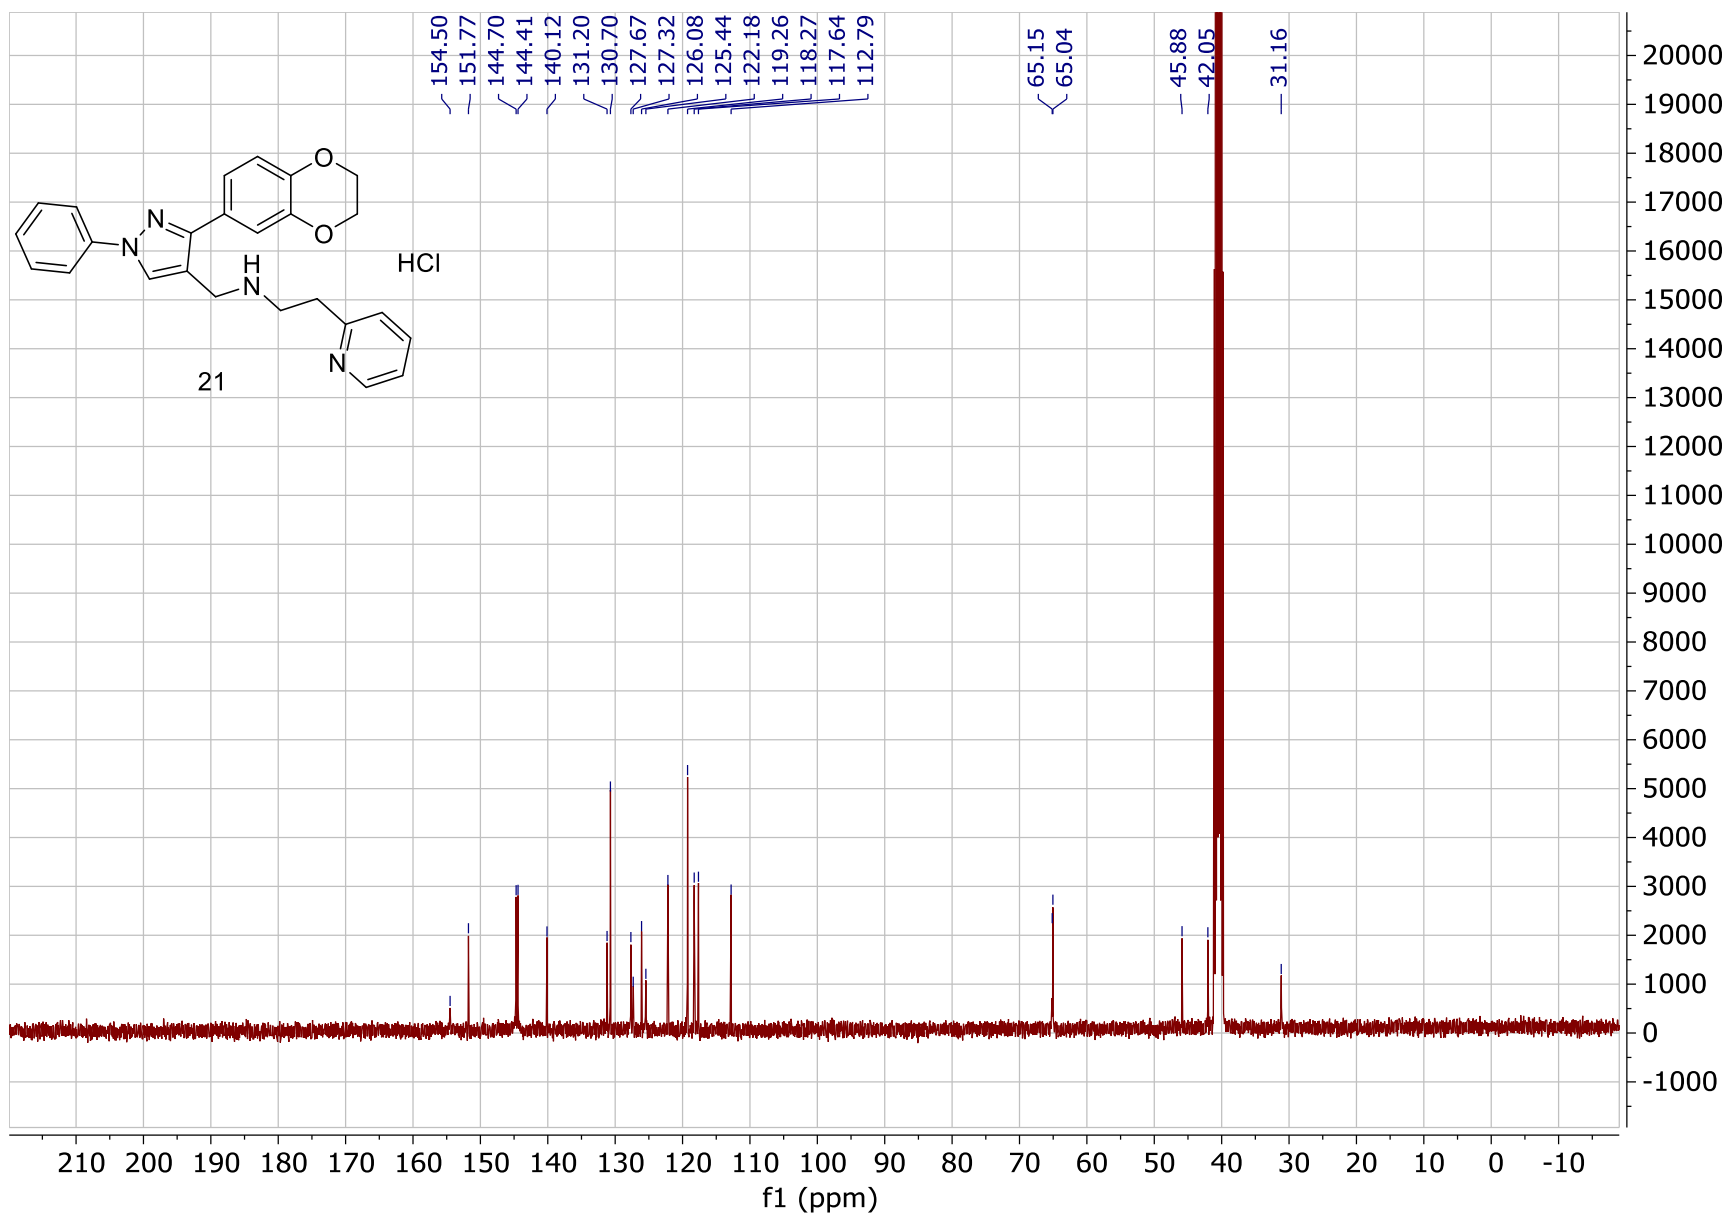

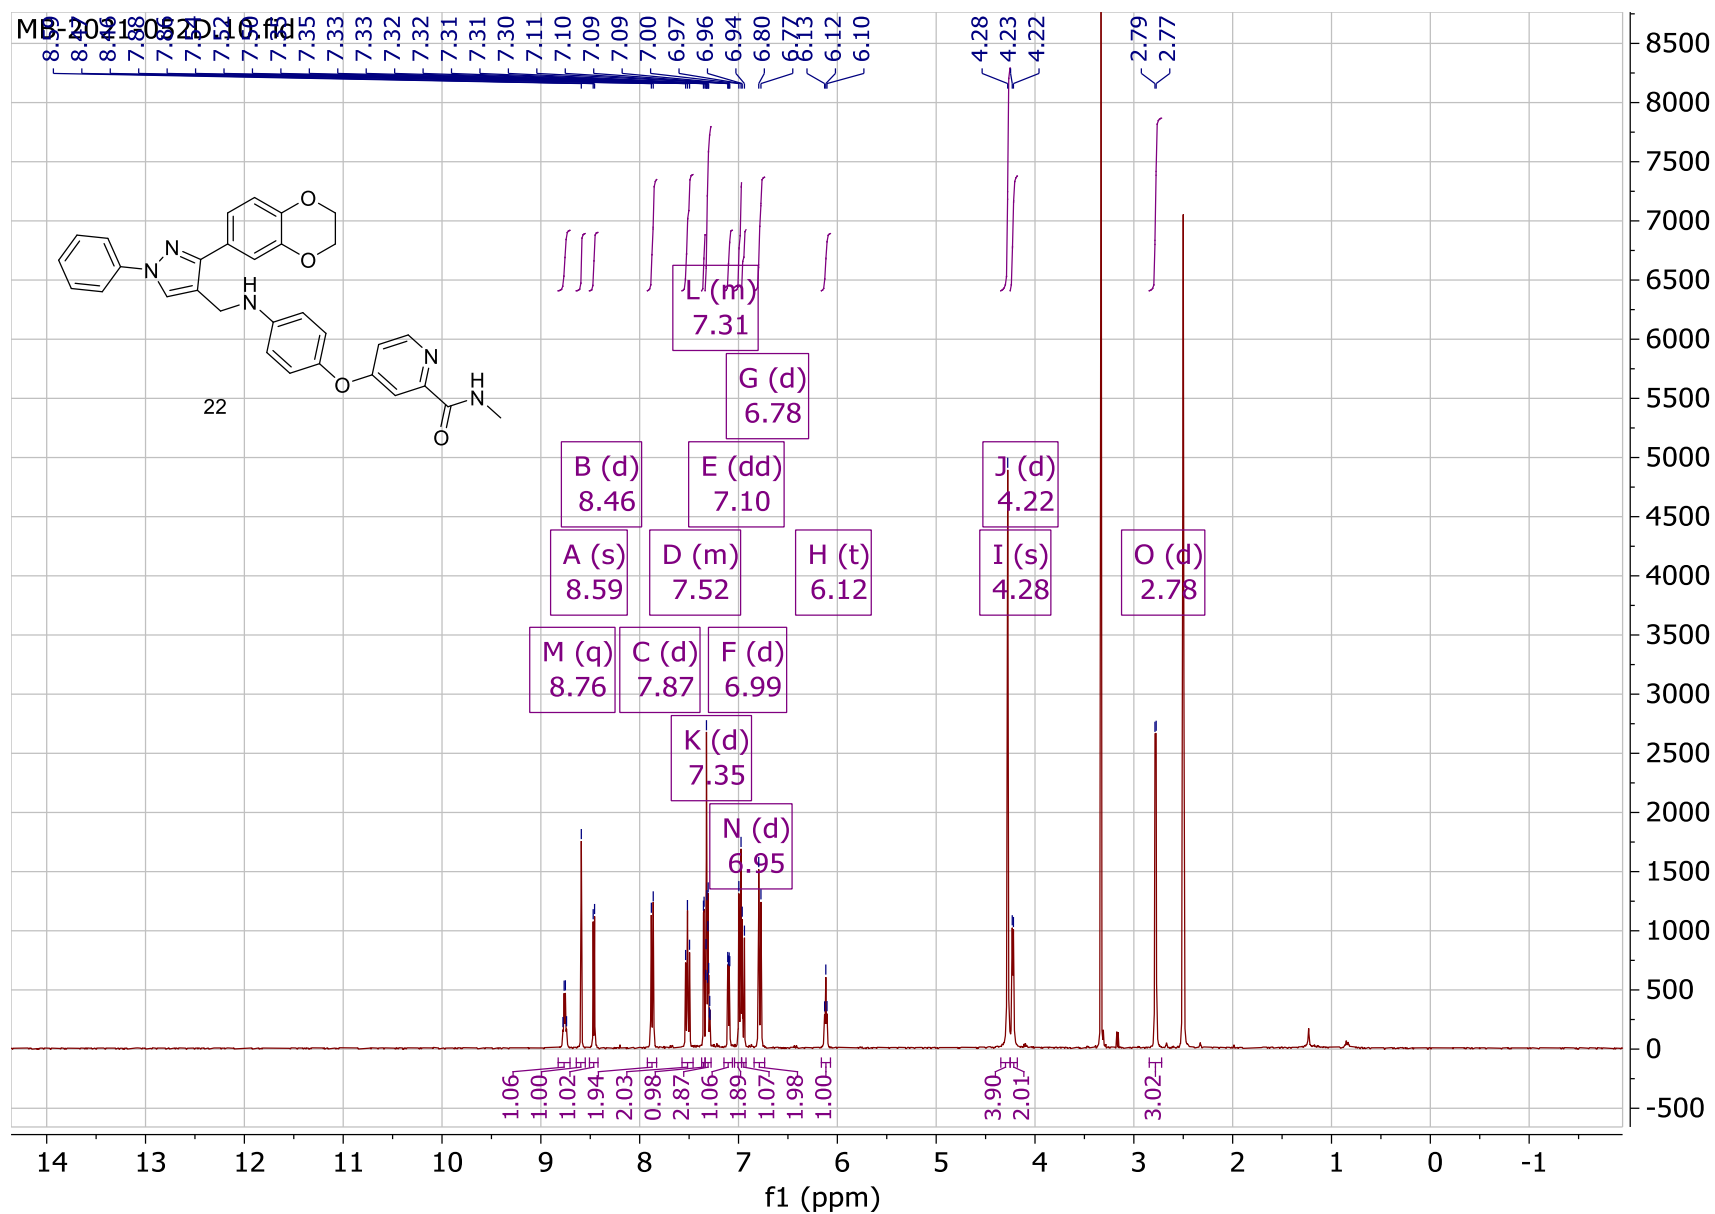



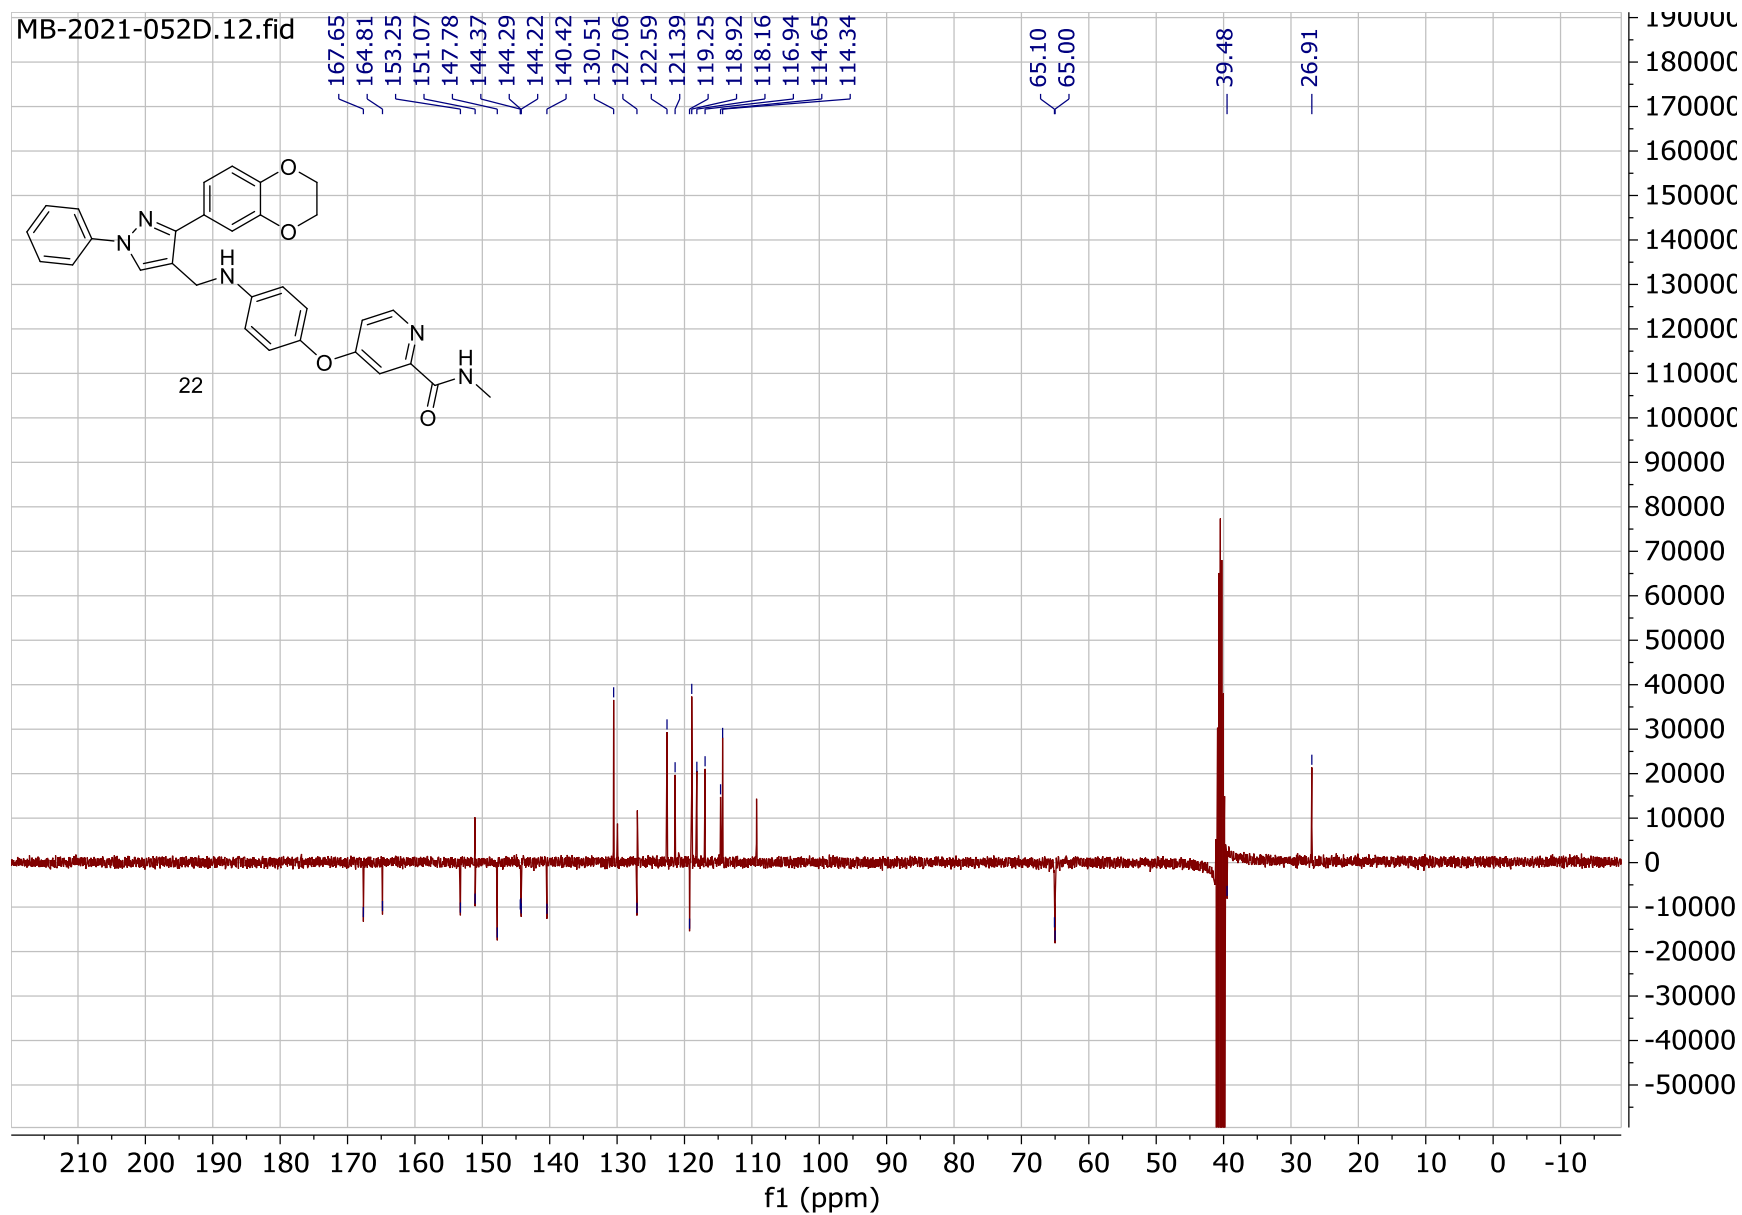

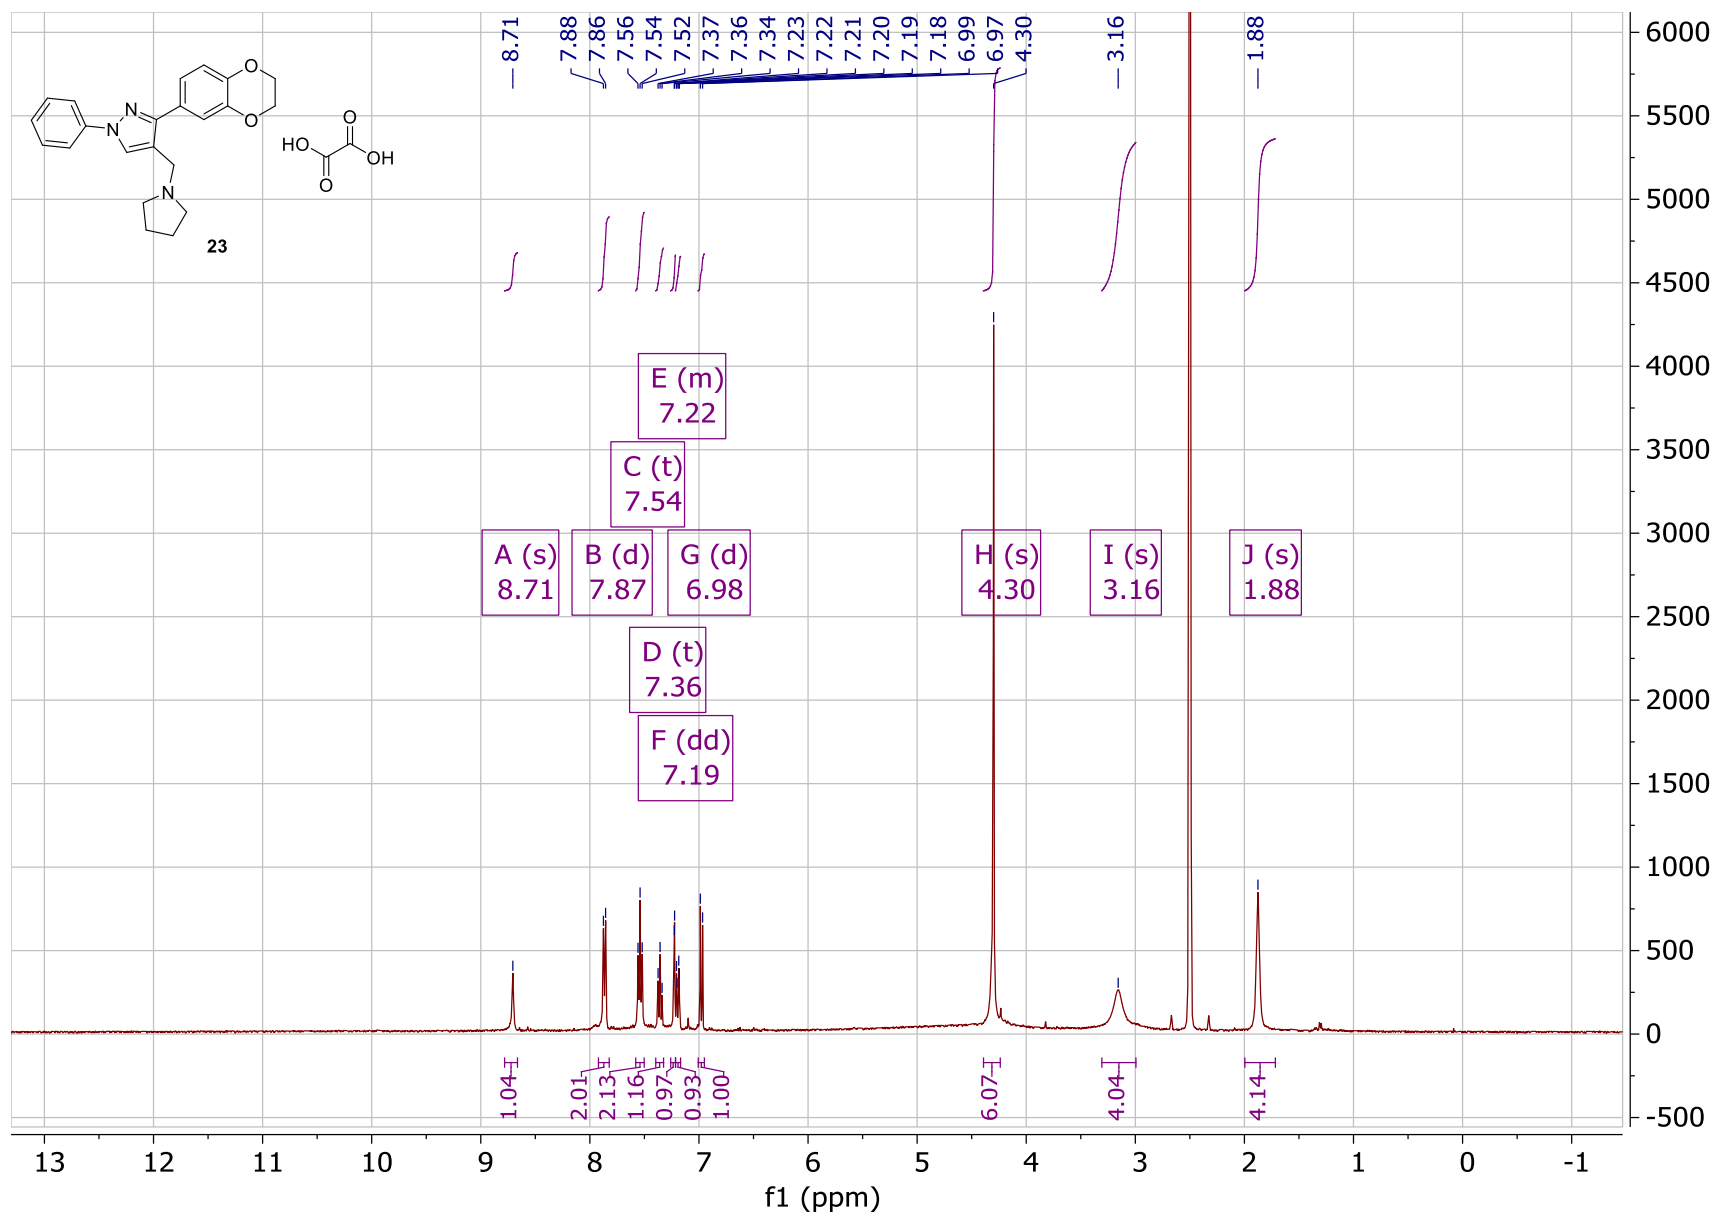

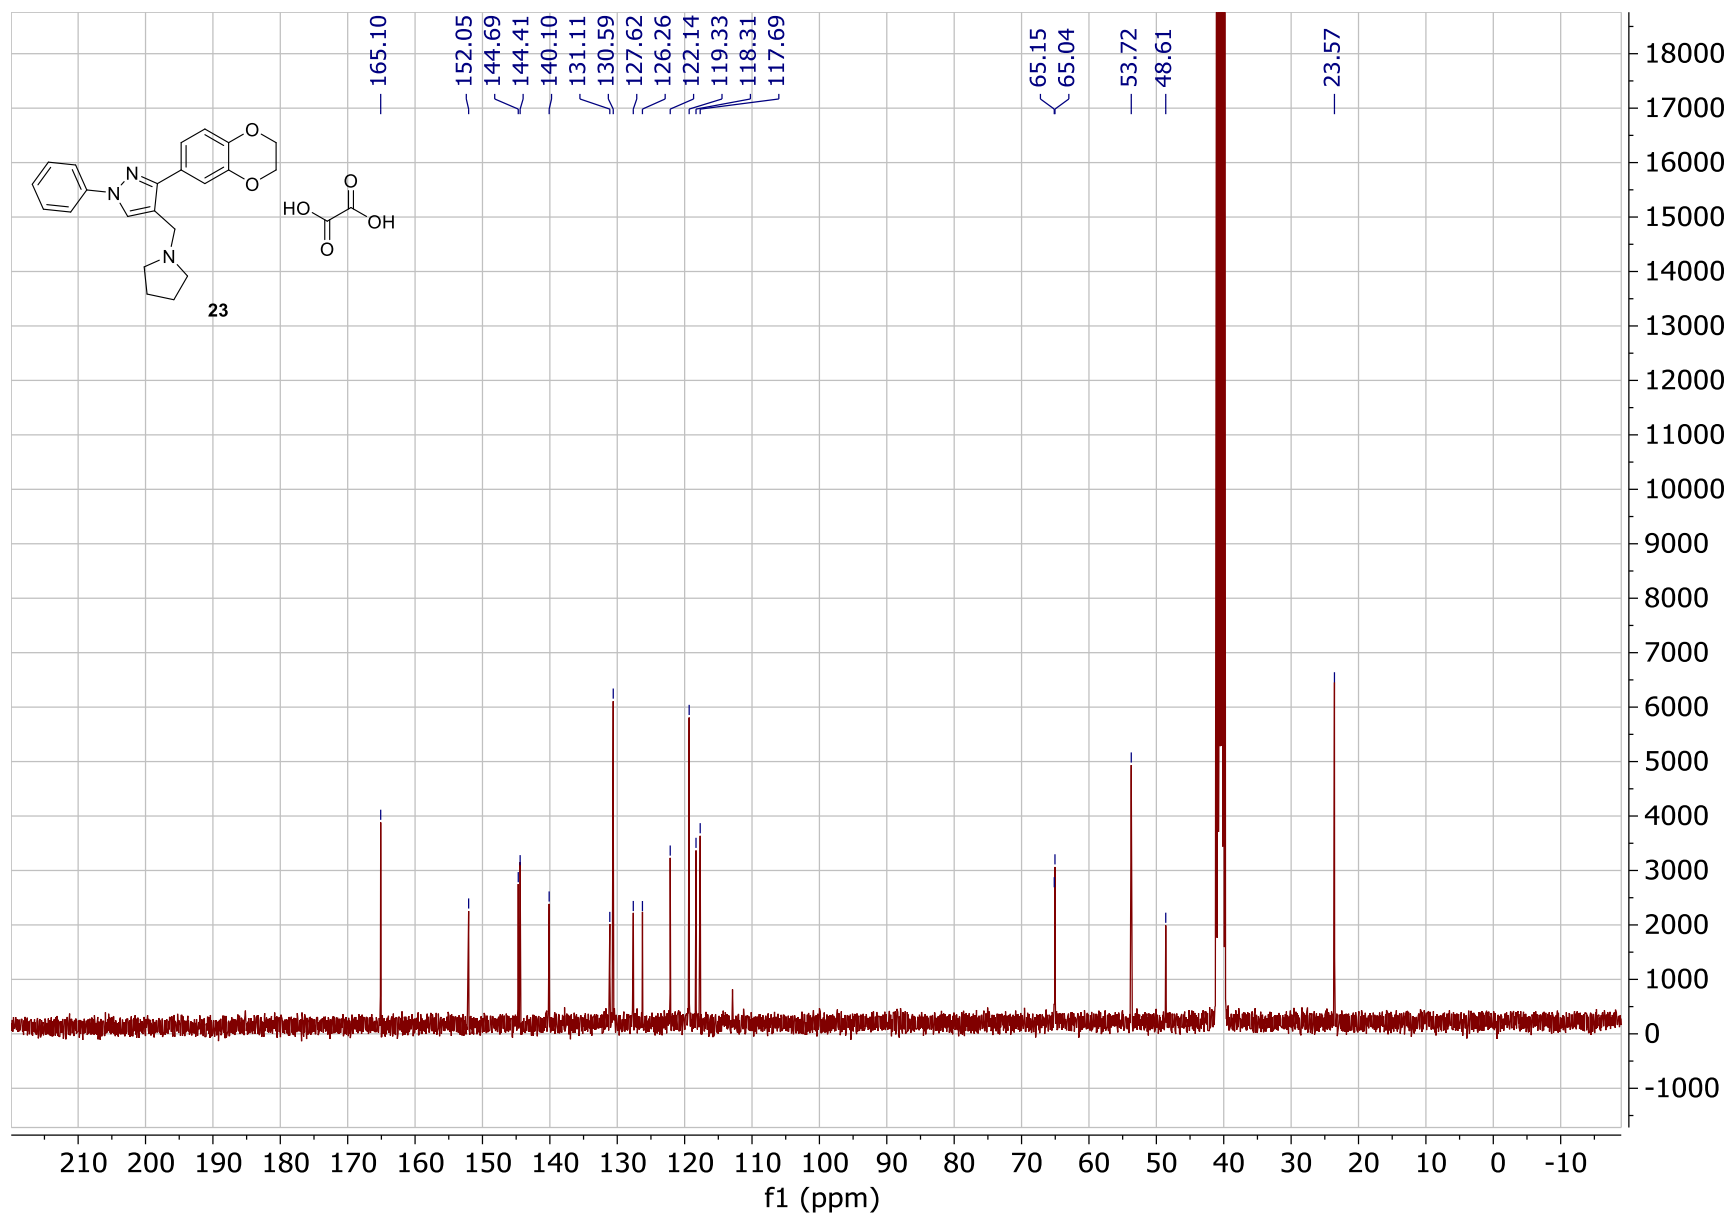

MB-2021-056HCl\_30.1.fid

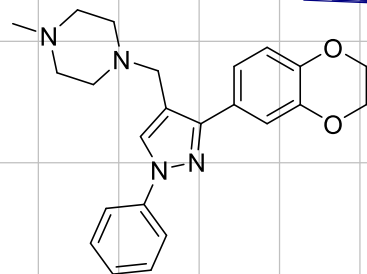

24

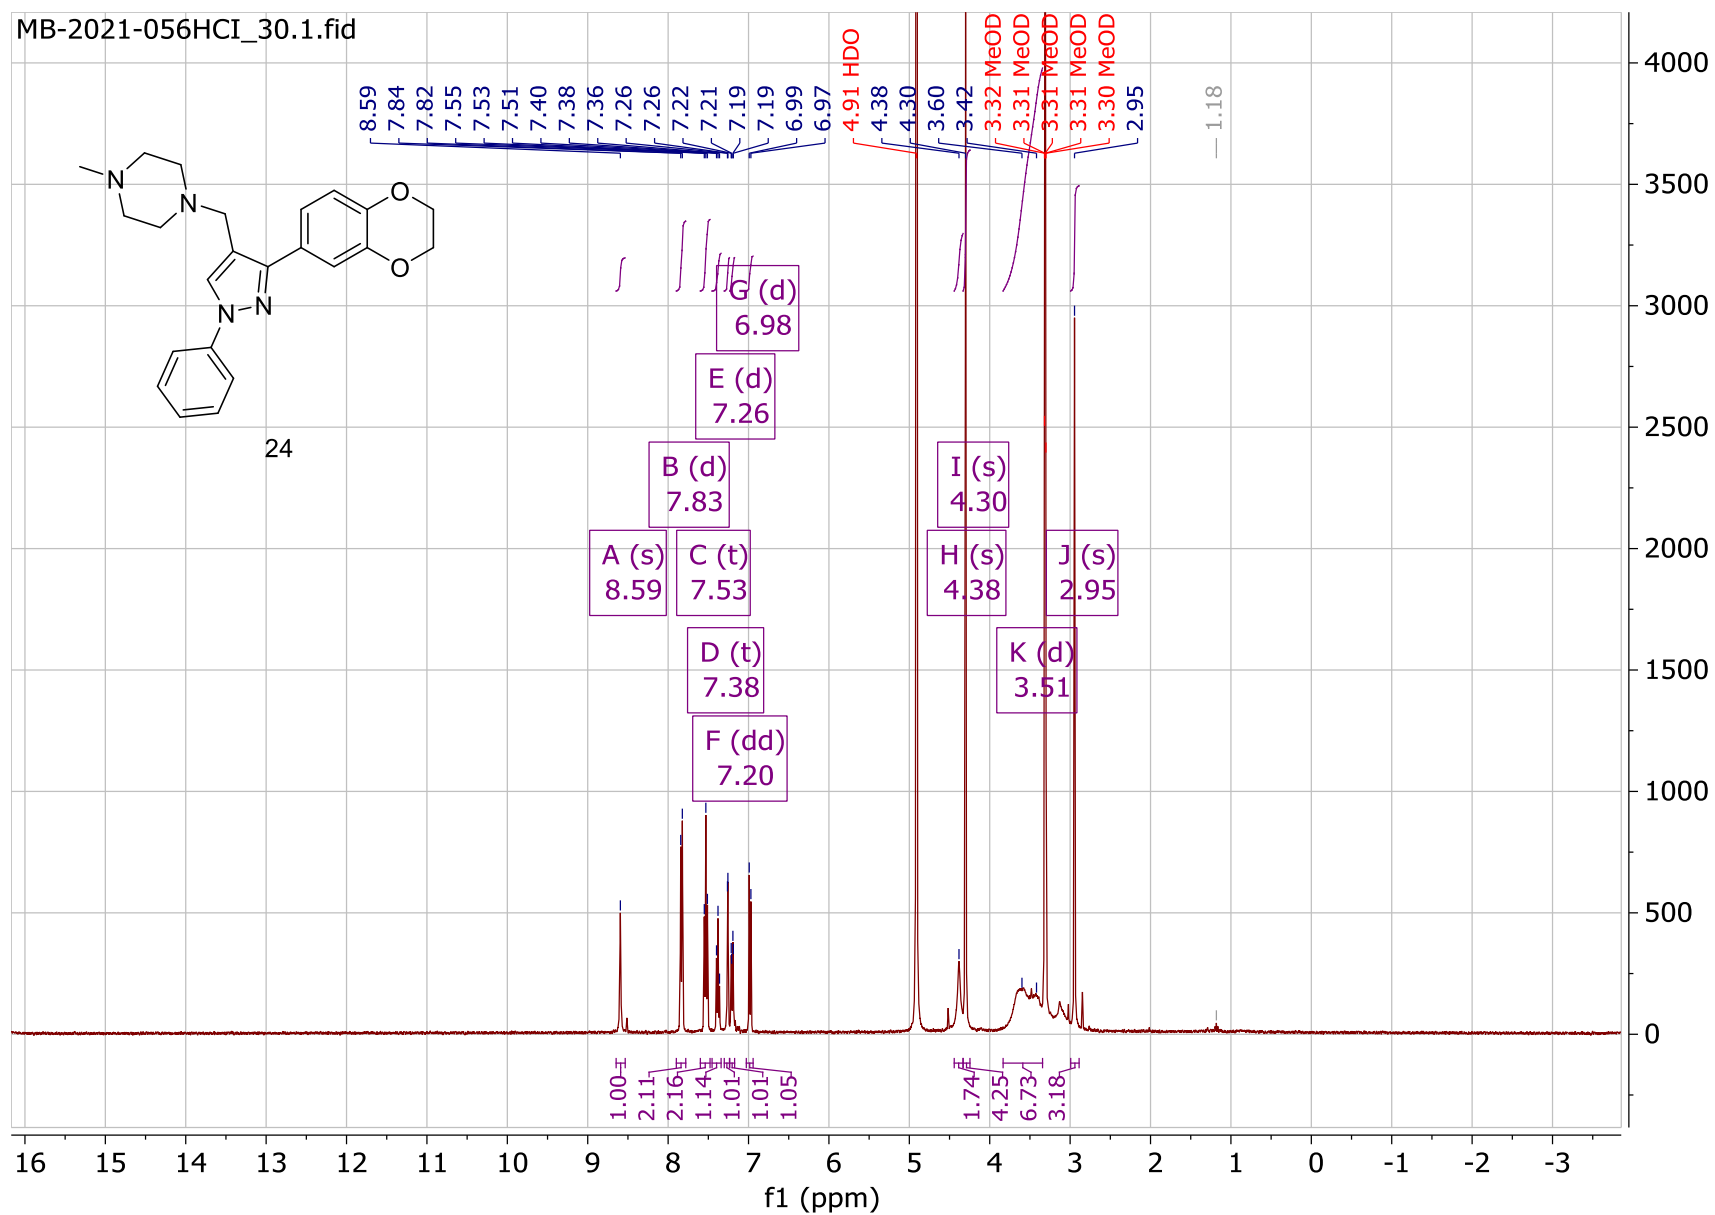

MB-2021-056HCl.31.fid

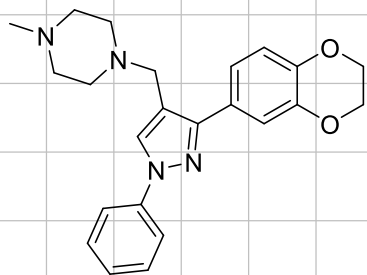

24

— 154.35  
145.88  
145.38  
140.90  
131.43  
130.72  
122.78  
120.39  
118.57

65.80  
65.71

— 51.73

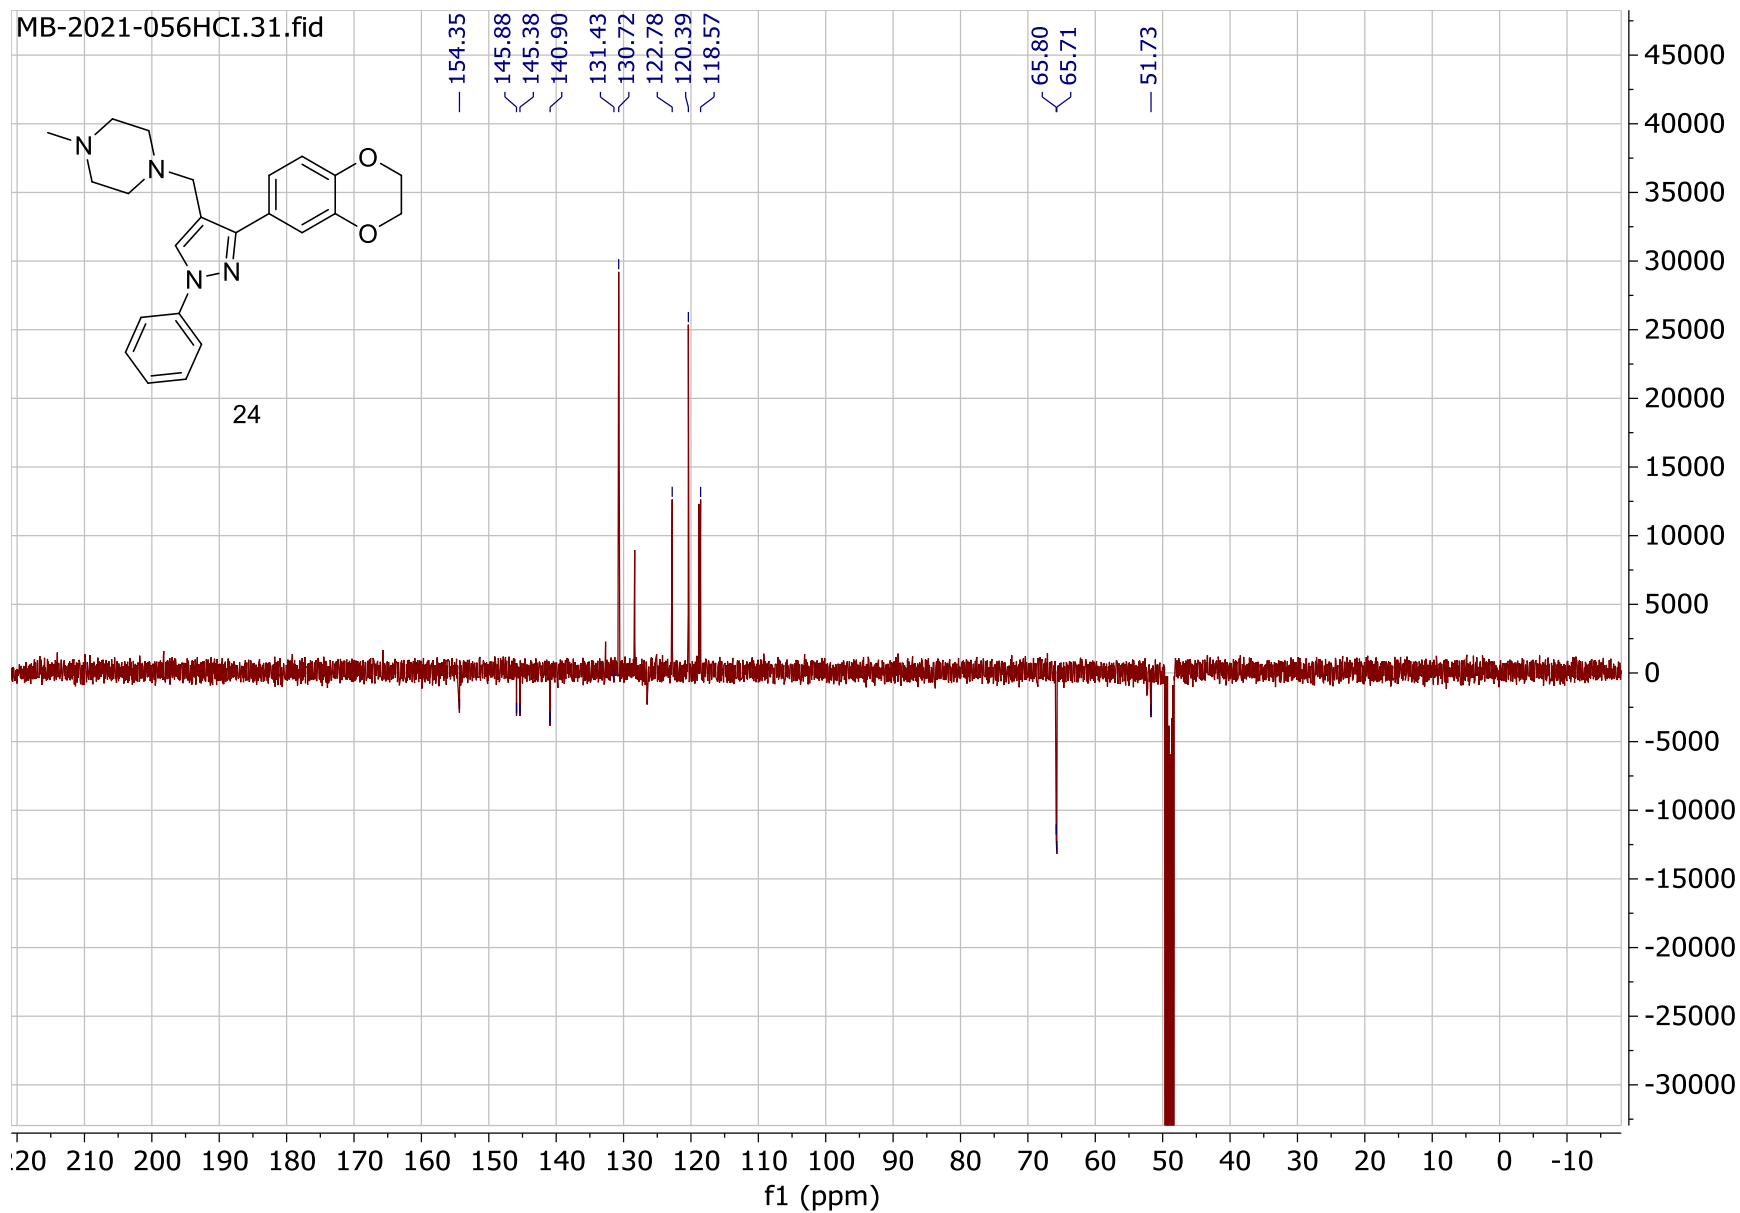

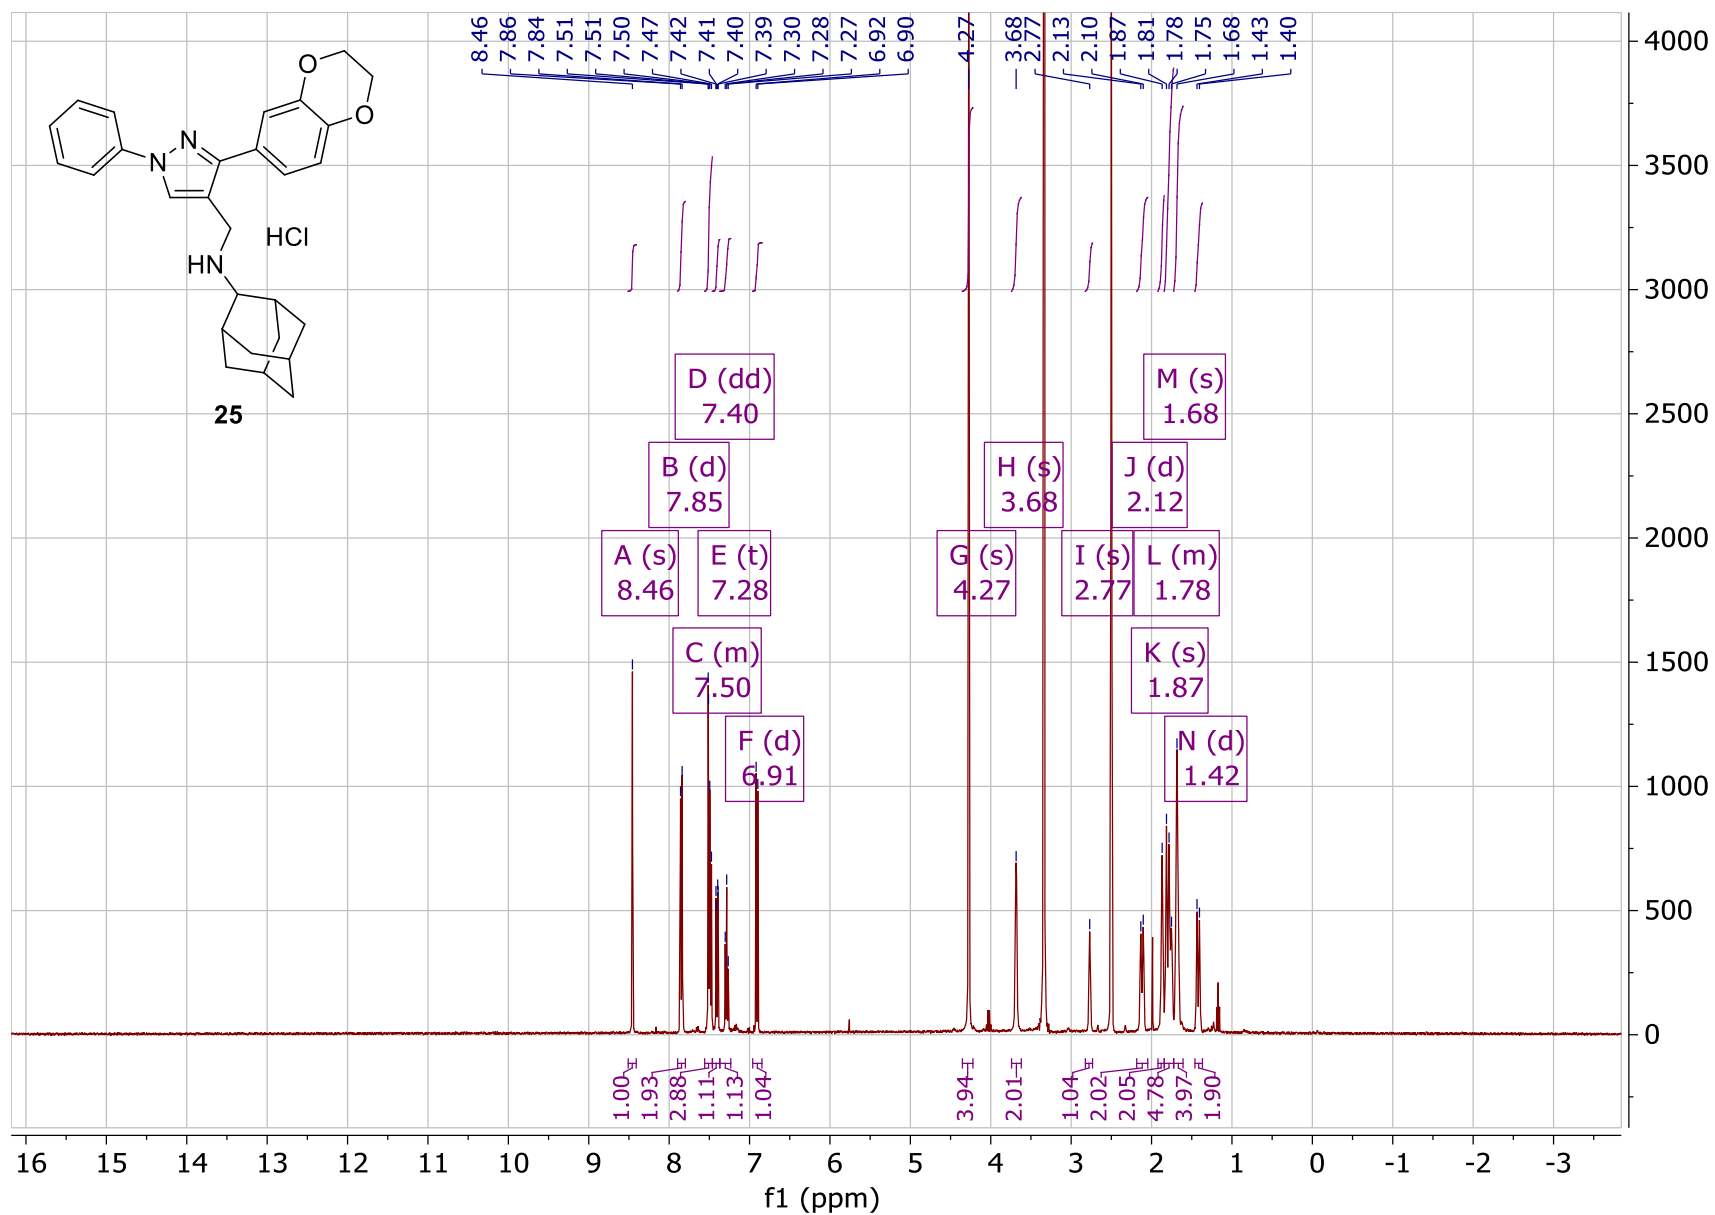

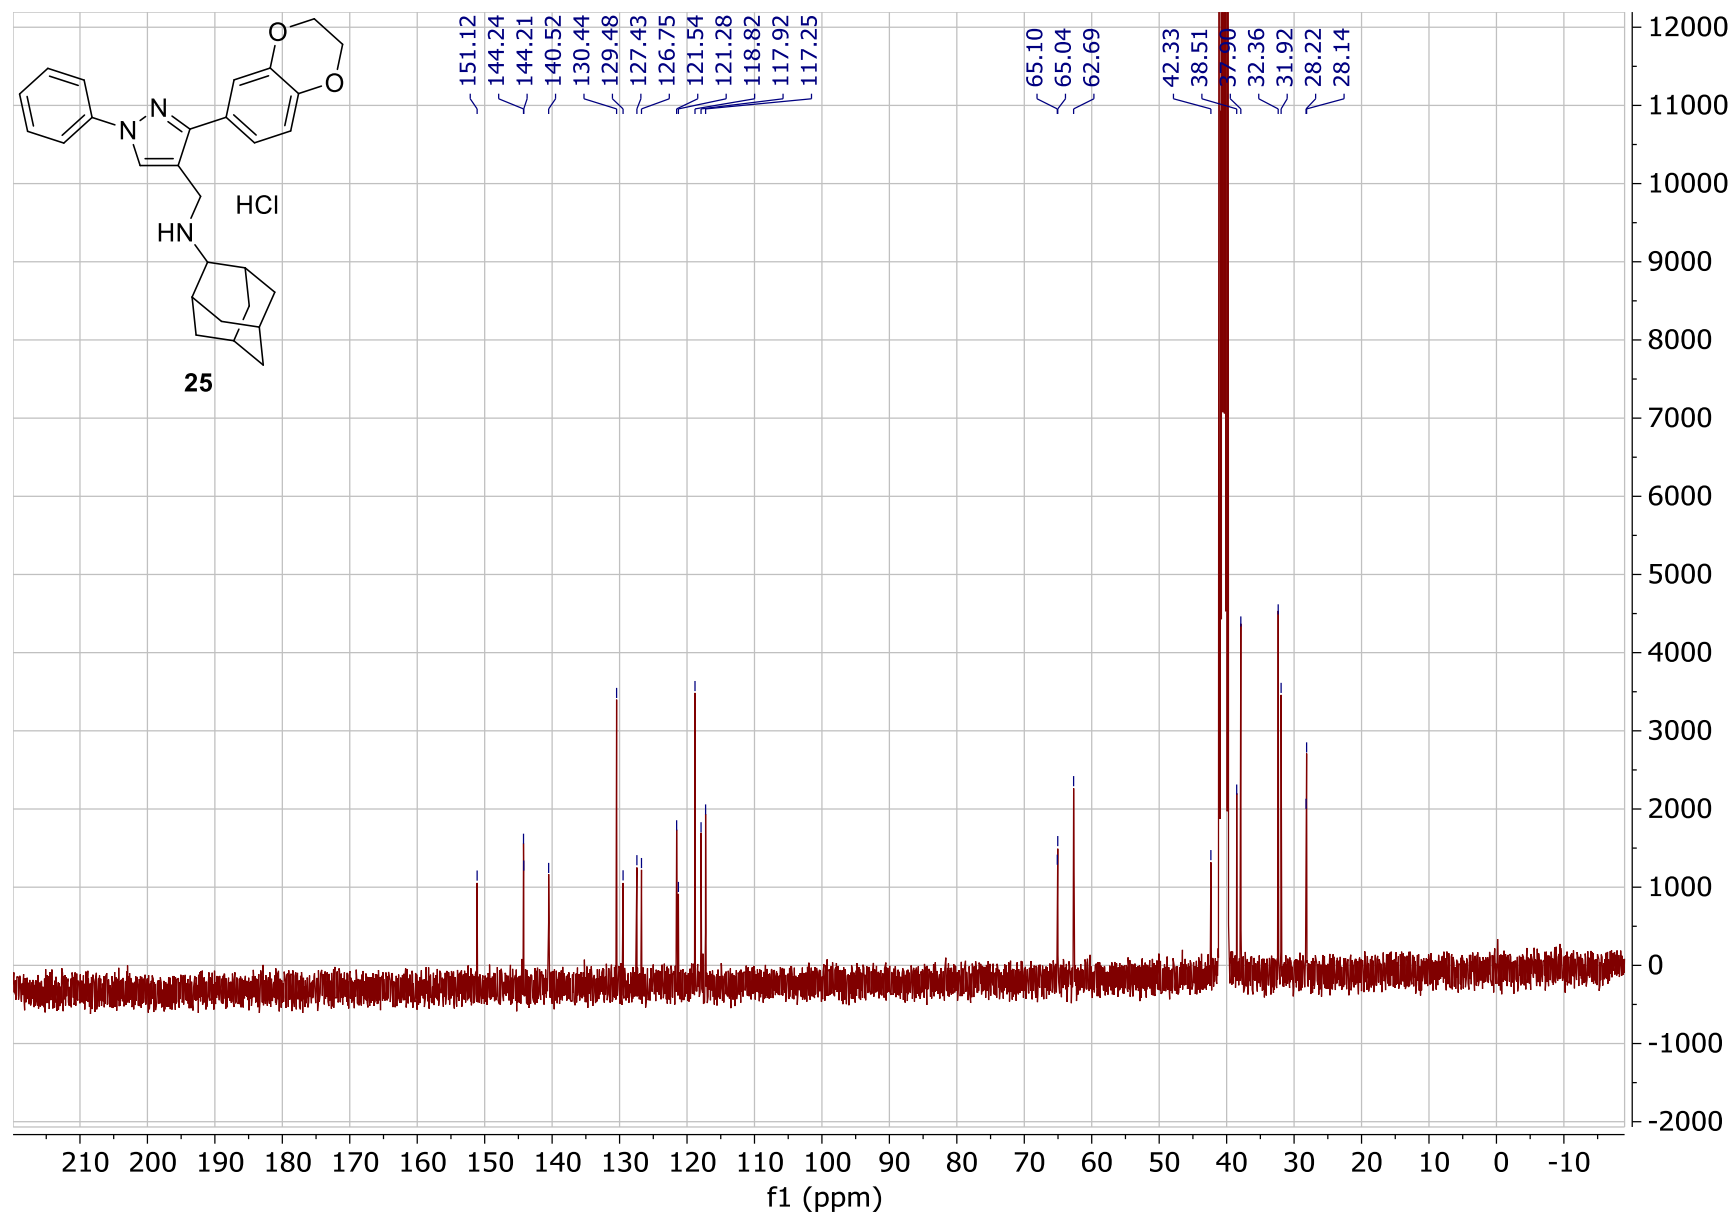

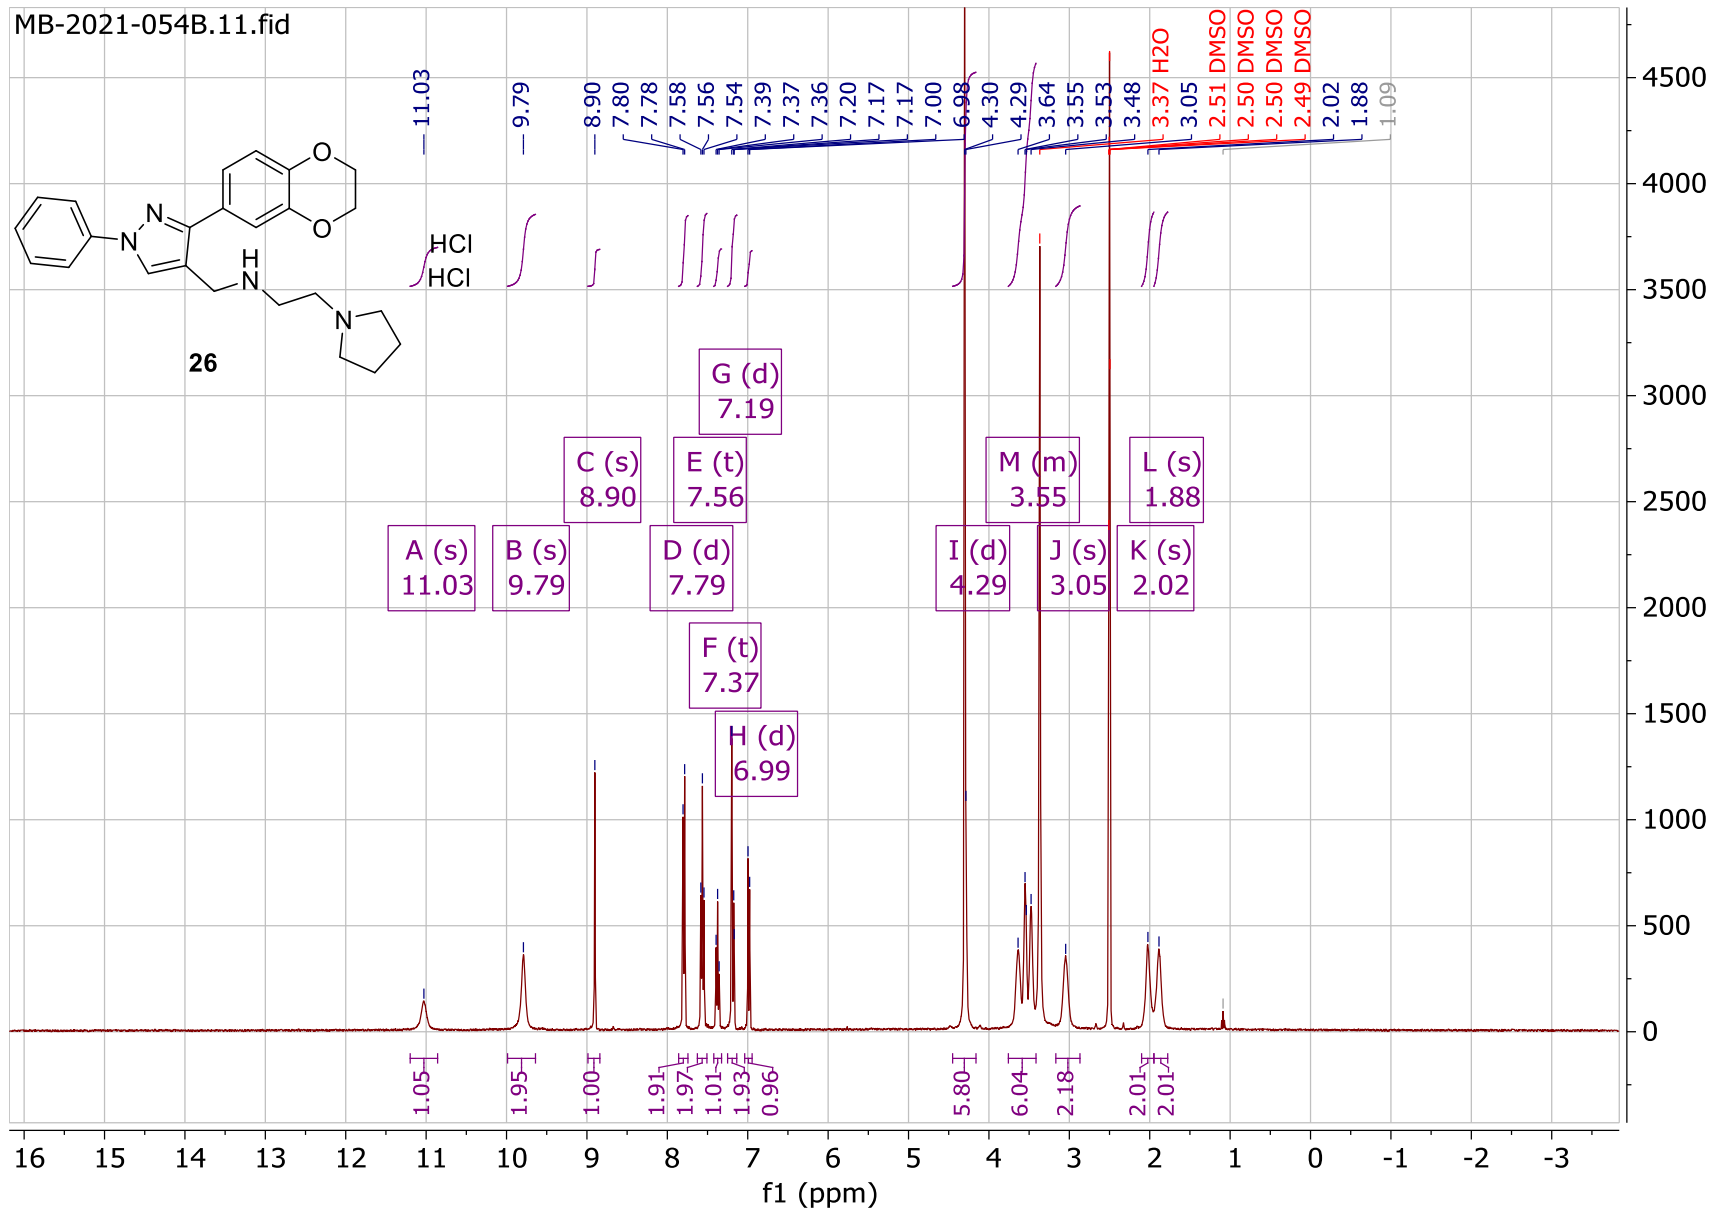



MB-2021-054B.12.fid

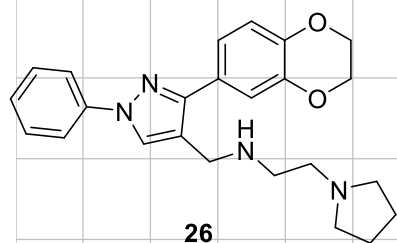

HCl  
HCl

151.56  
144.73  
144.42  
140.08  
130.79  
130.75  
127.74  
126.03  
122.13  
119.25  
118.29  
117.59  
112.81

65.15  
65.05

54.16  
50.47

43.36  
42.38

23.53

60000  
55000  
50000  
45000  
40000  
35000  
30000  
25000  
20000  
15000  
10000  
5000  
0  
-5000

210 200 190 180 170 160 150 140 130 120 110 100 90 80 70 60 50 40 30 20 10 0 -10

f1 (ppm)

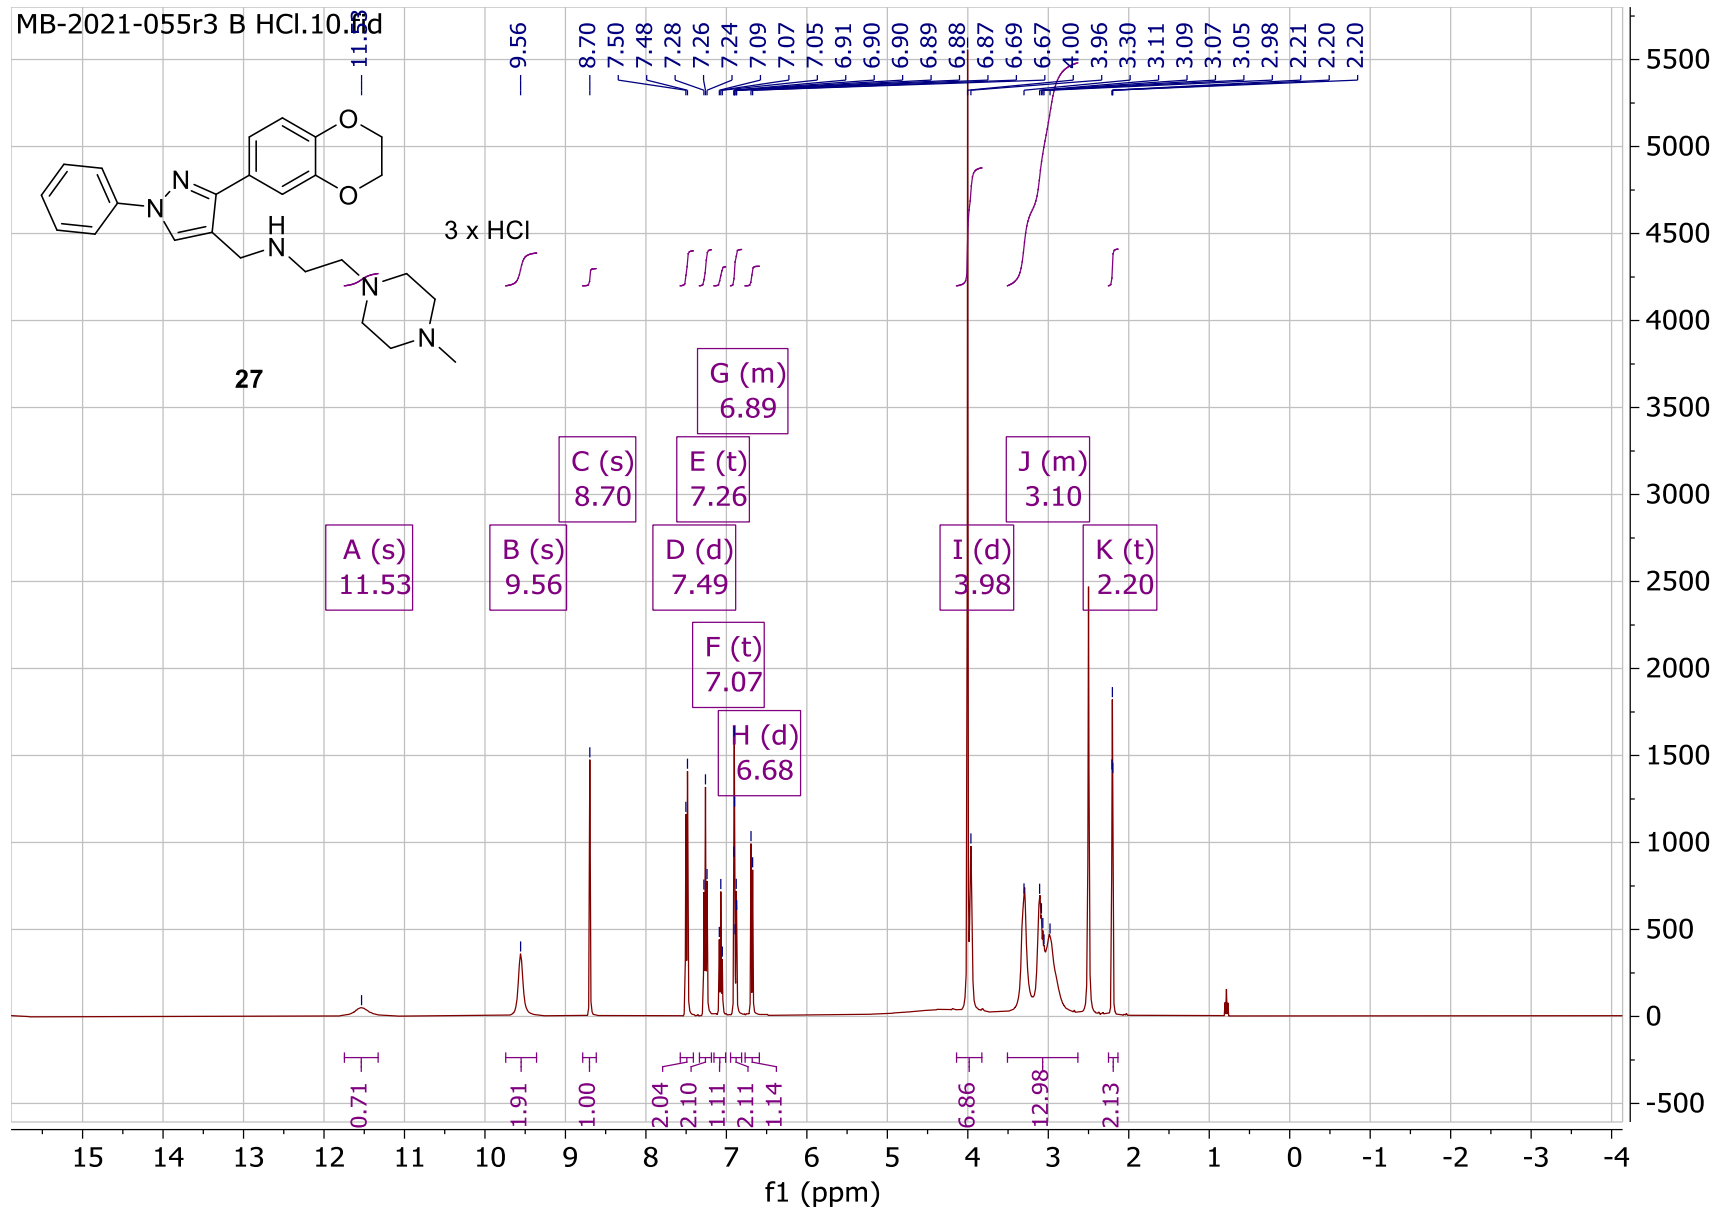

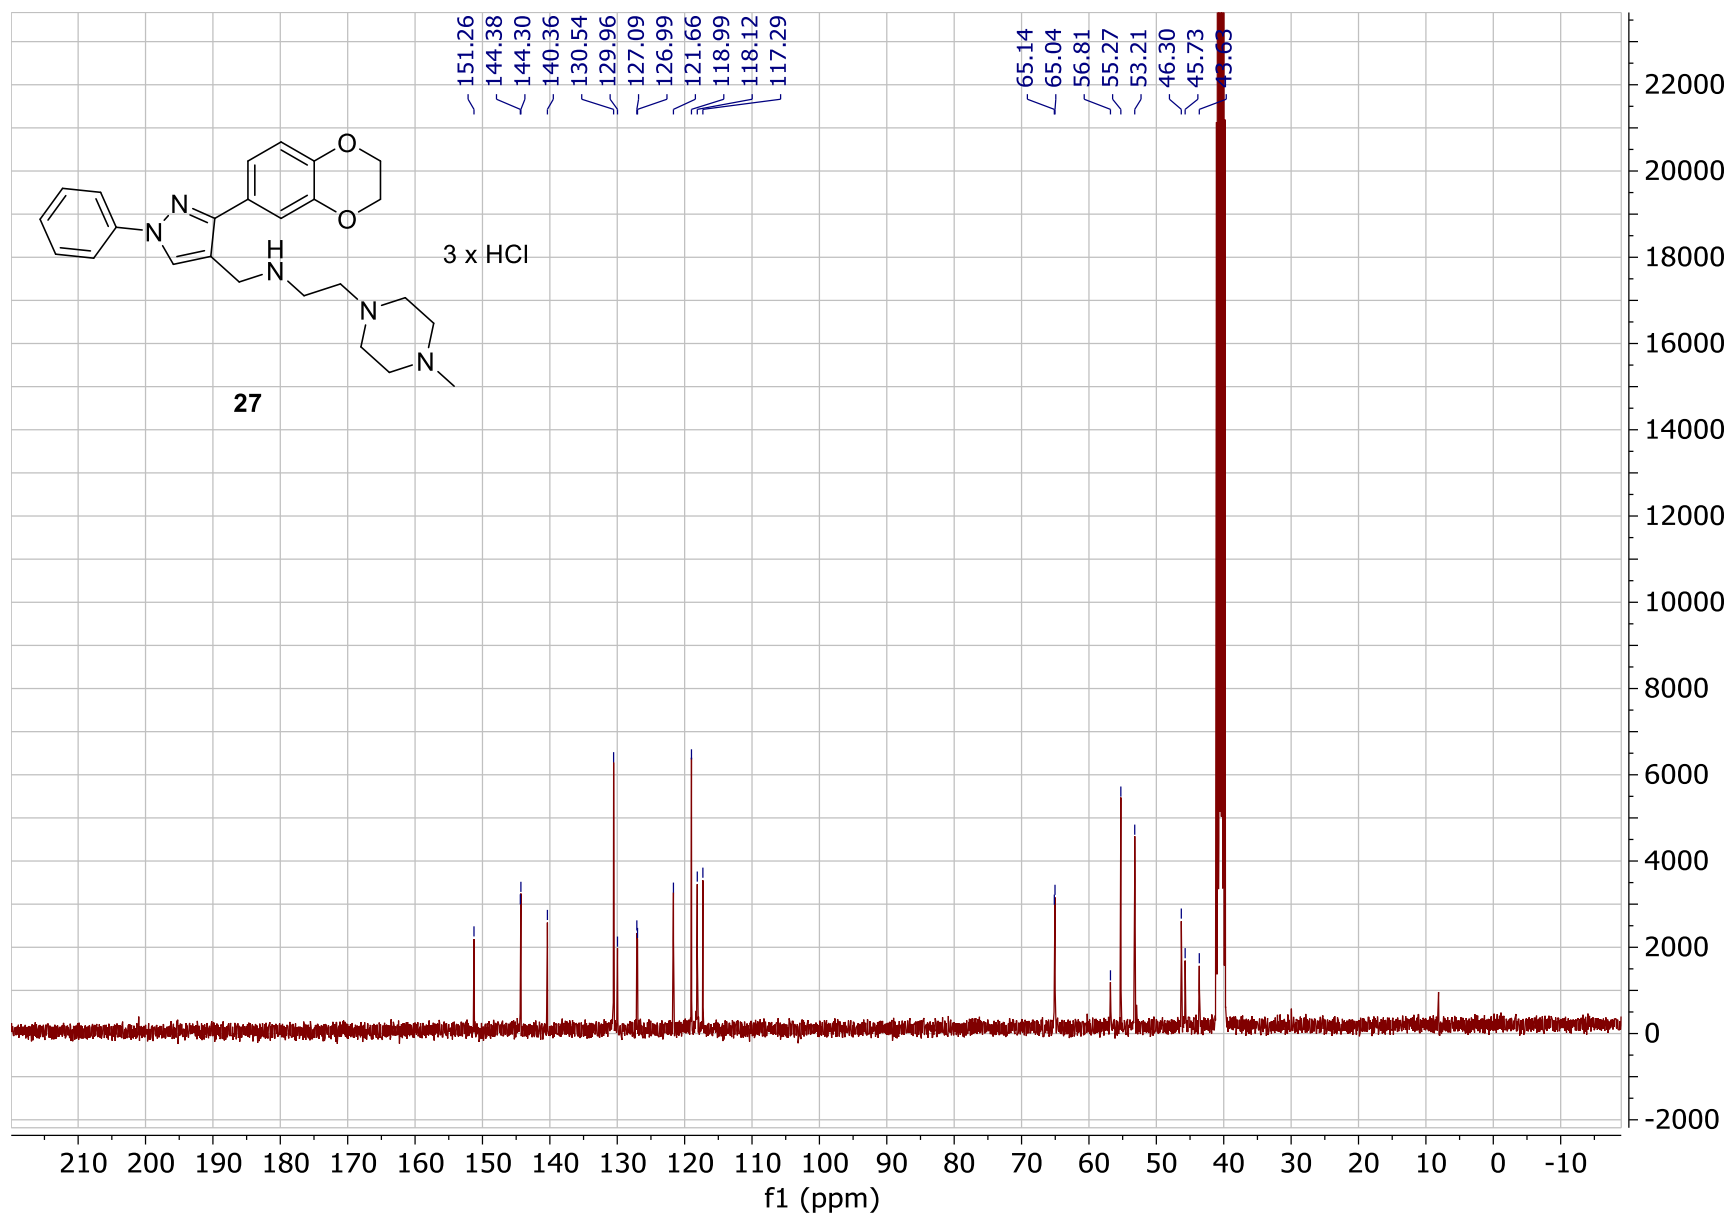

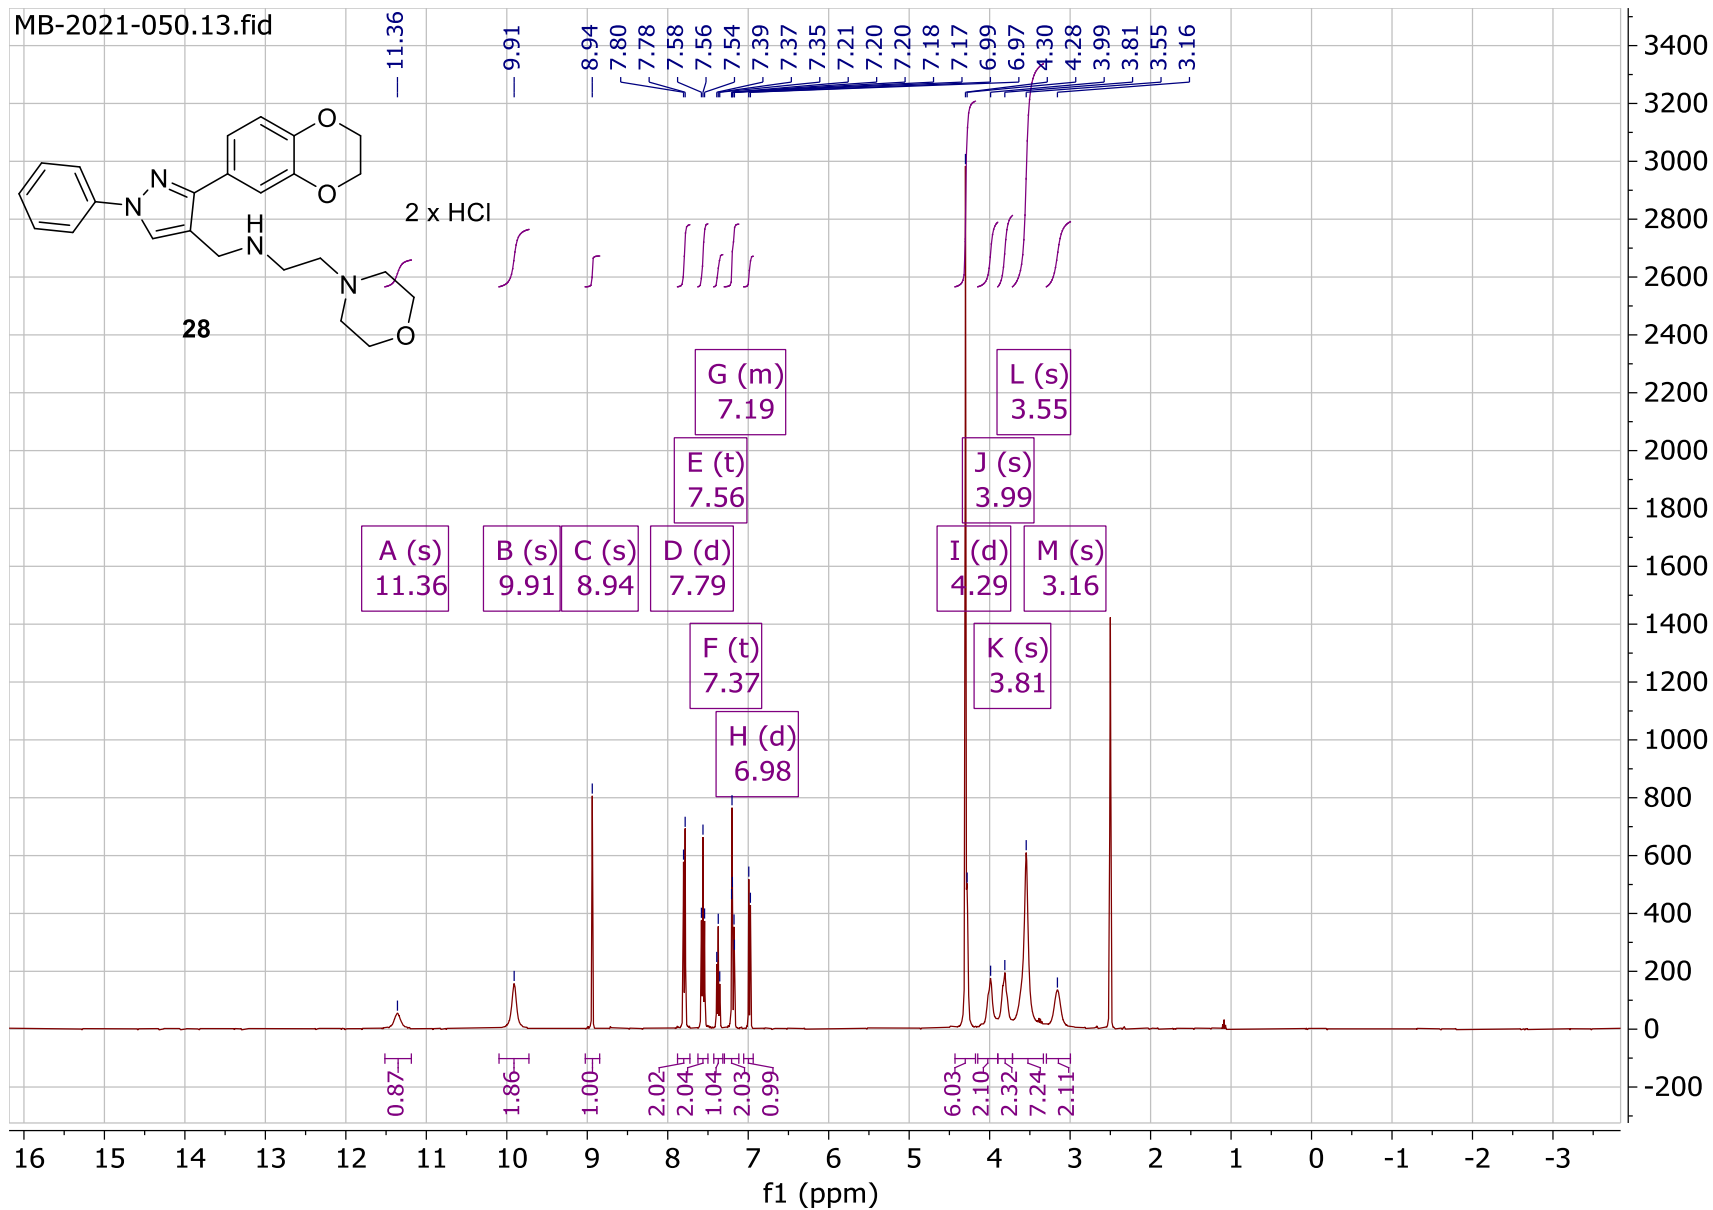

MB-2021-050.11.fid

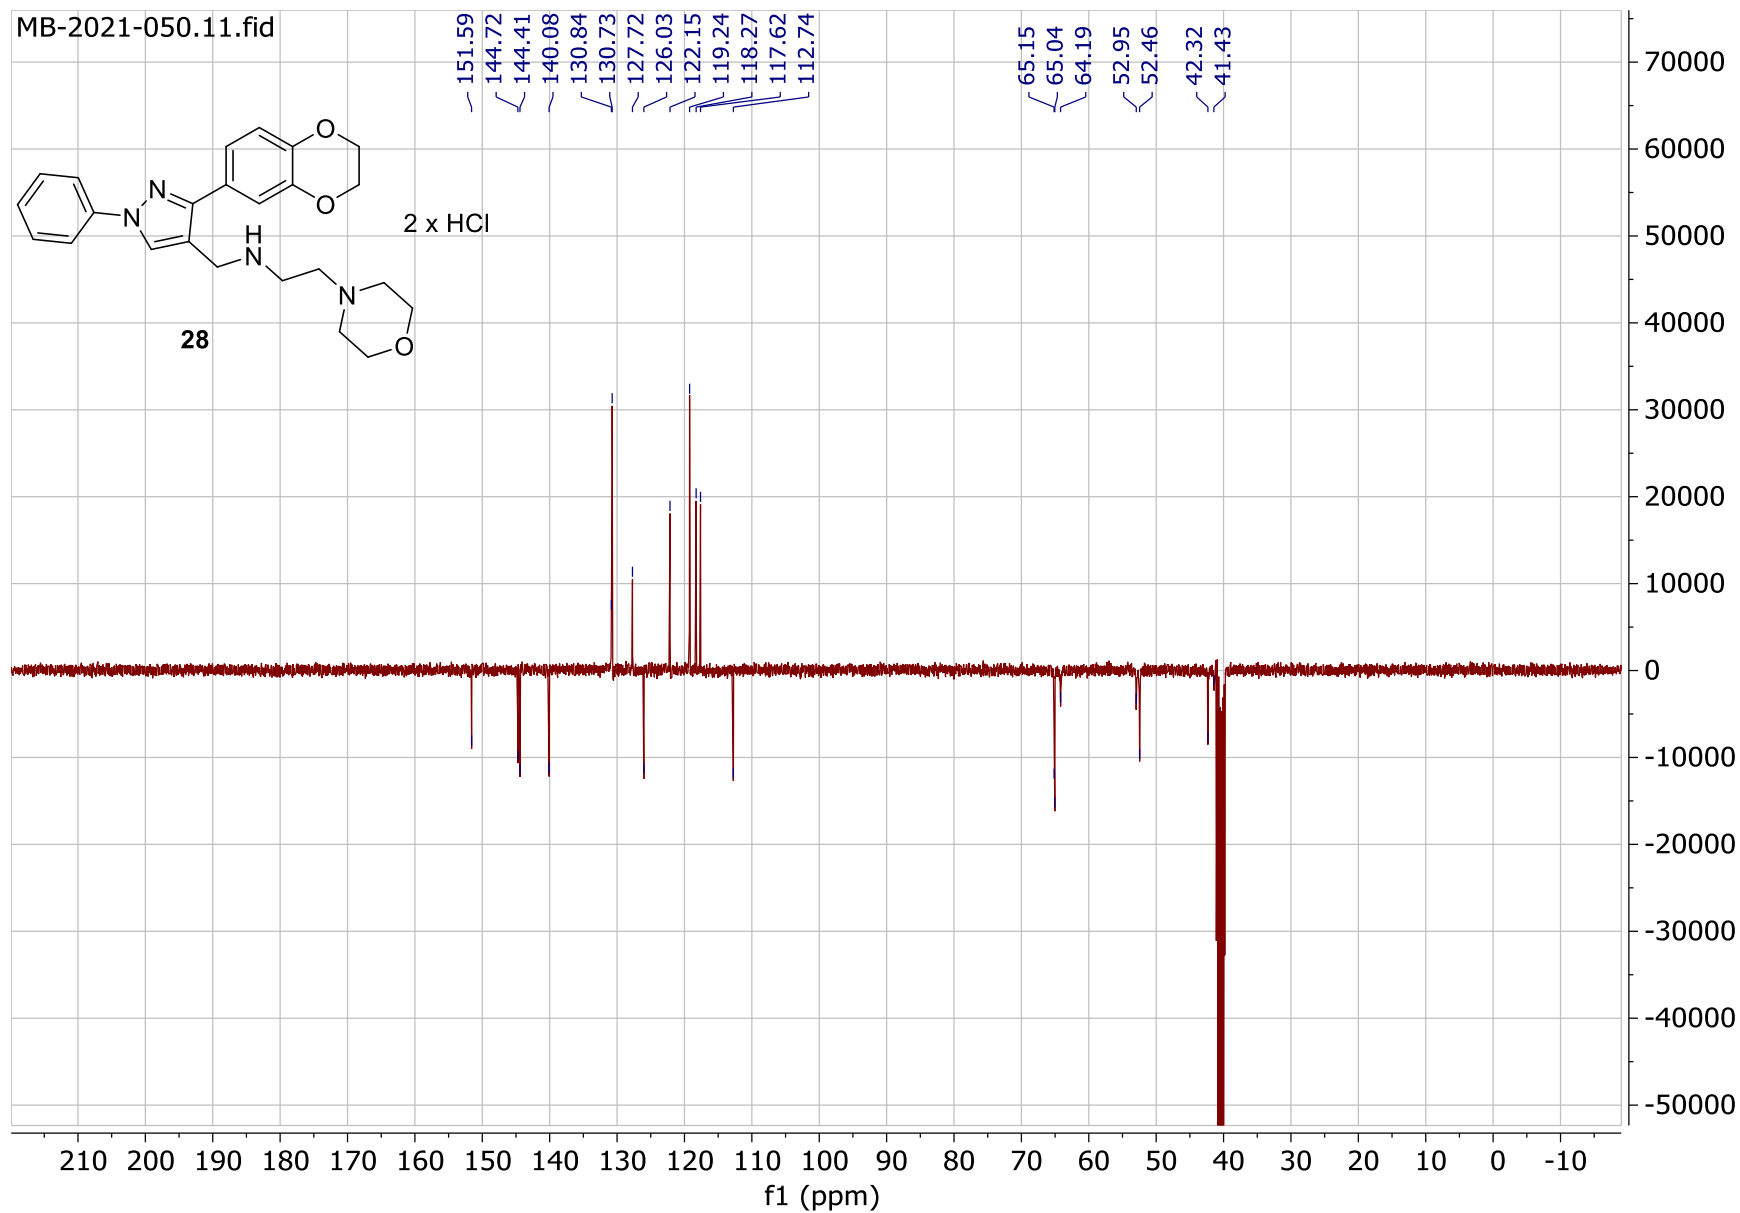

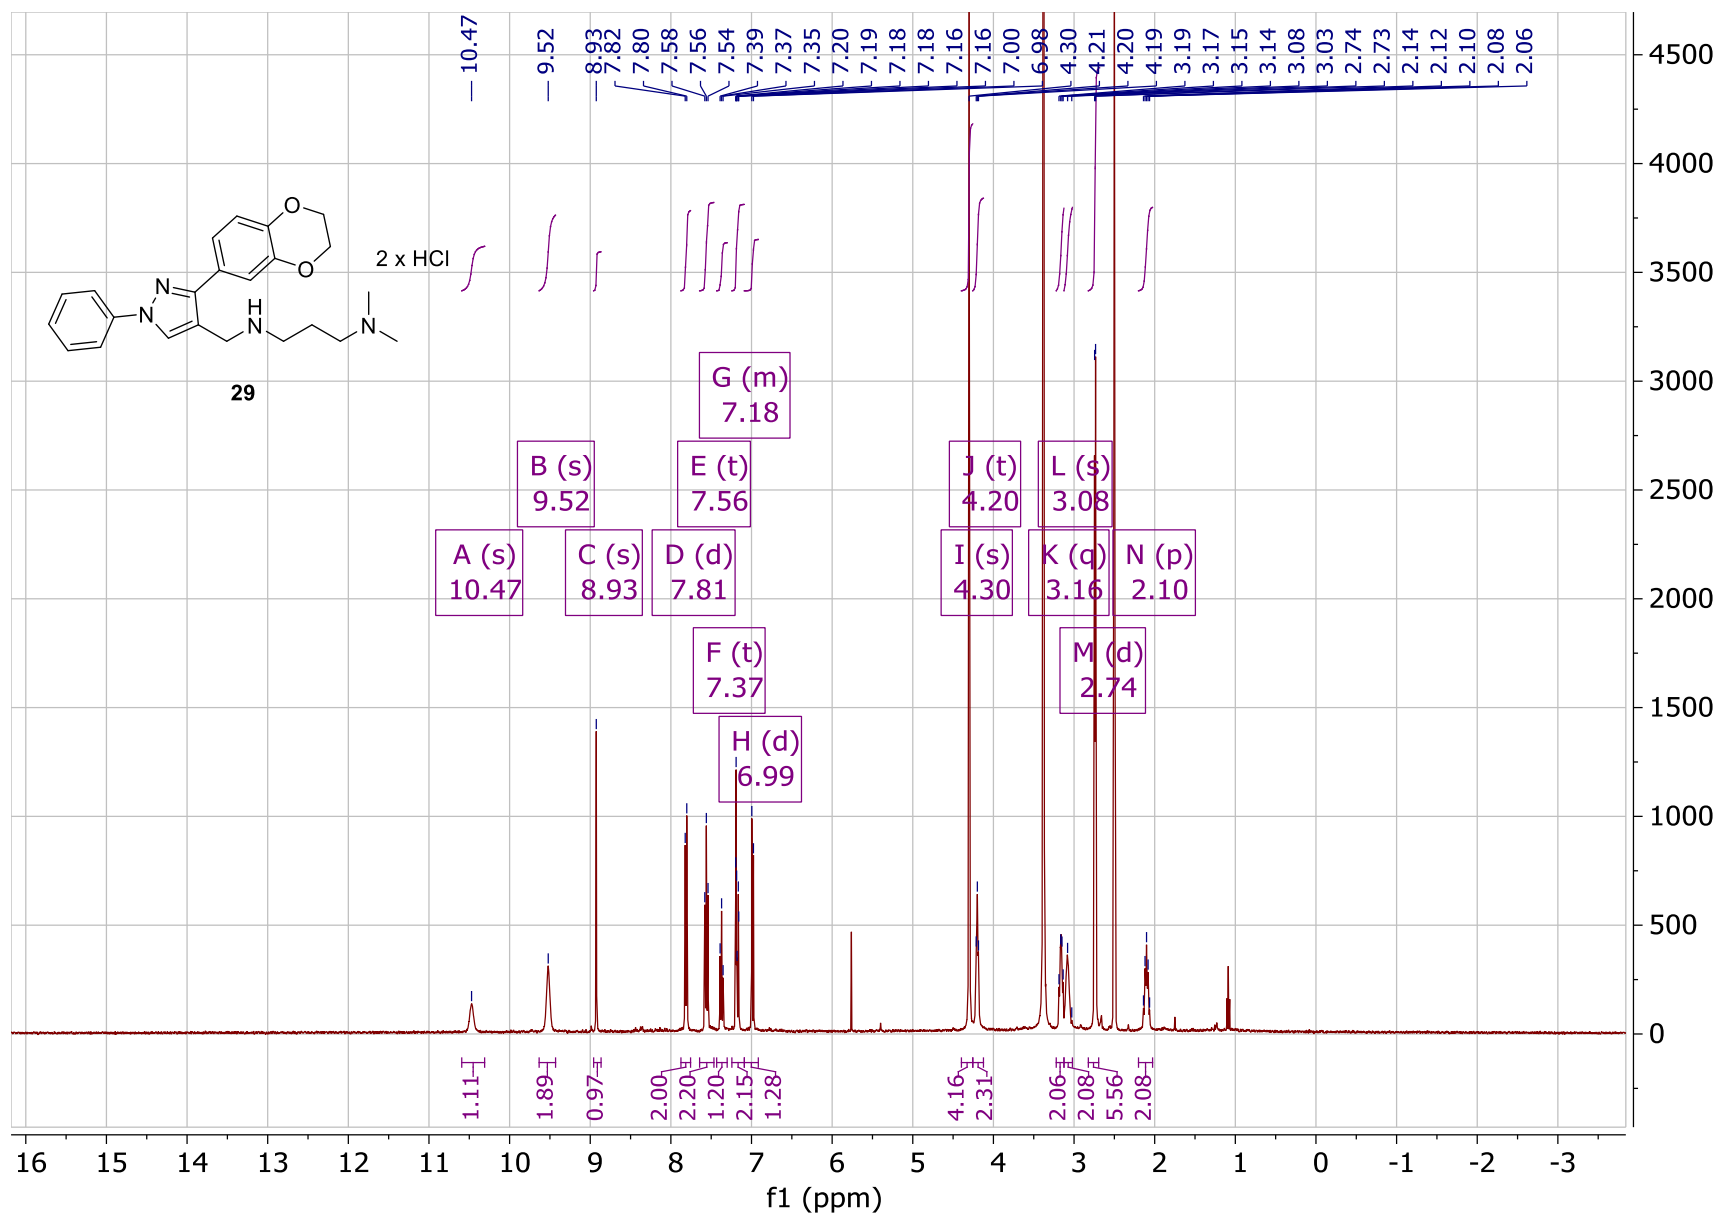

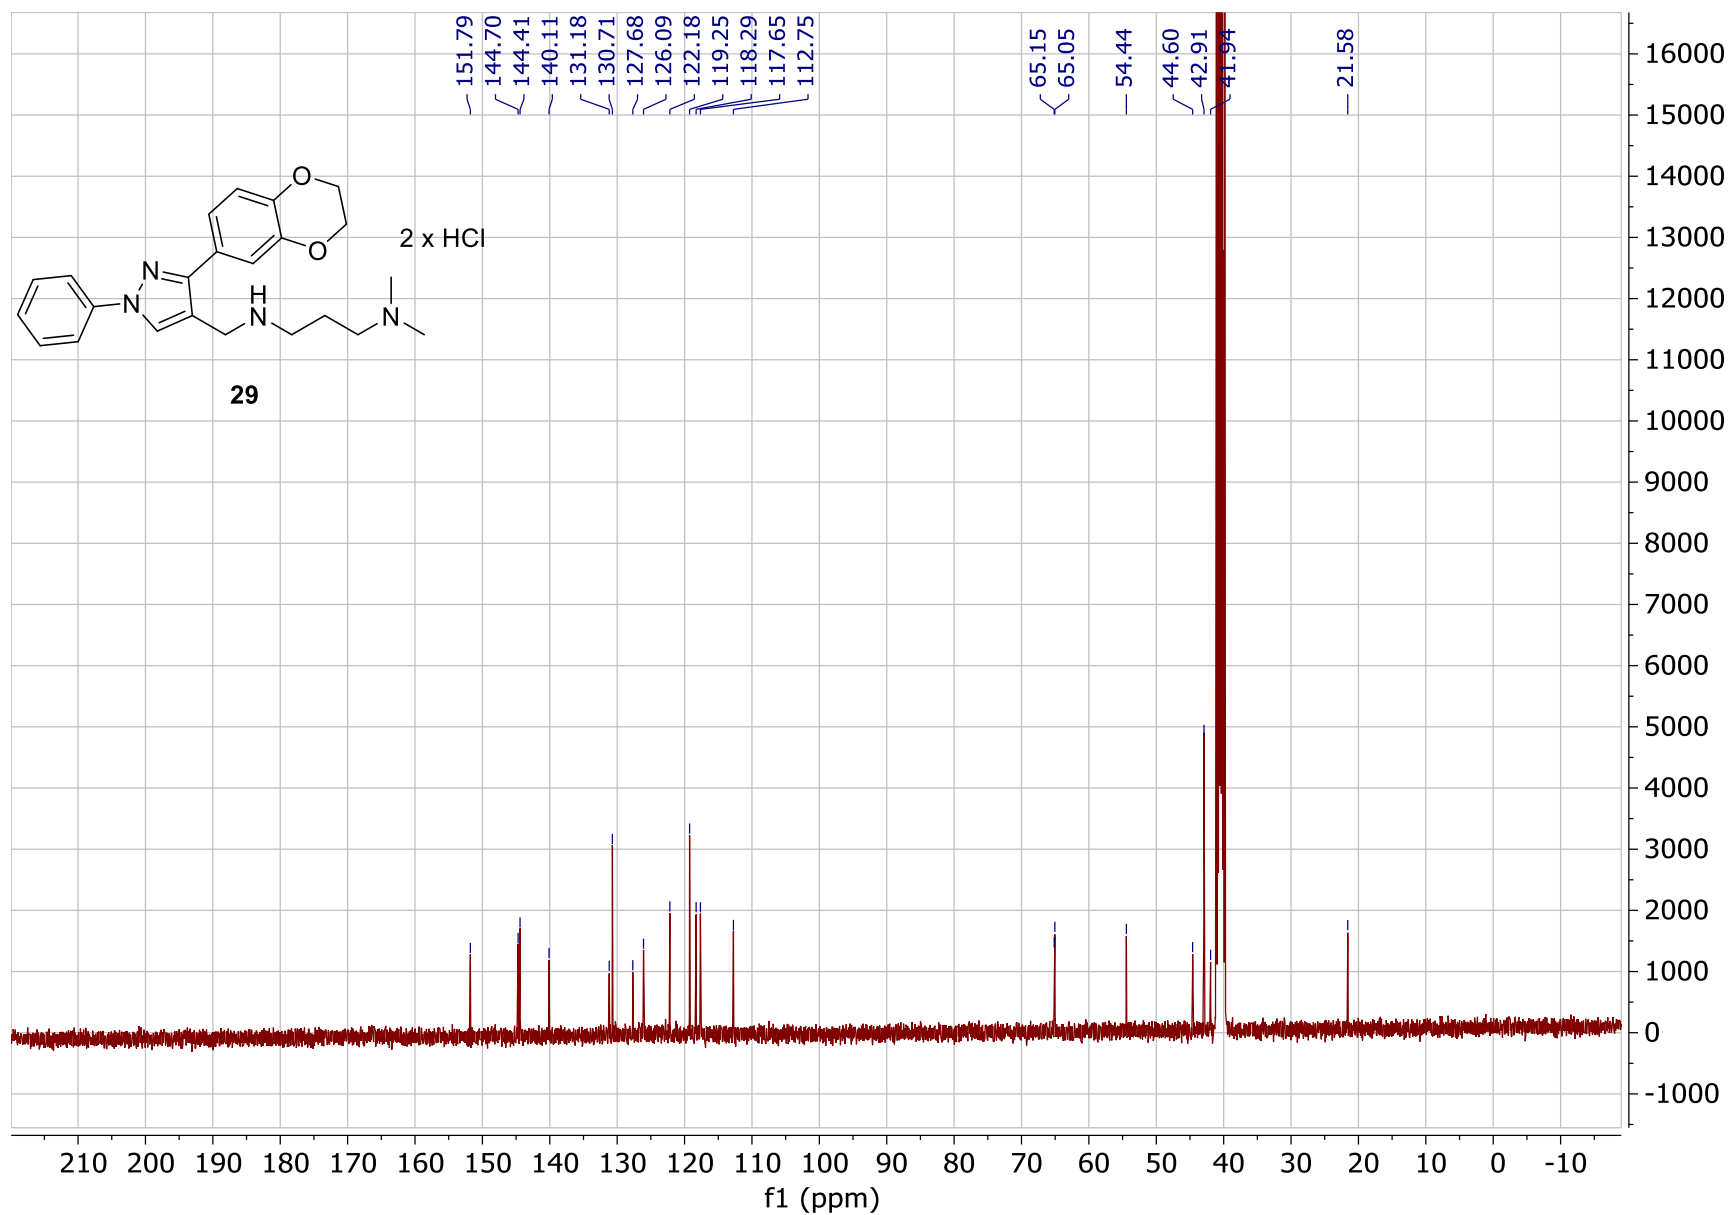

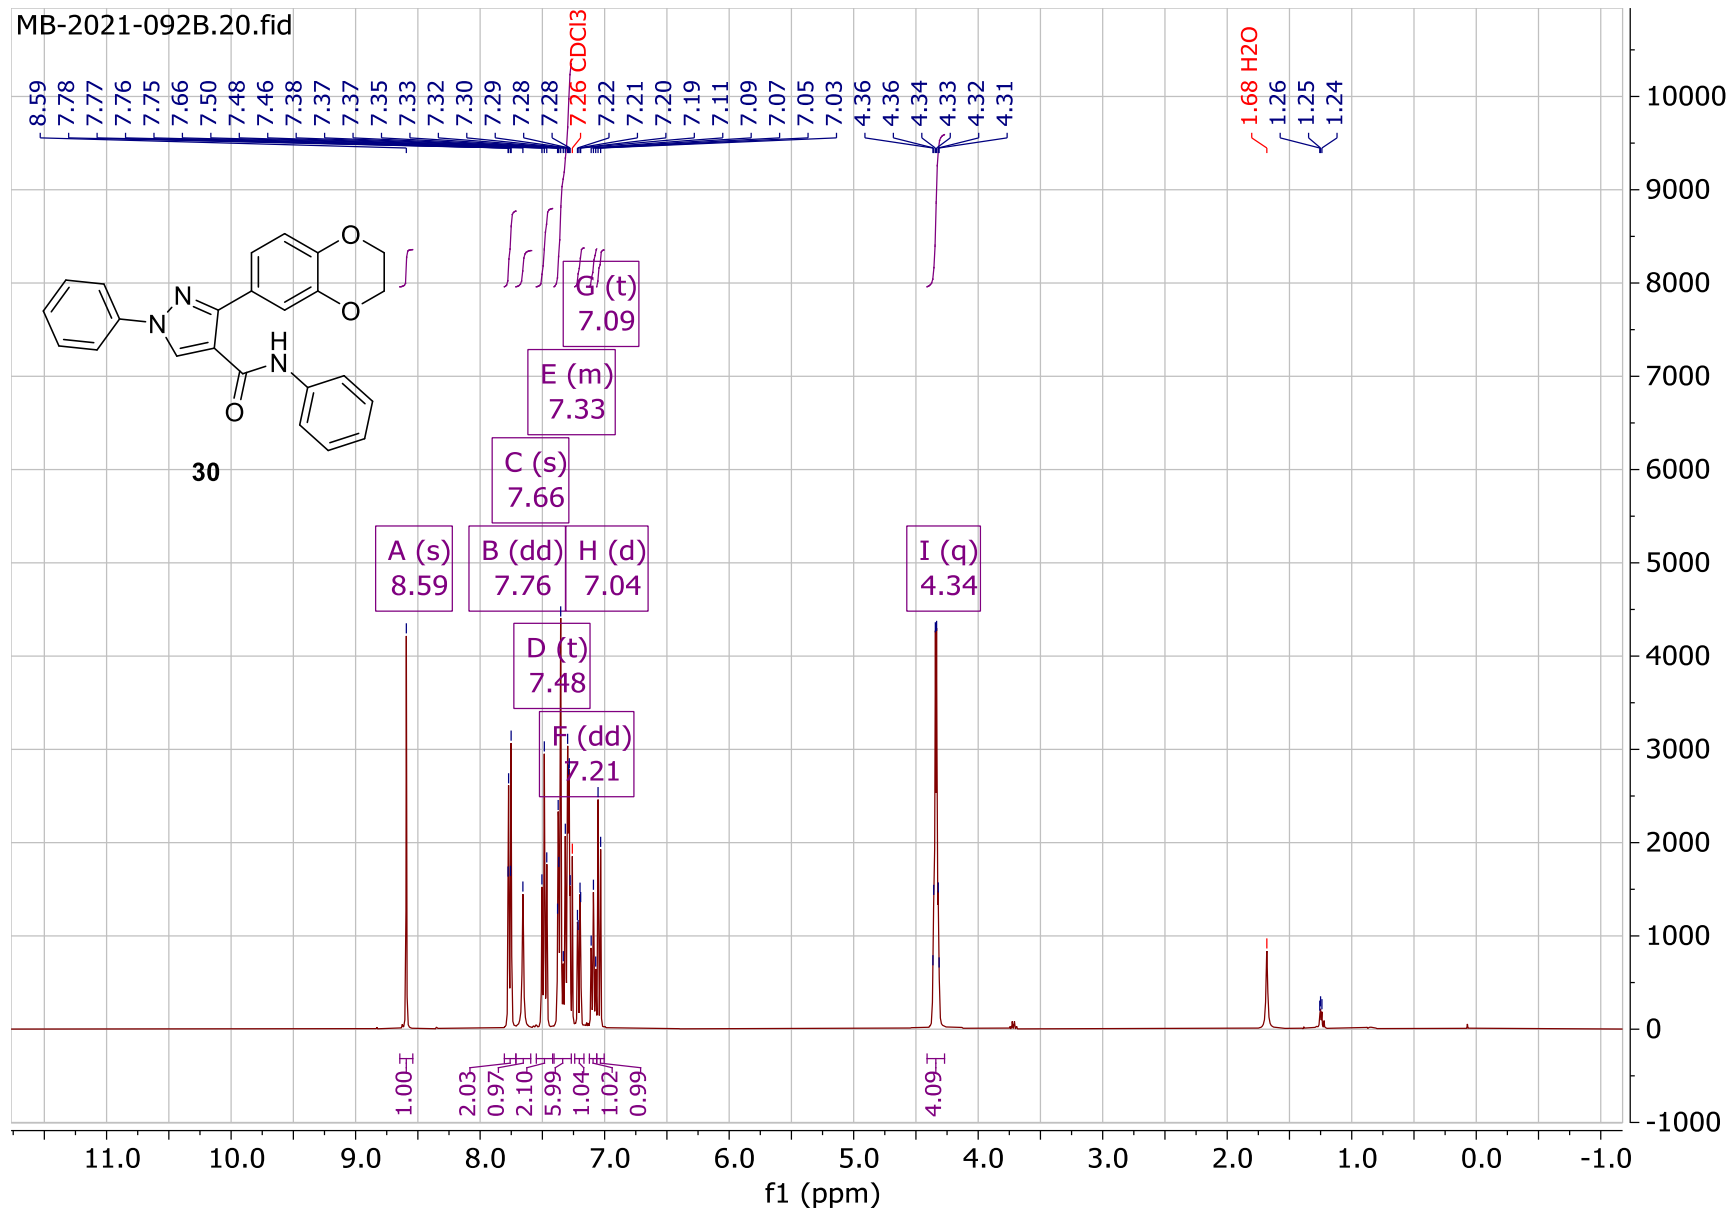



MB-2021-092B.11.fid

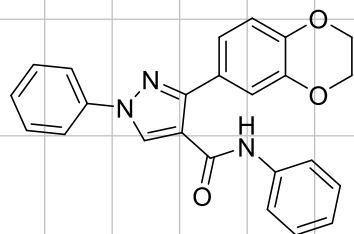

30

160.66  
150.39  
145.01  
144.28  
139.36  
137.90  
131.55  
129.70  
129.13  
127.51  
125.15  
124.34  
122.66  
119.82  
119.50  
118.77  
118.37  
118.06

64.68  
64.47

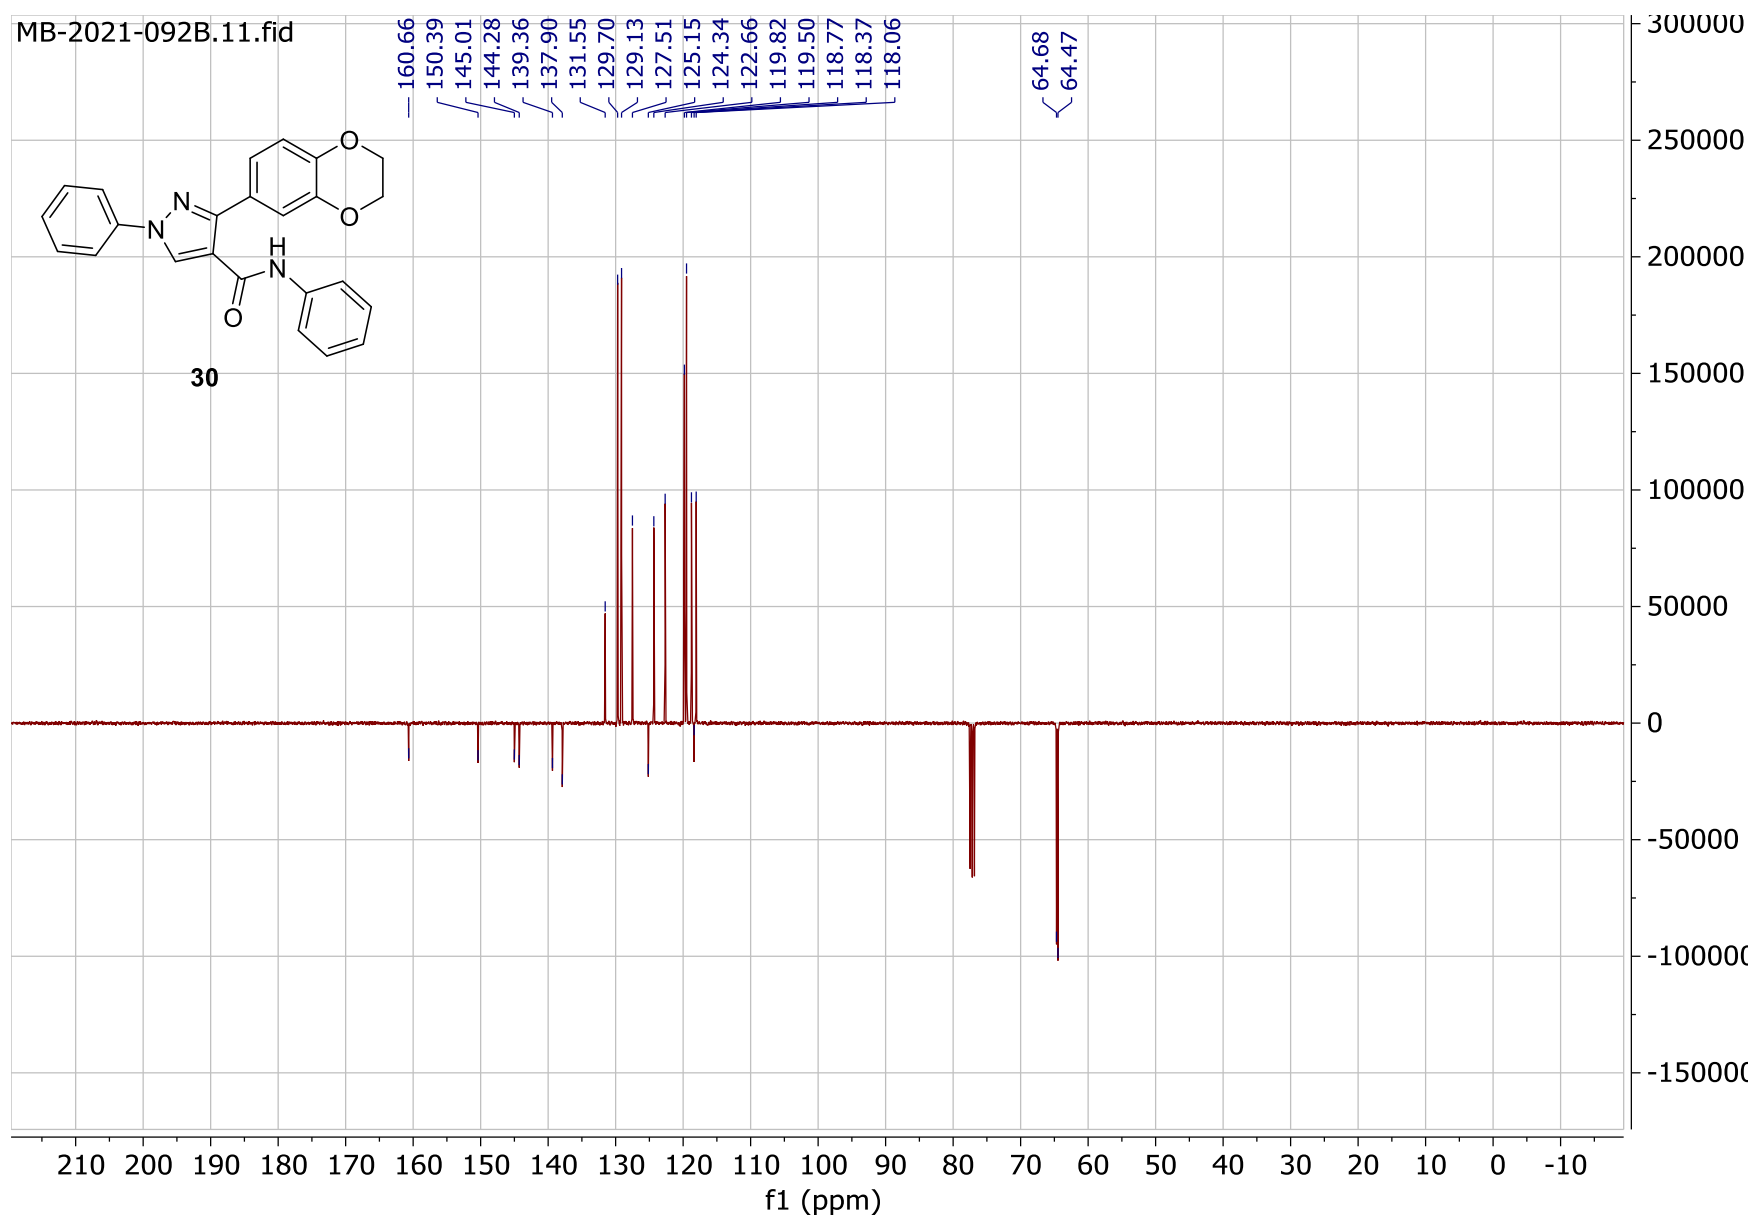

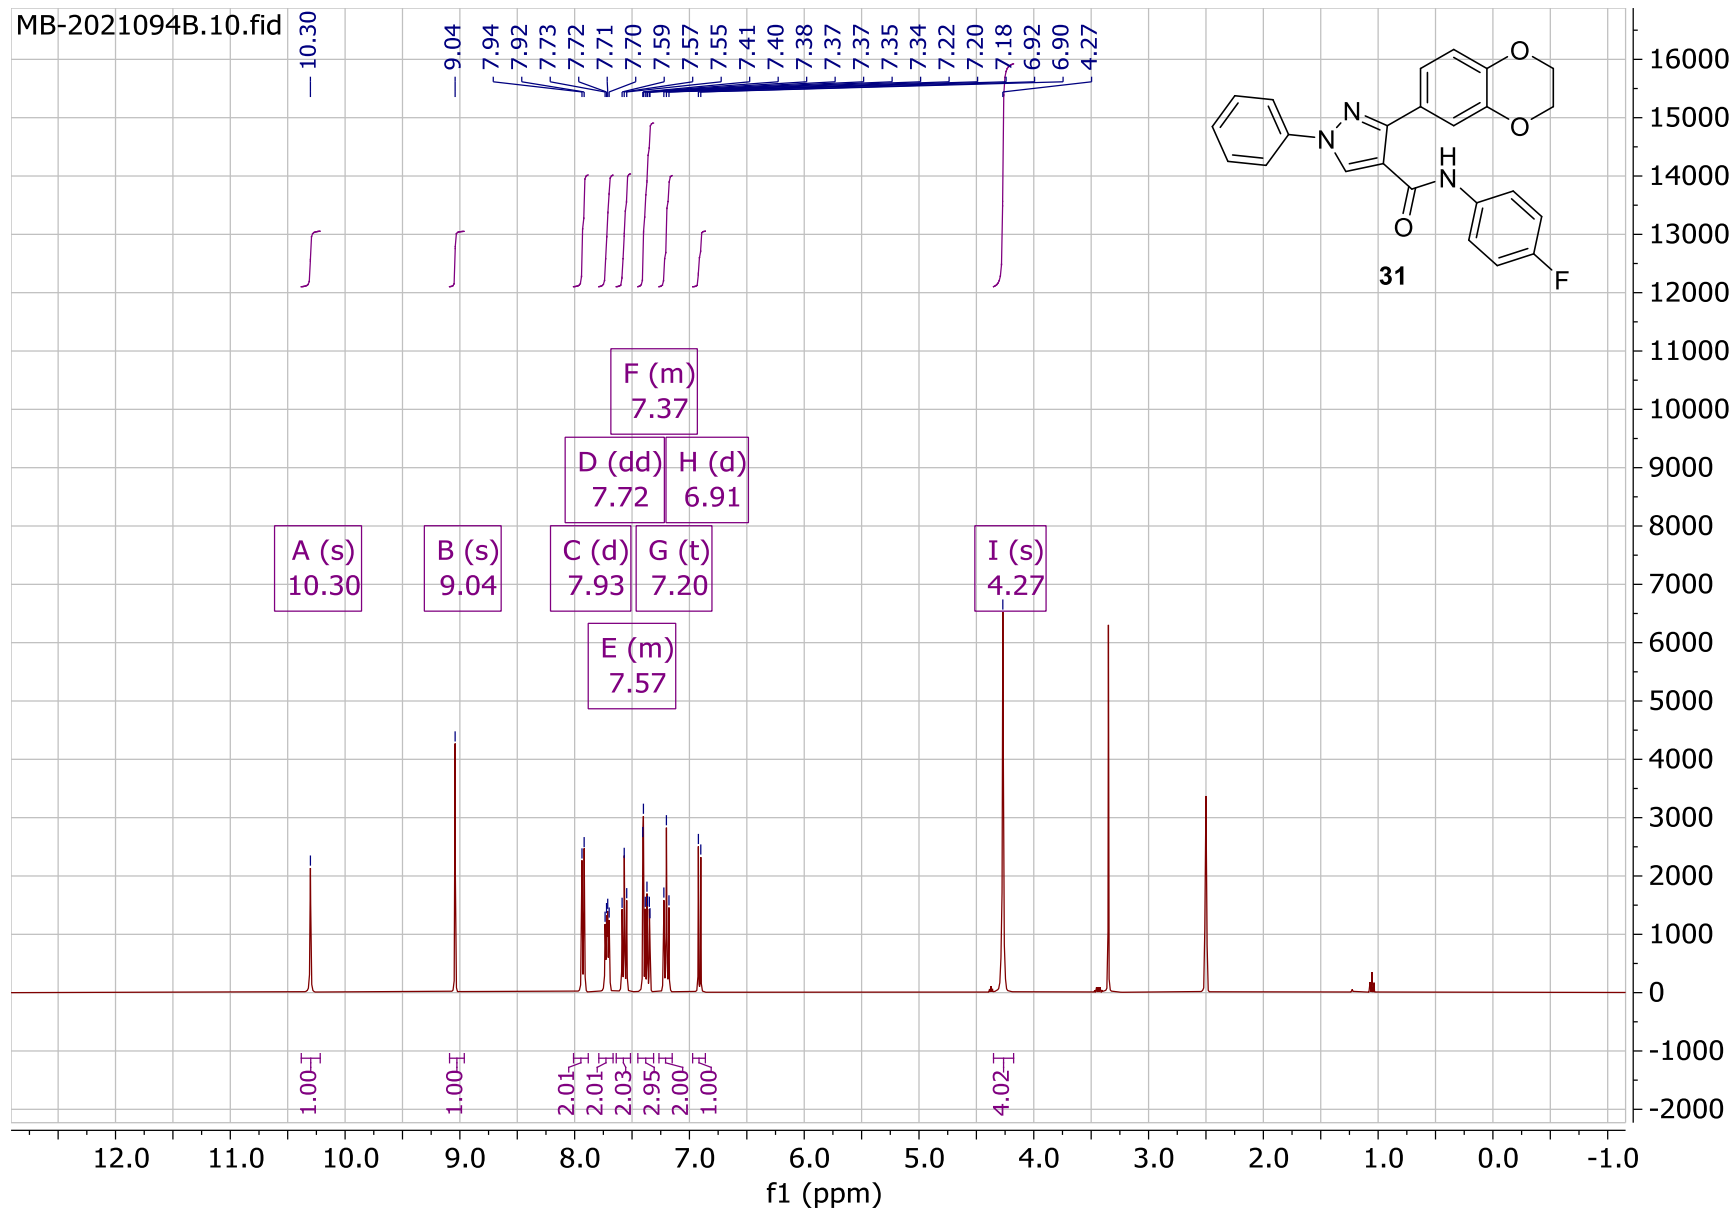

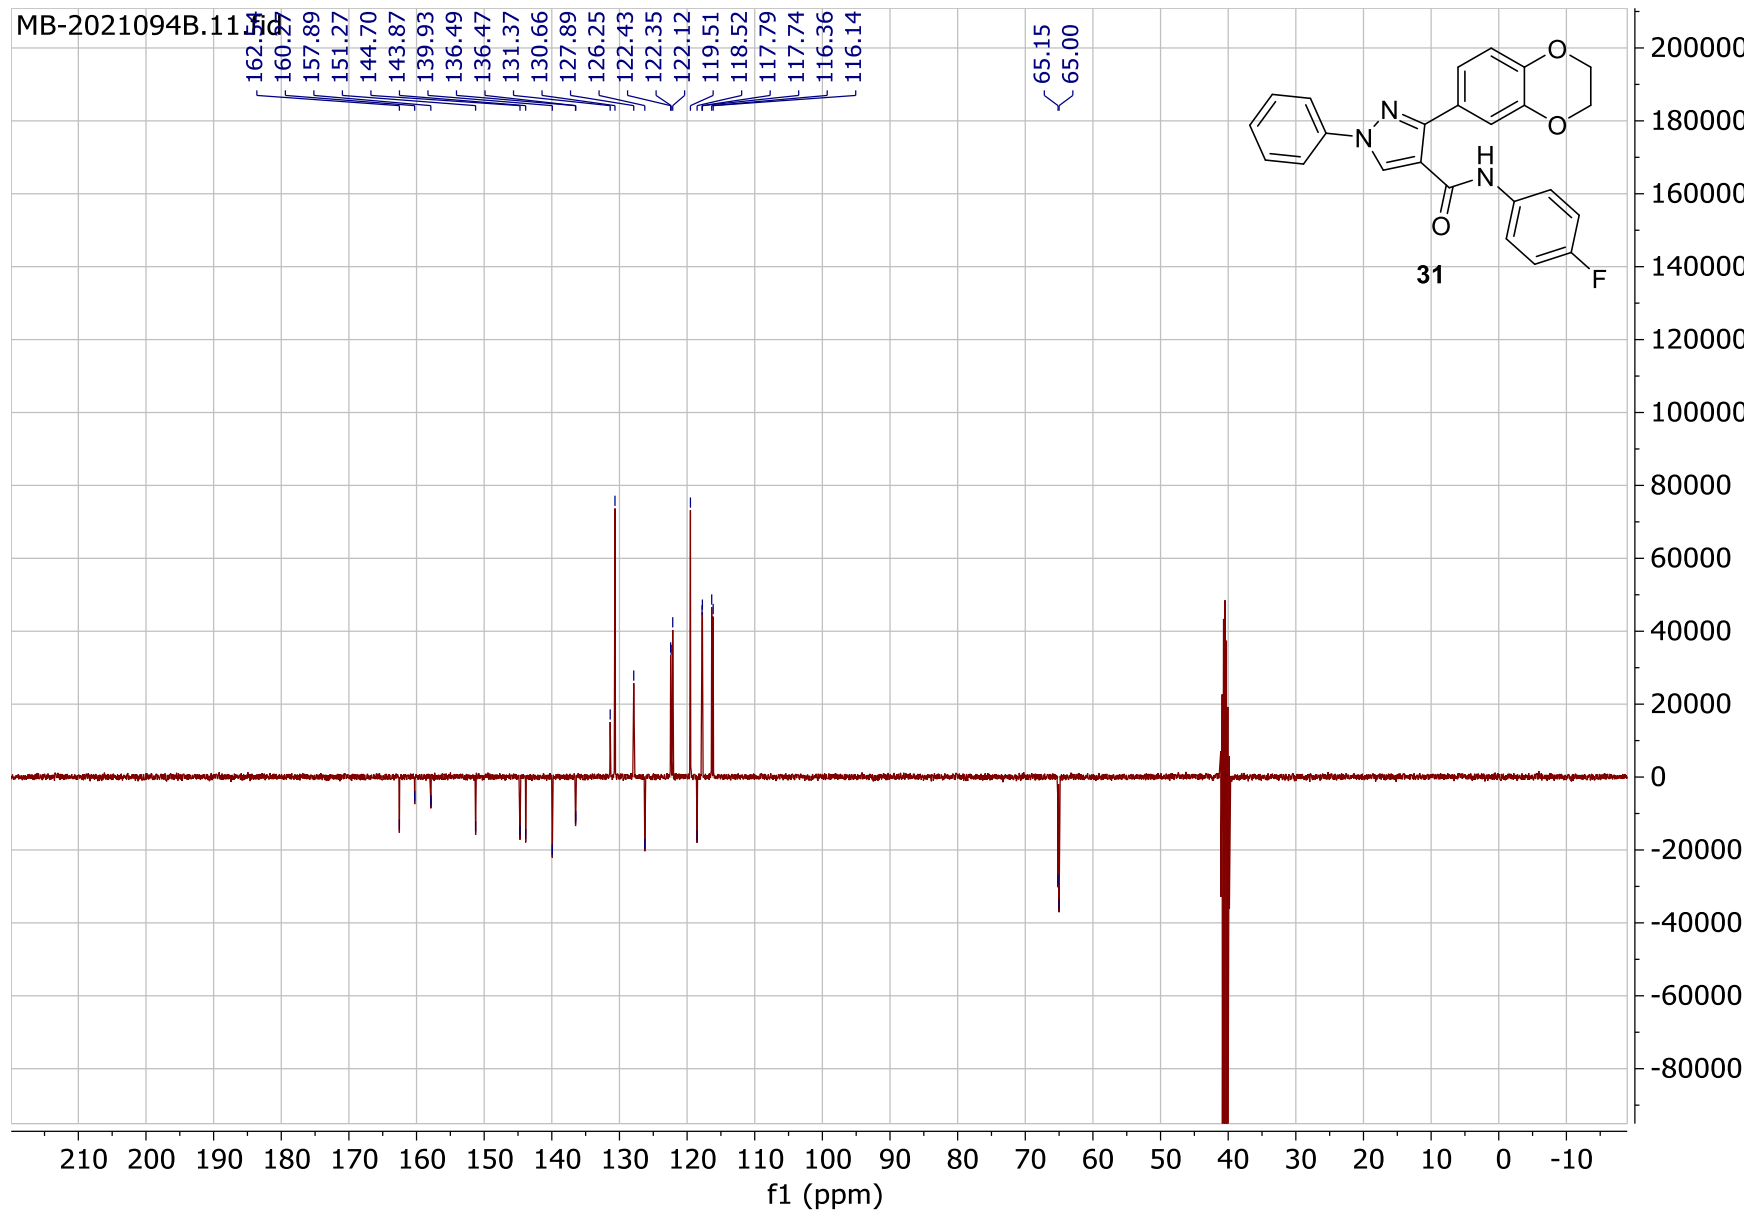

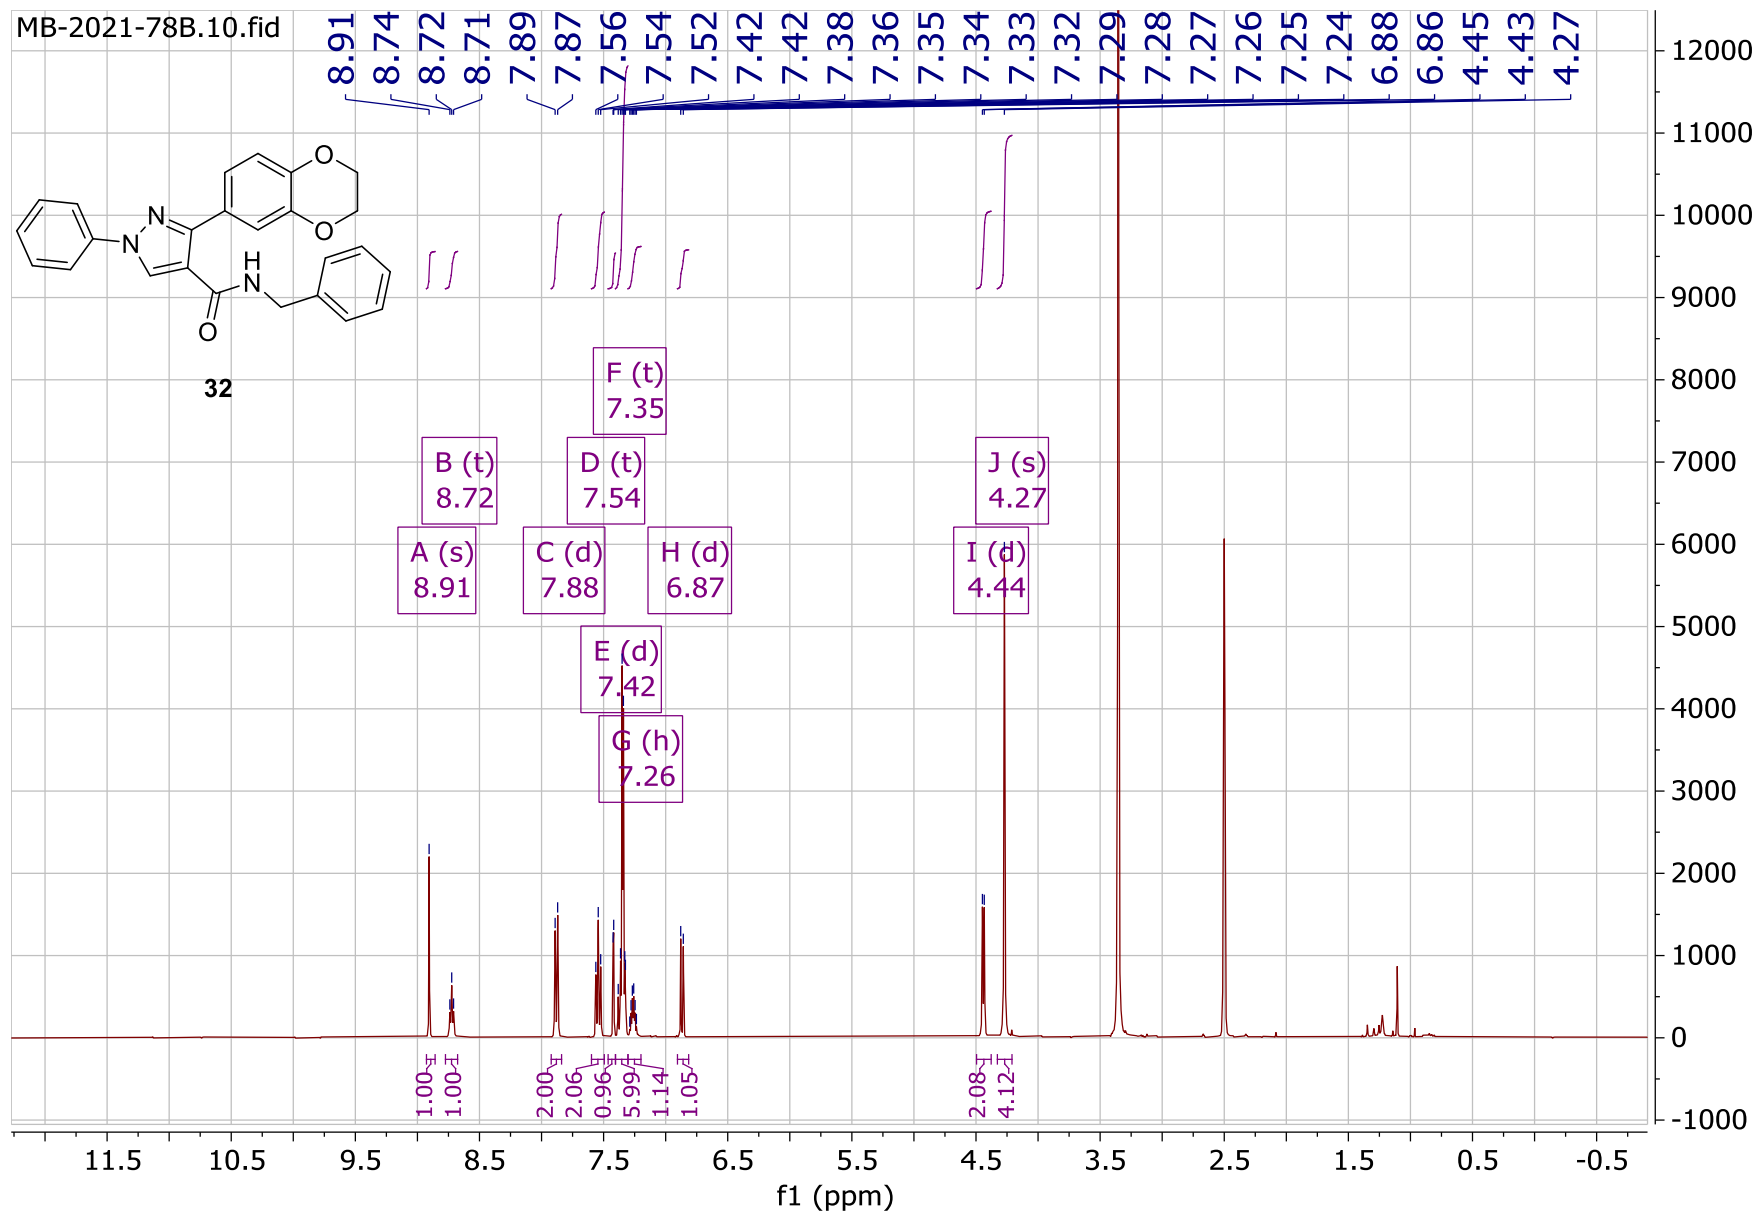

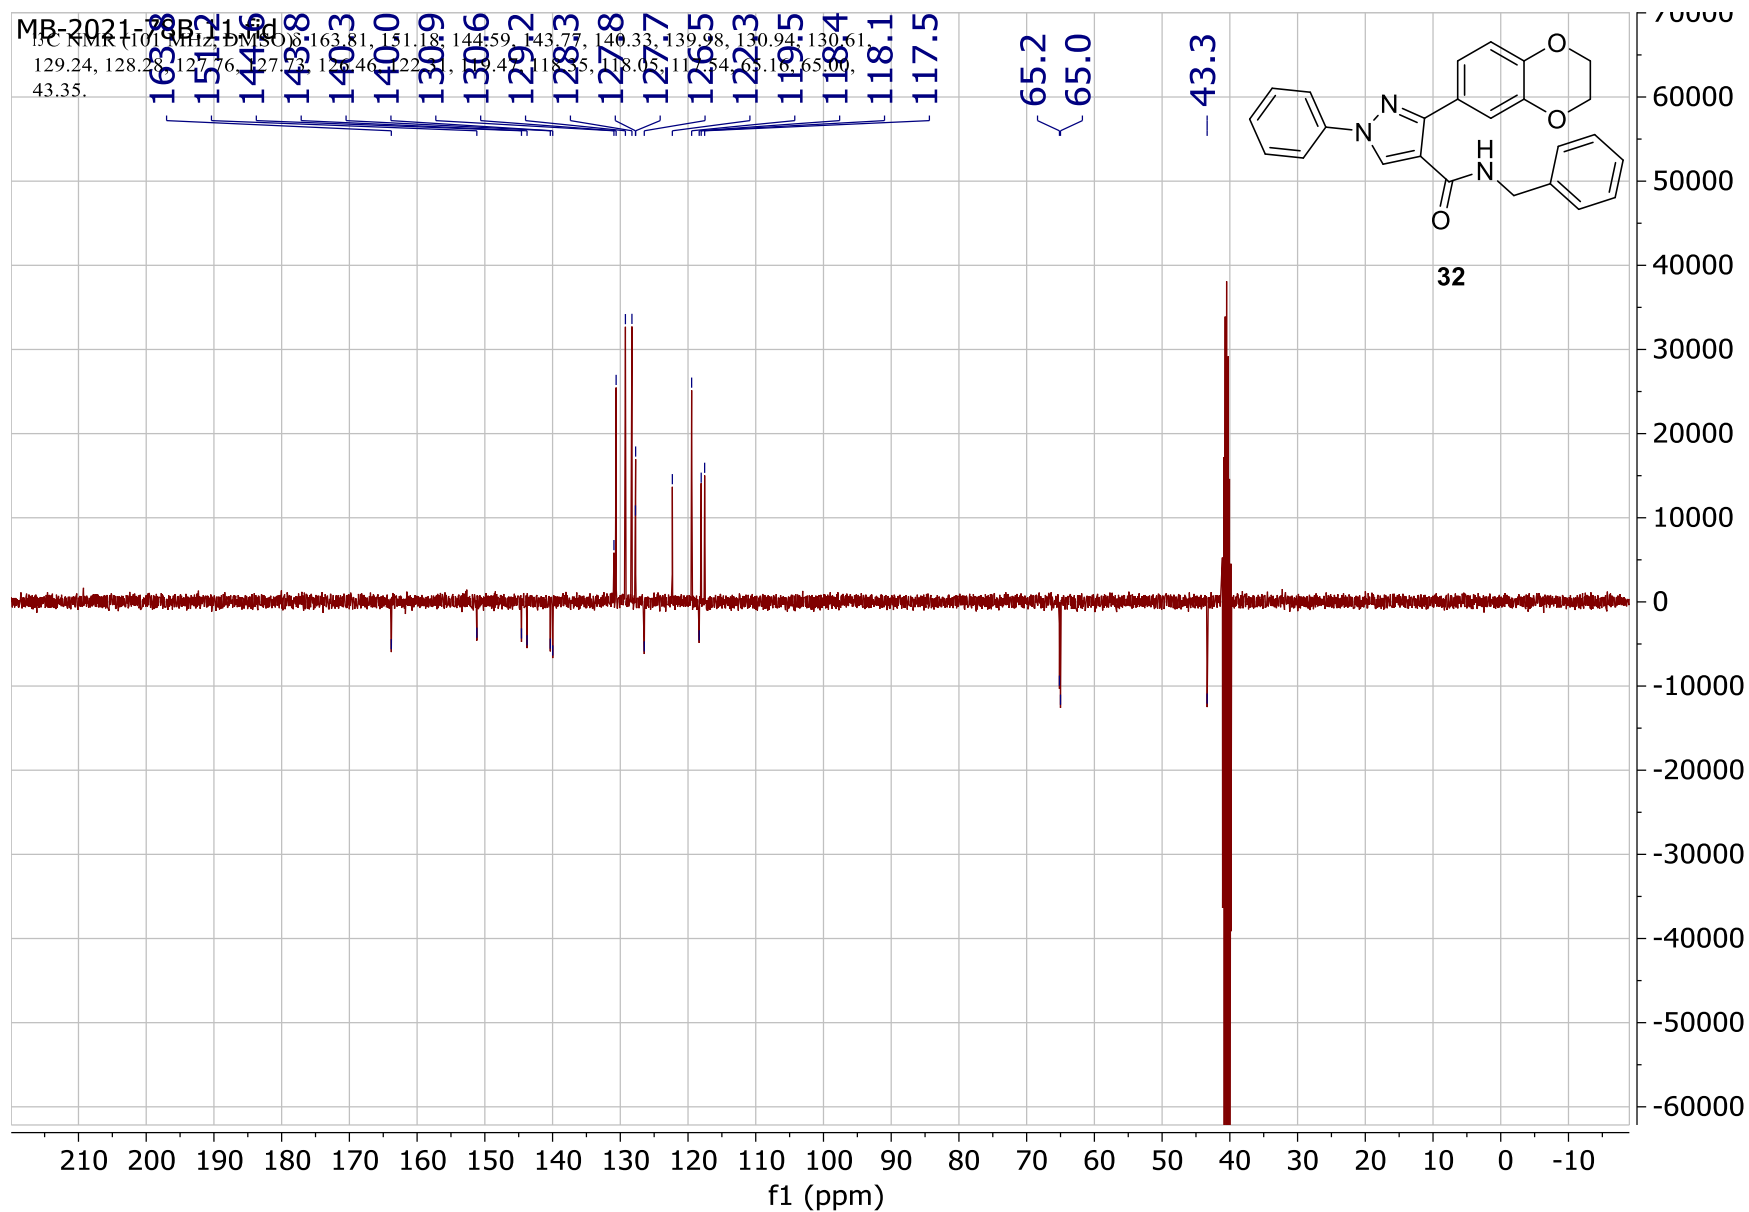

MB-2021-093B.10.fid

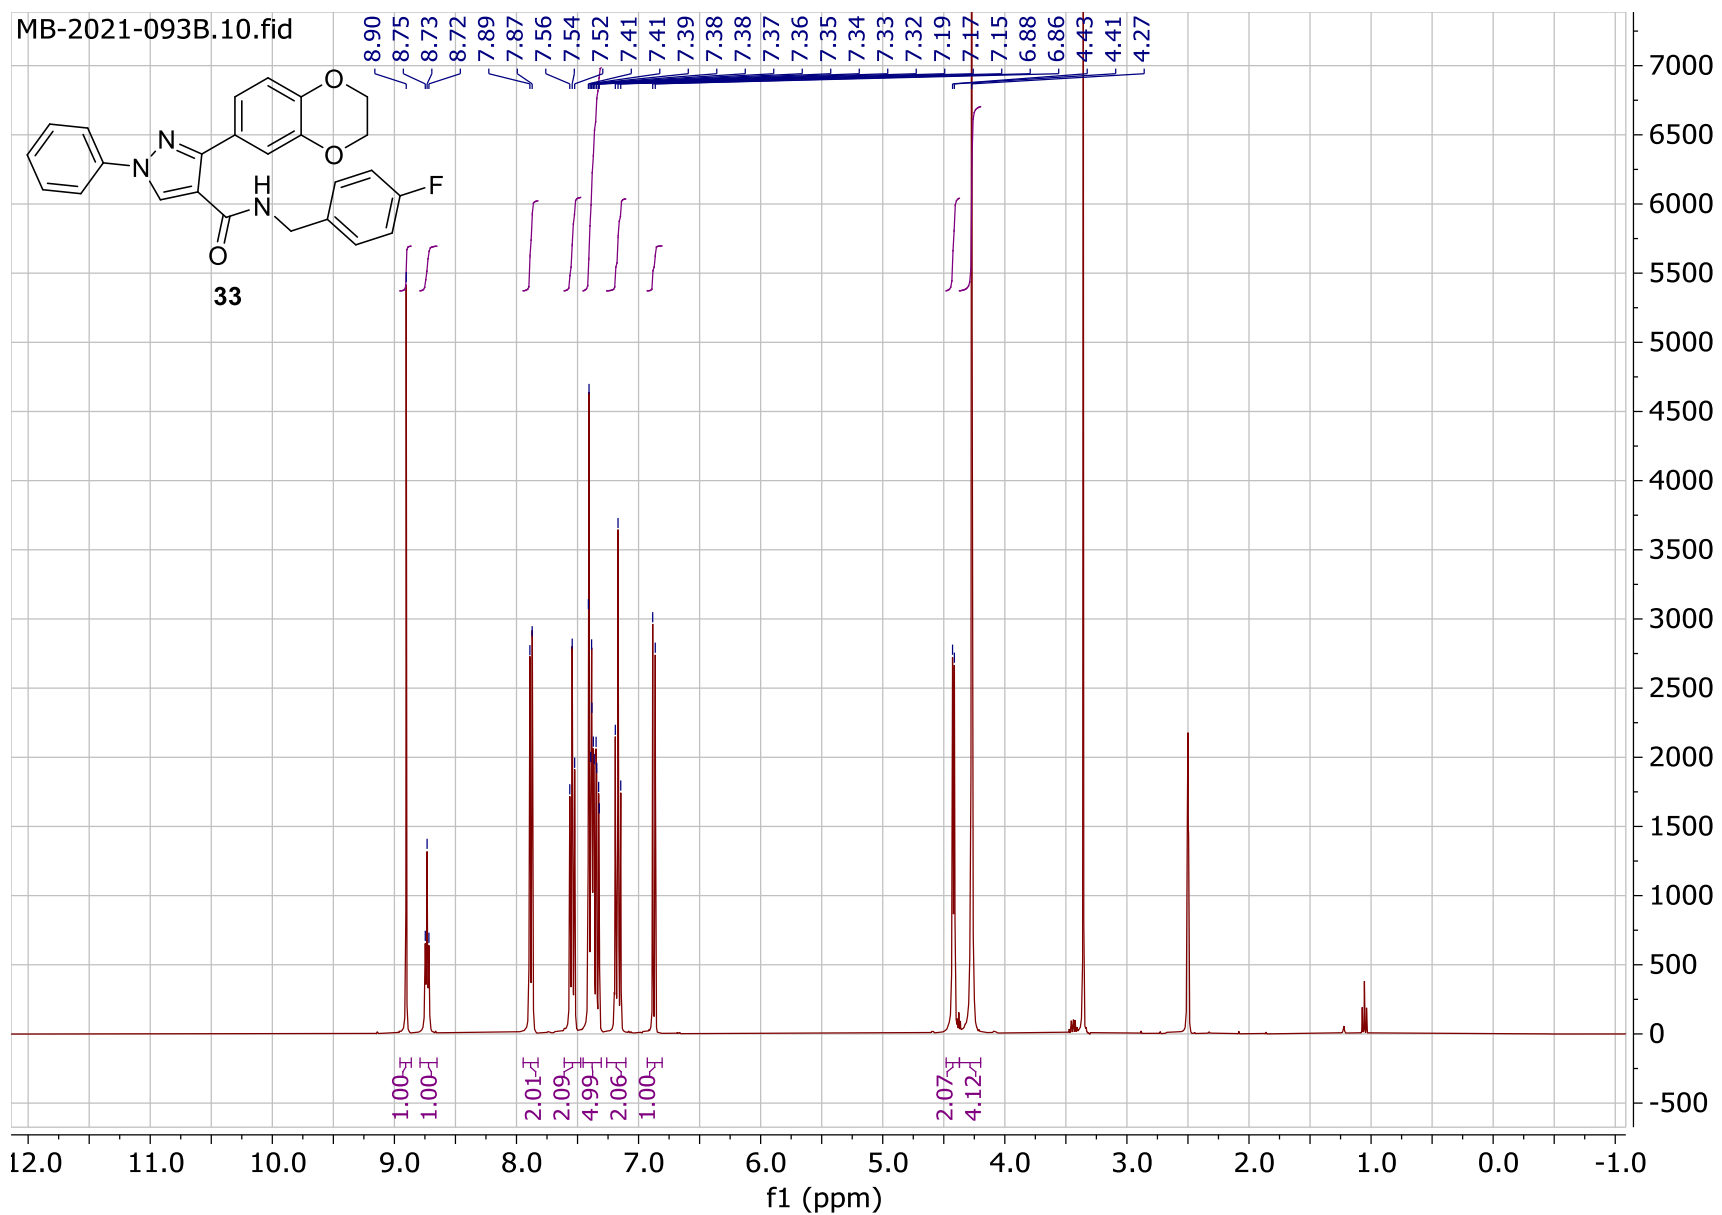

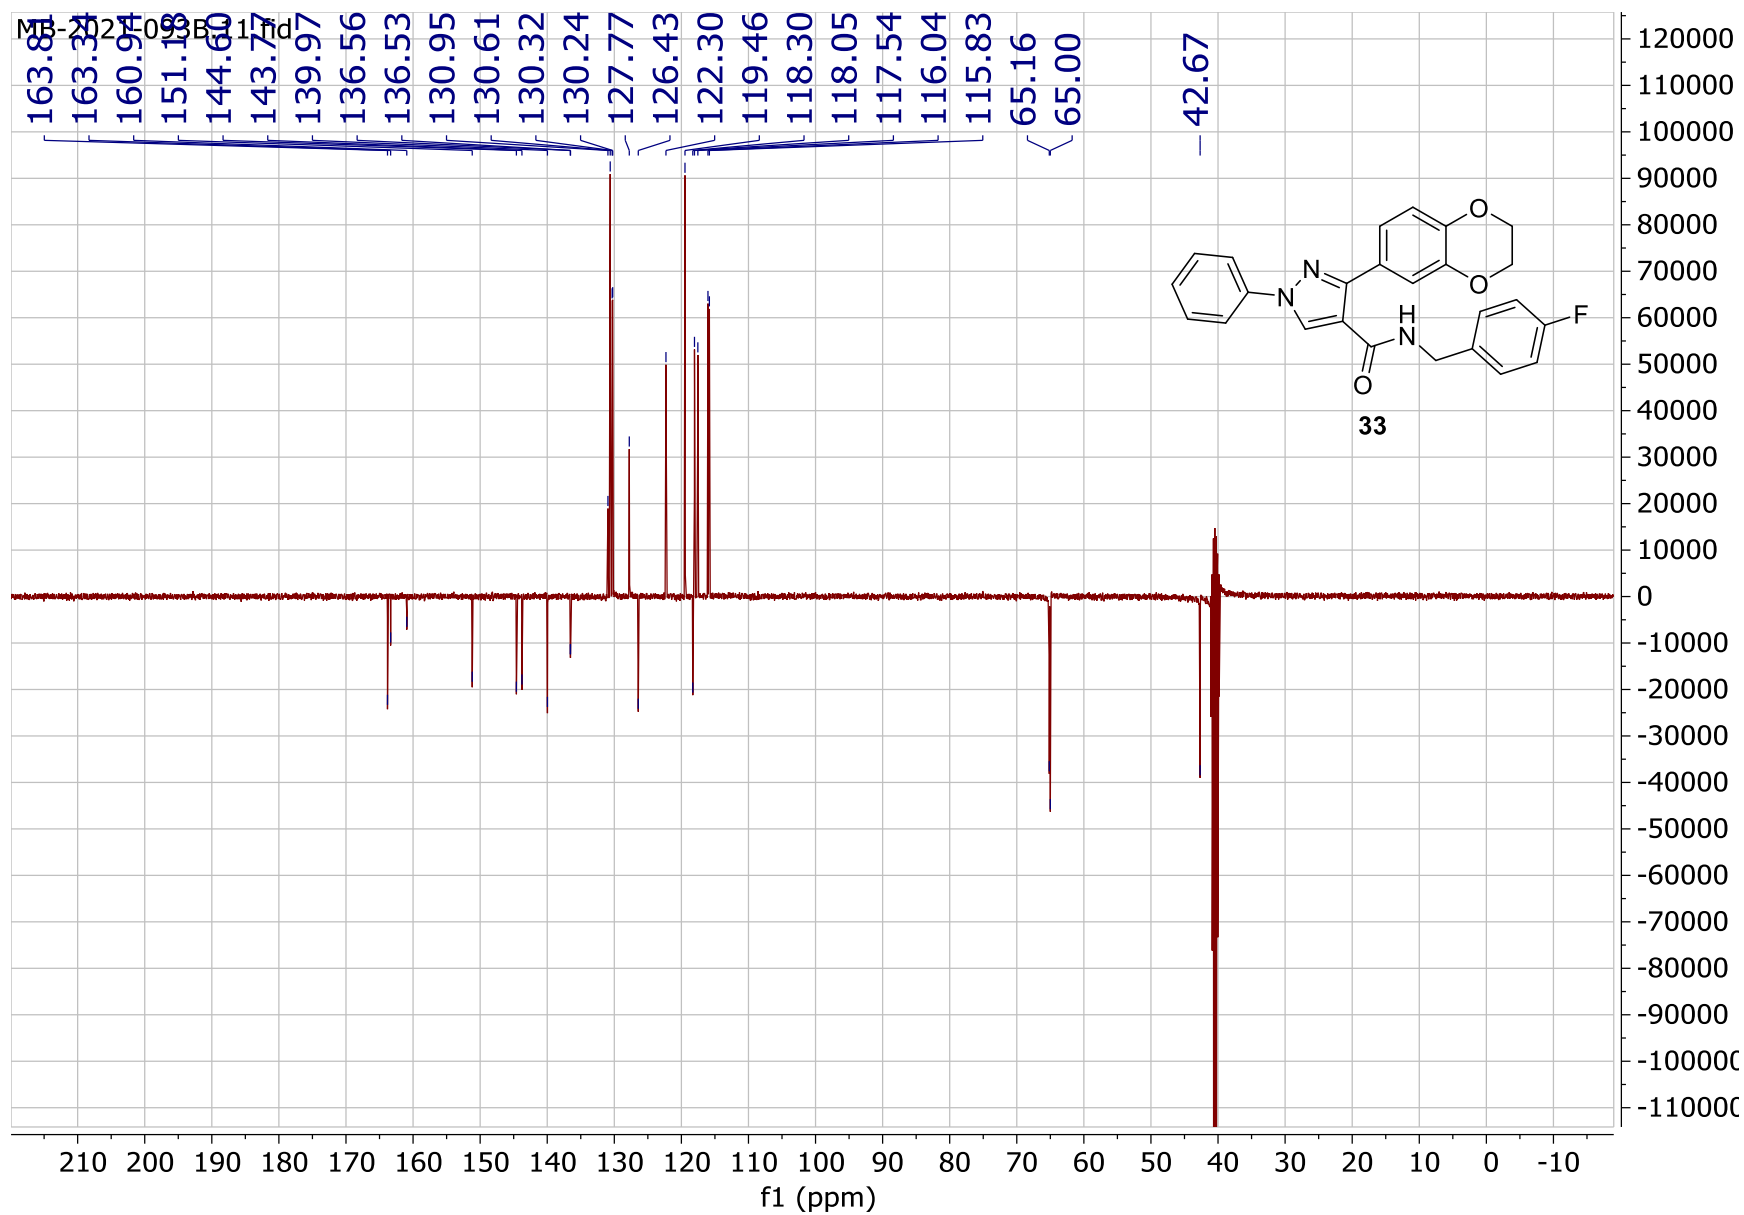

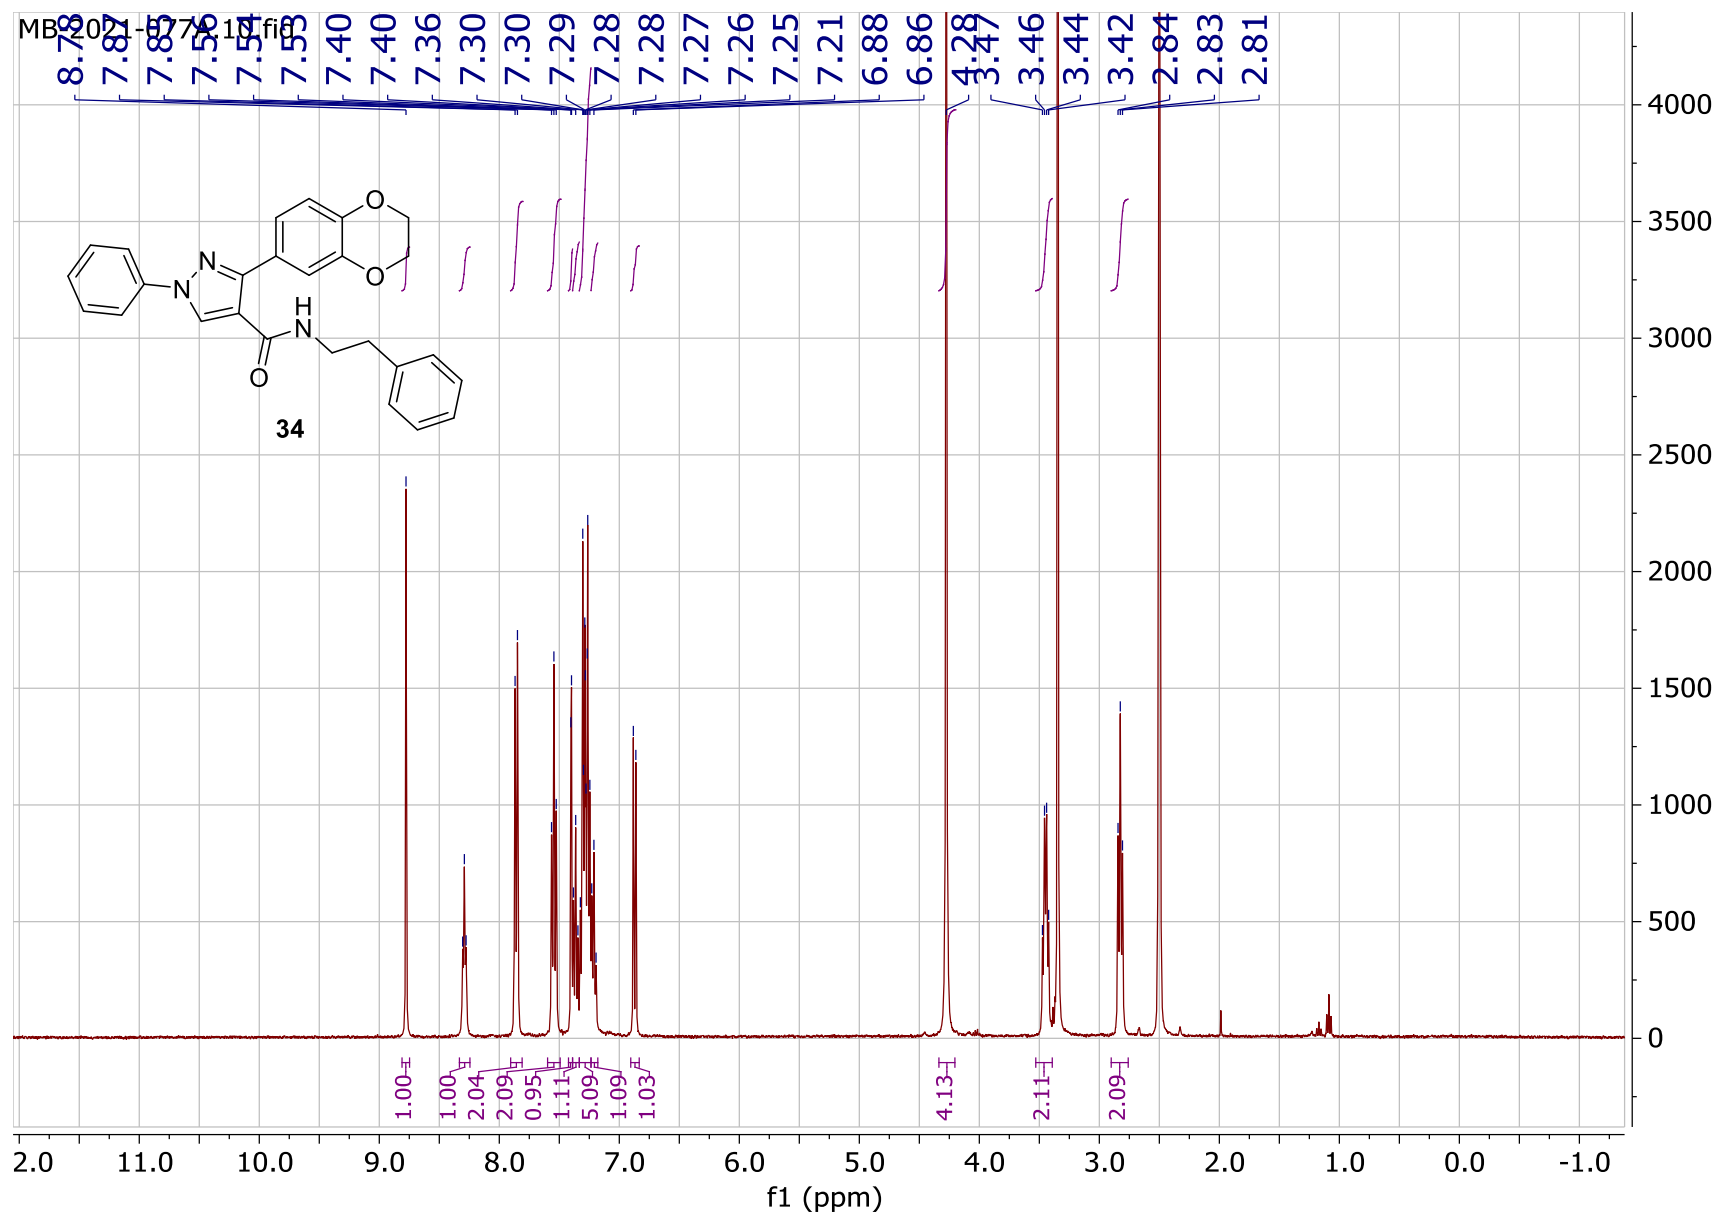



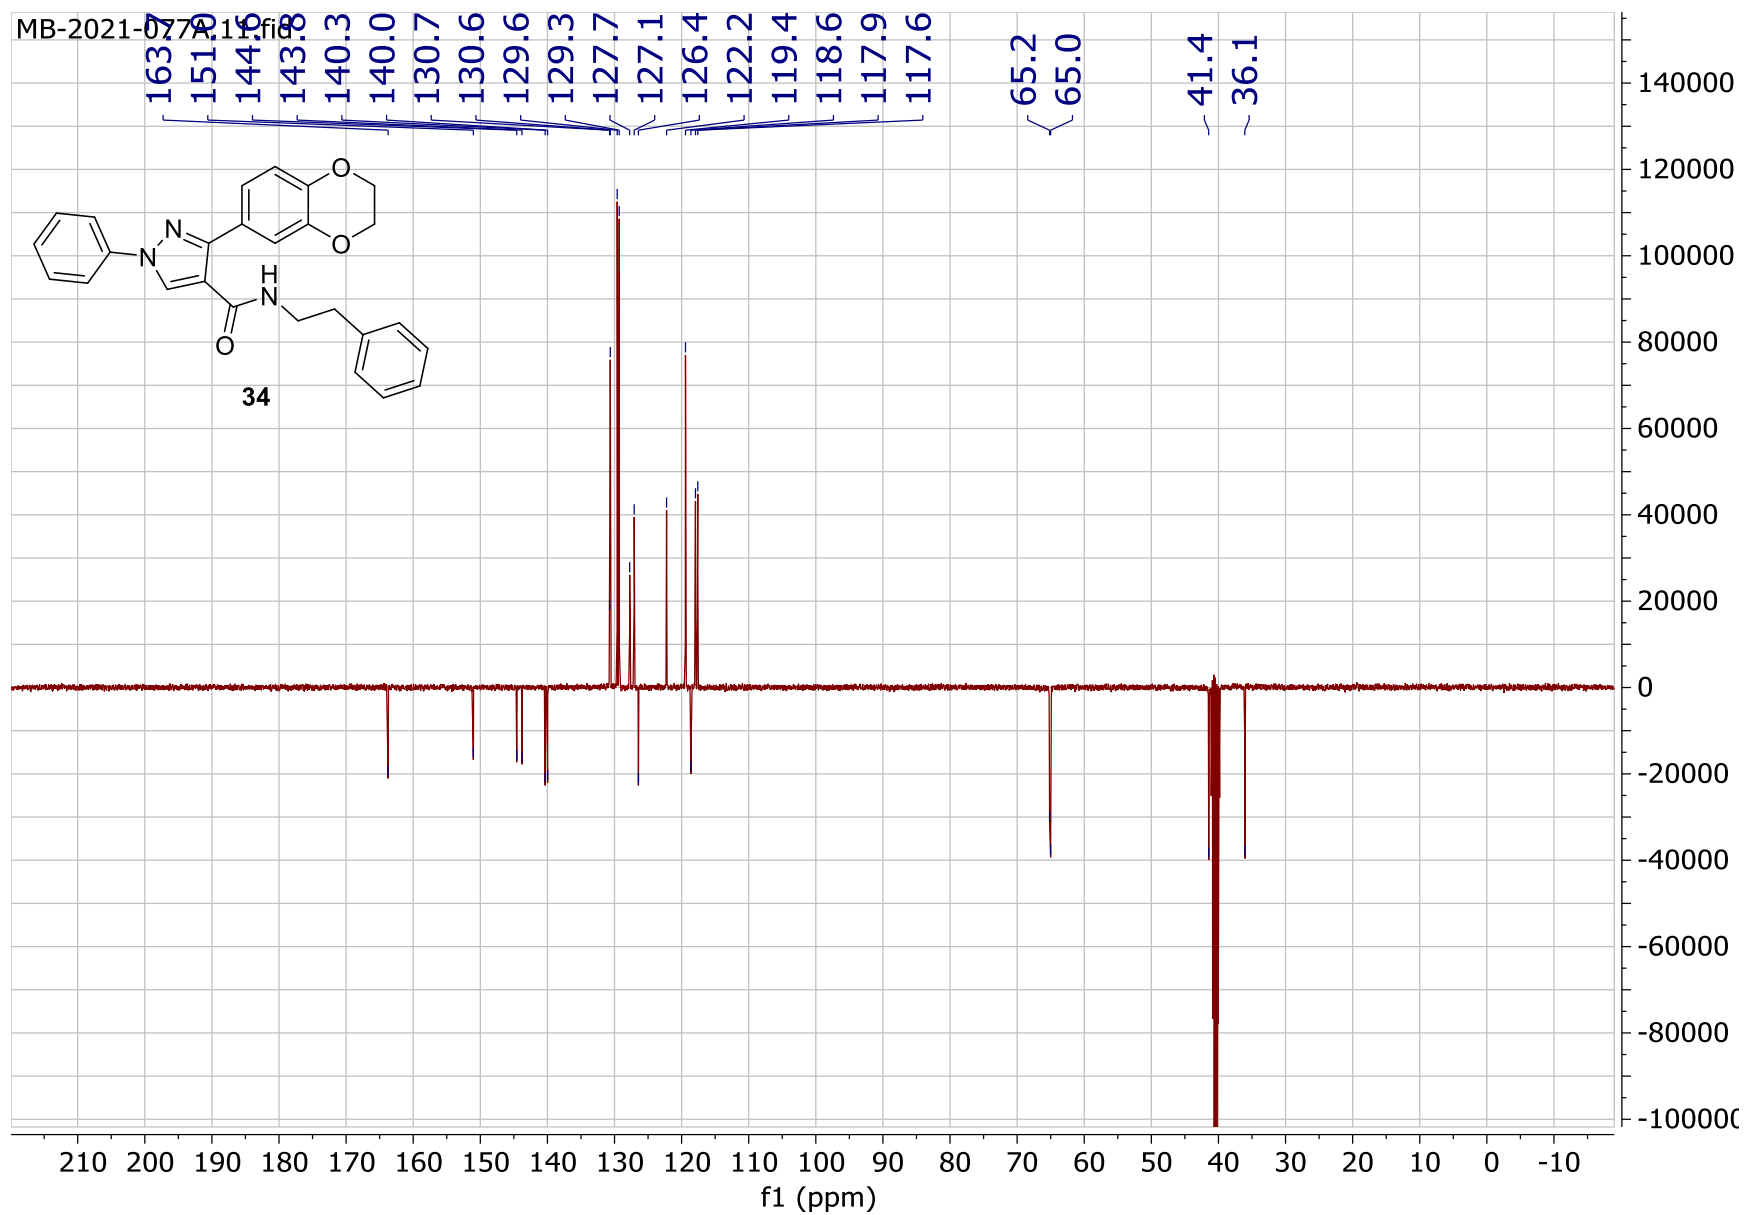

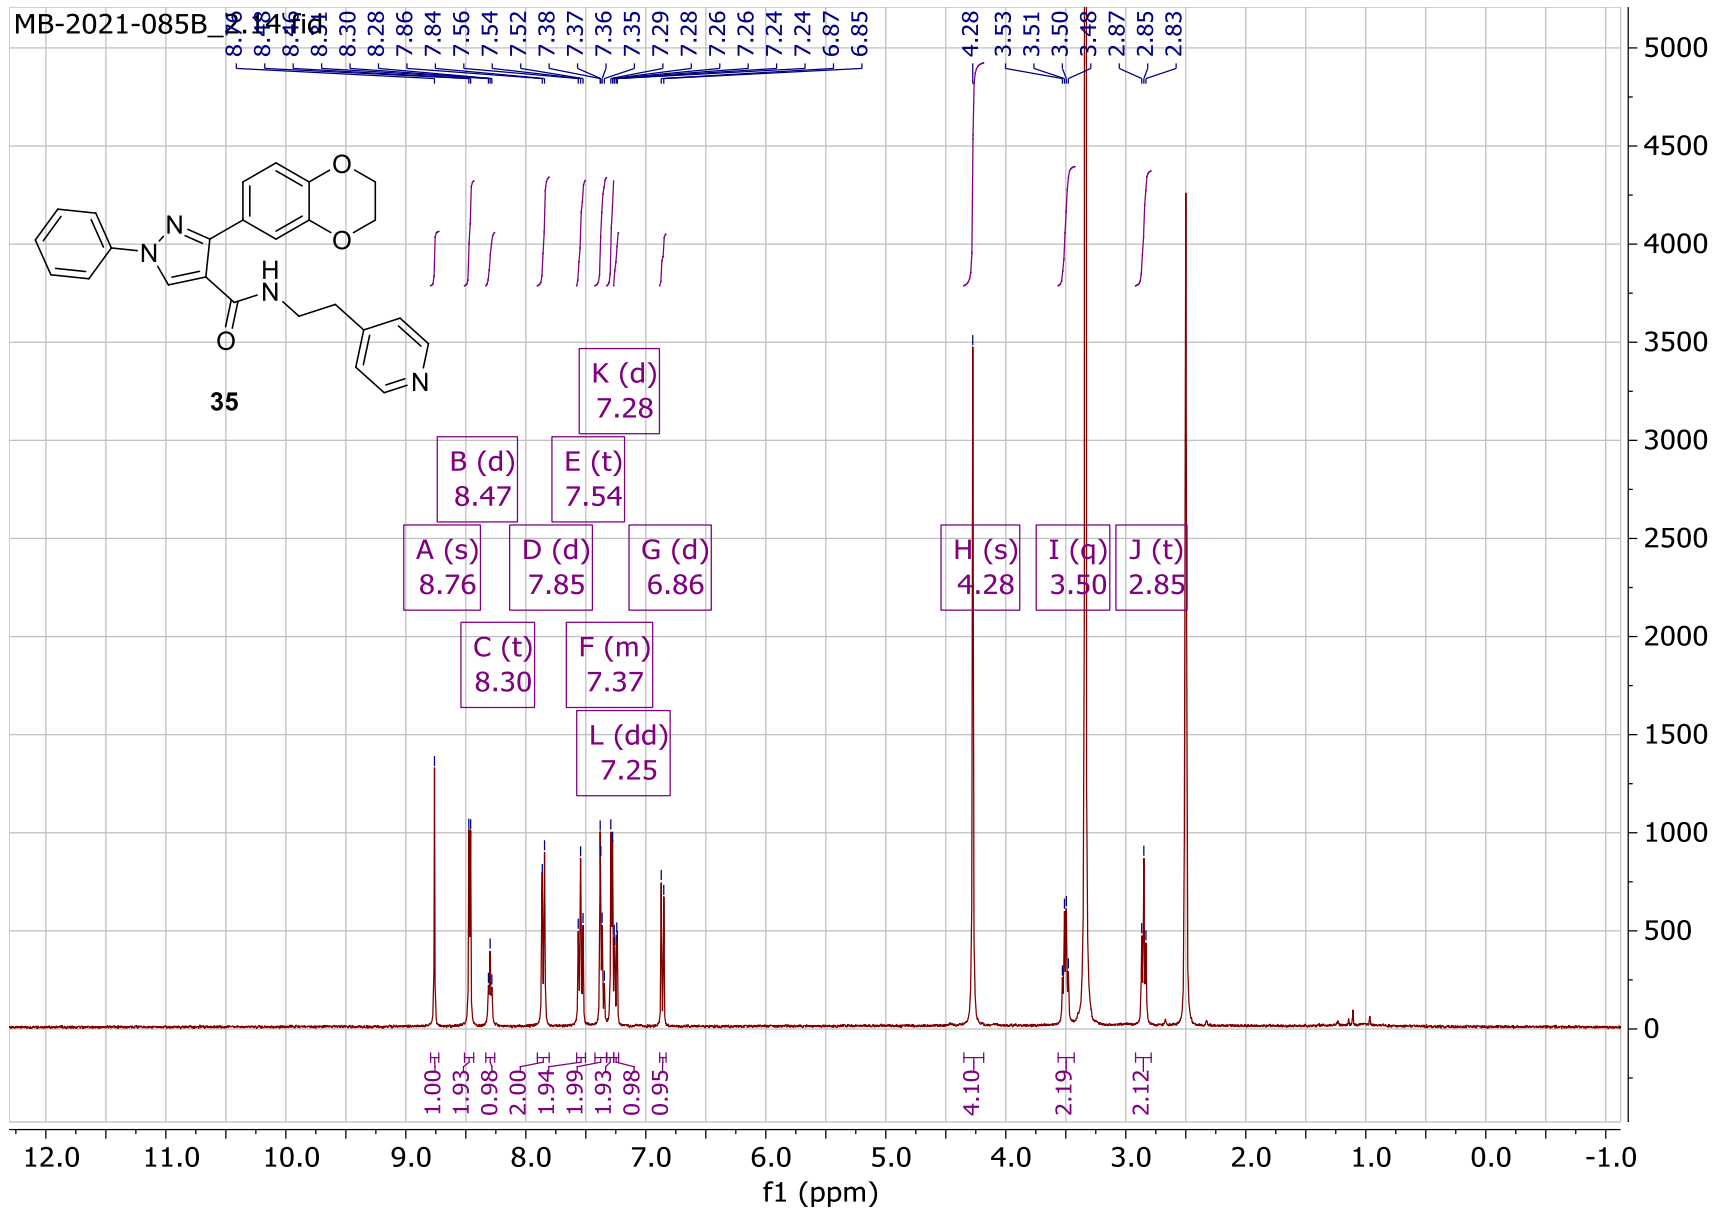

MB-2021-085B\_2.13.fid

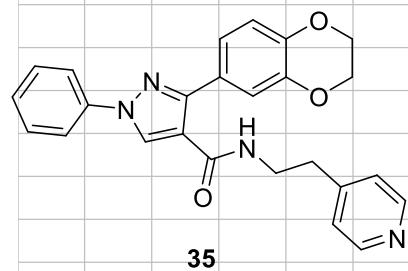

163.81  
151.00  
150.40  
149.25  
144.57  
143.78  
139.94  
130.70  
130.61  
127.75  
126.37  
125.16  
121.49  
119.44  
118.47  
117.86  
117.56

65.15  
65.00

40.15  
35.17

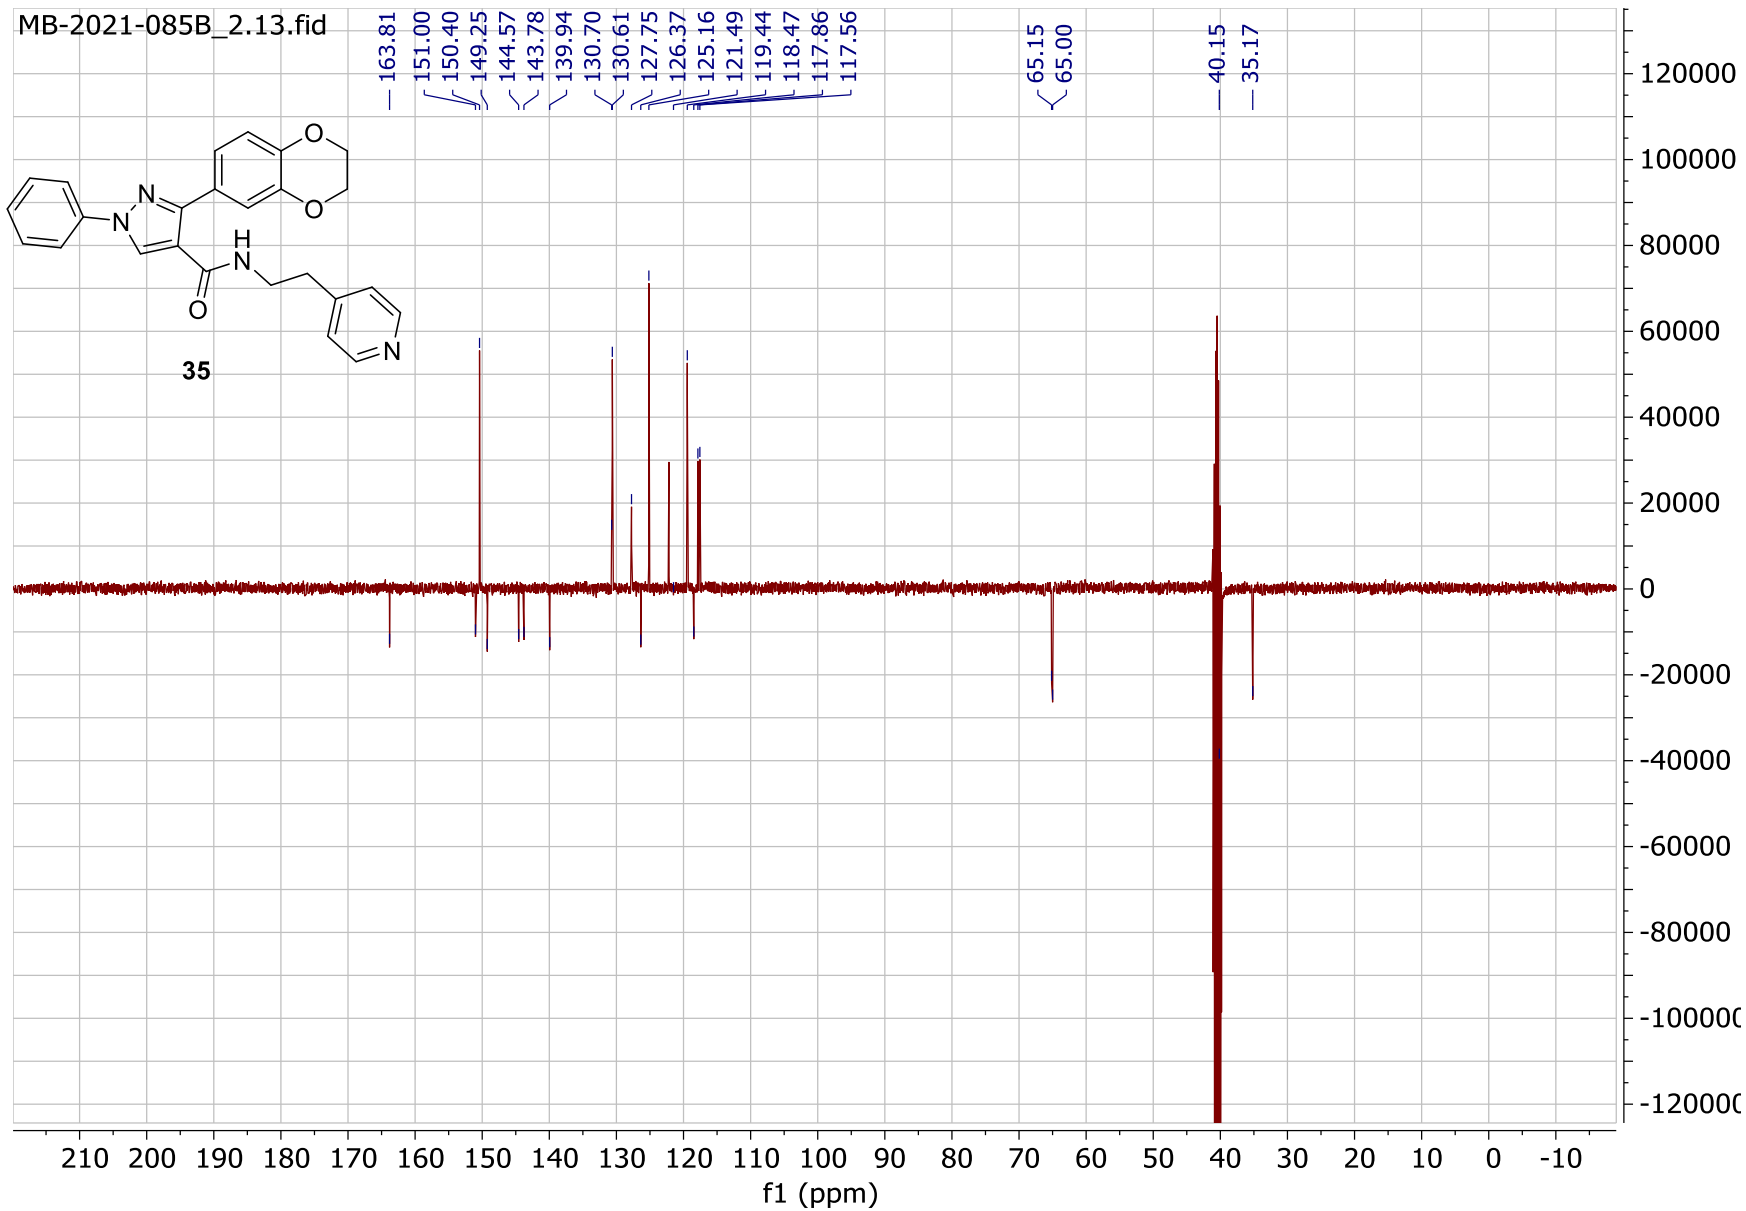

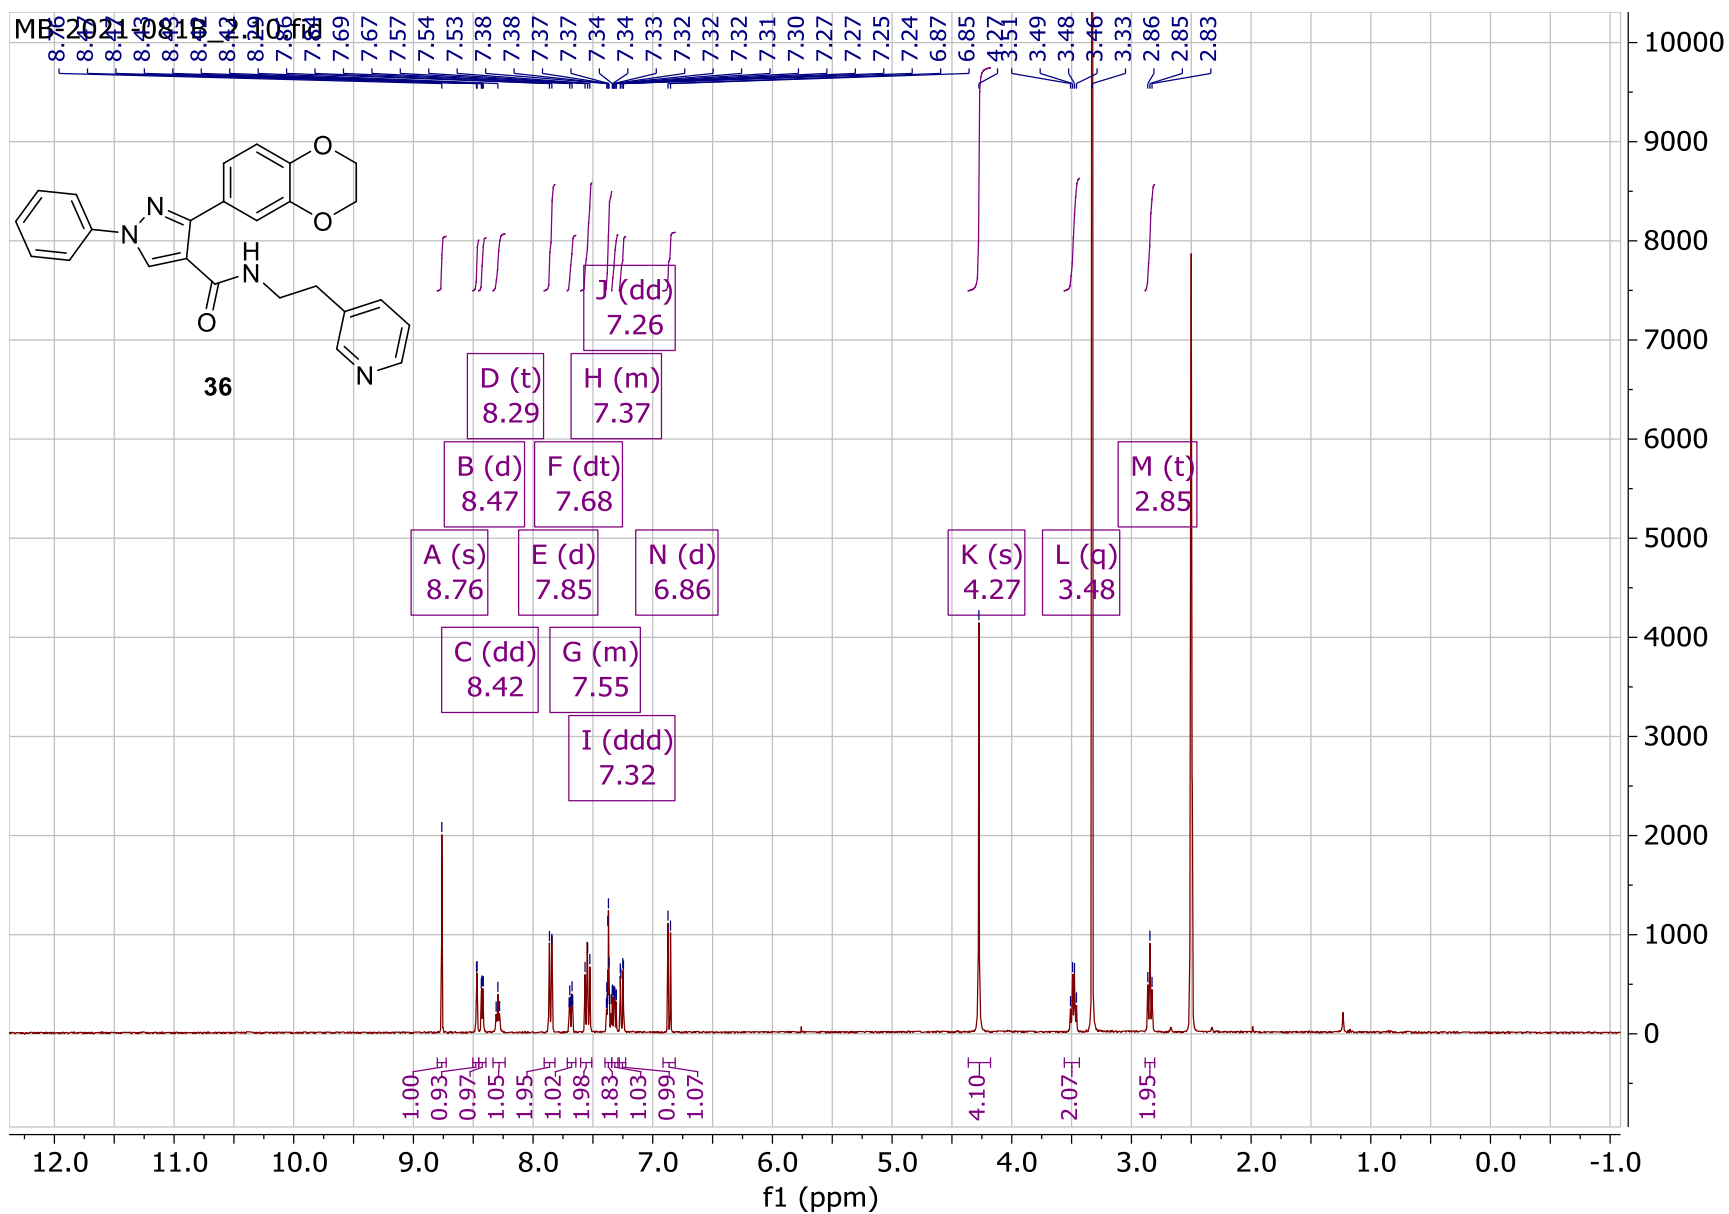

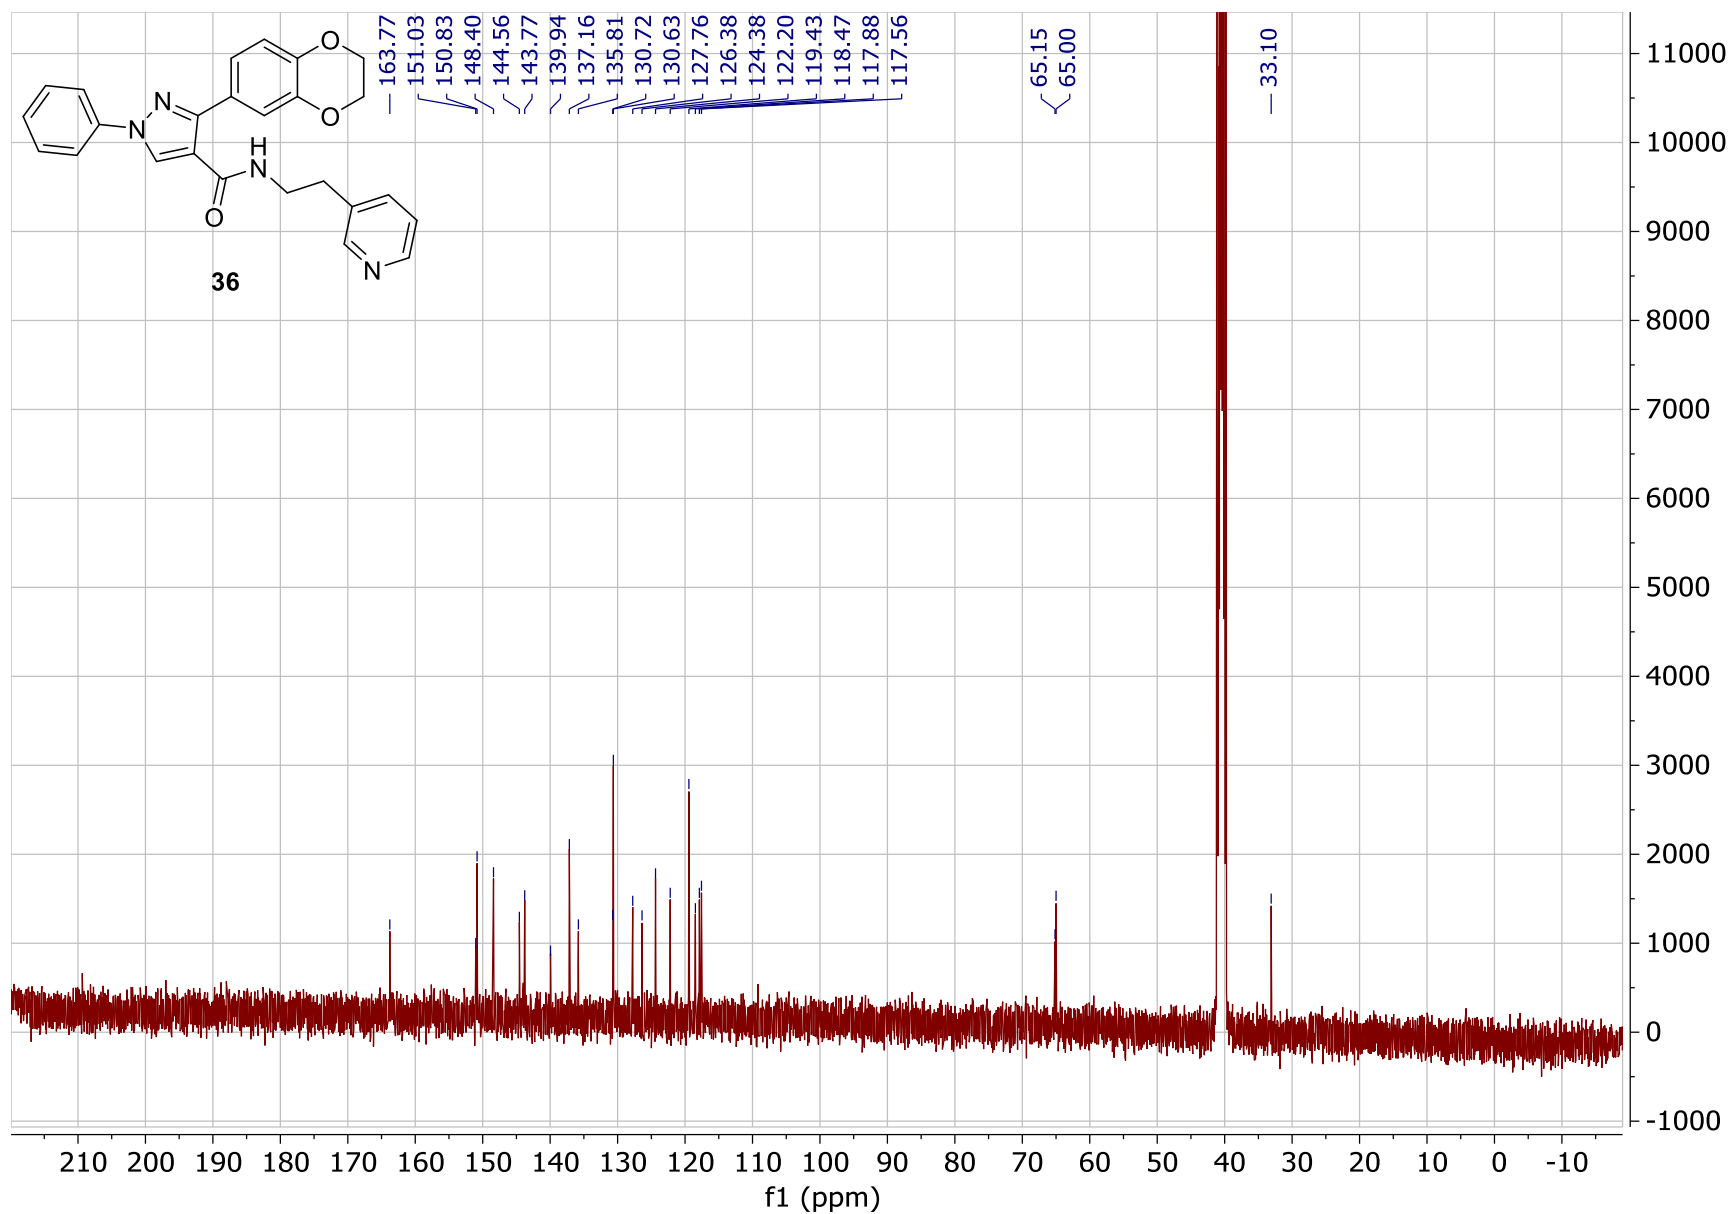

MB-2021-079B.10.fid

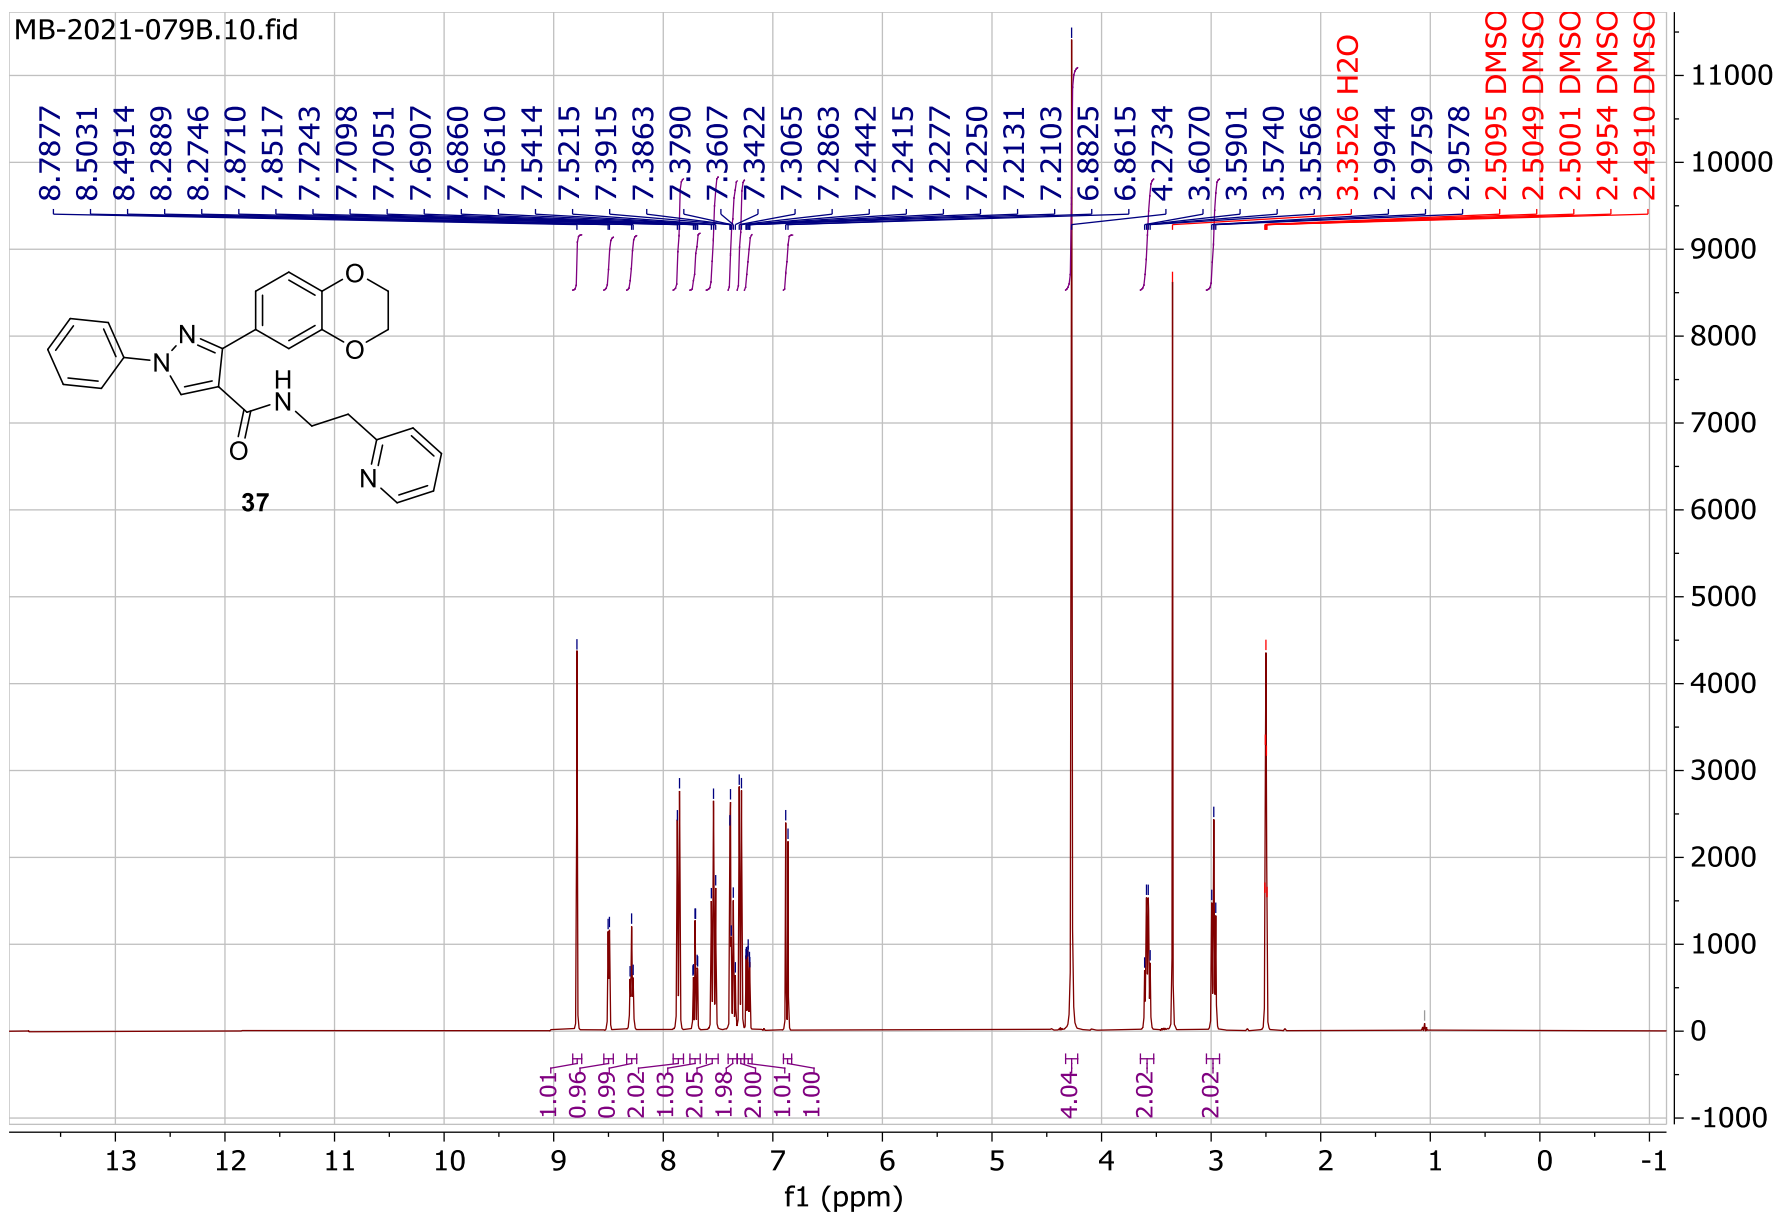

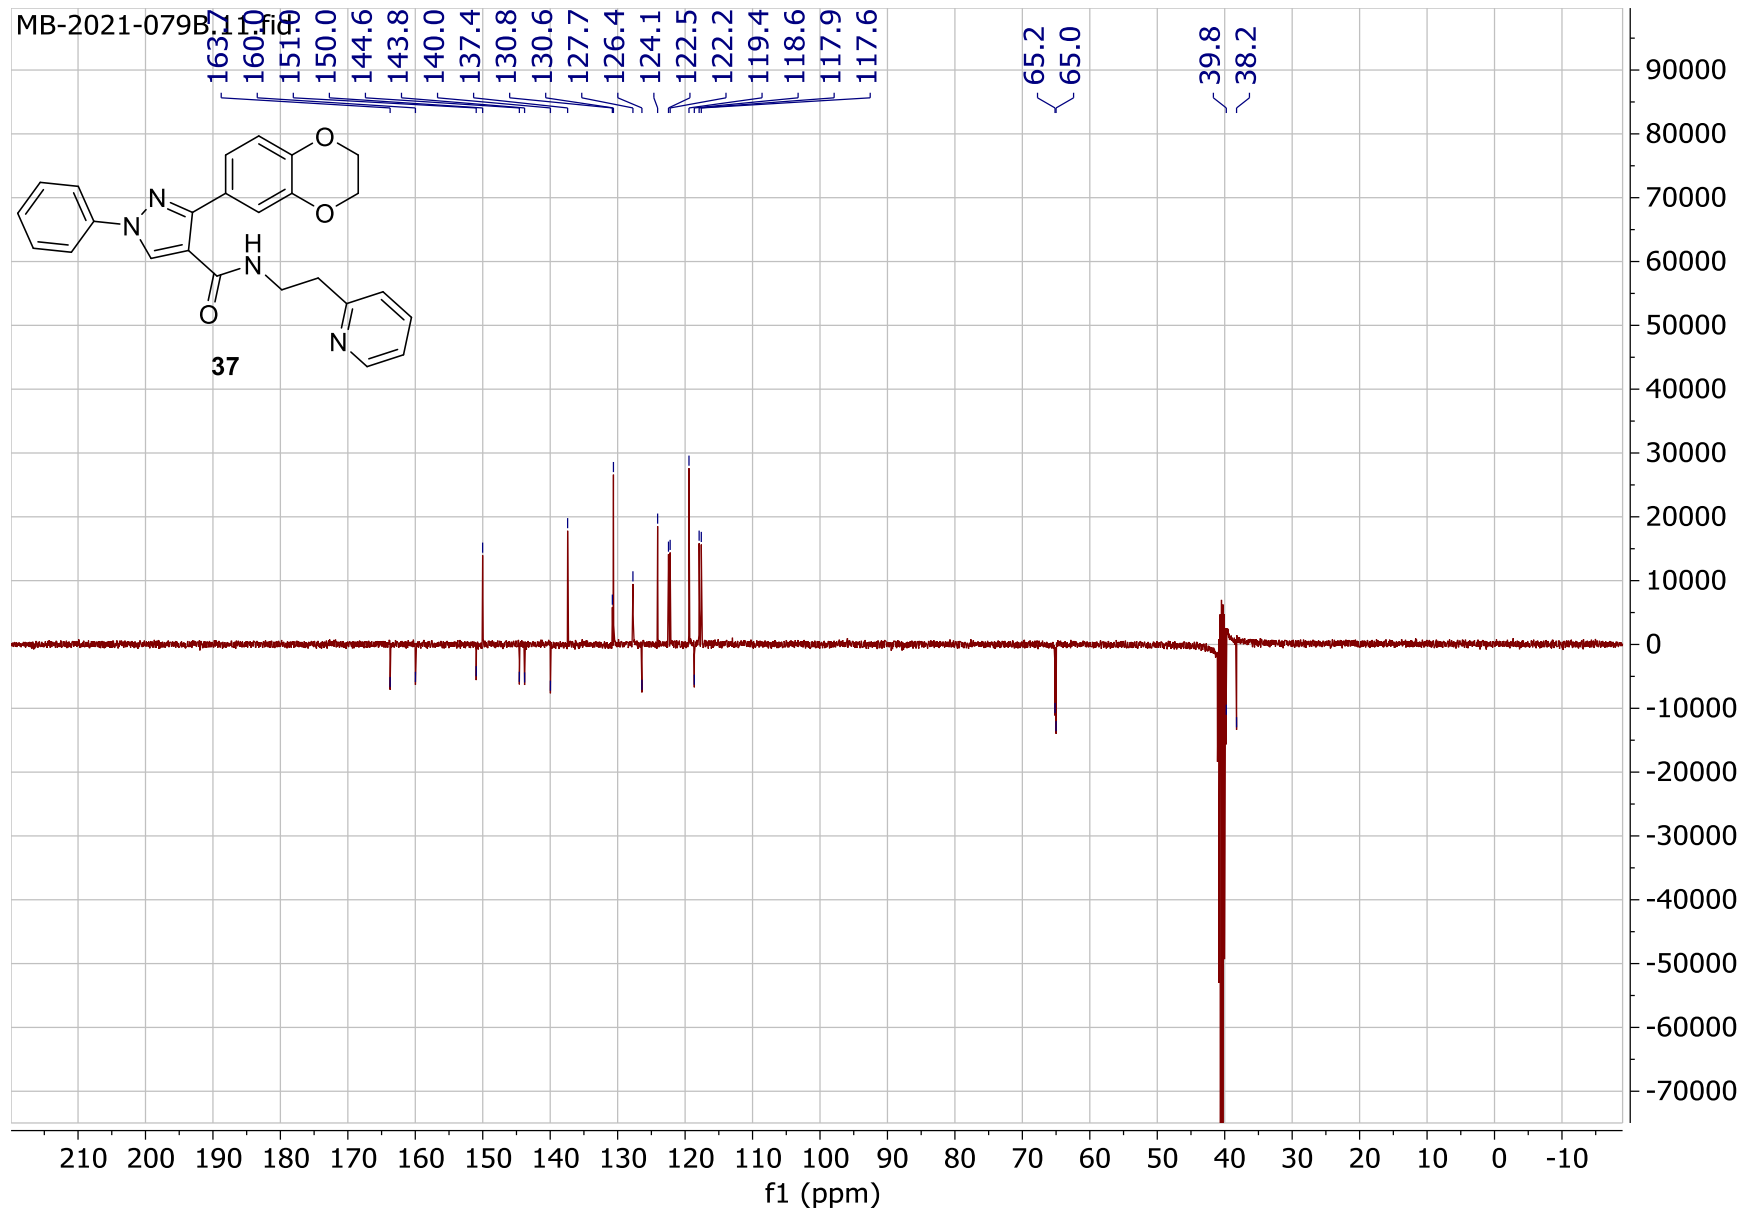

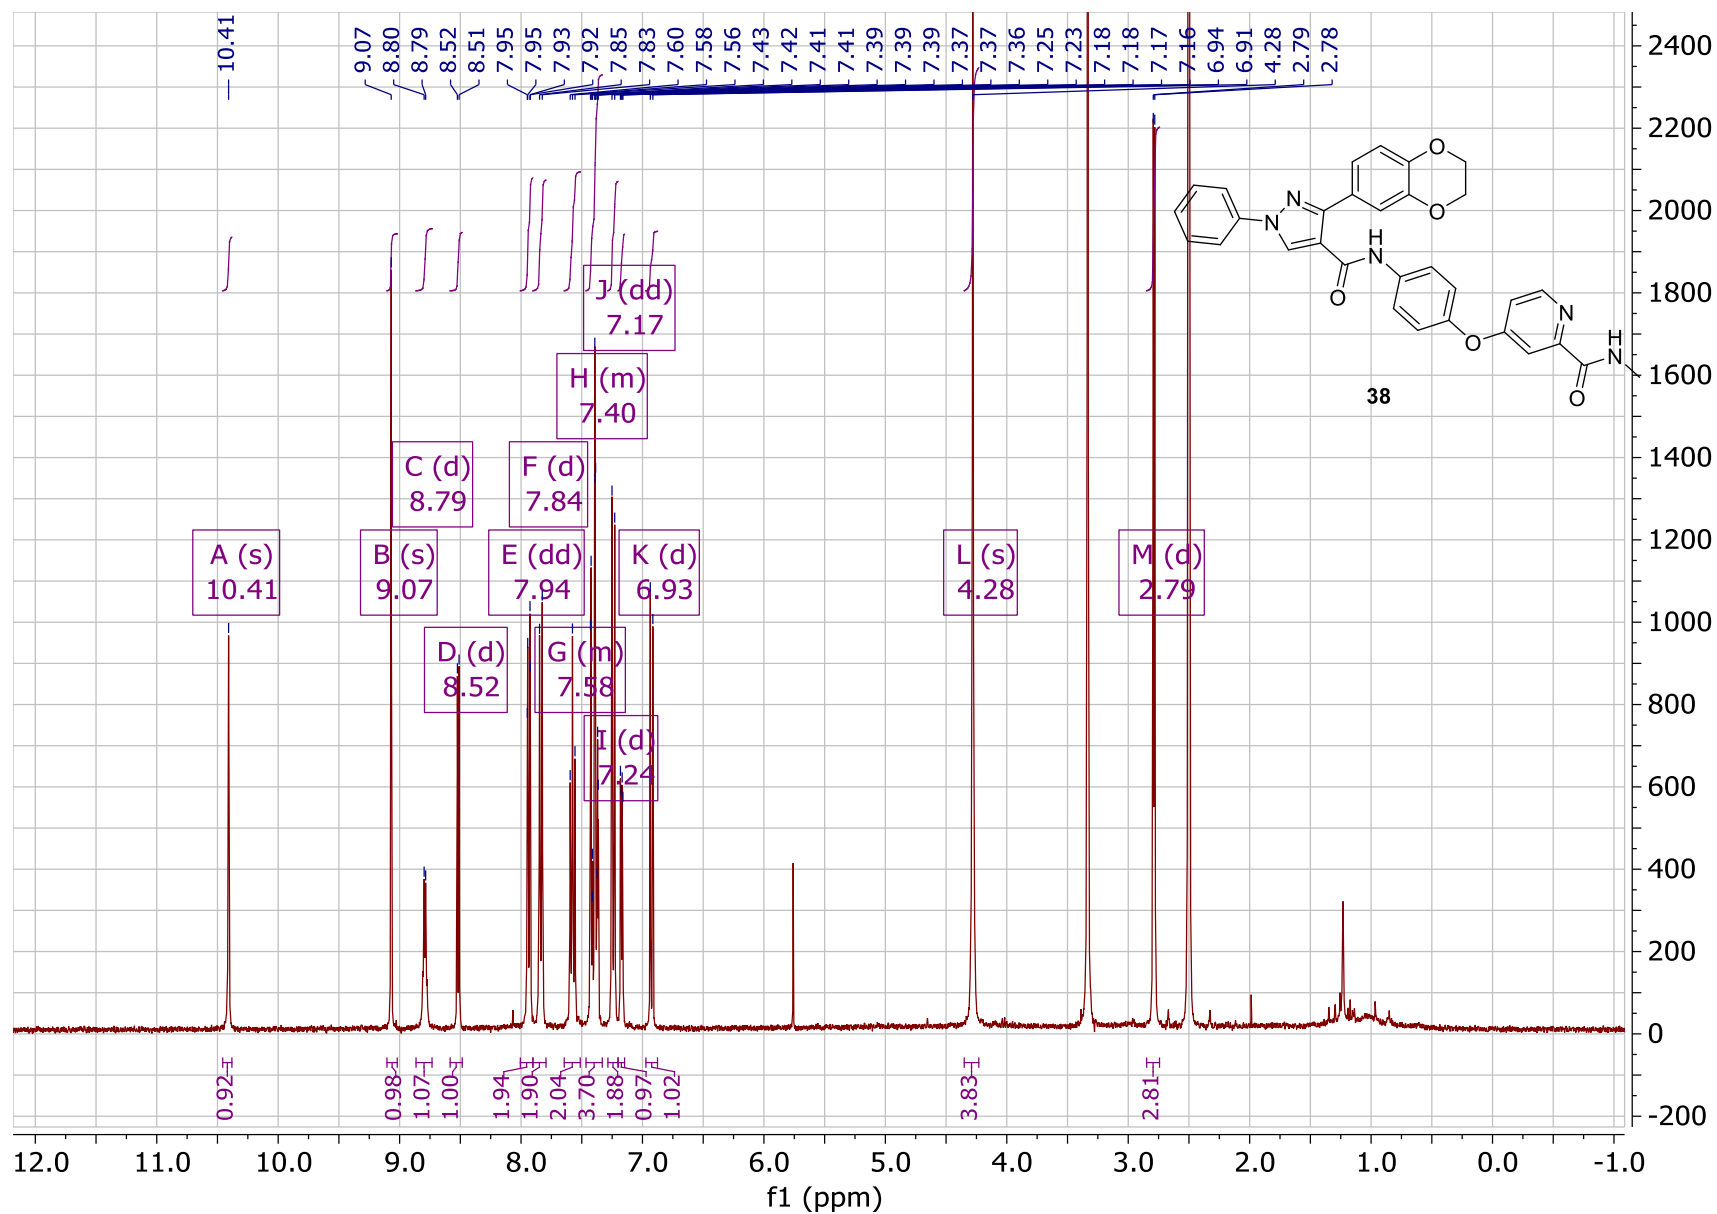



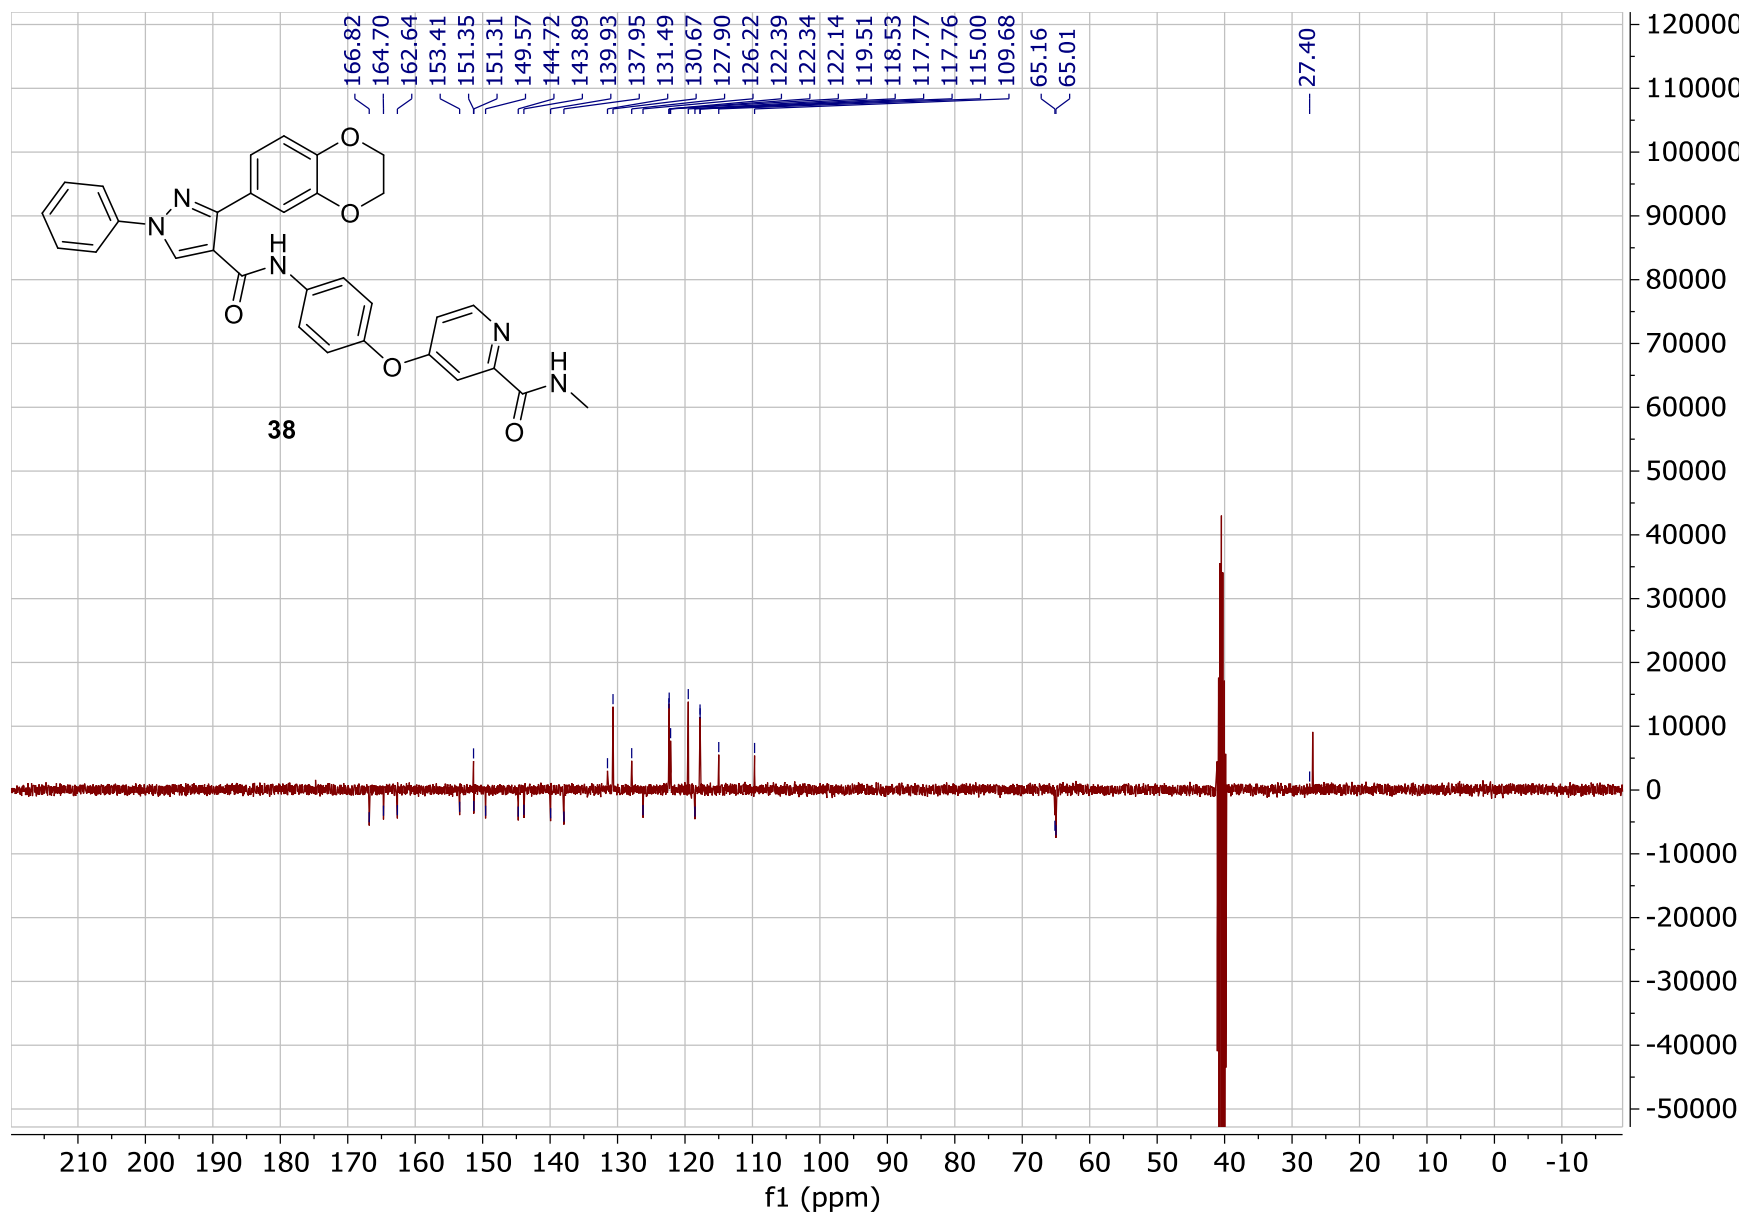

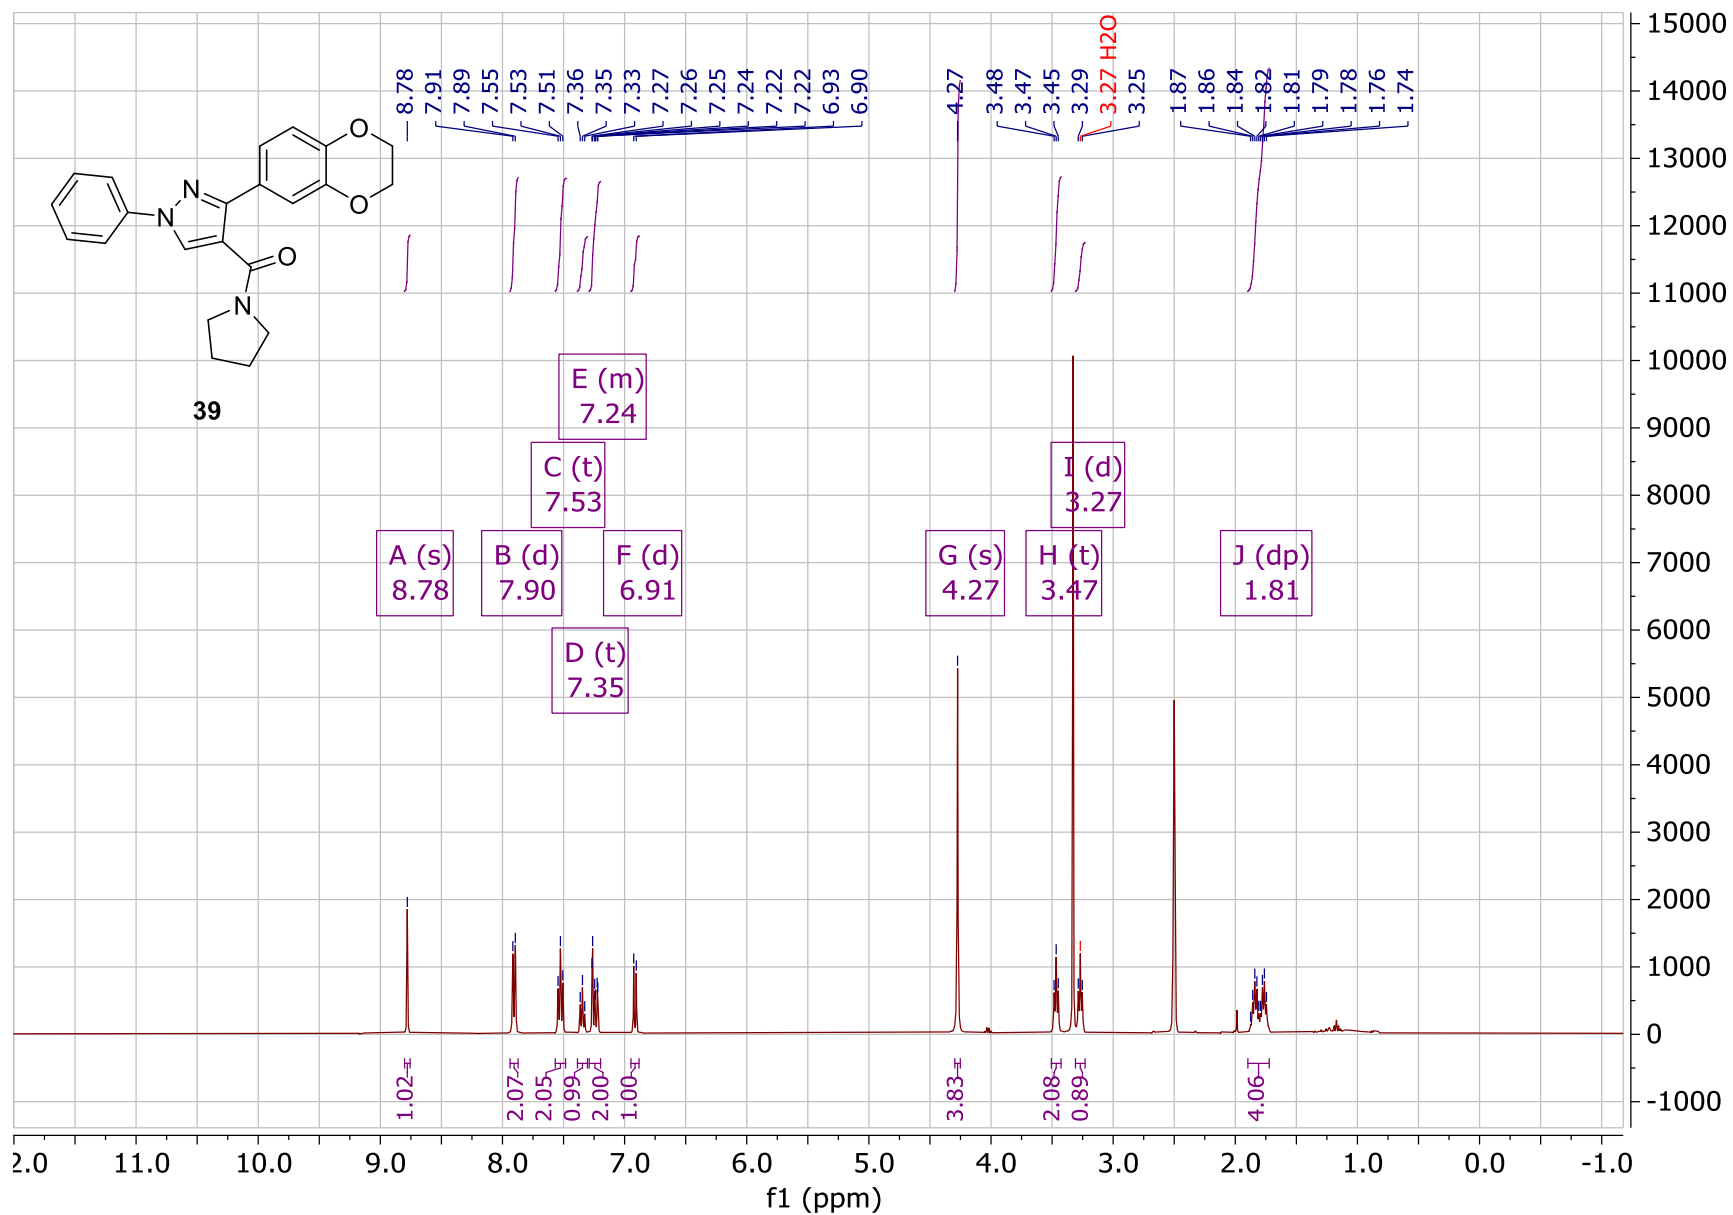

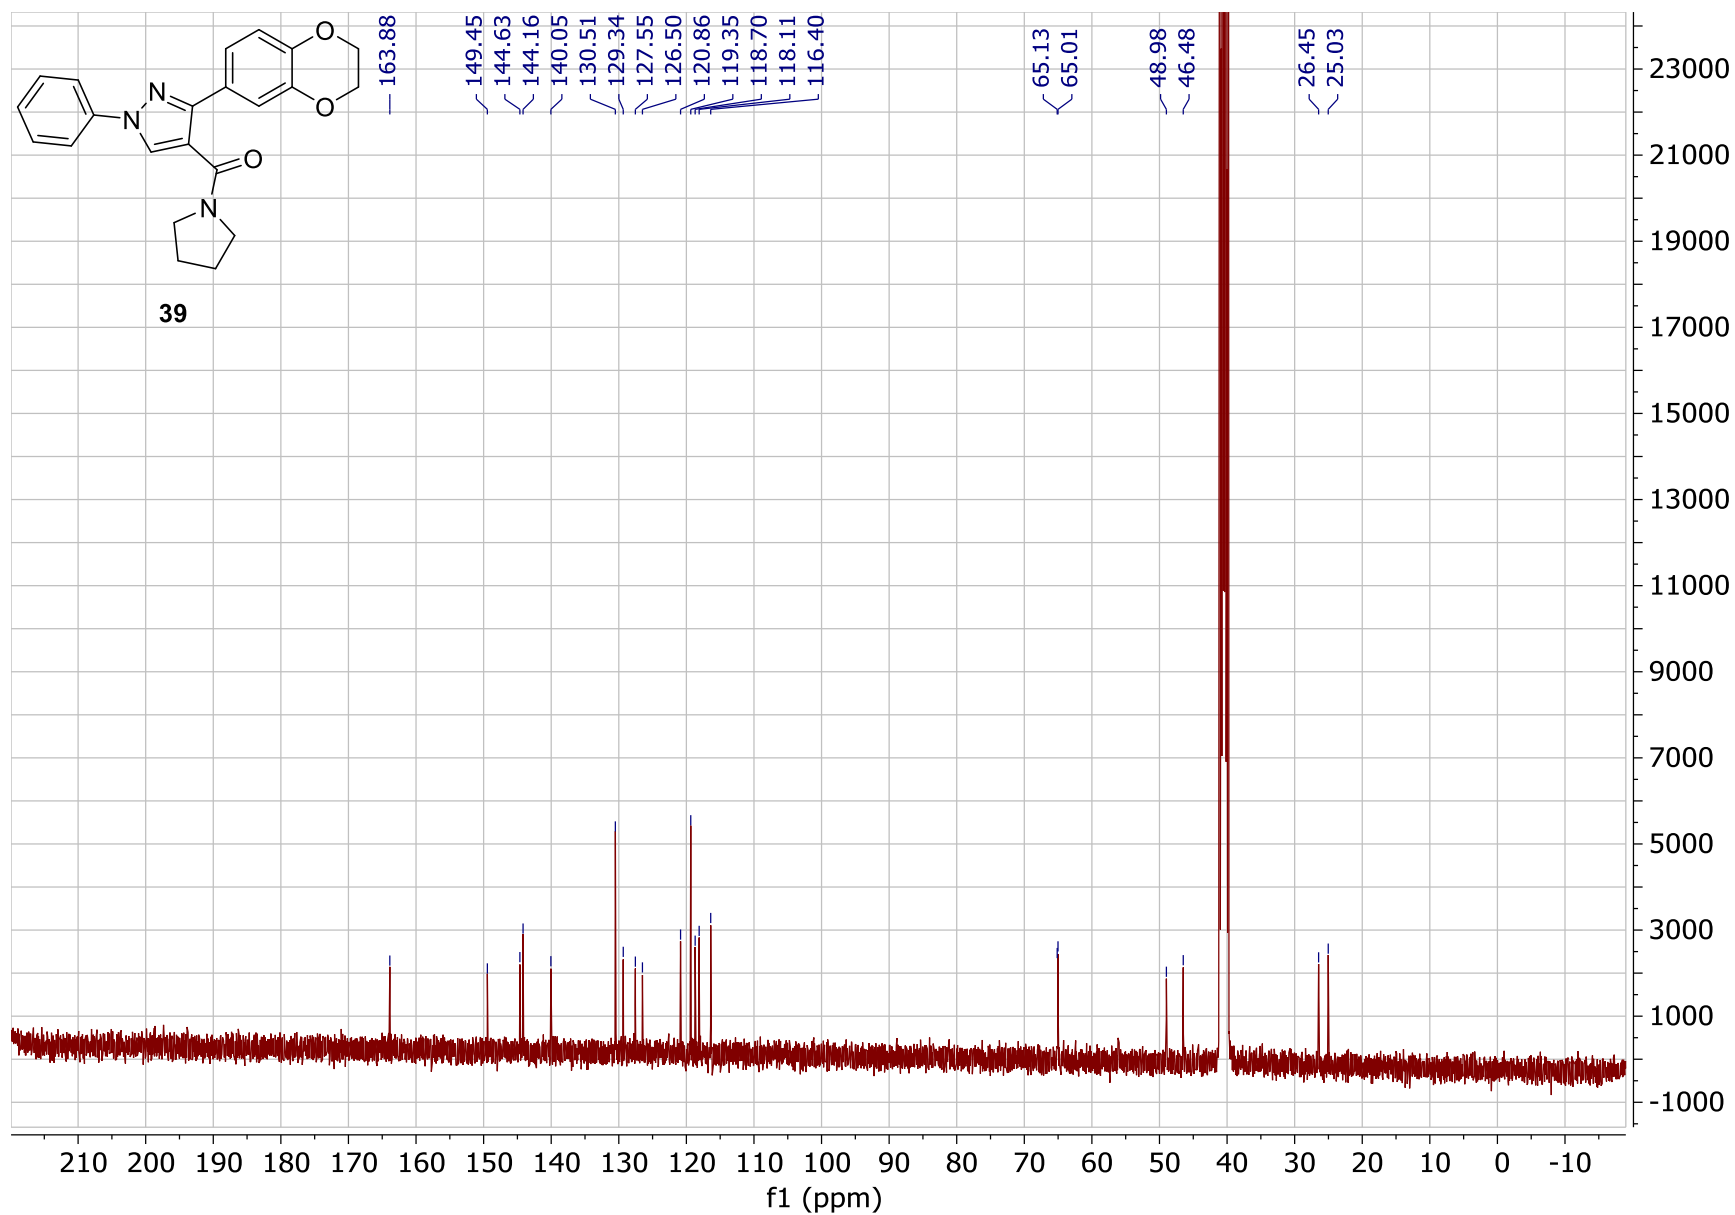

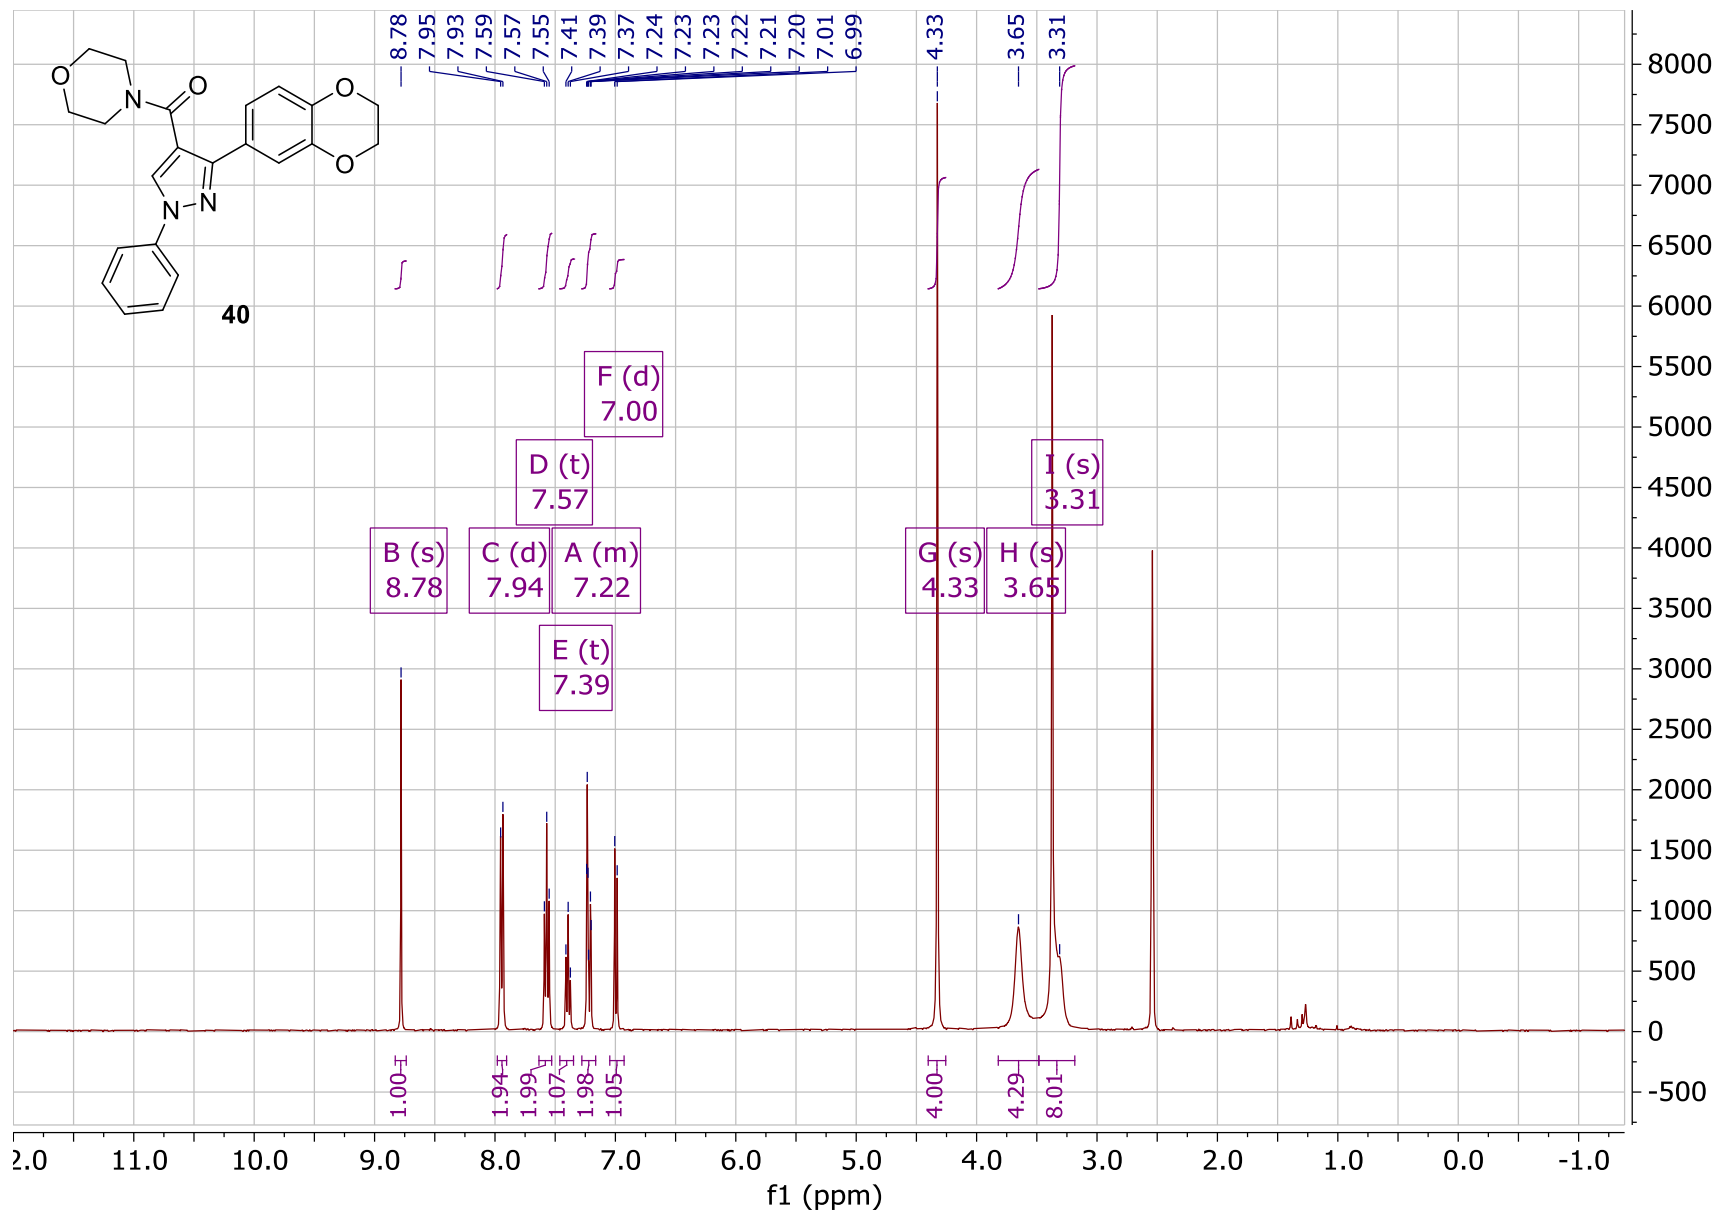

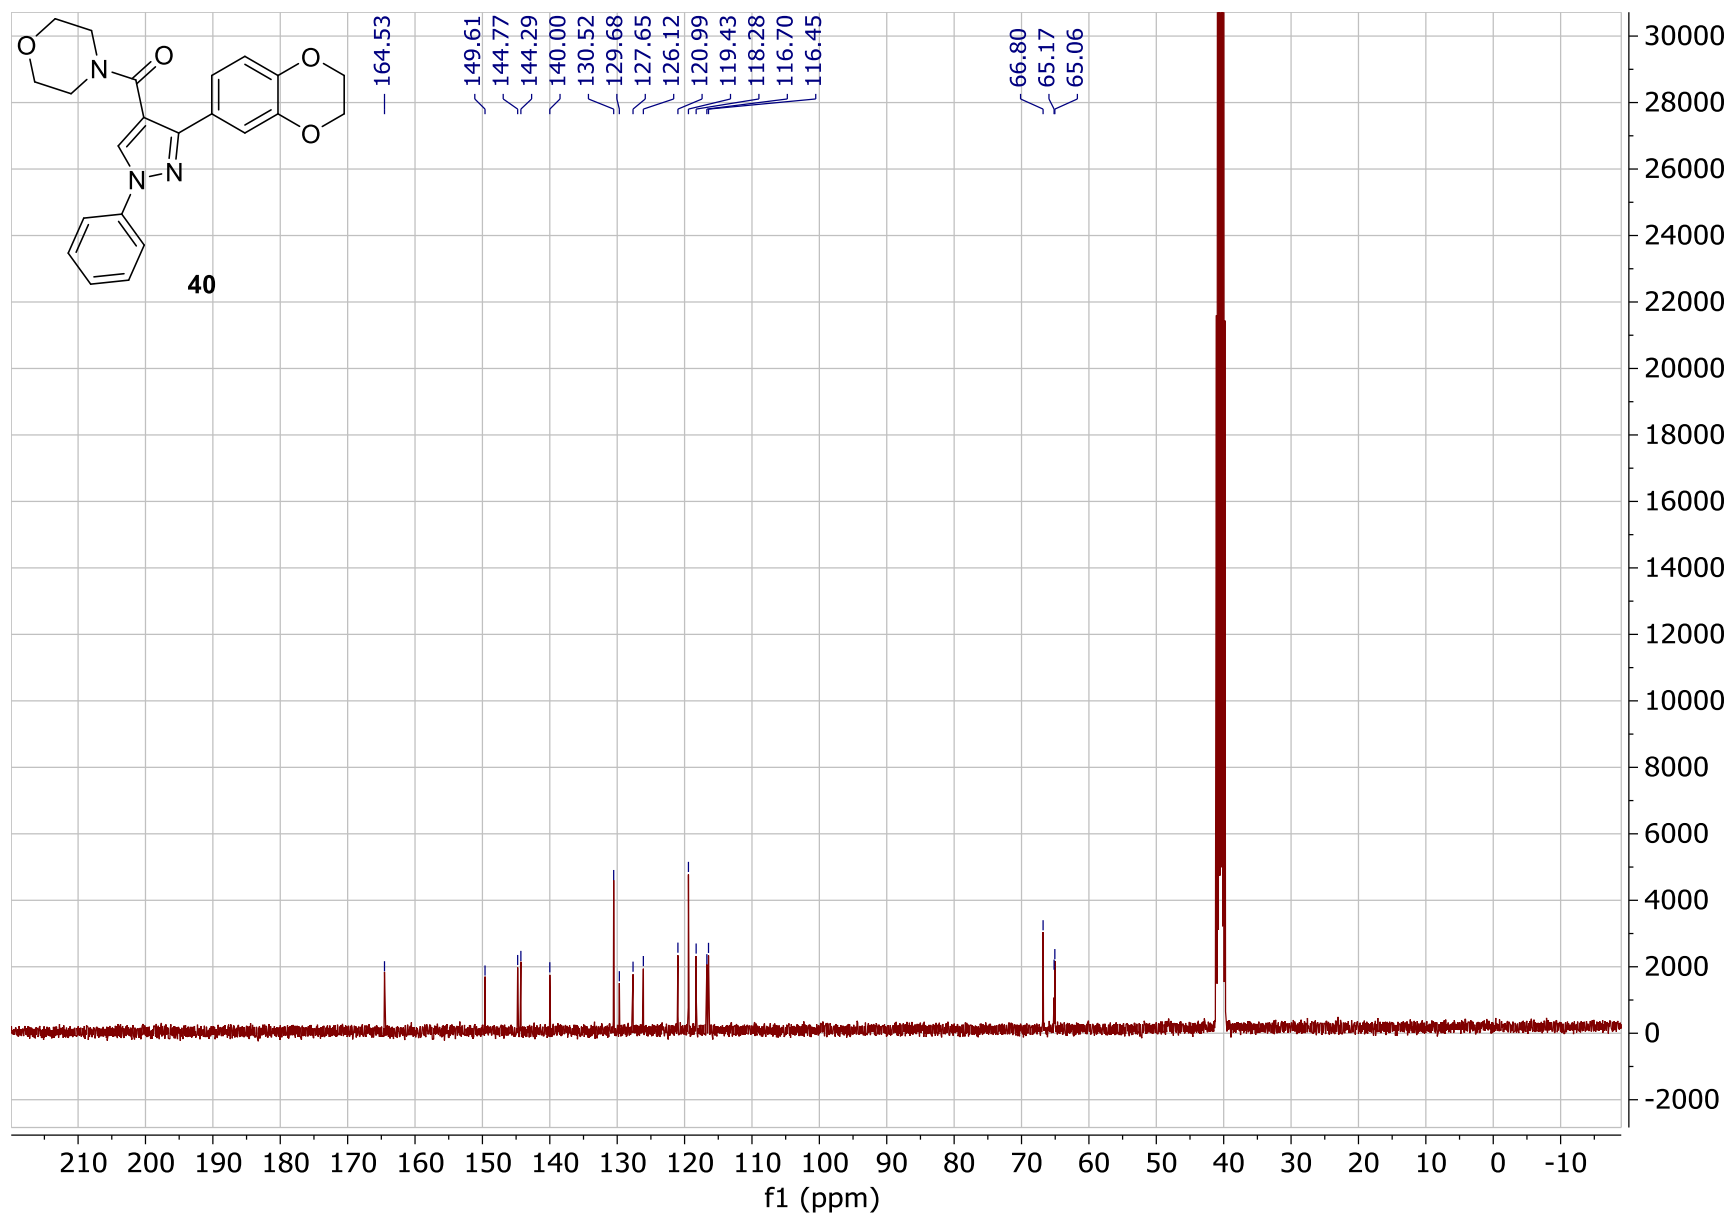

MB-2021-80B.10.fid

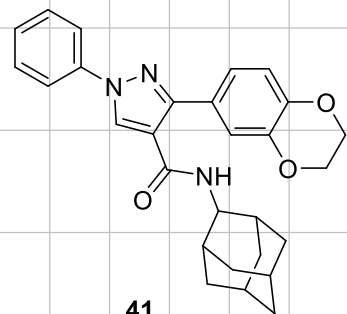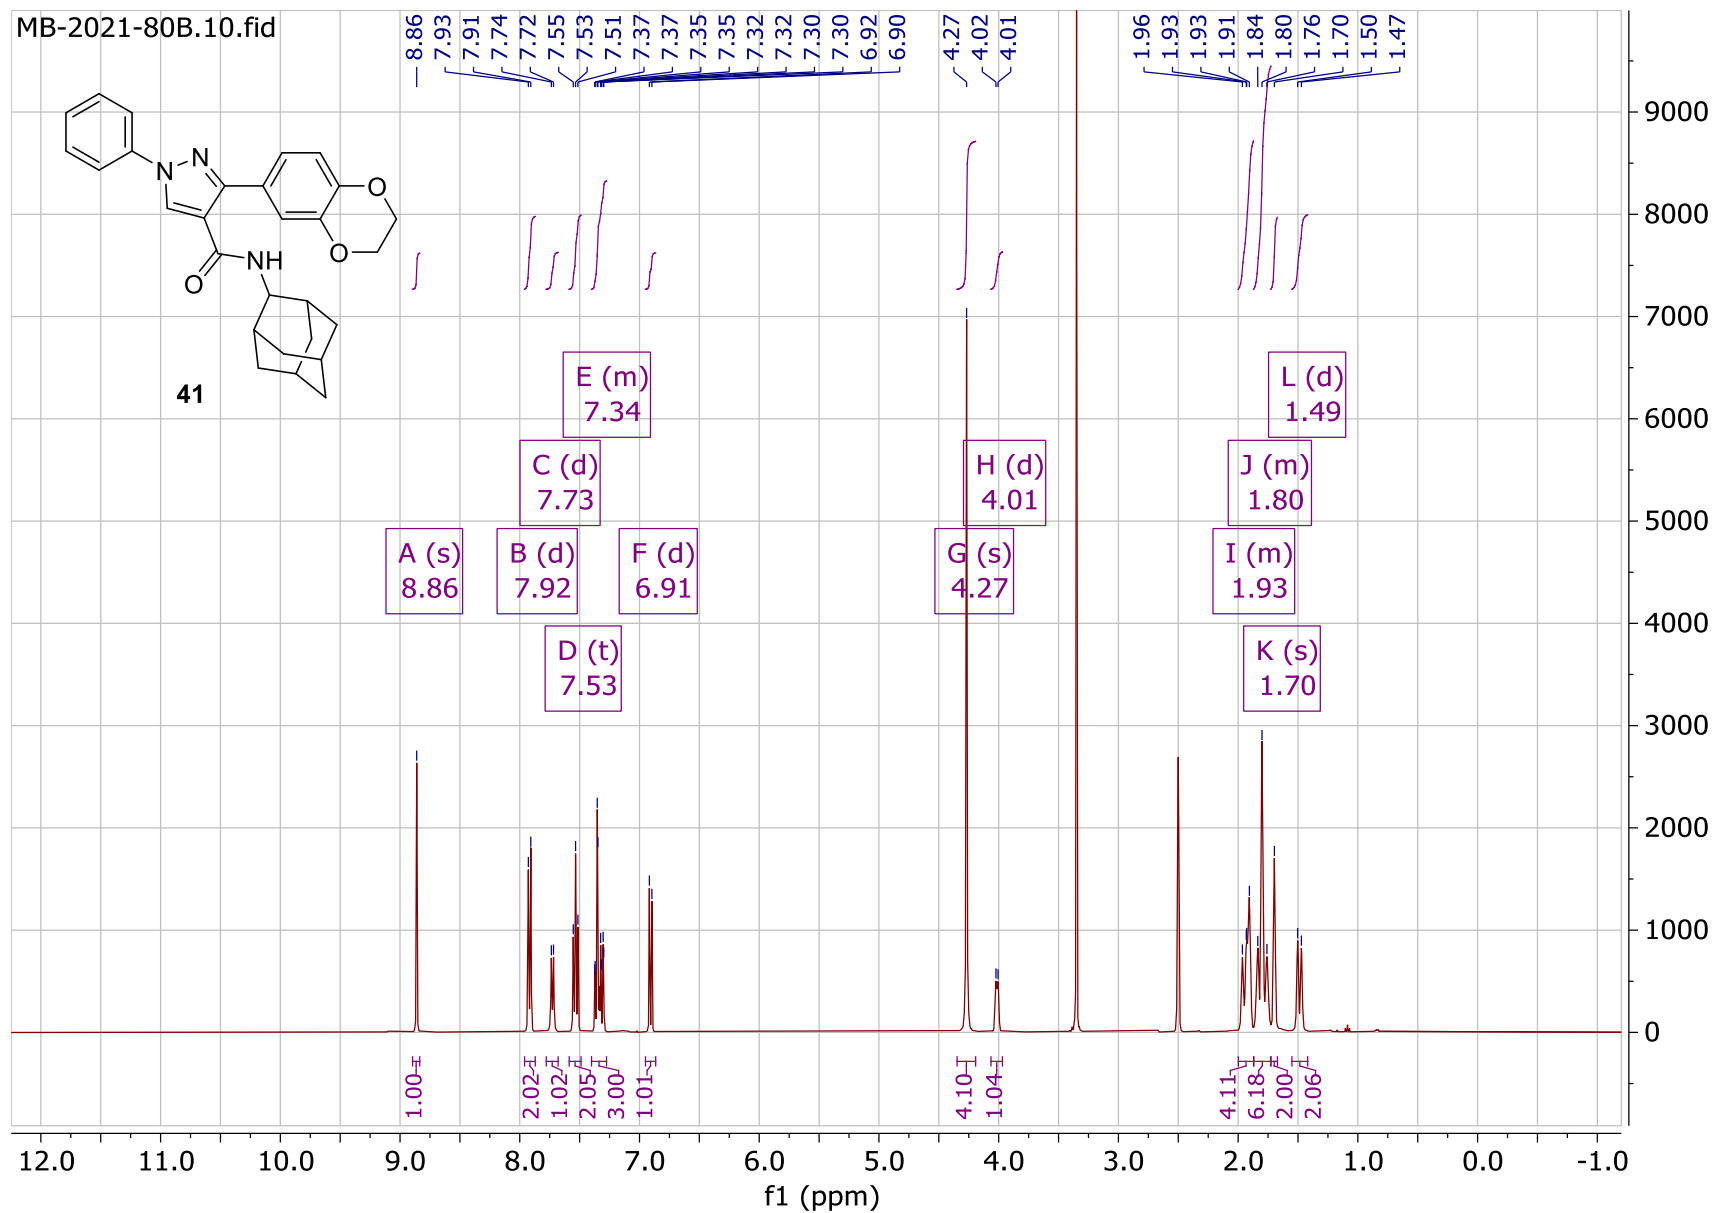

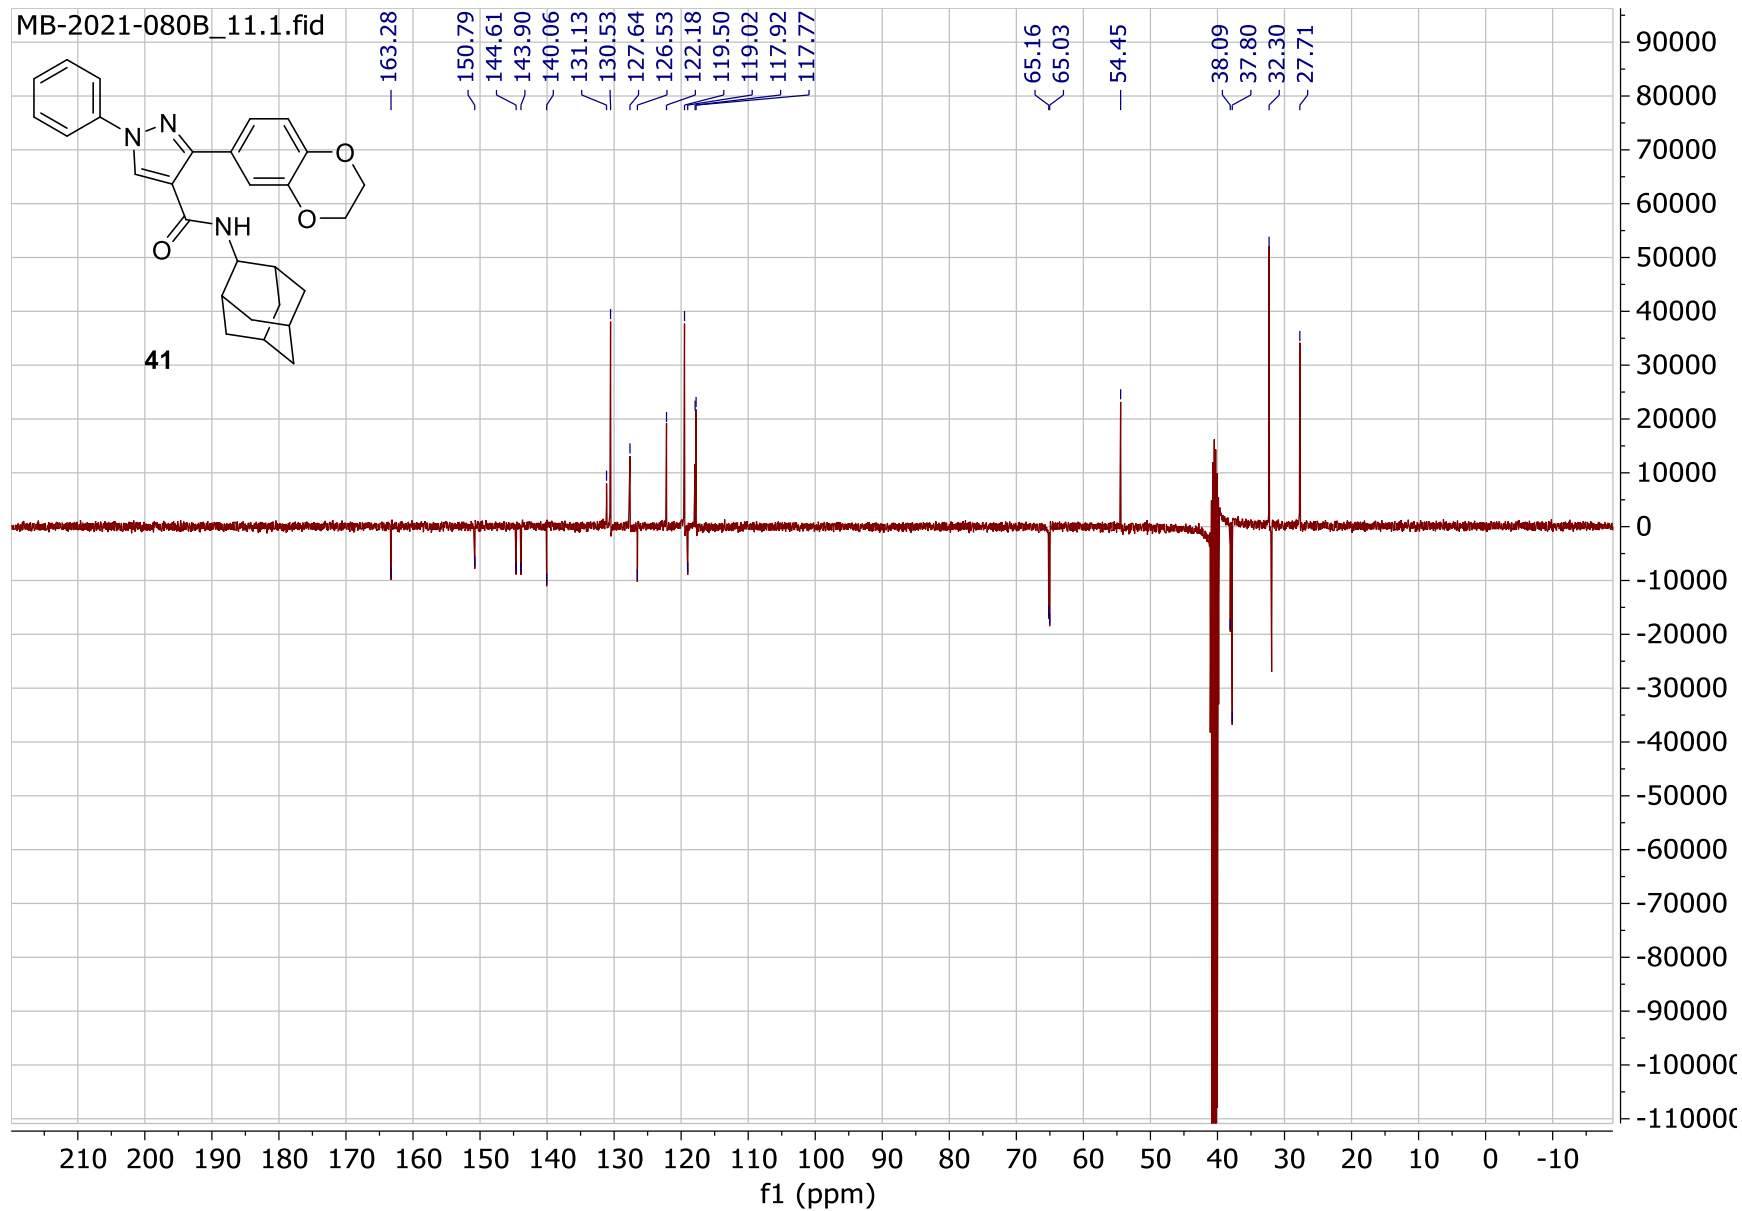

MB-2021-075 oxalate.20.fid

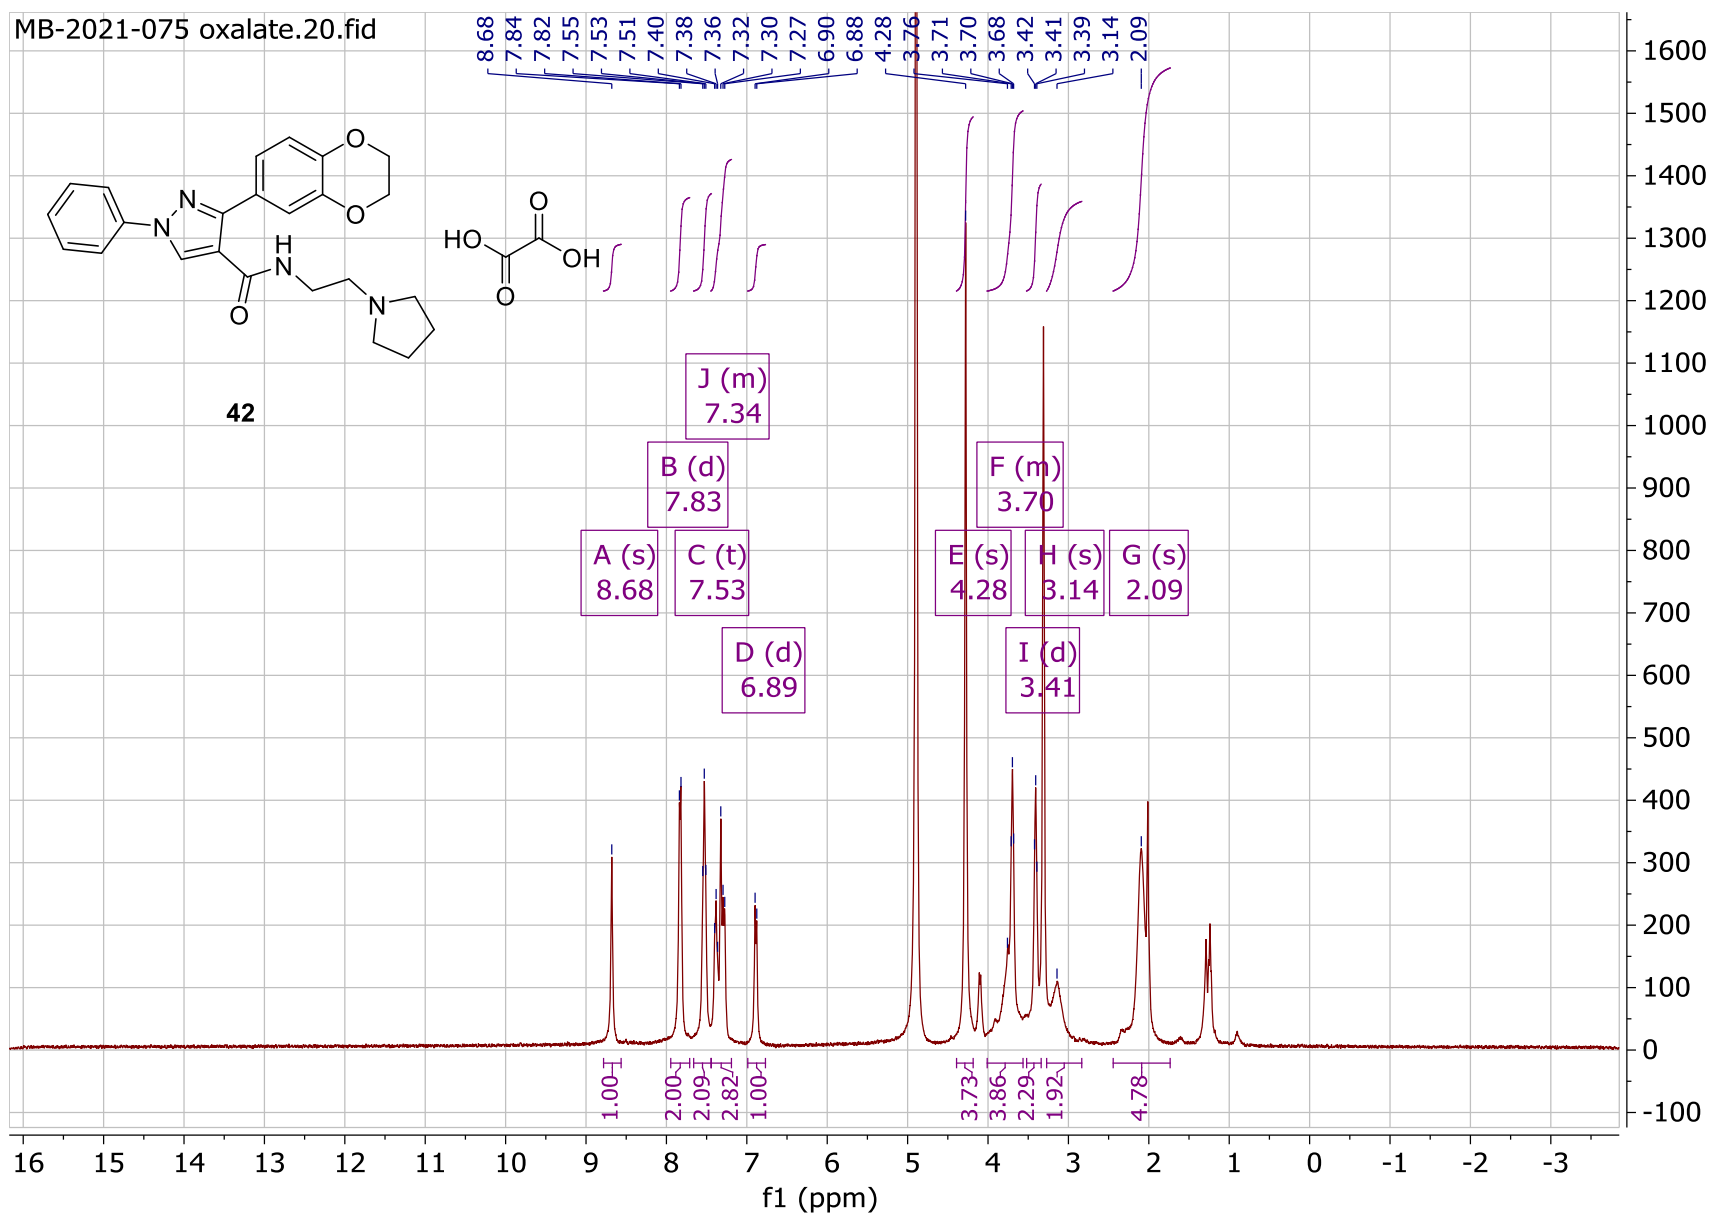



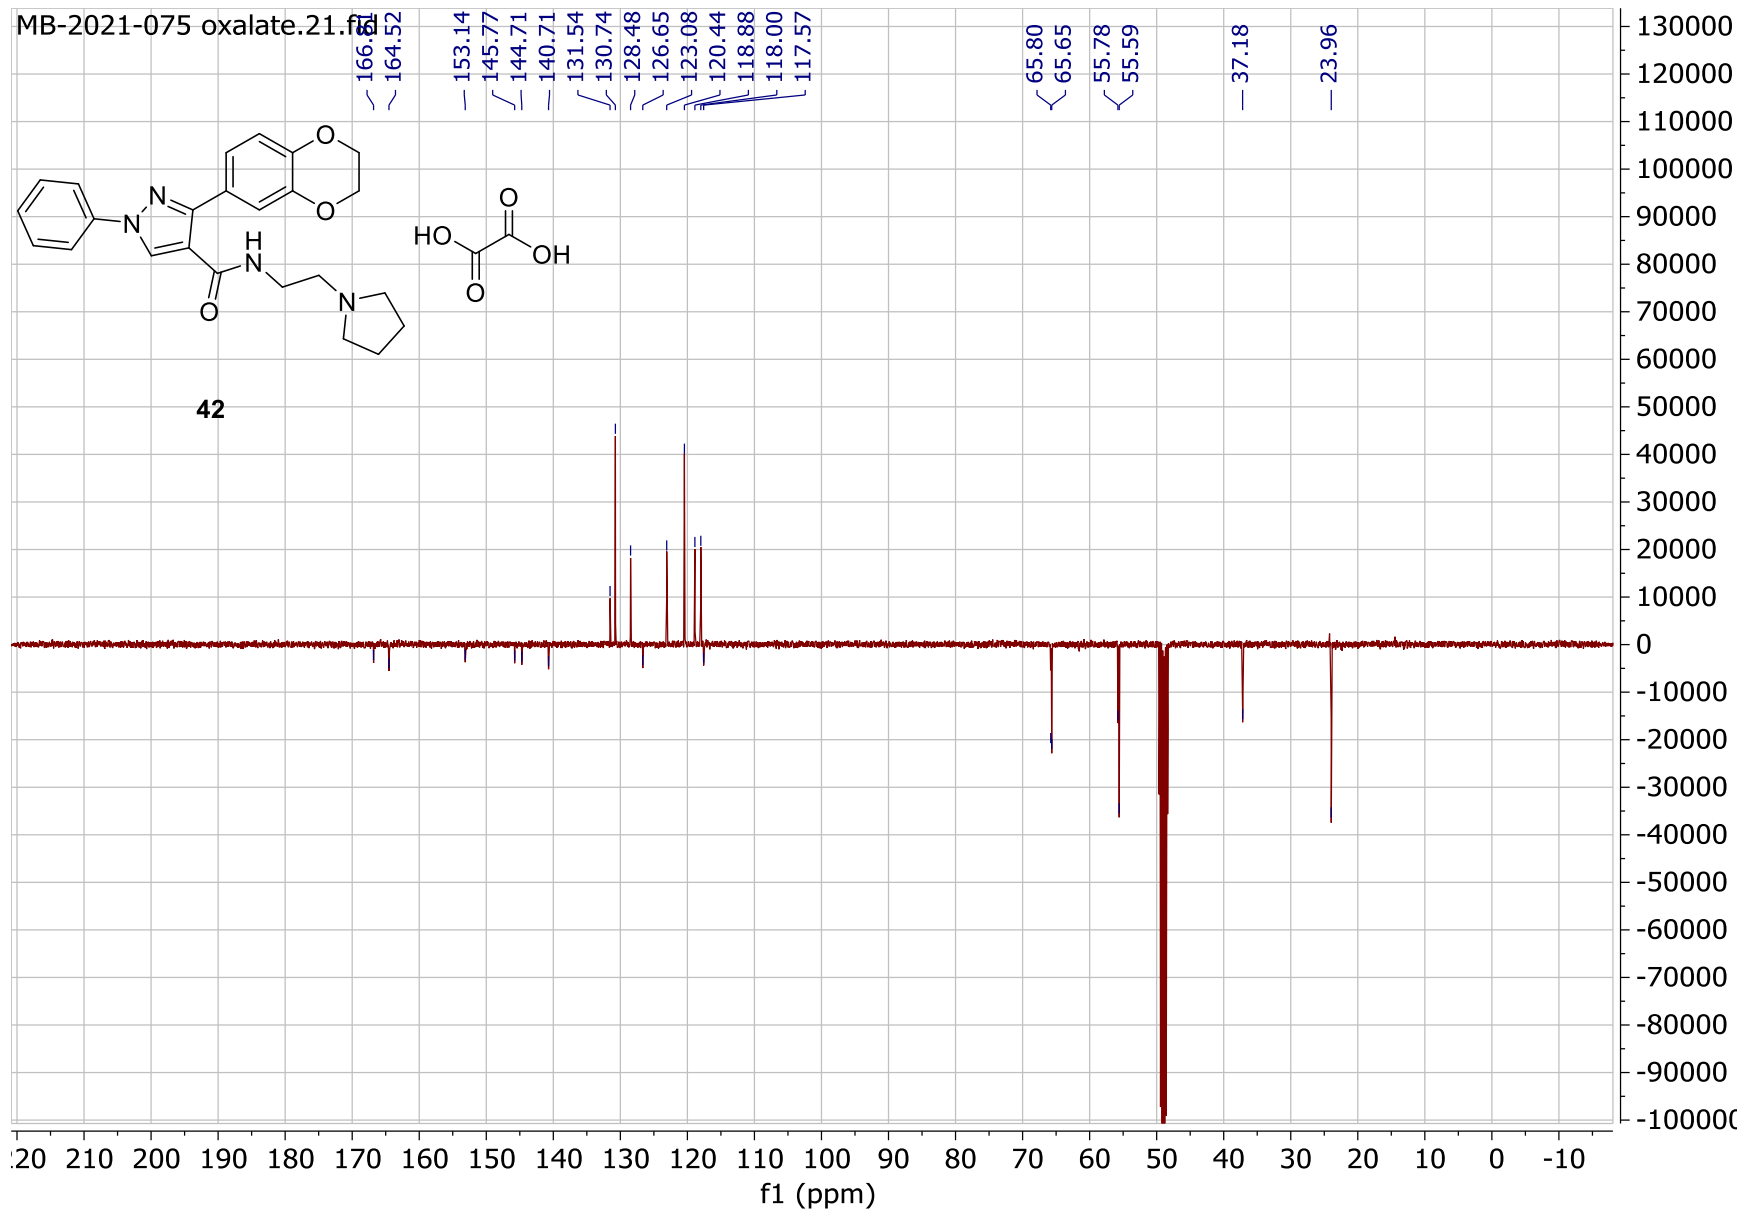

MB-2021-076.20.fid

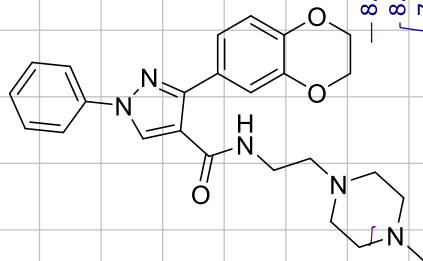

43

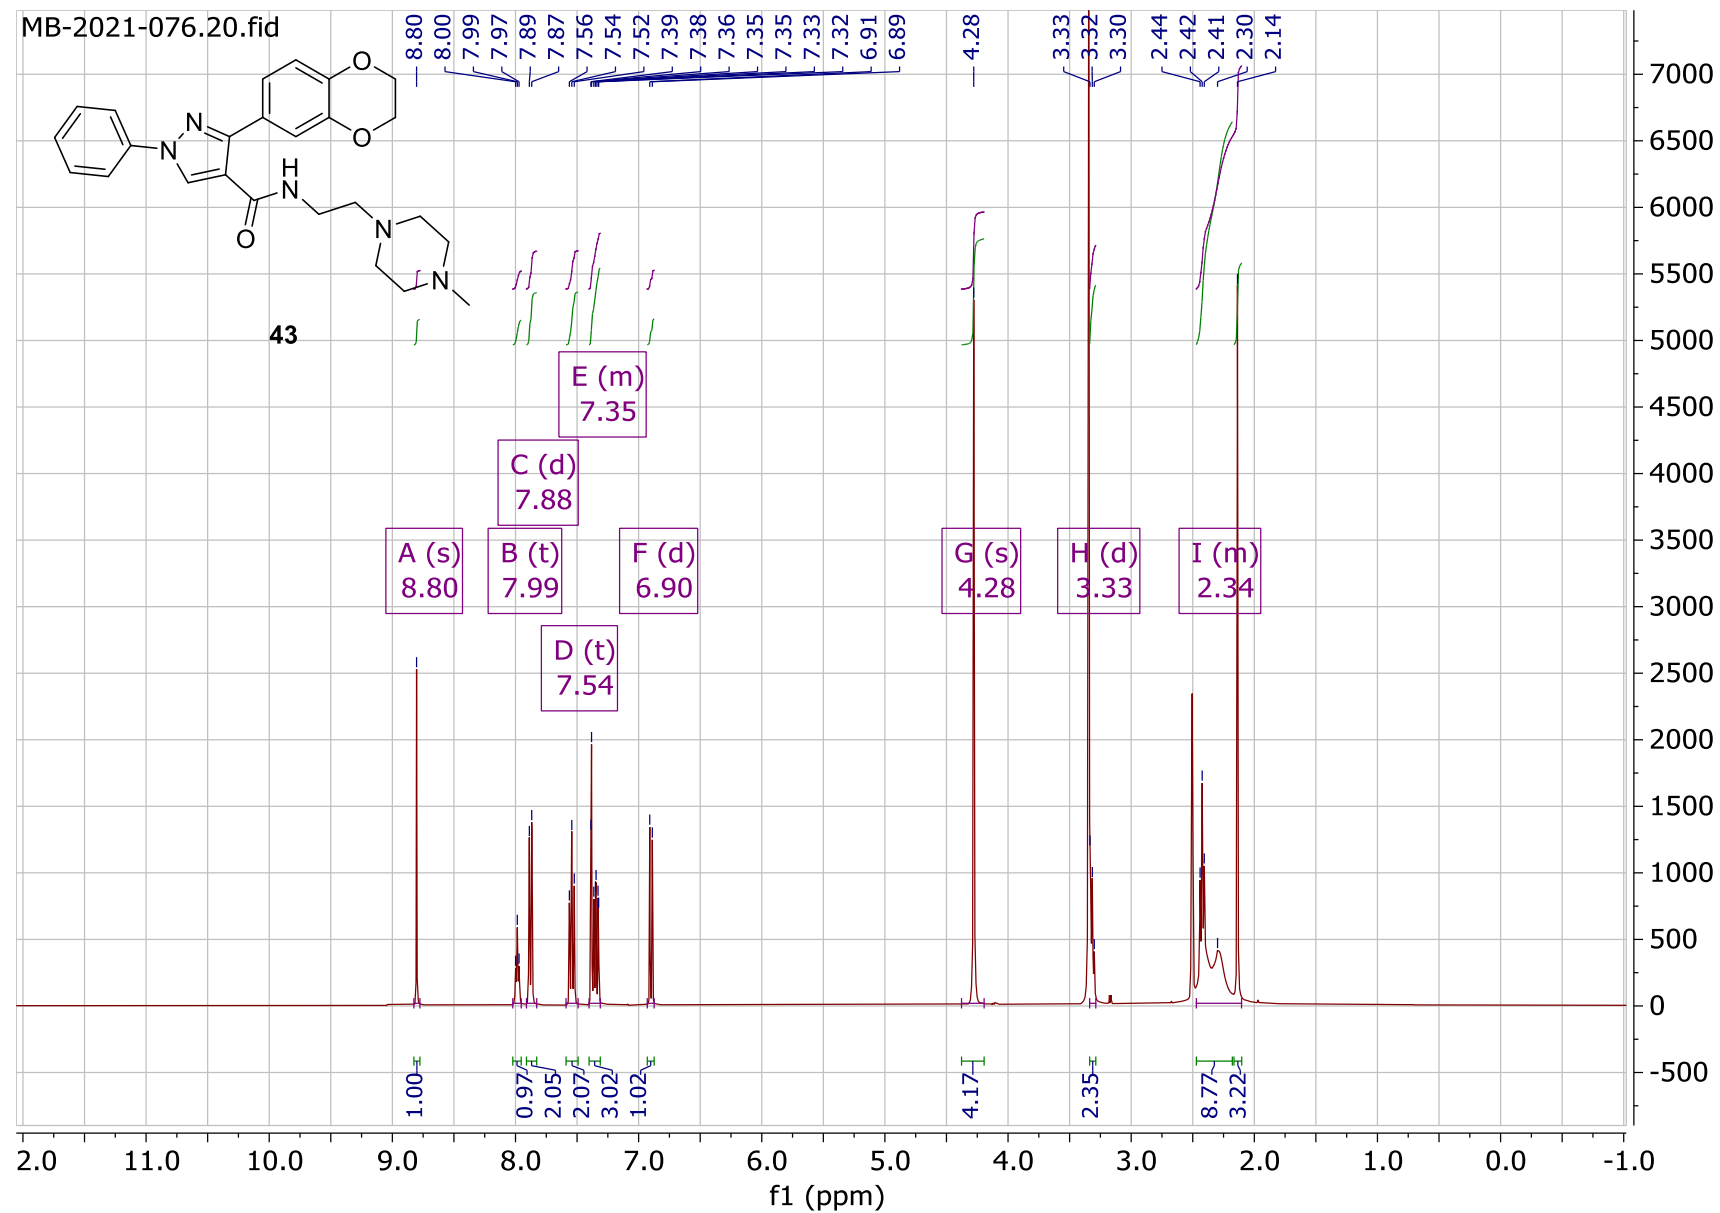

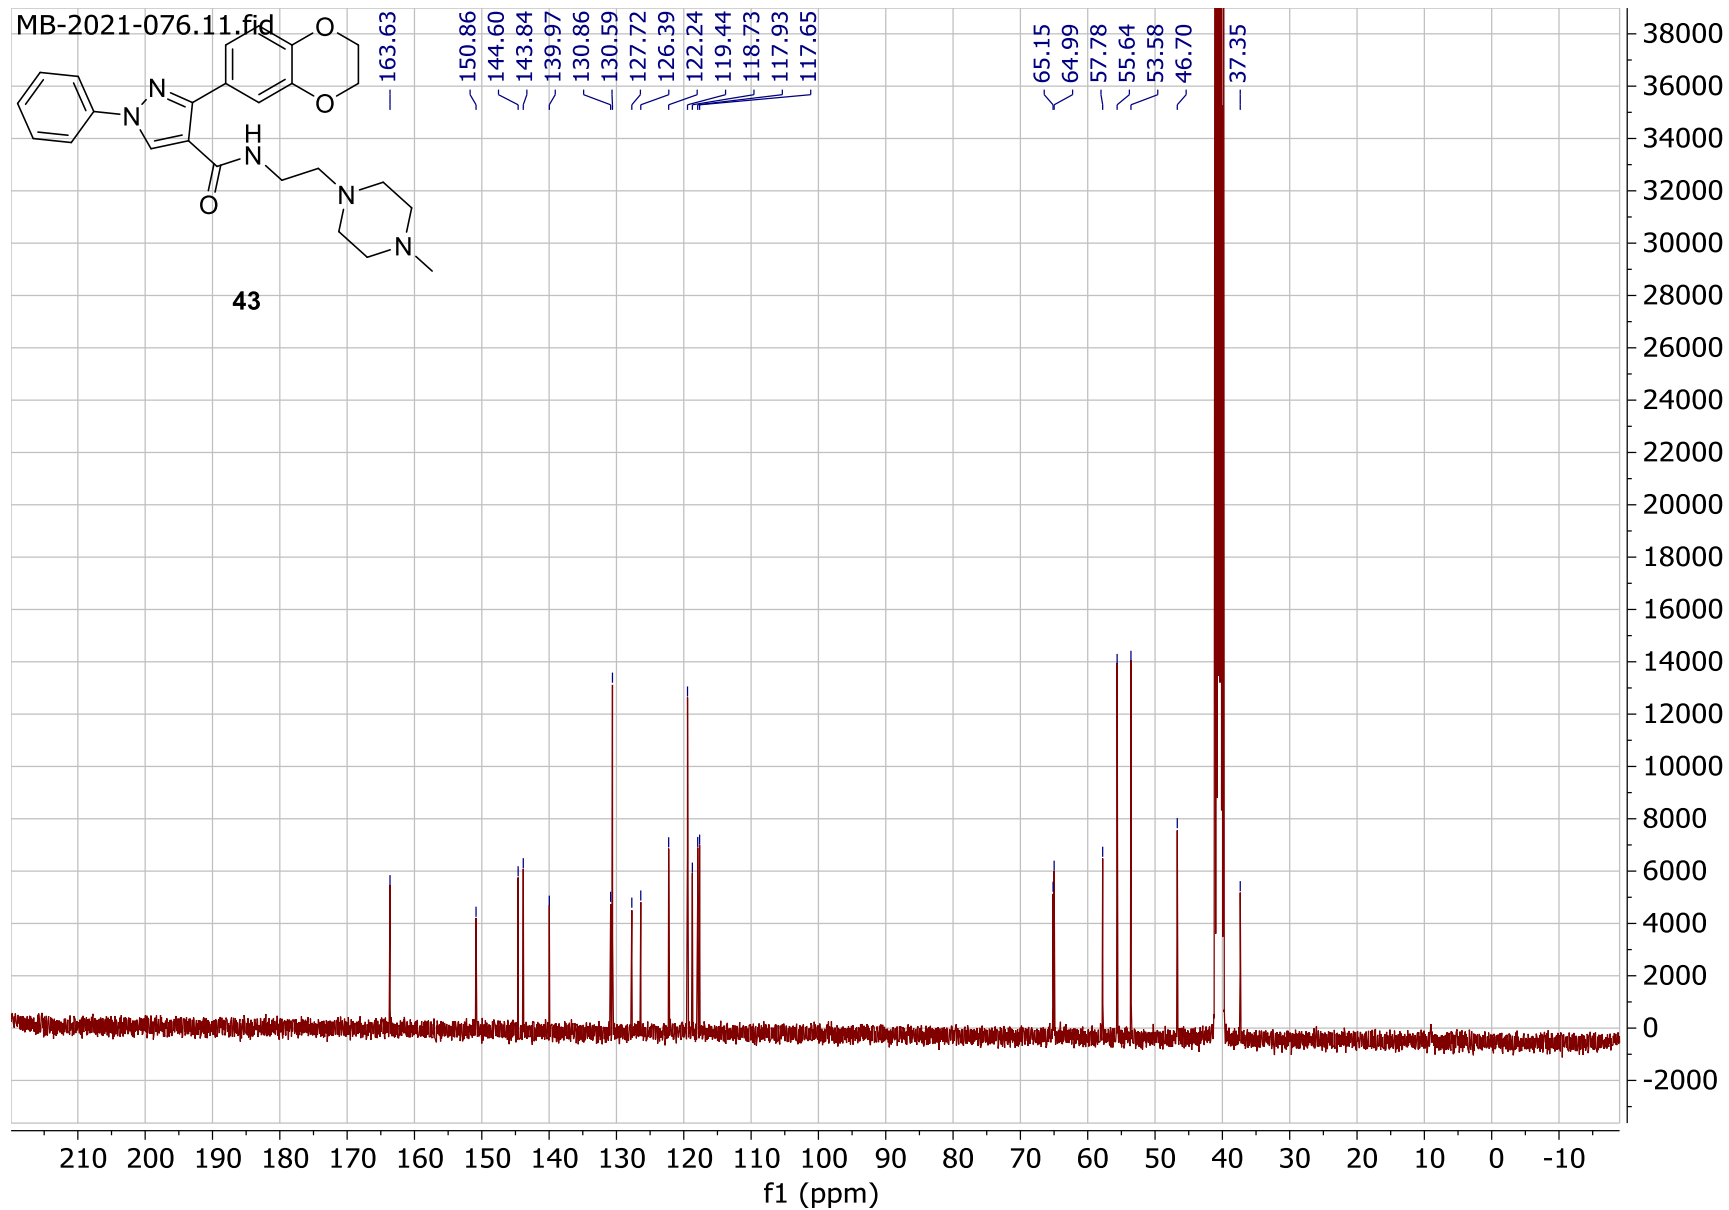

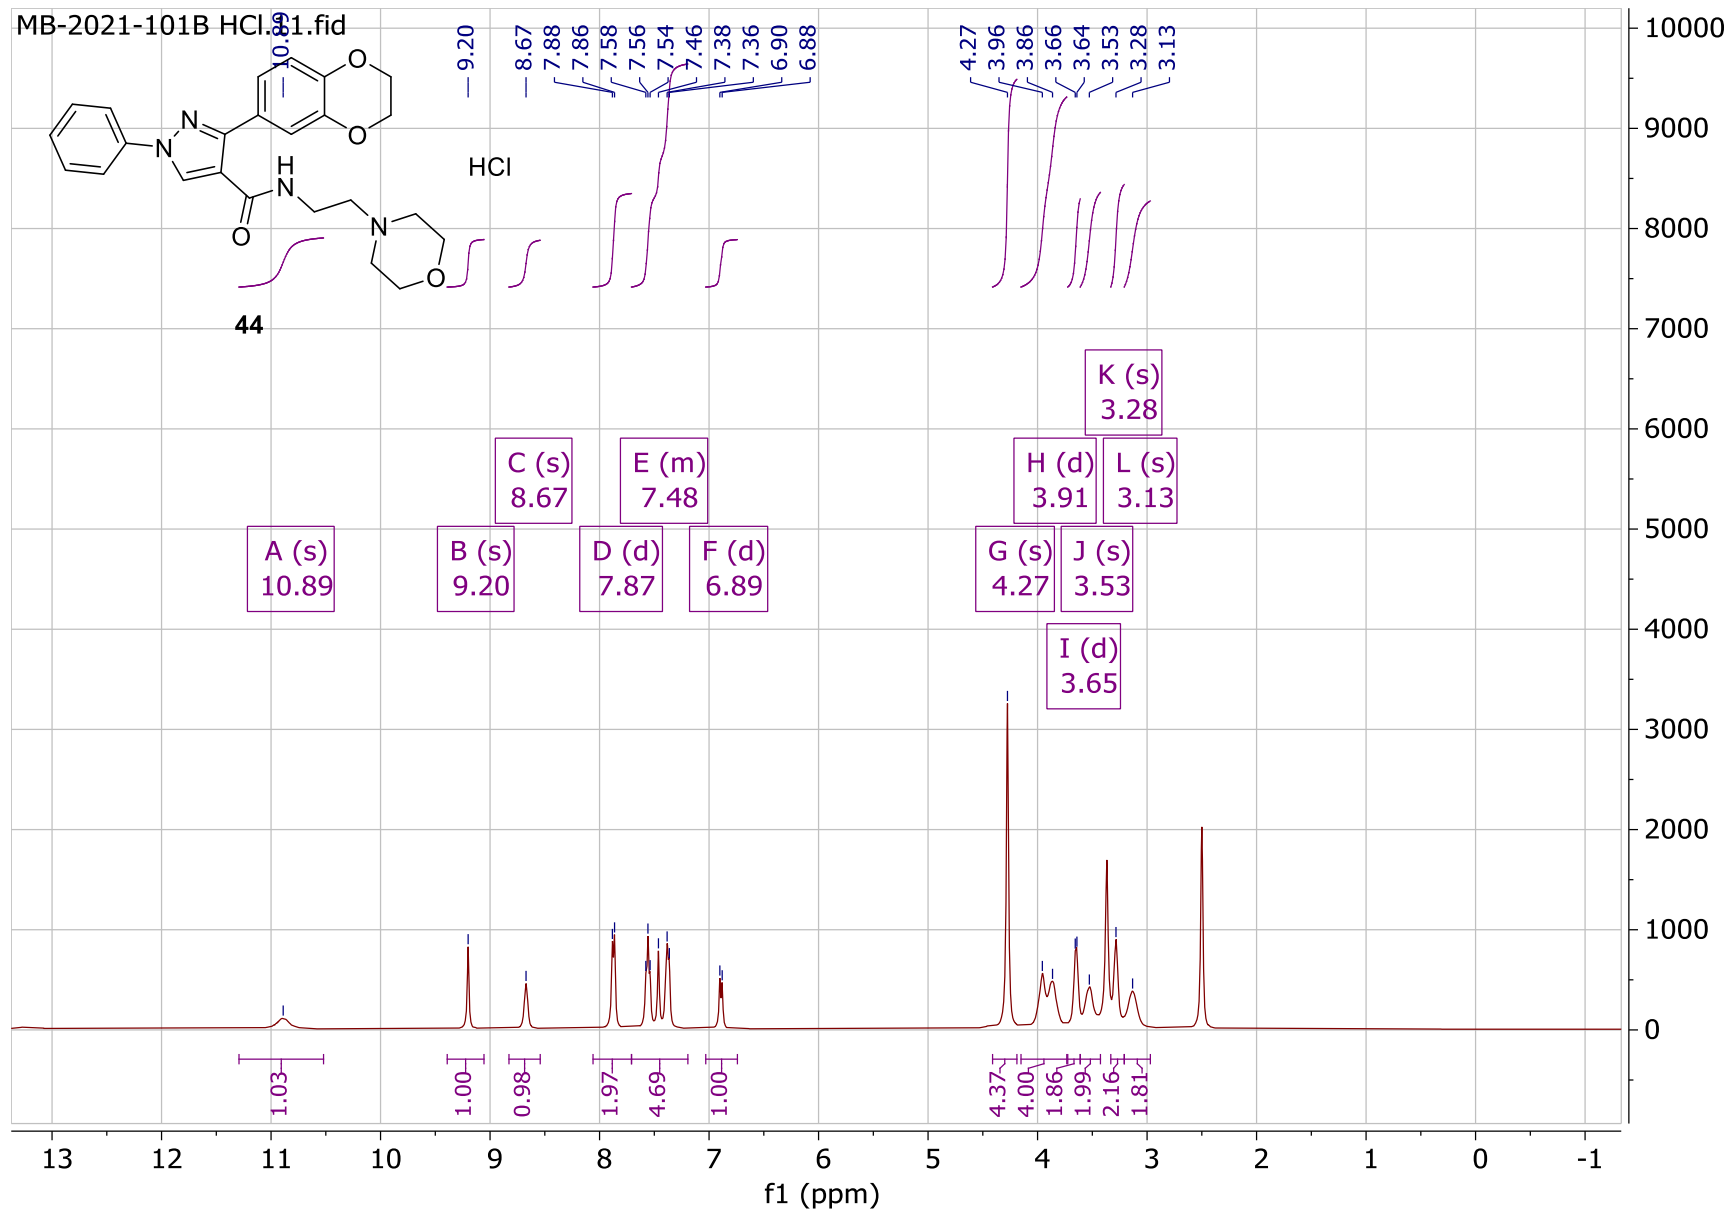

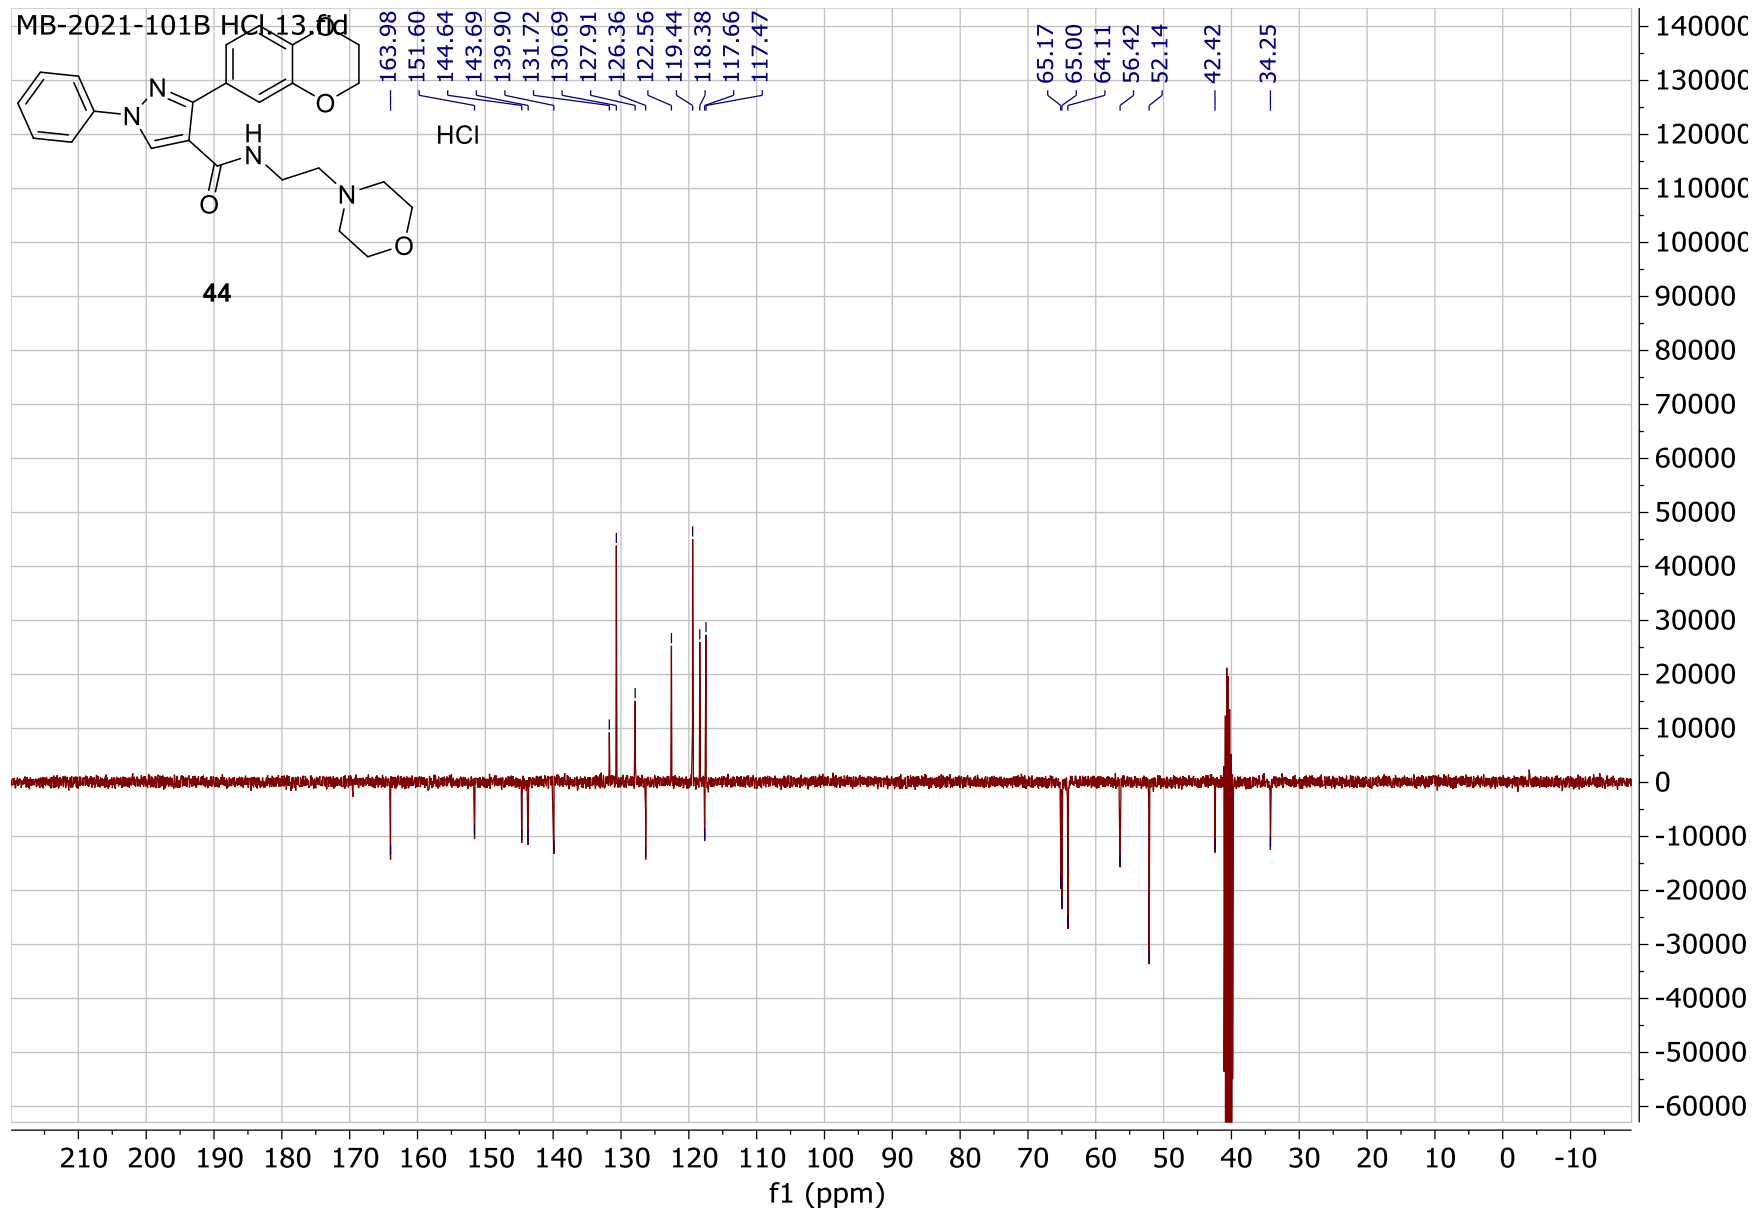

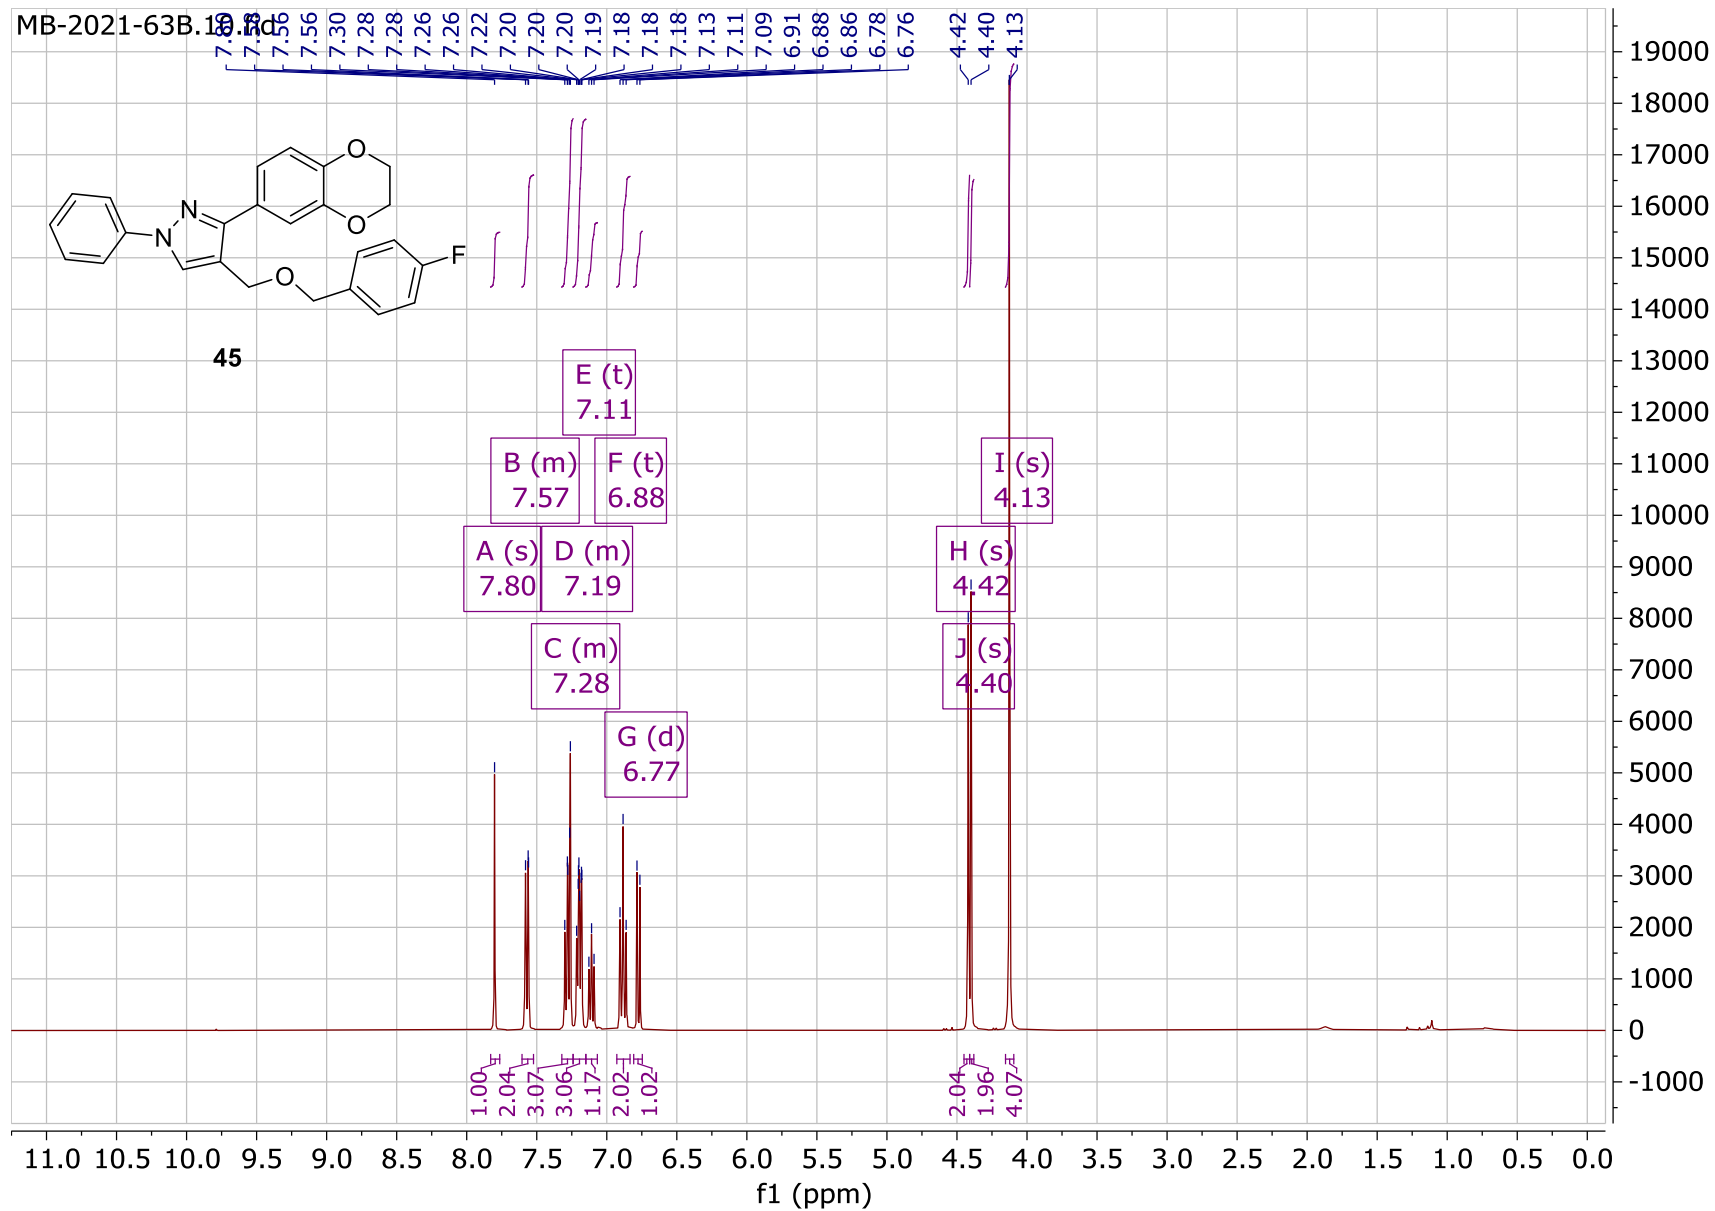

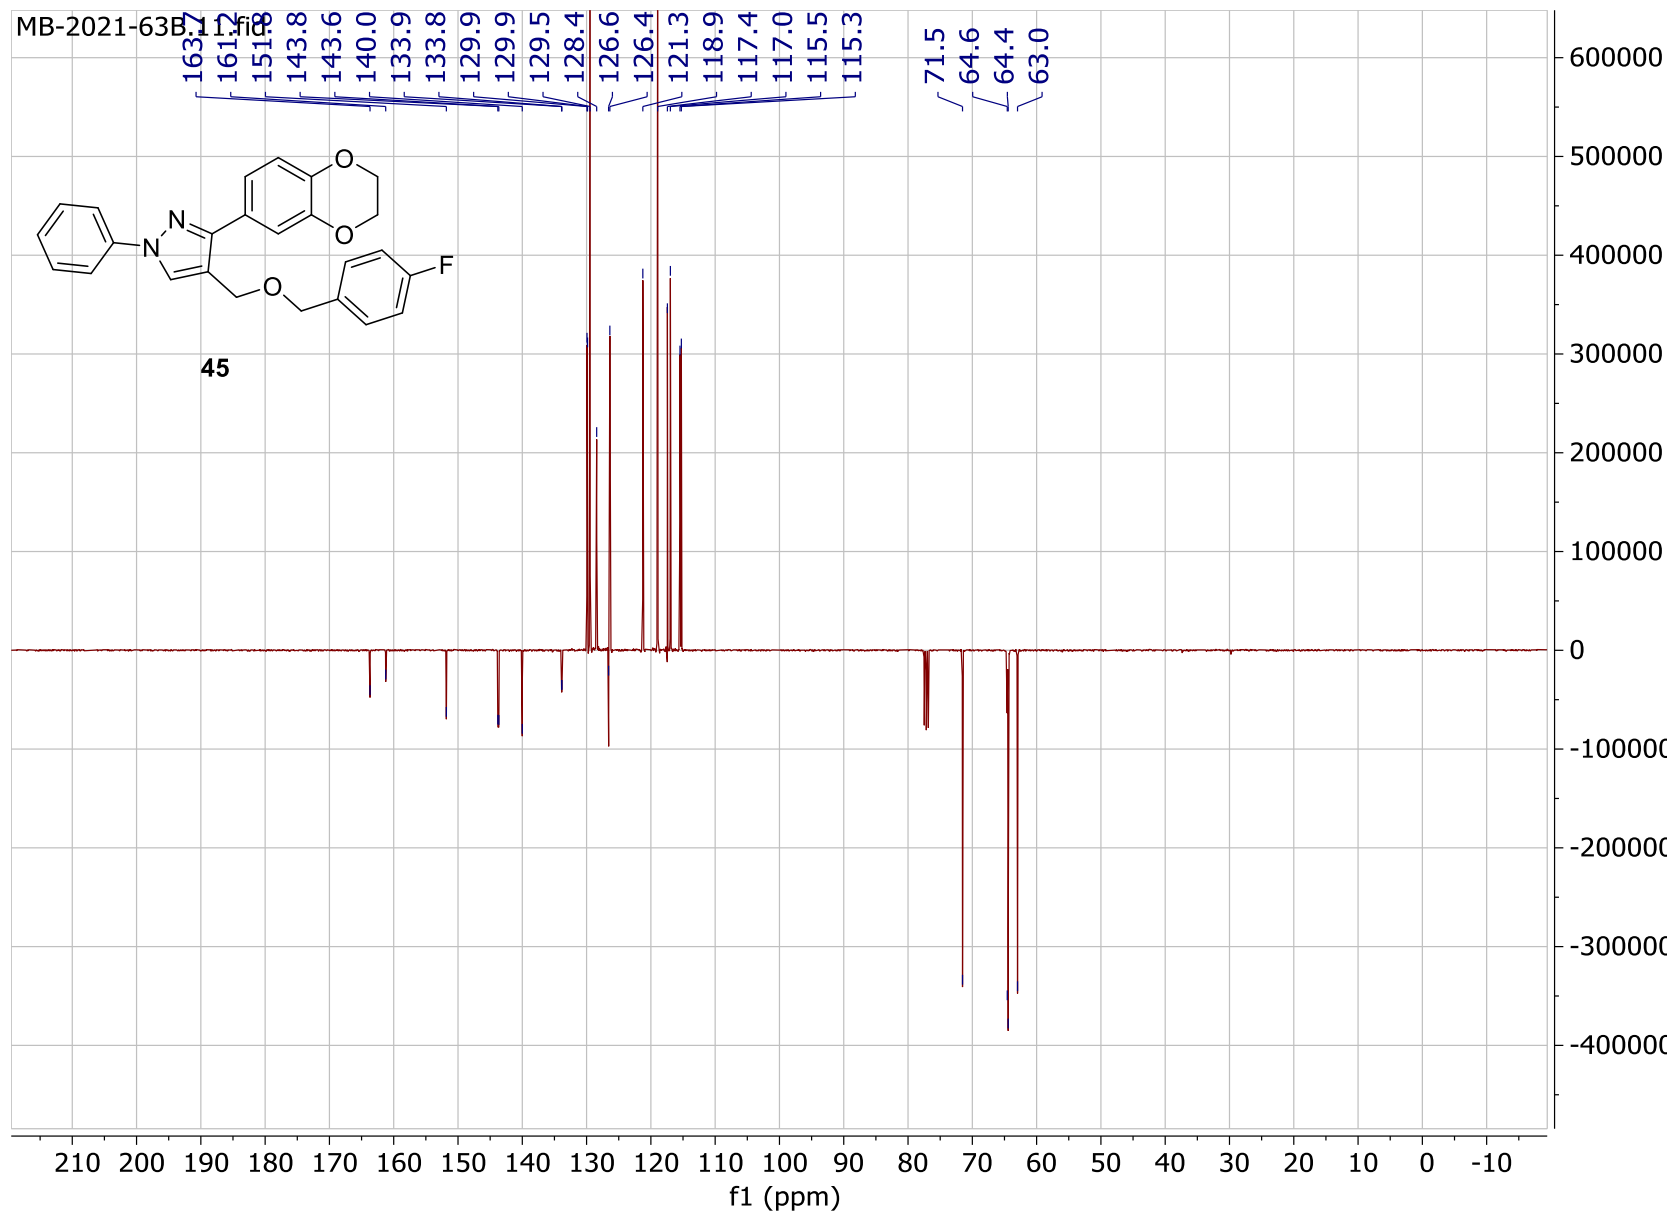

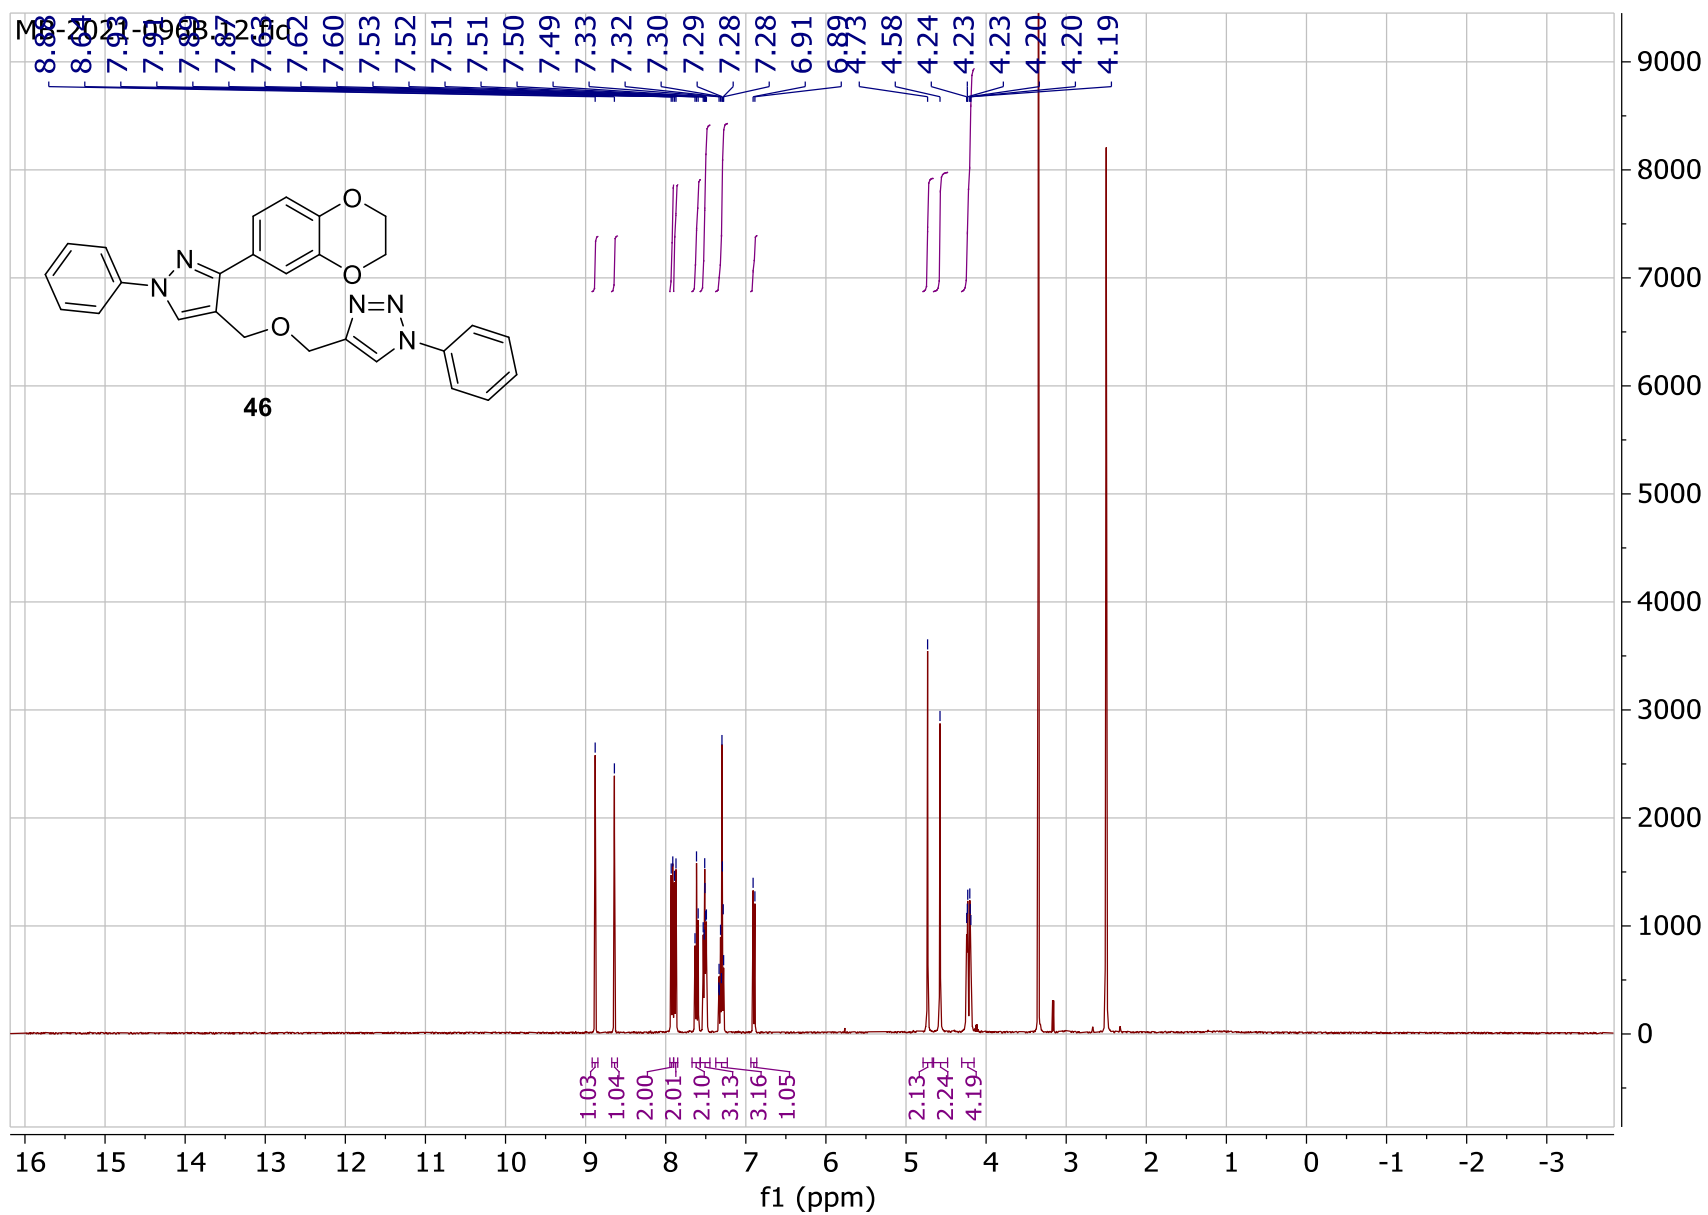



MB-2021-096B.13.fid

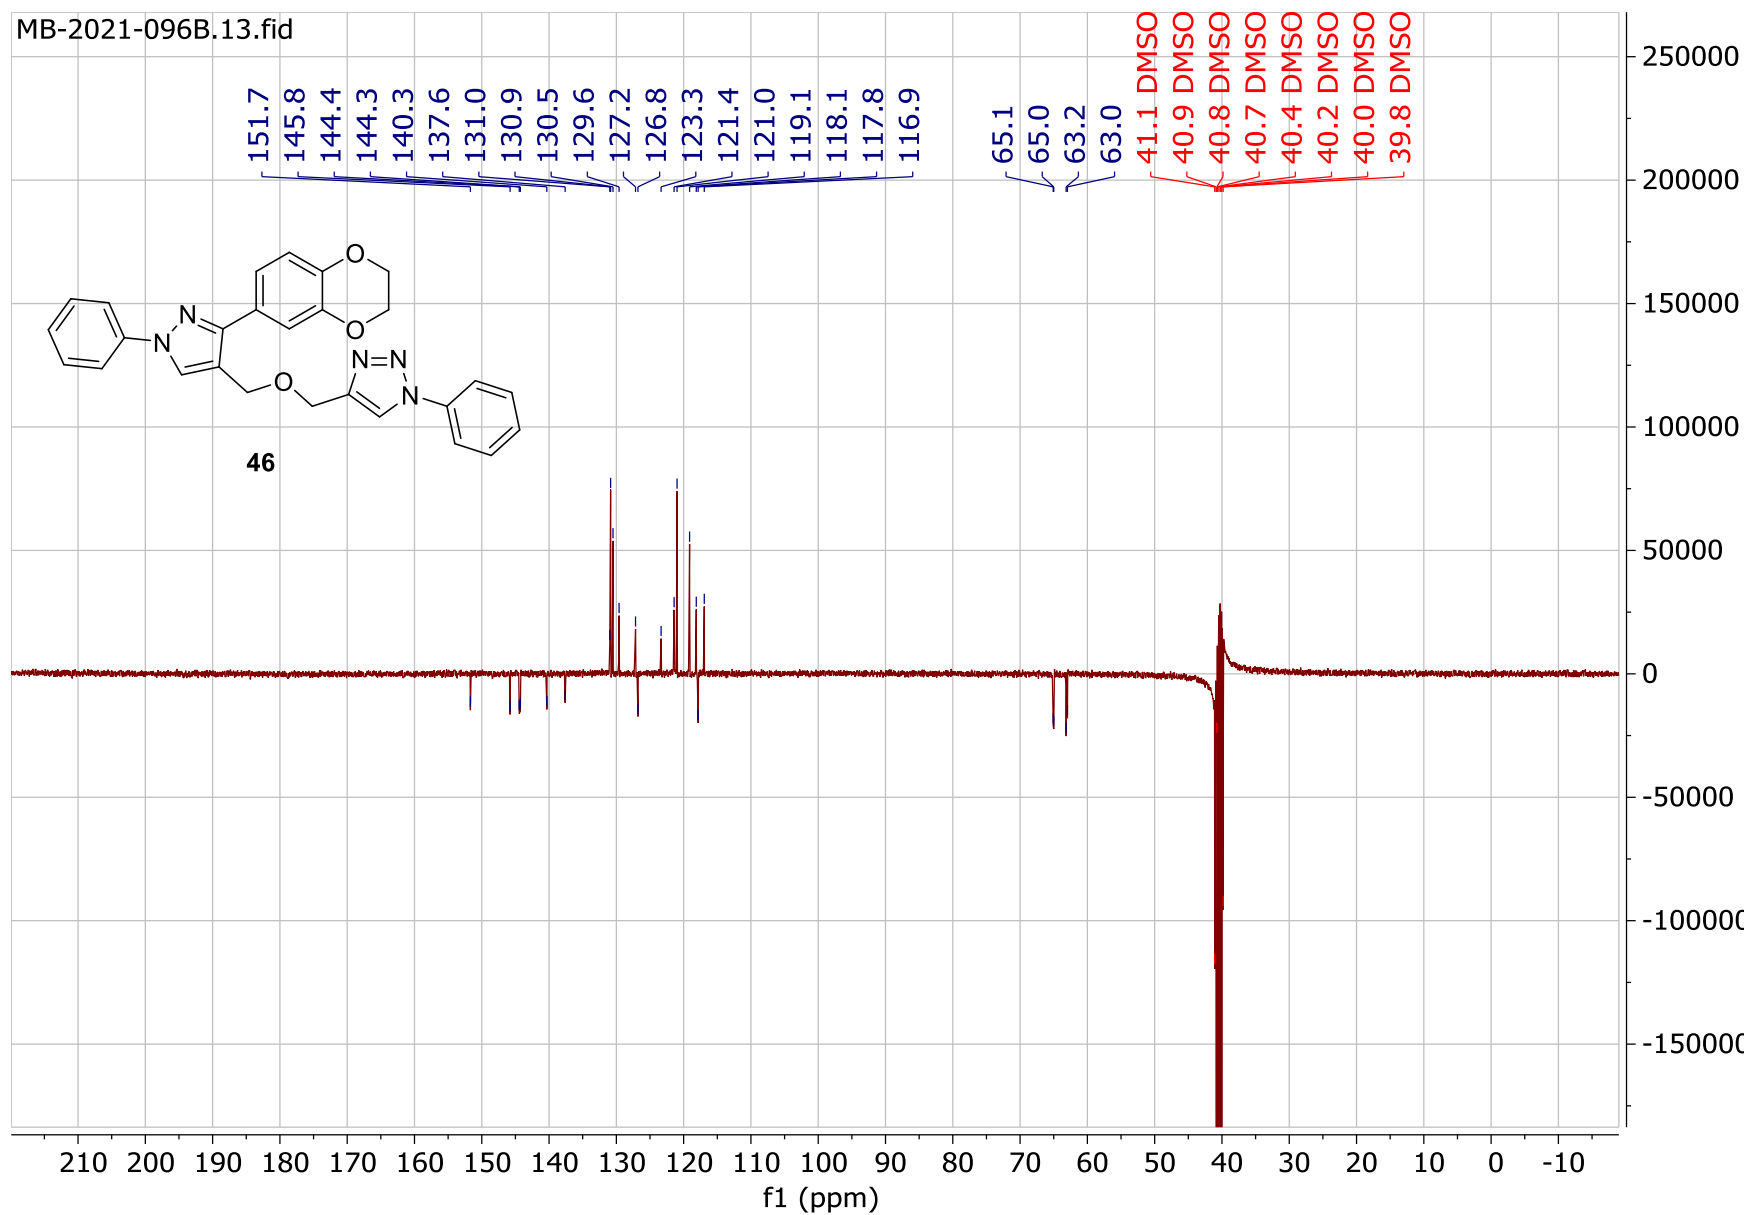

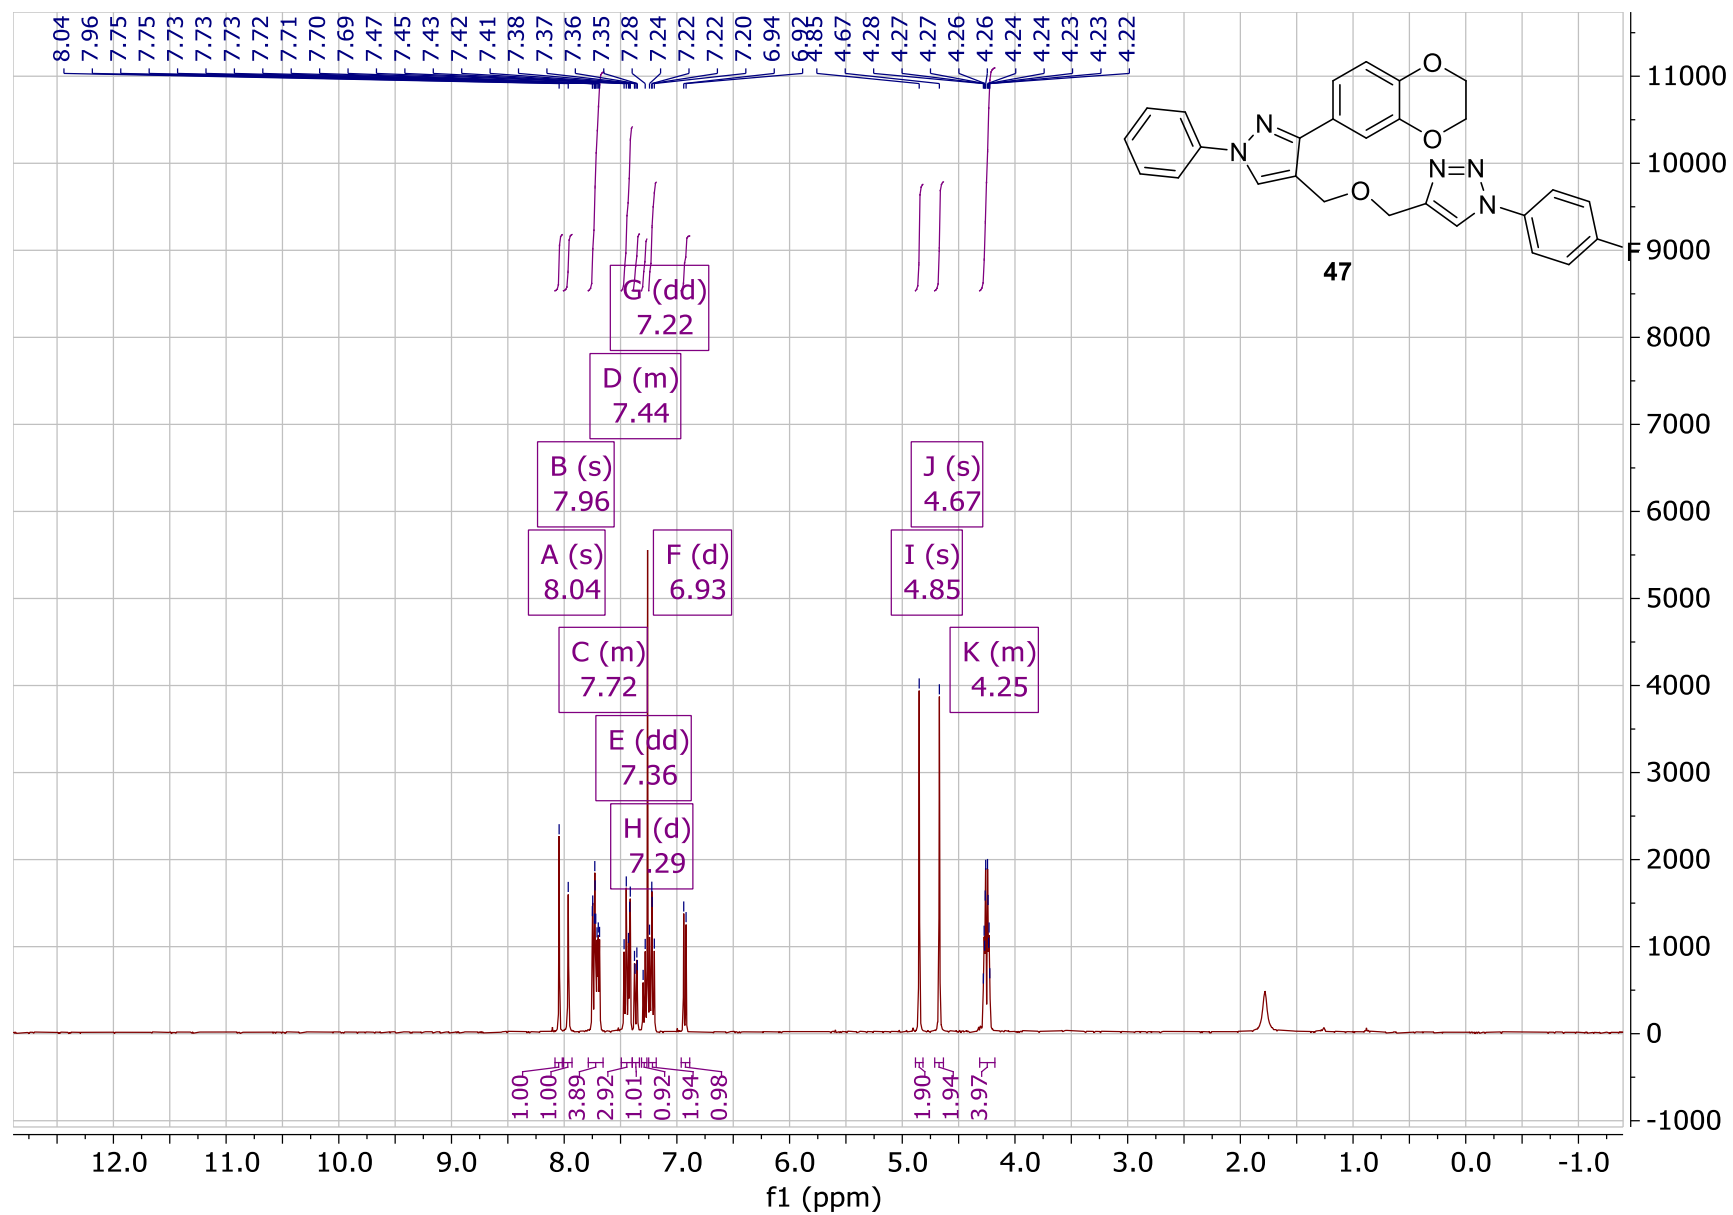

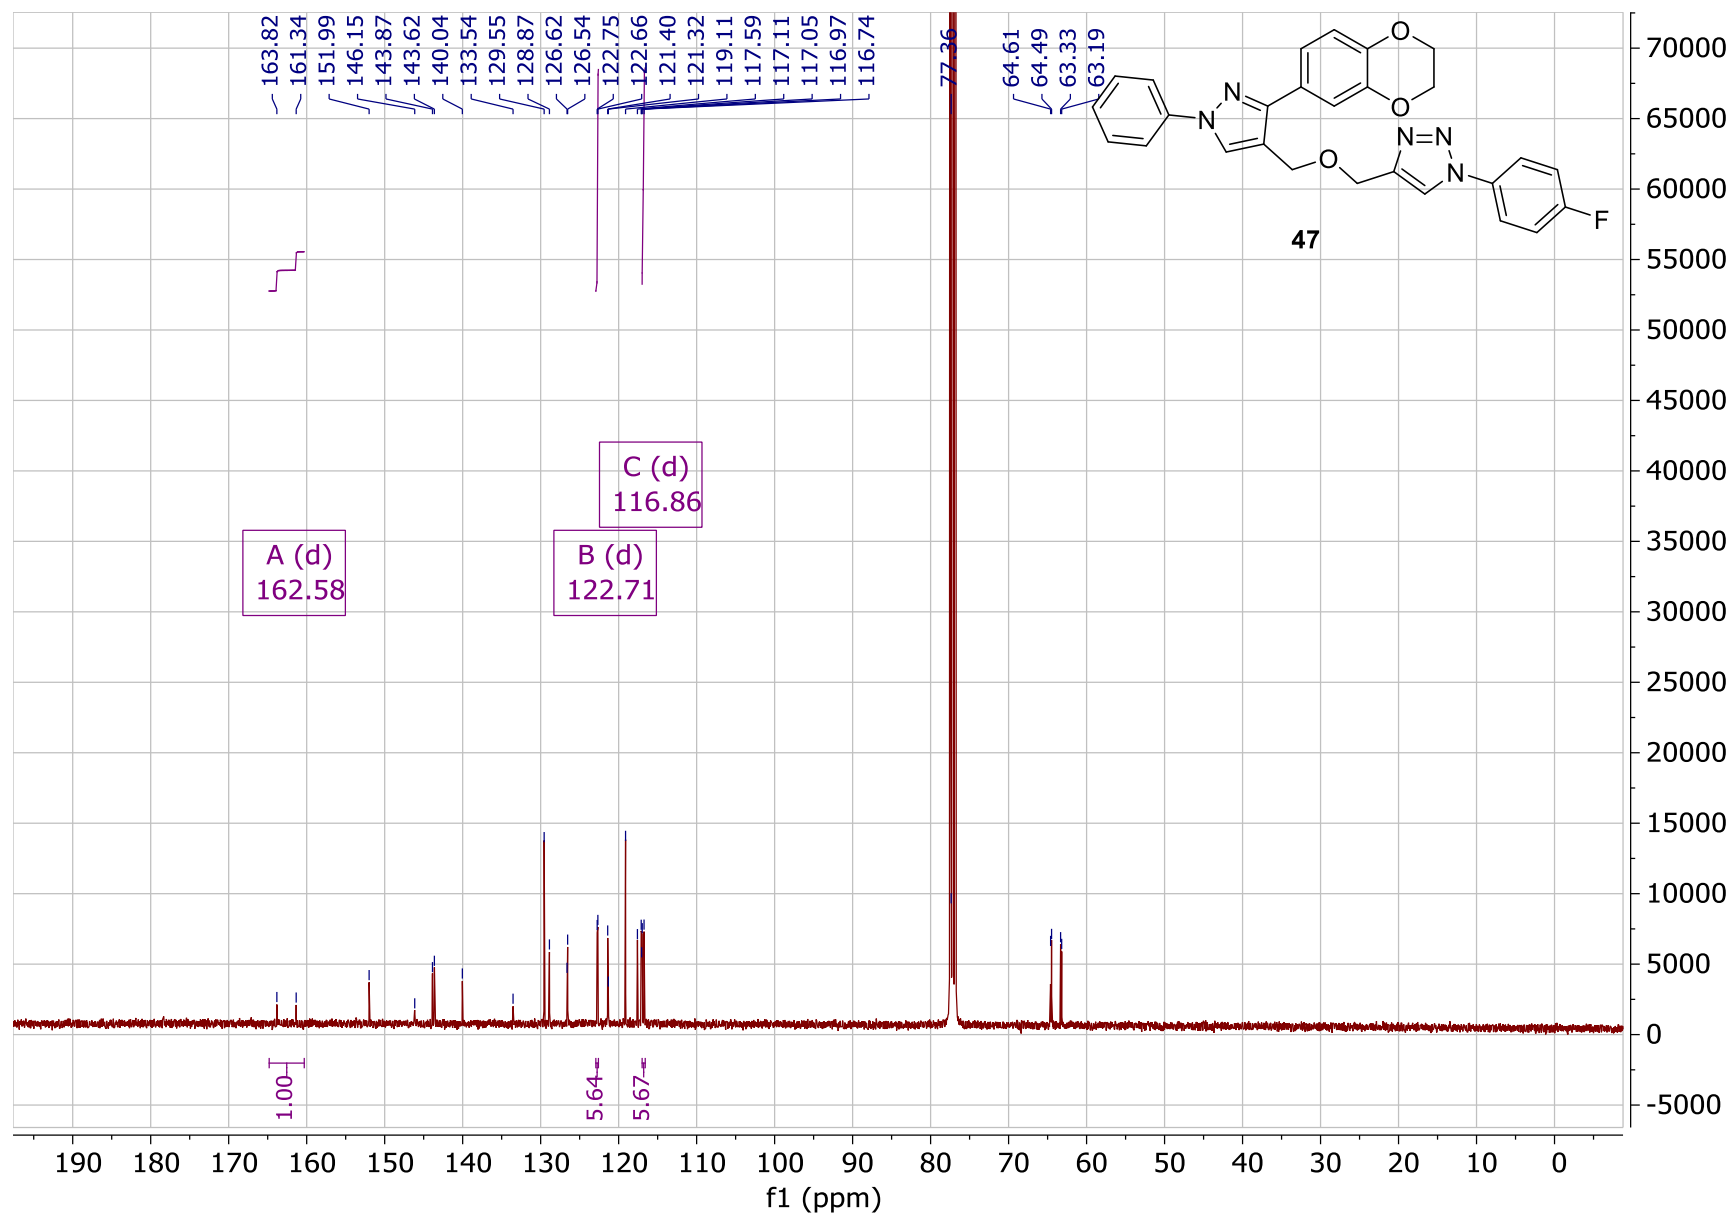

MB-2021-097B.14.fid

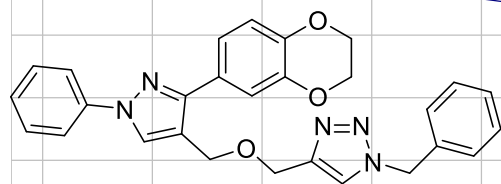

48

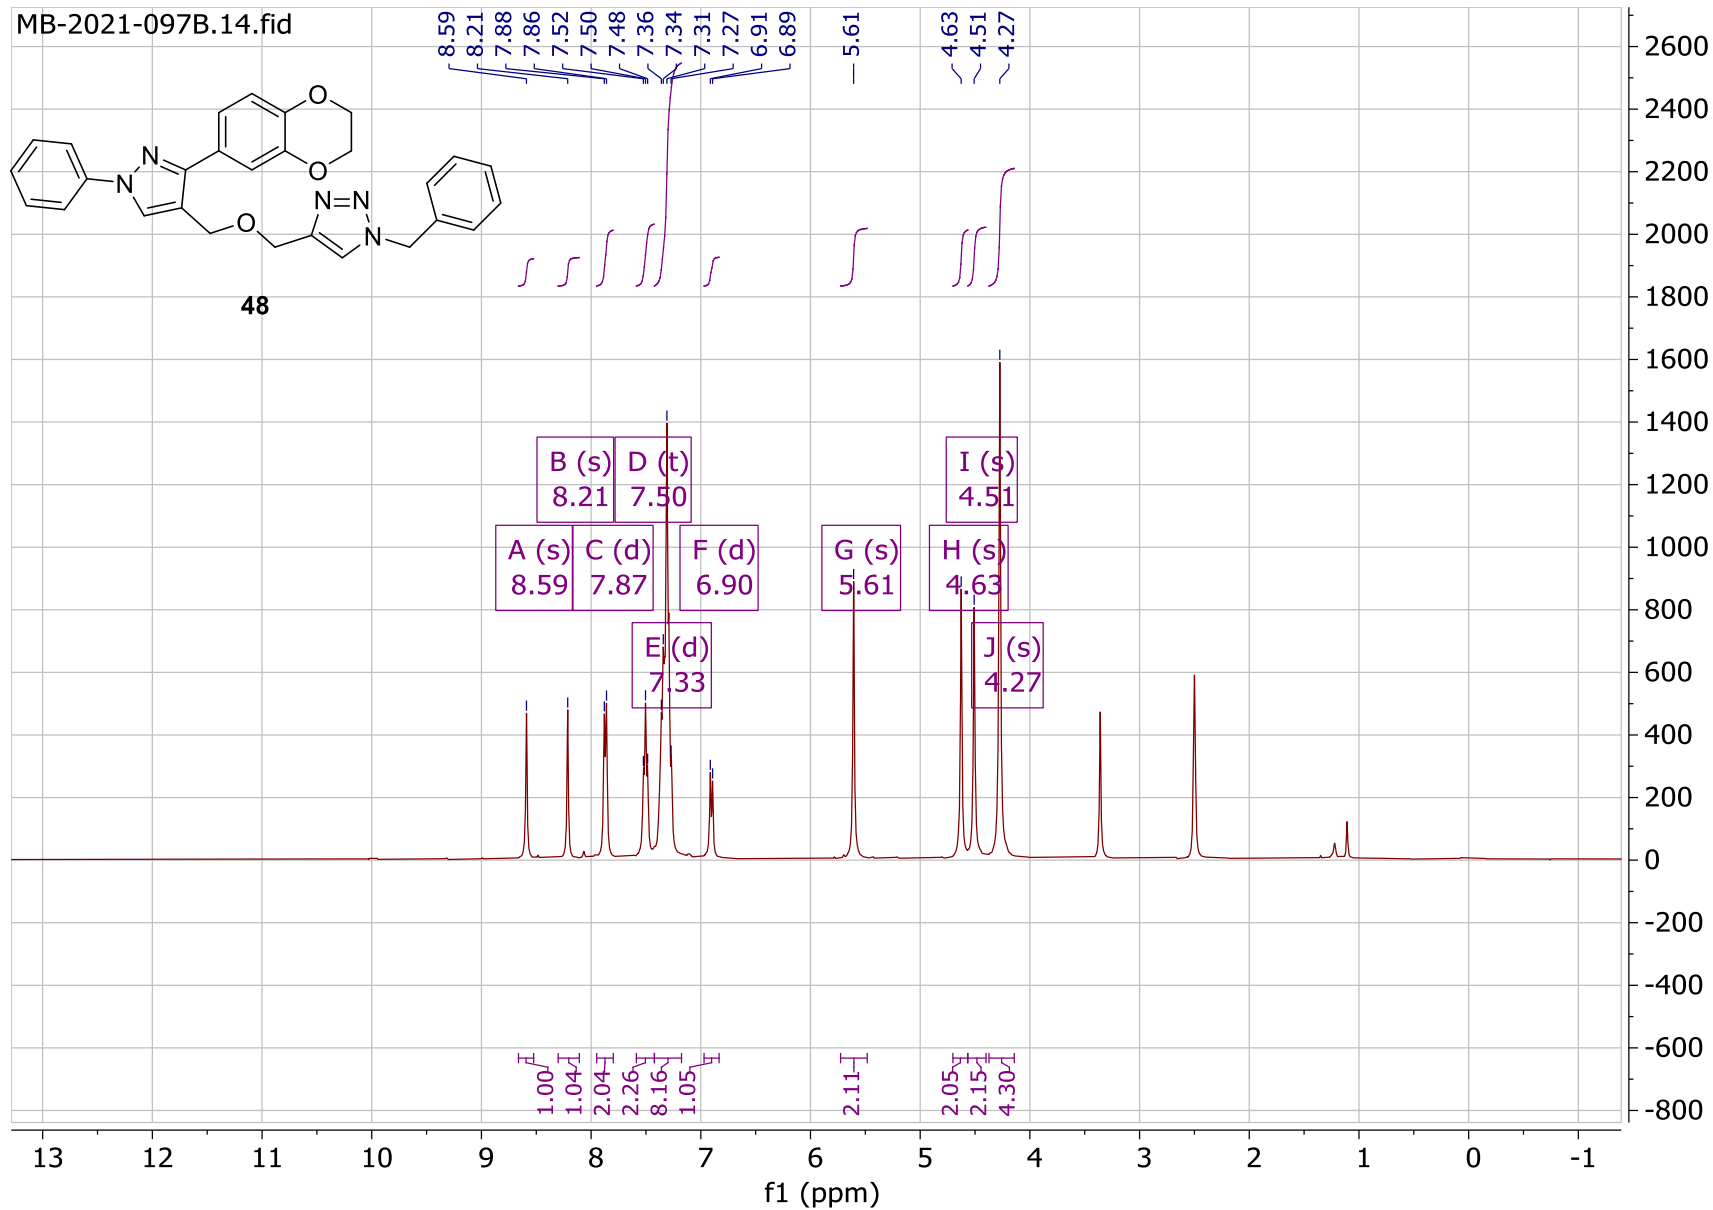

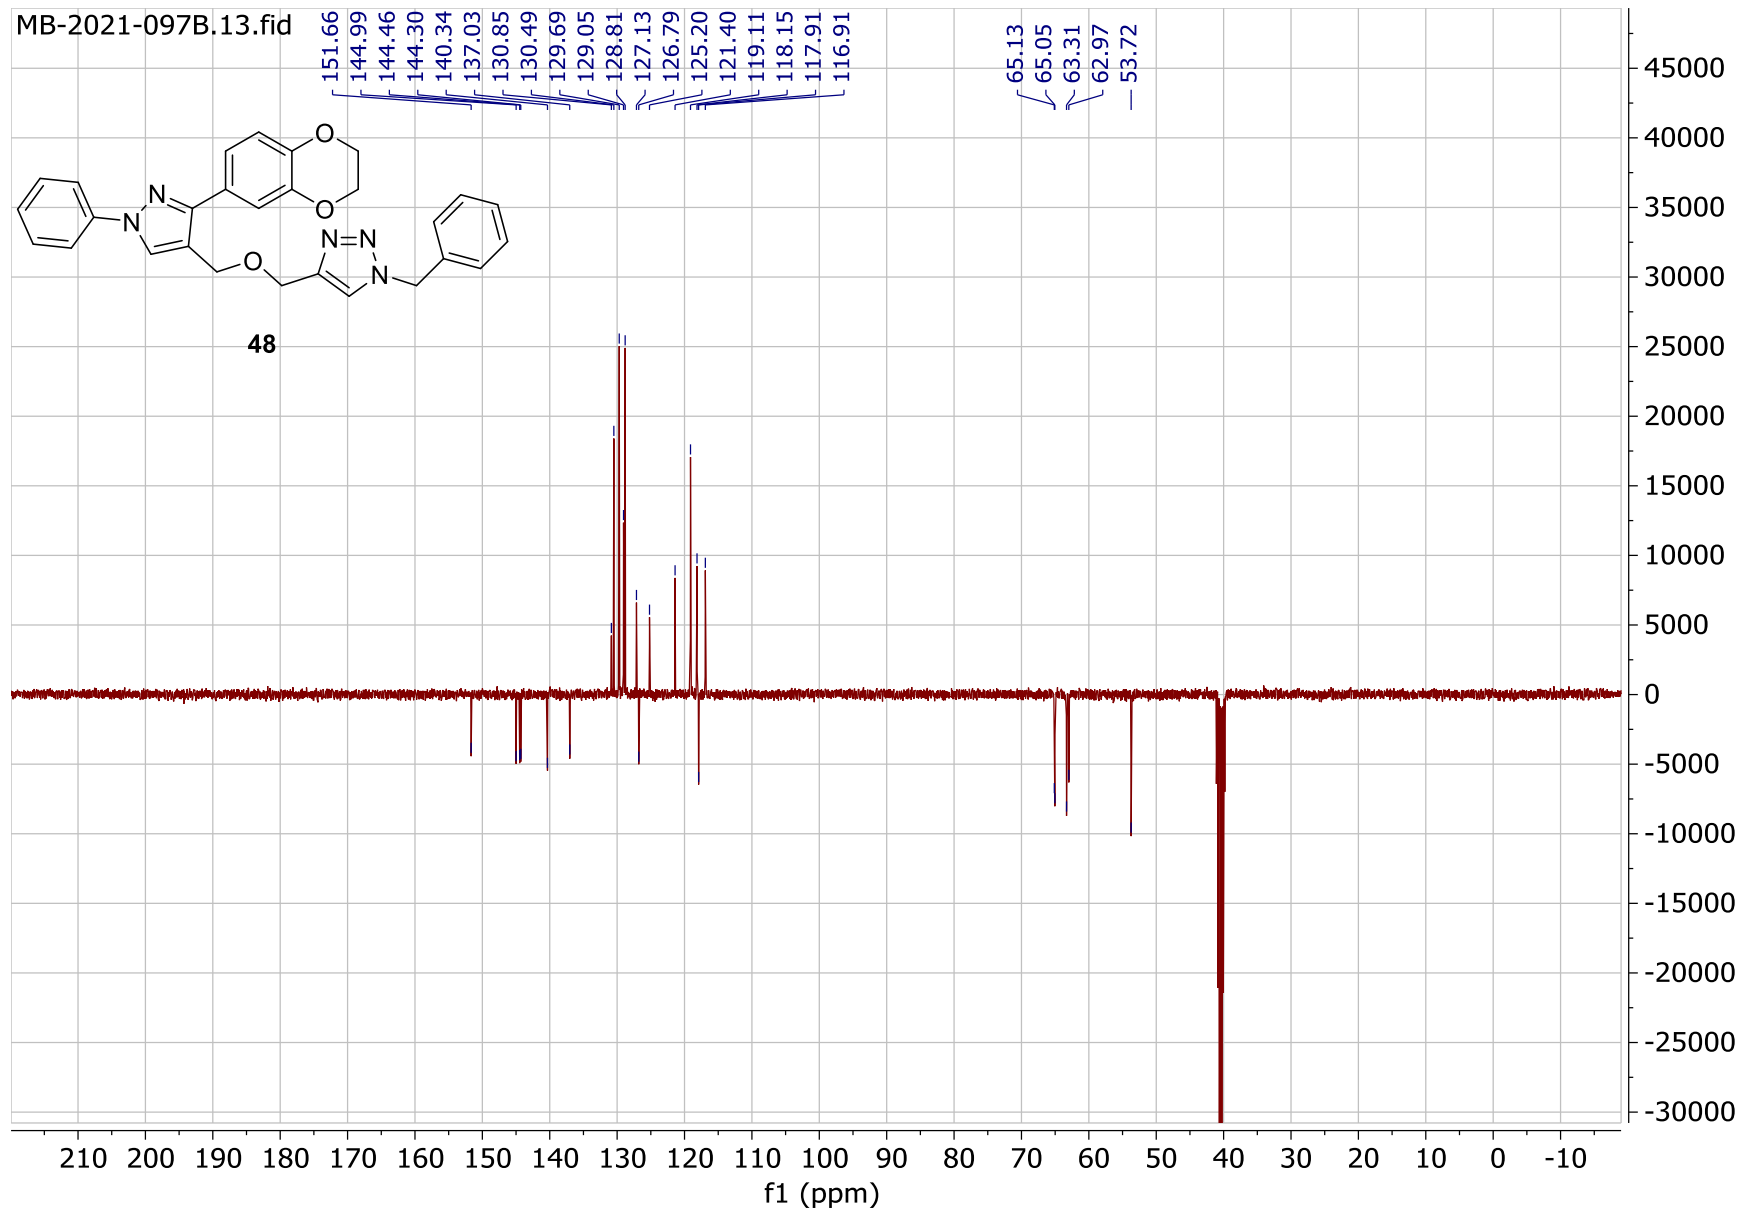

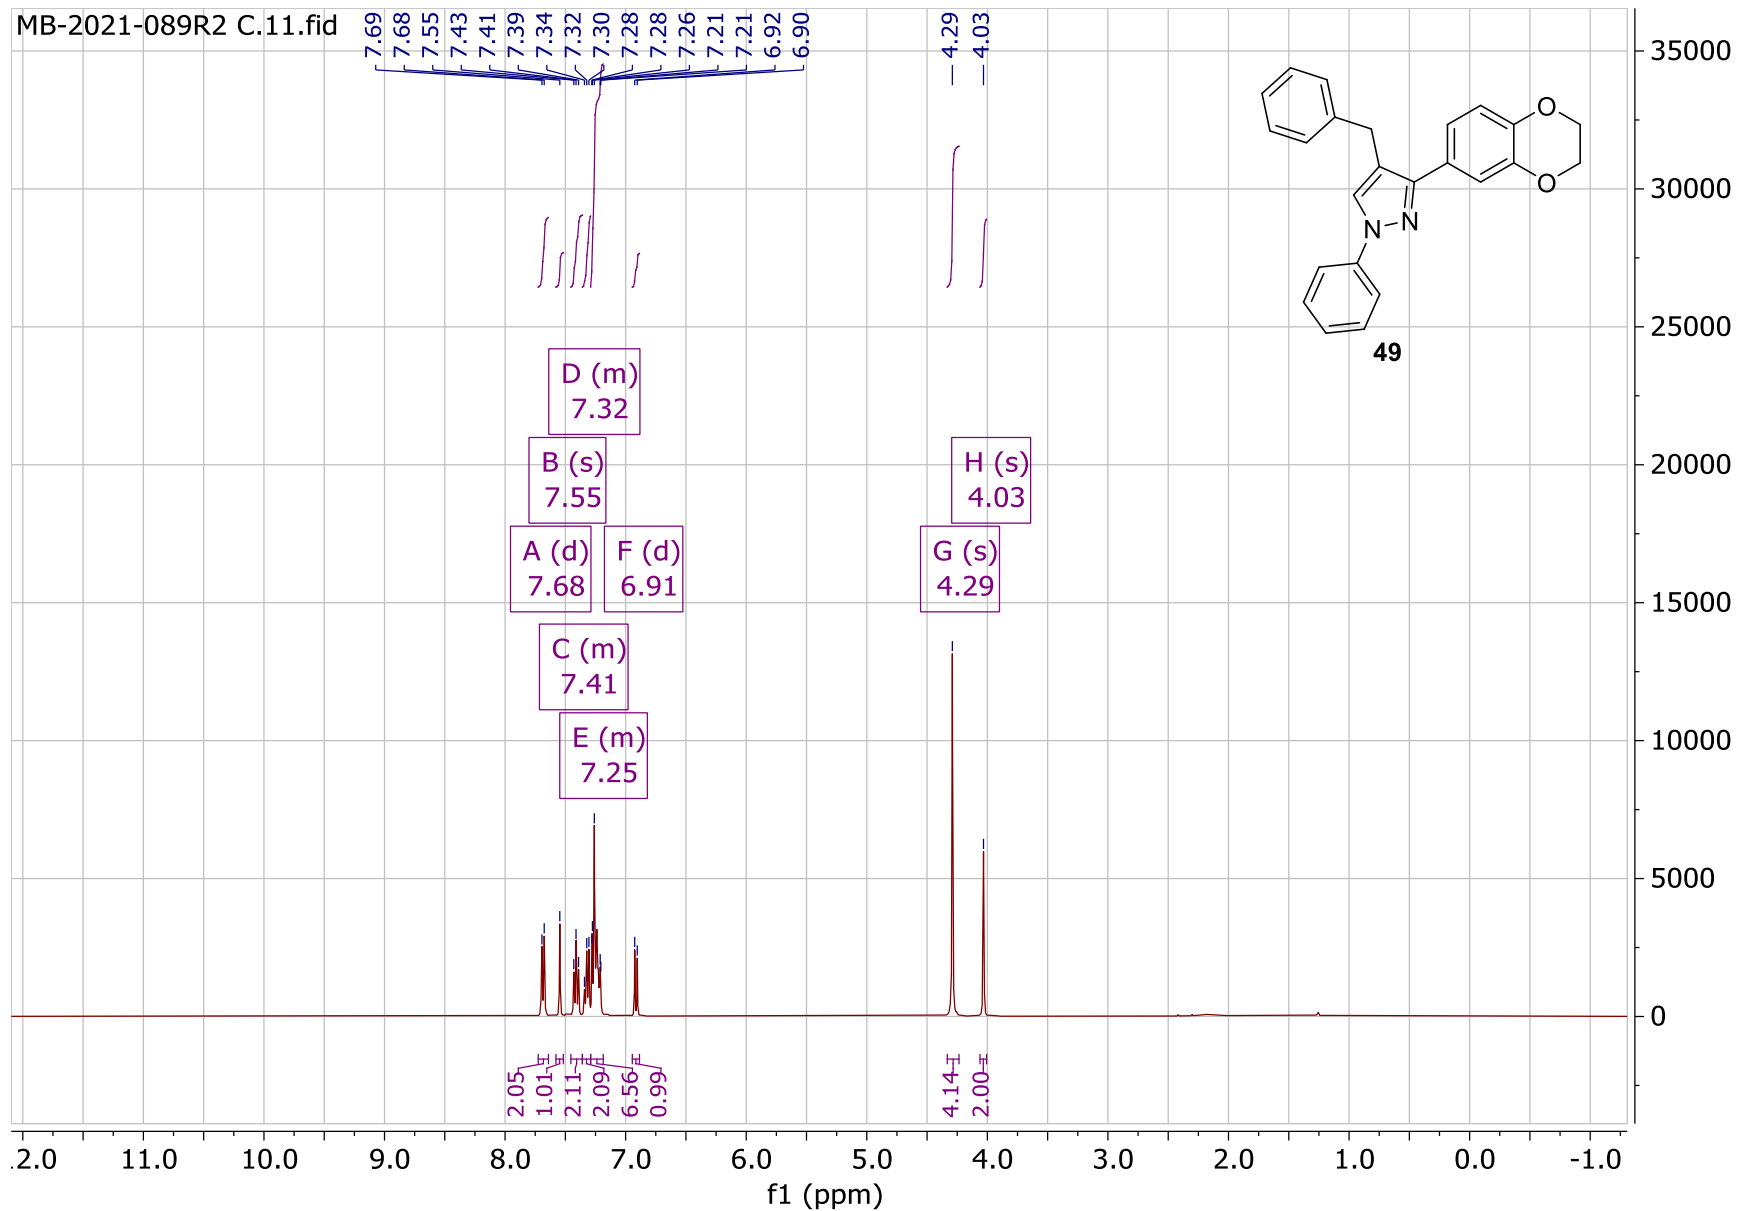

MB-2021-089R2 C.13.fid

151.17  
143.61  
140.62  
140.17  
129.41  
128.78  
128.71  
127.42  
127.12  
126.38  
126.06  
121.32  
120.42  
118.72  
117.42  
116.97  
64.61  
64.48

31.16

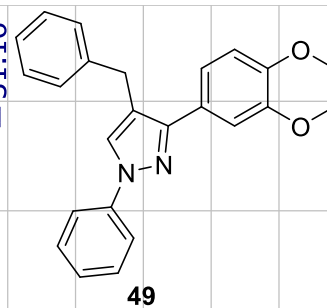

49

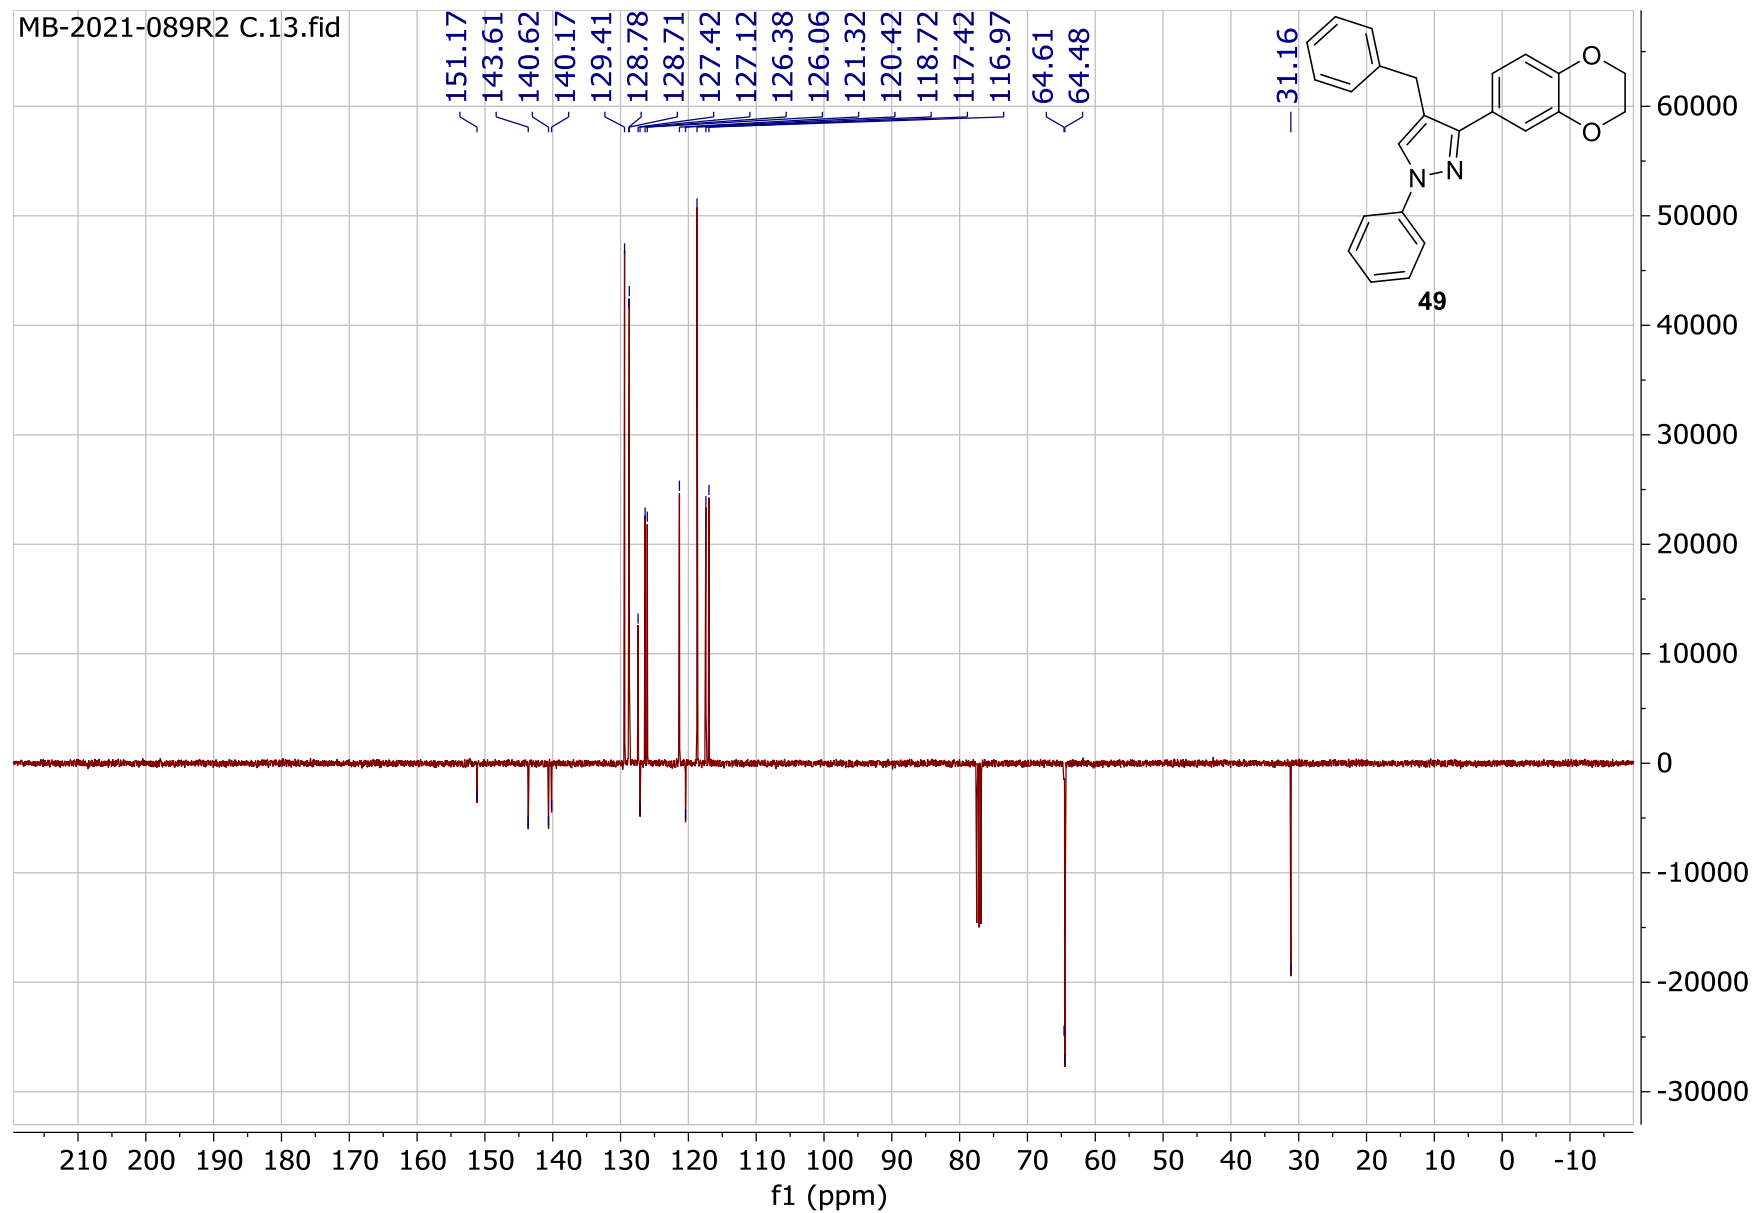

MB-2021-100B.13.fid

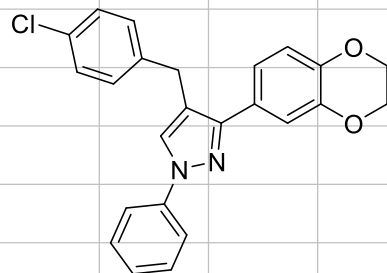

50

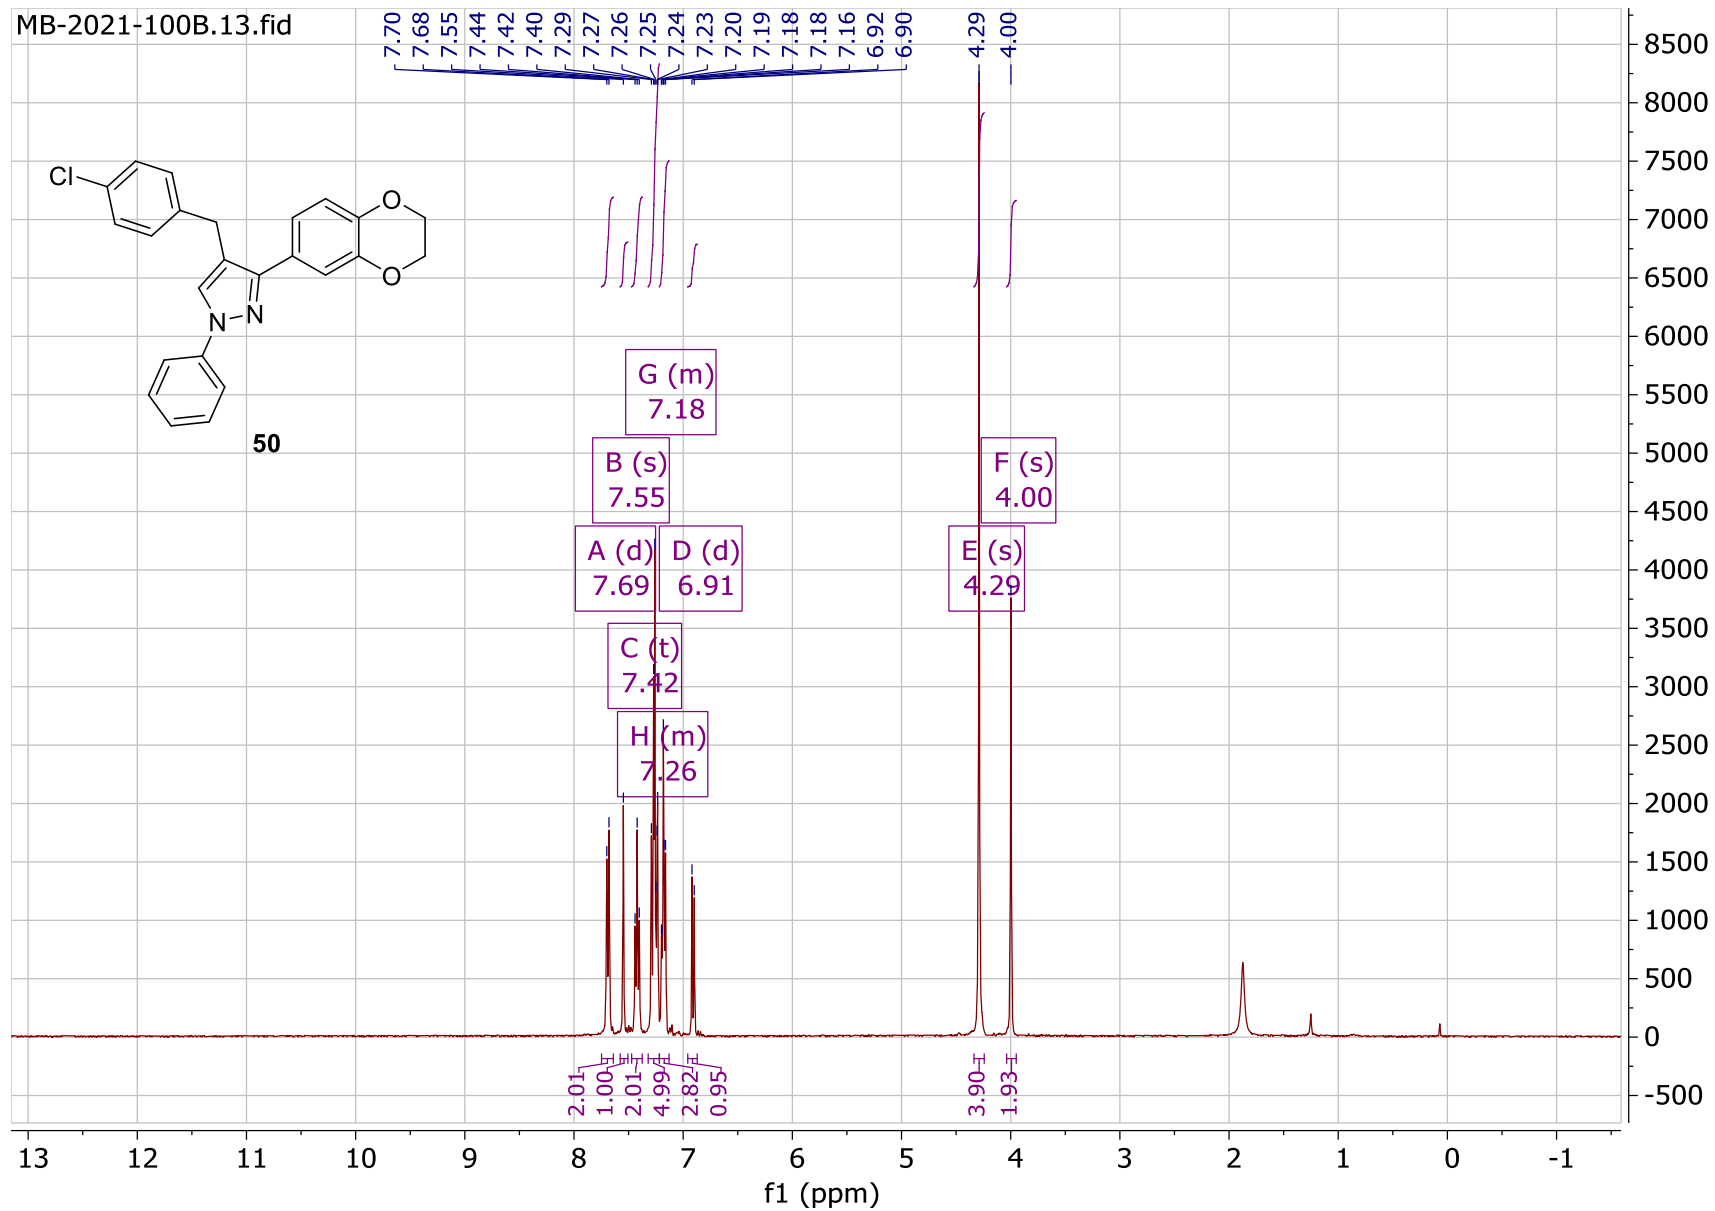



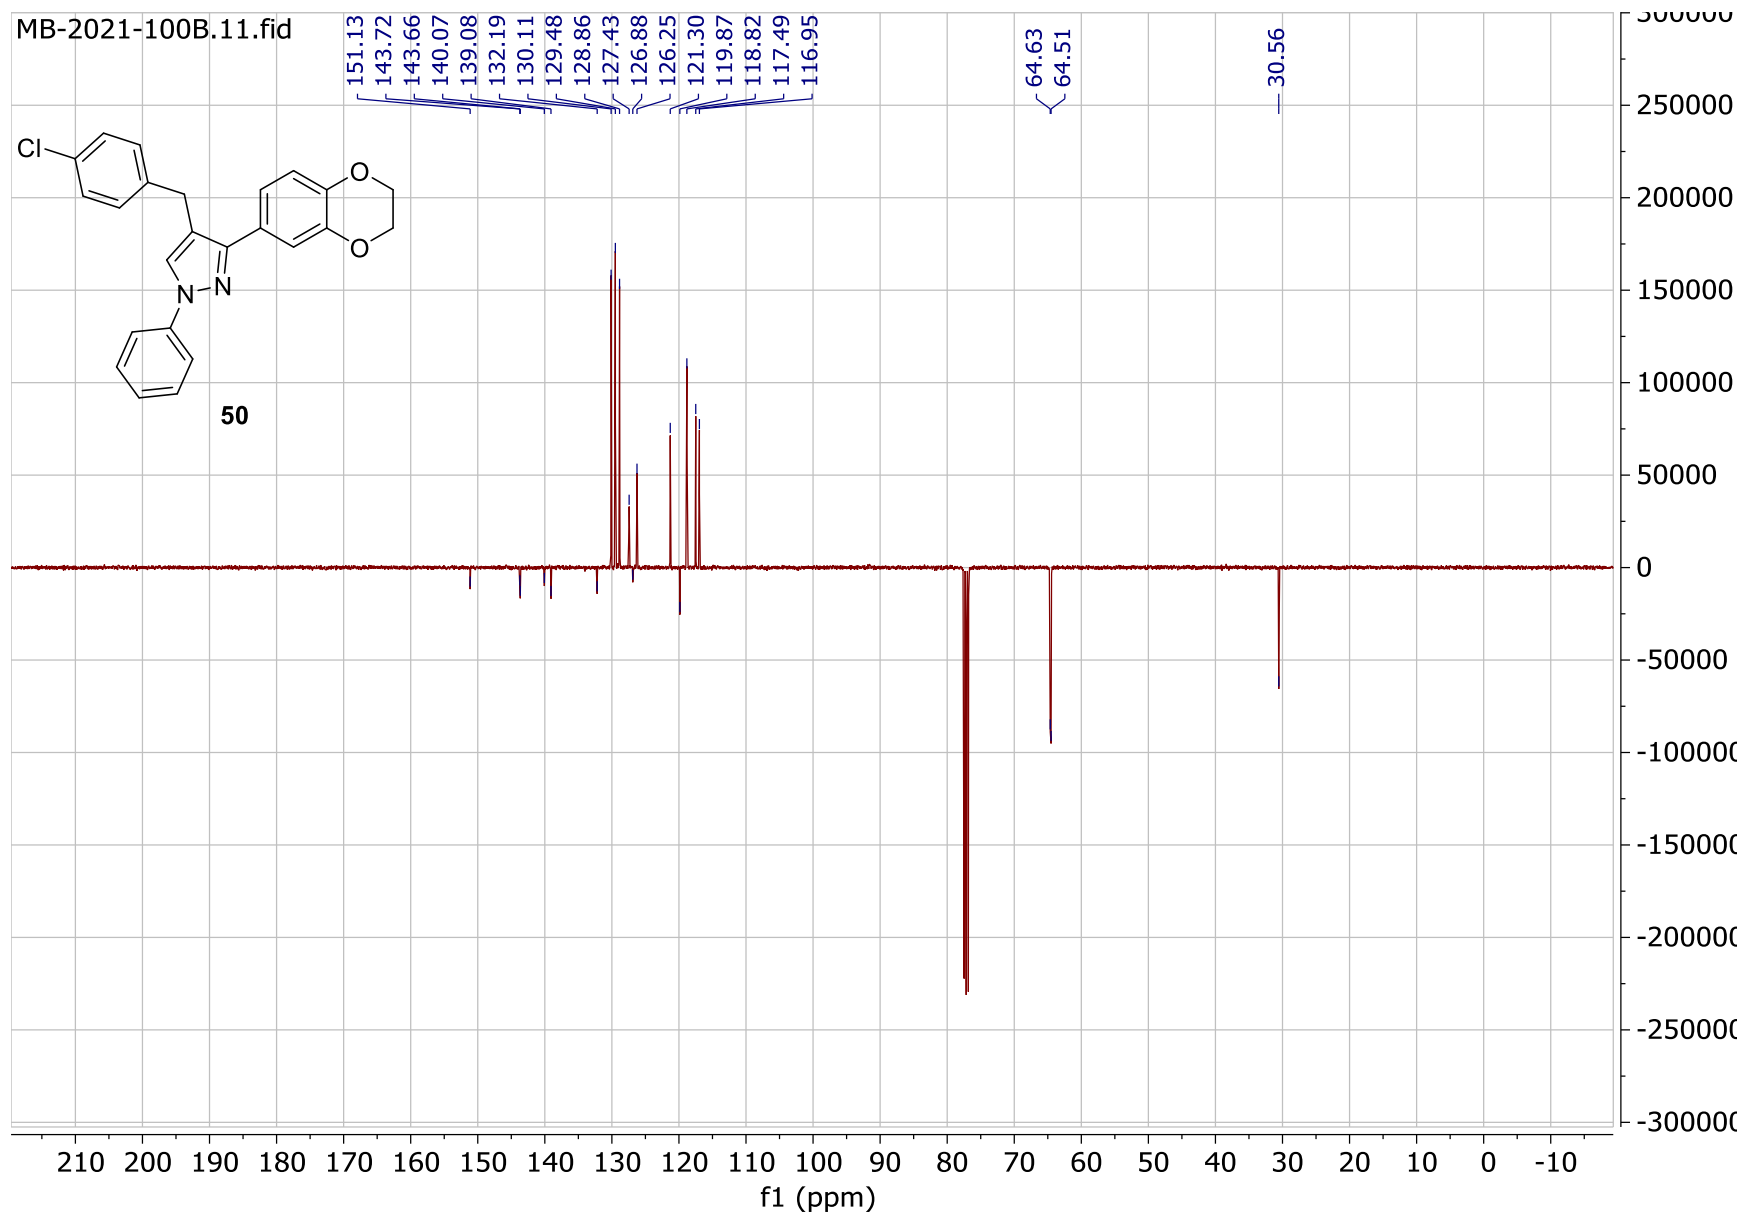

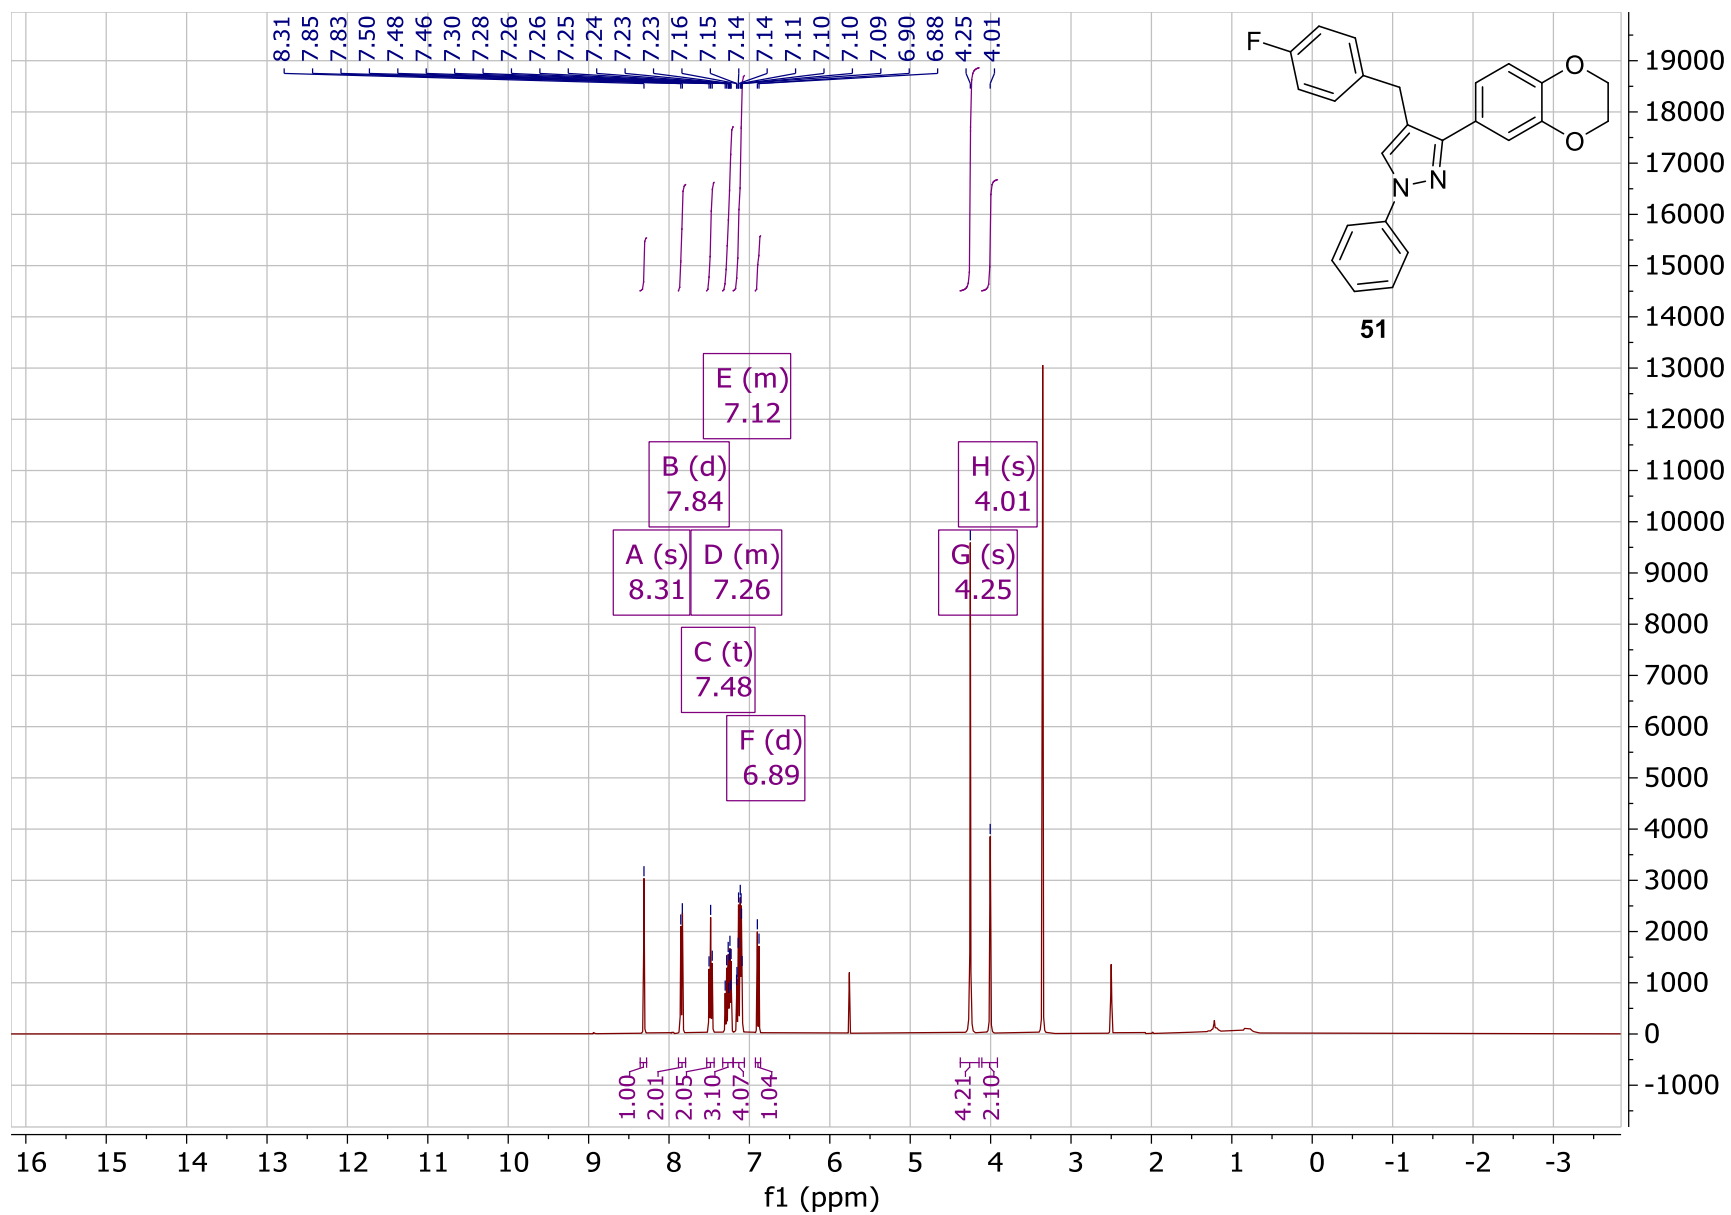

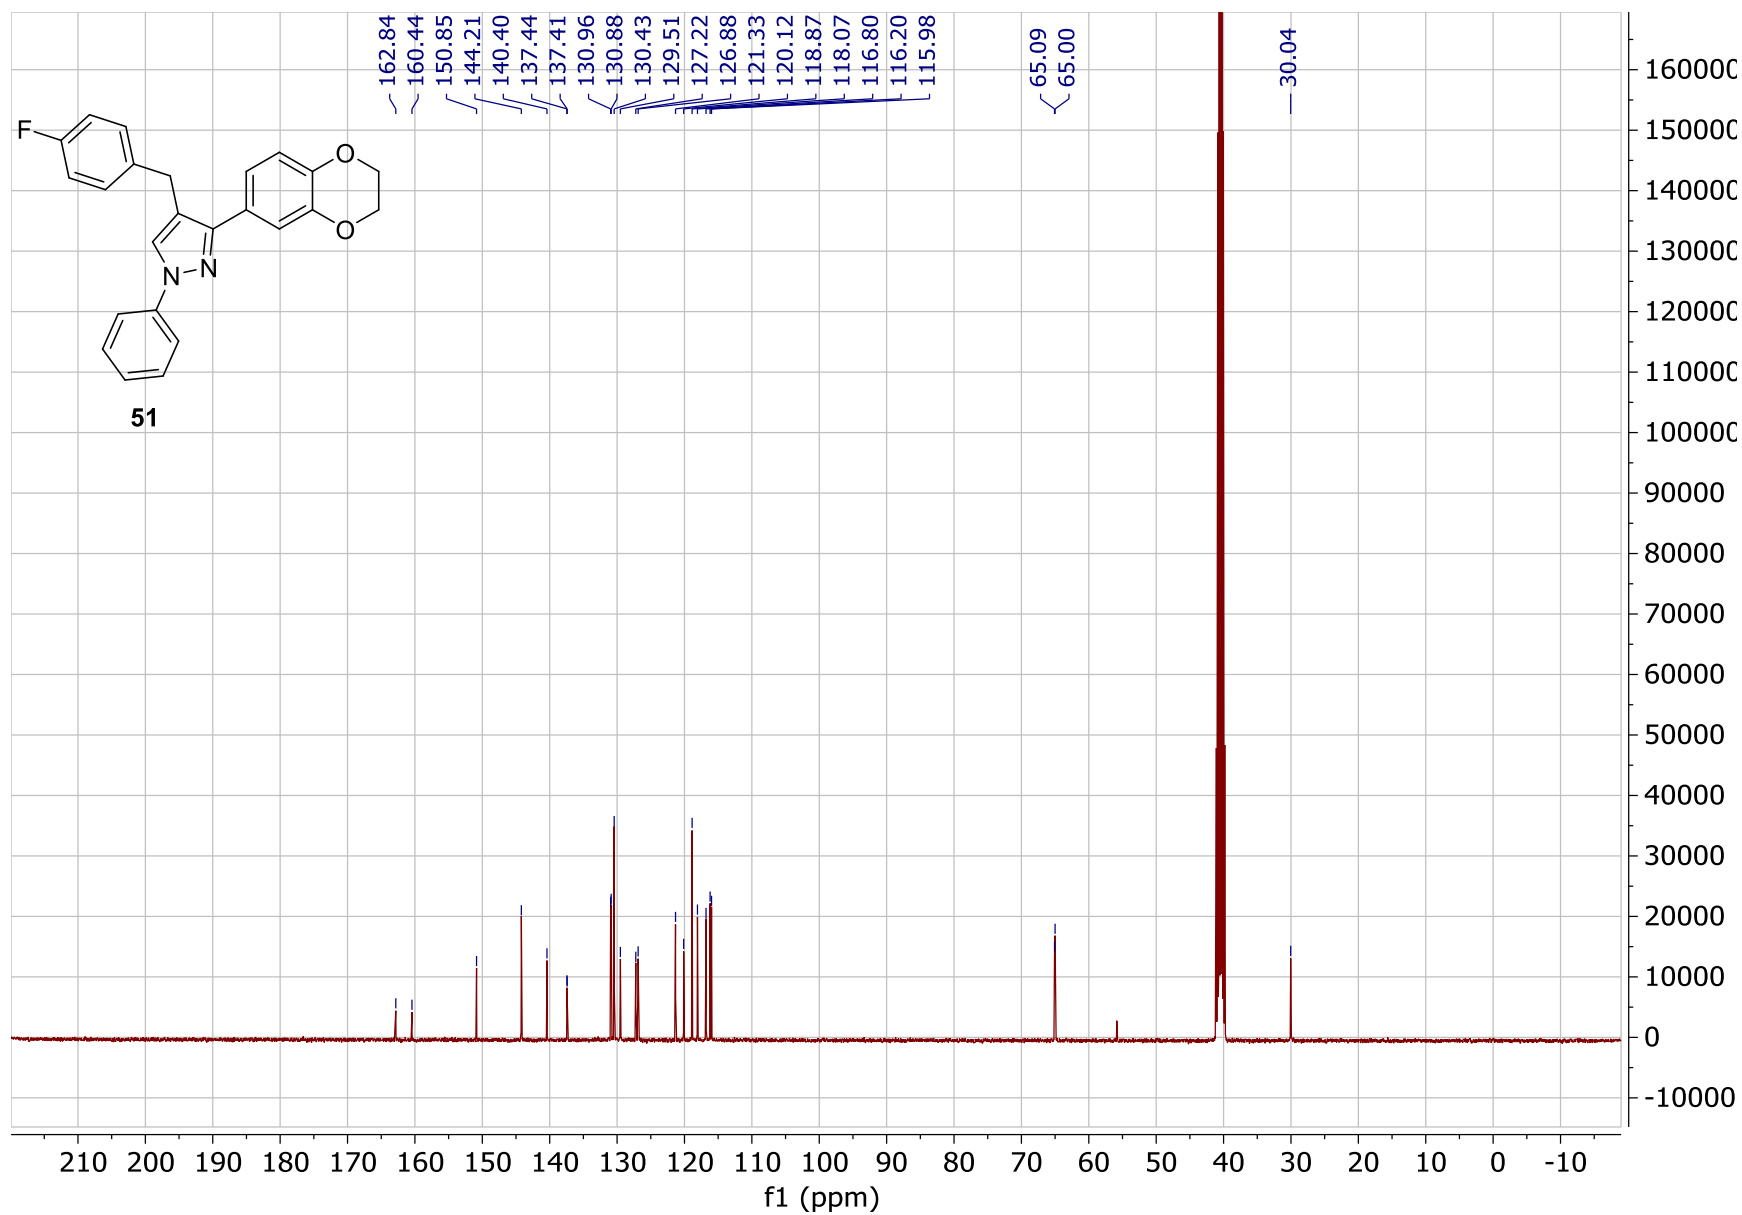

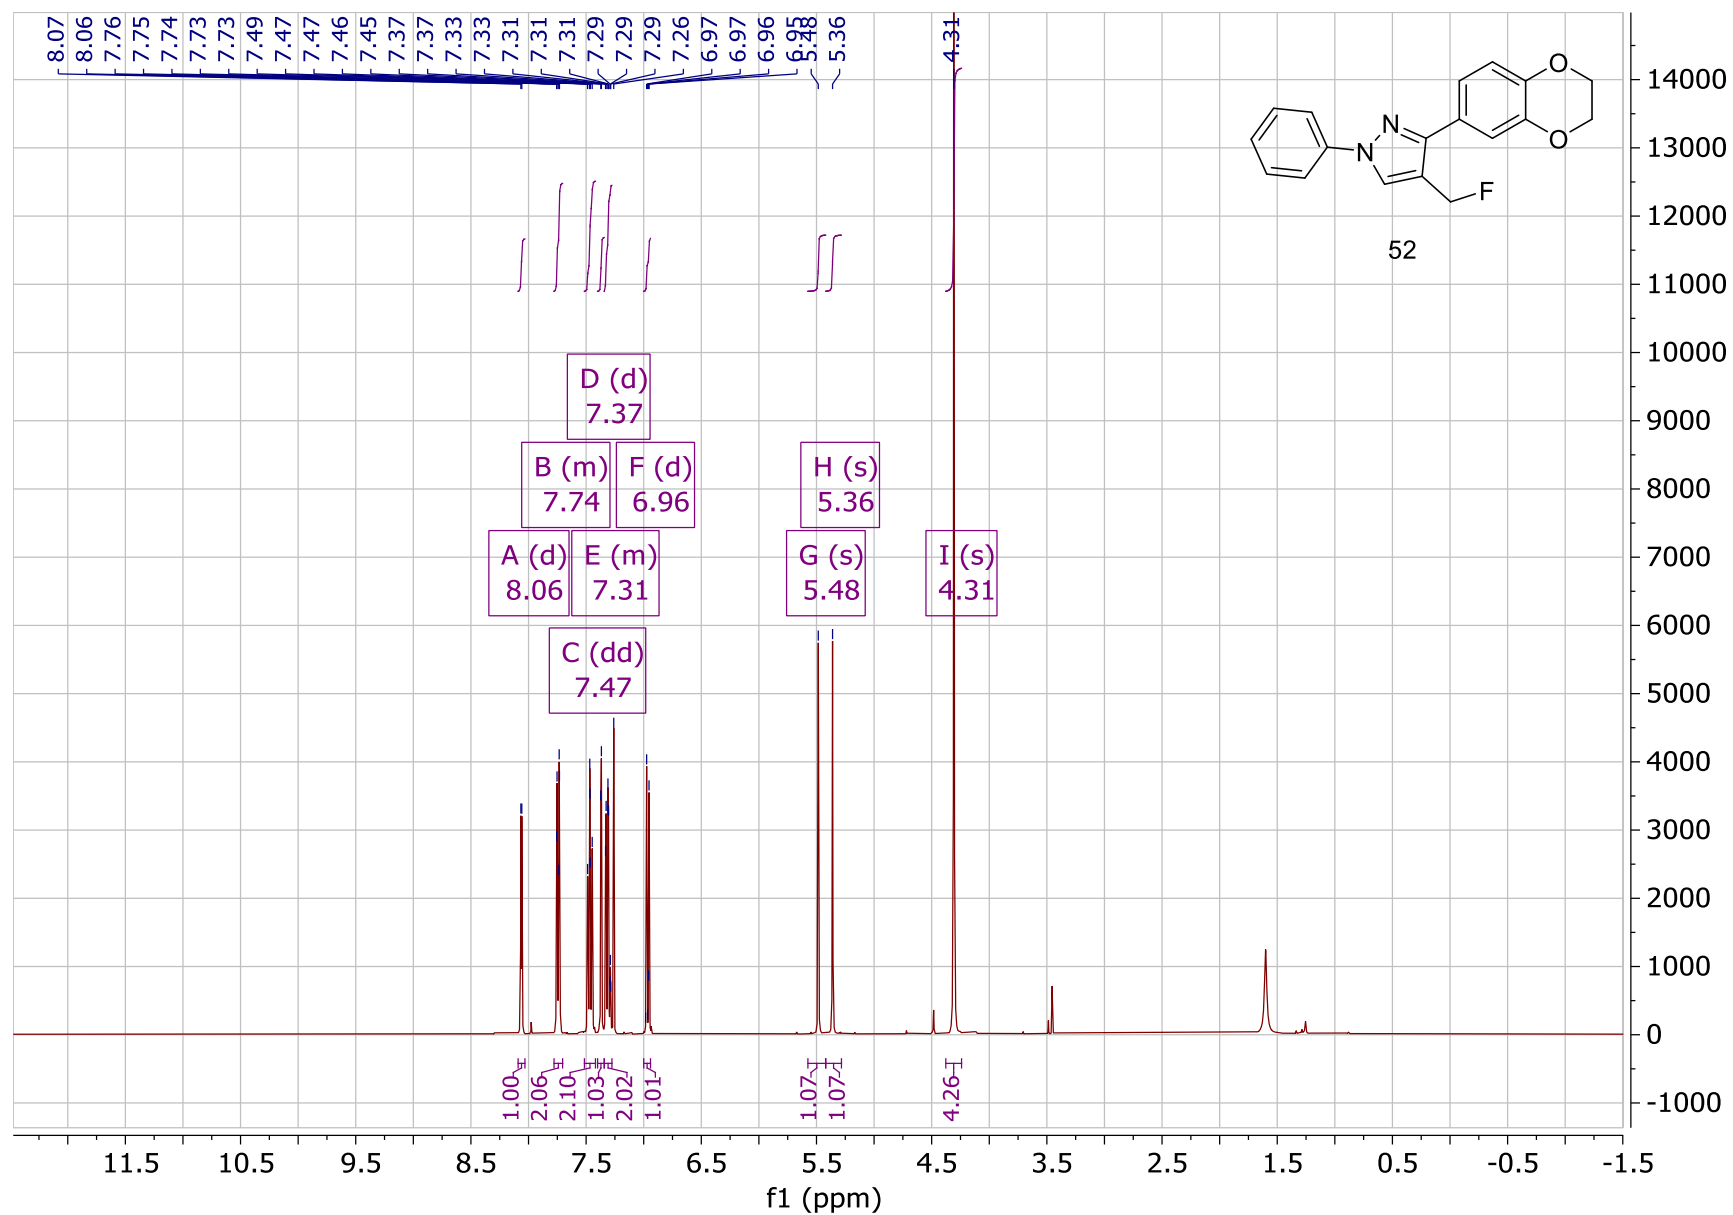

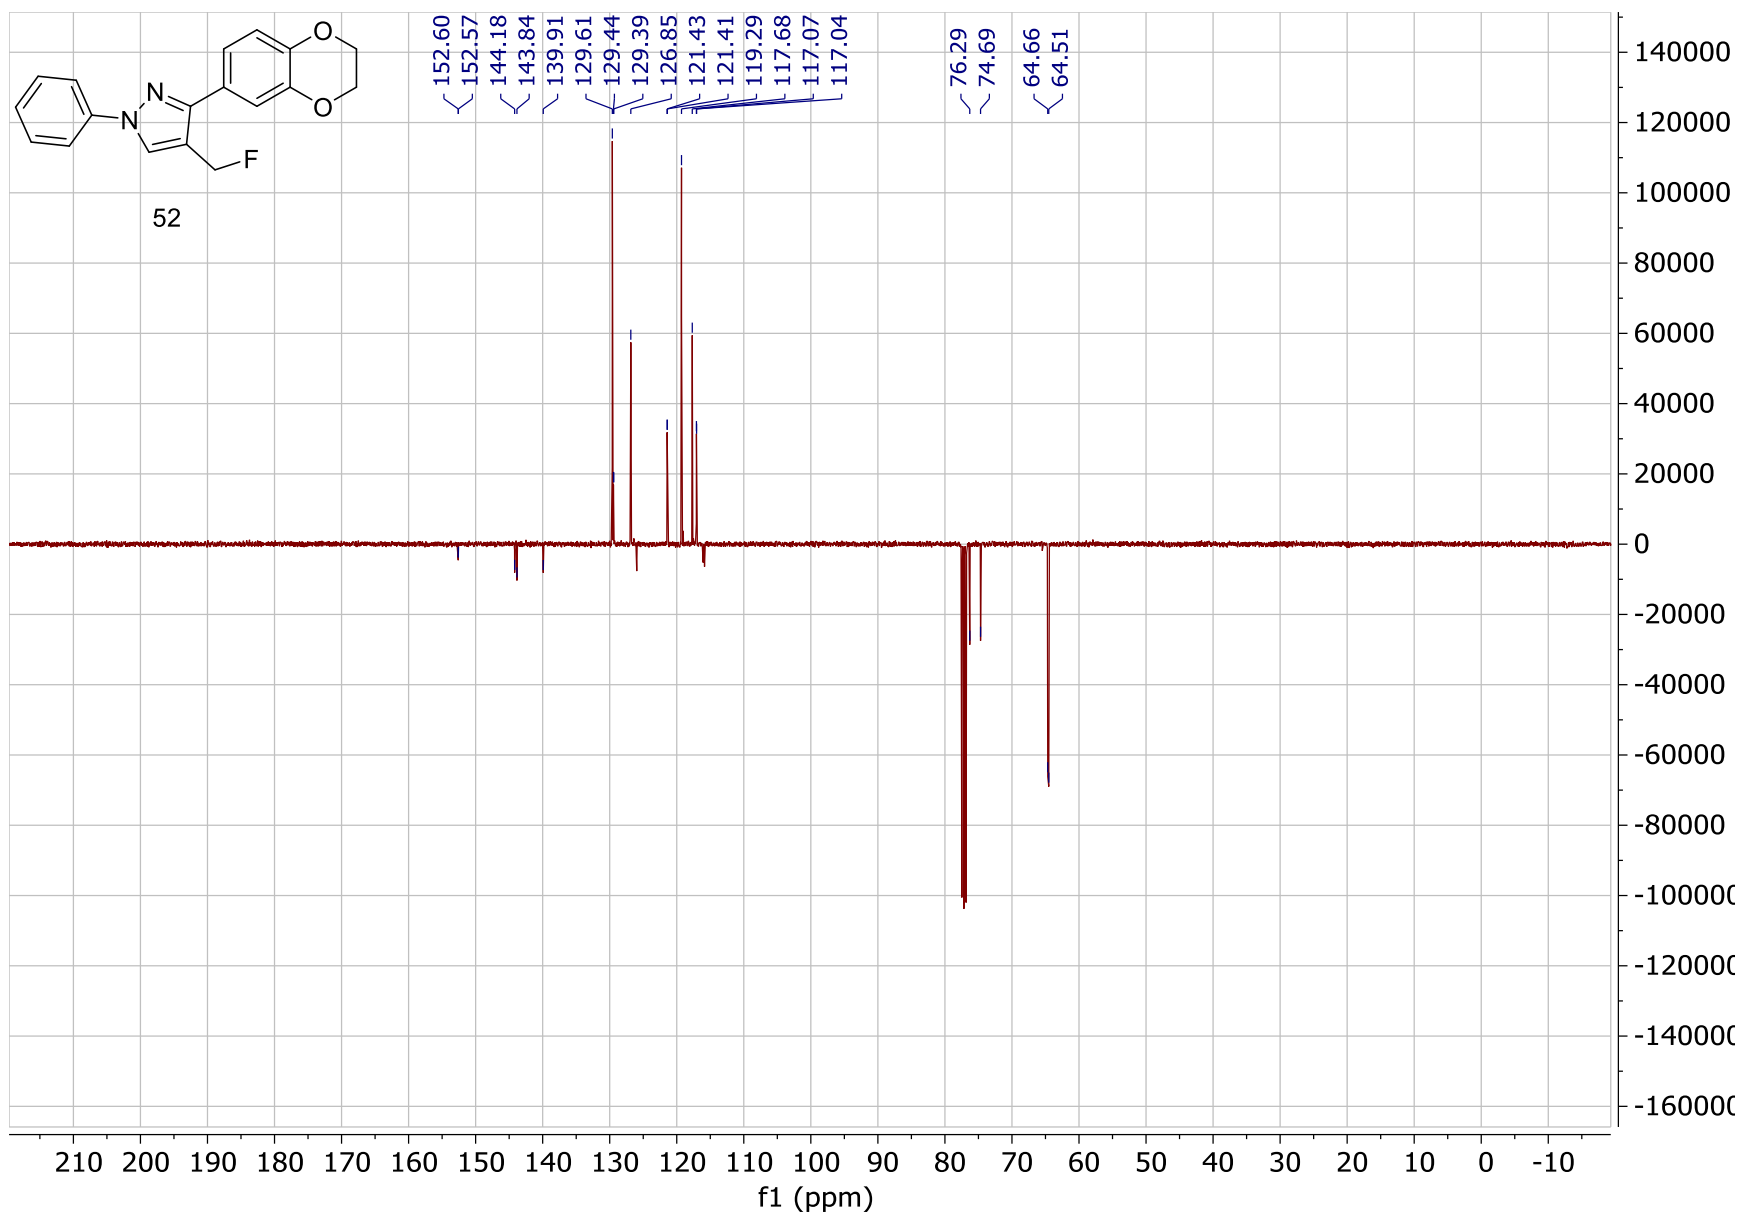

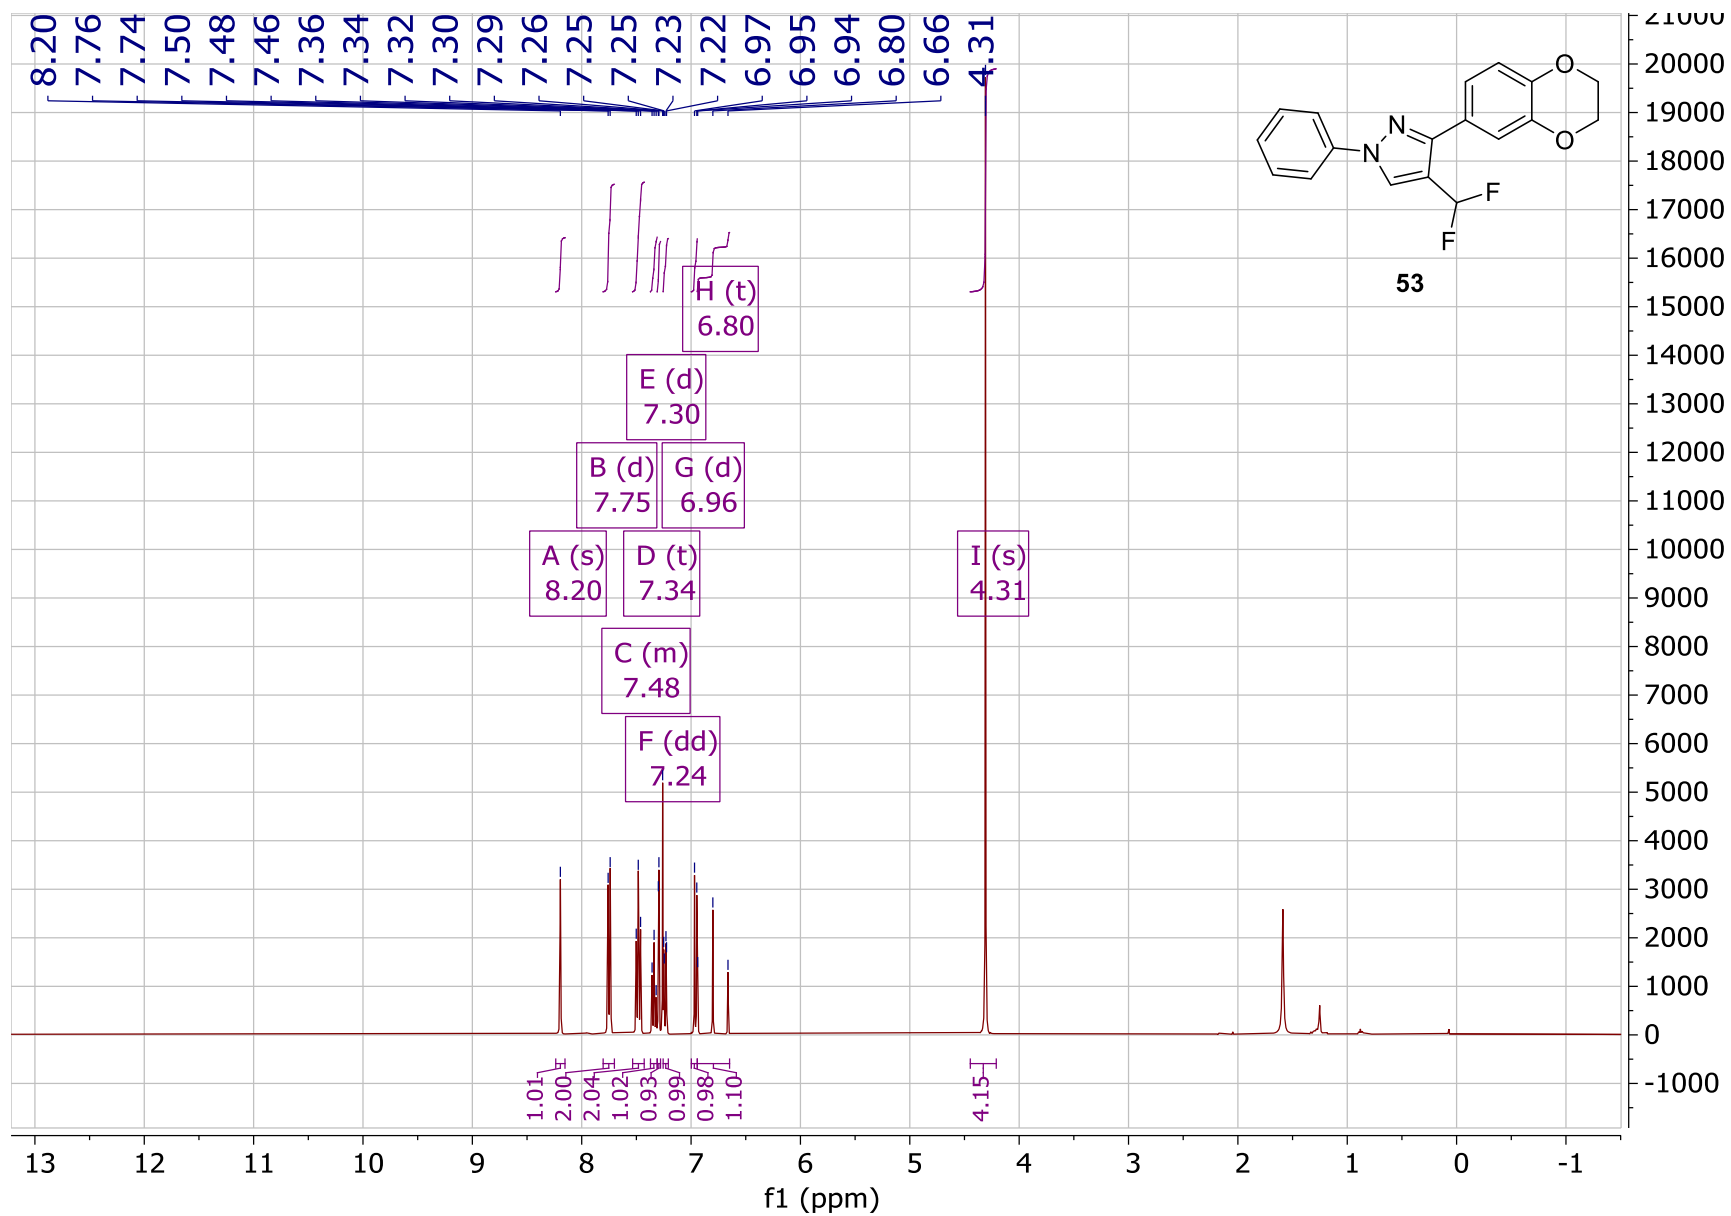

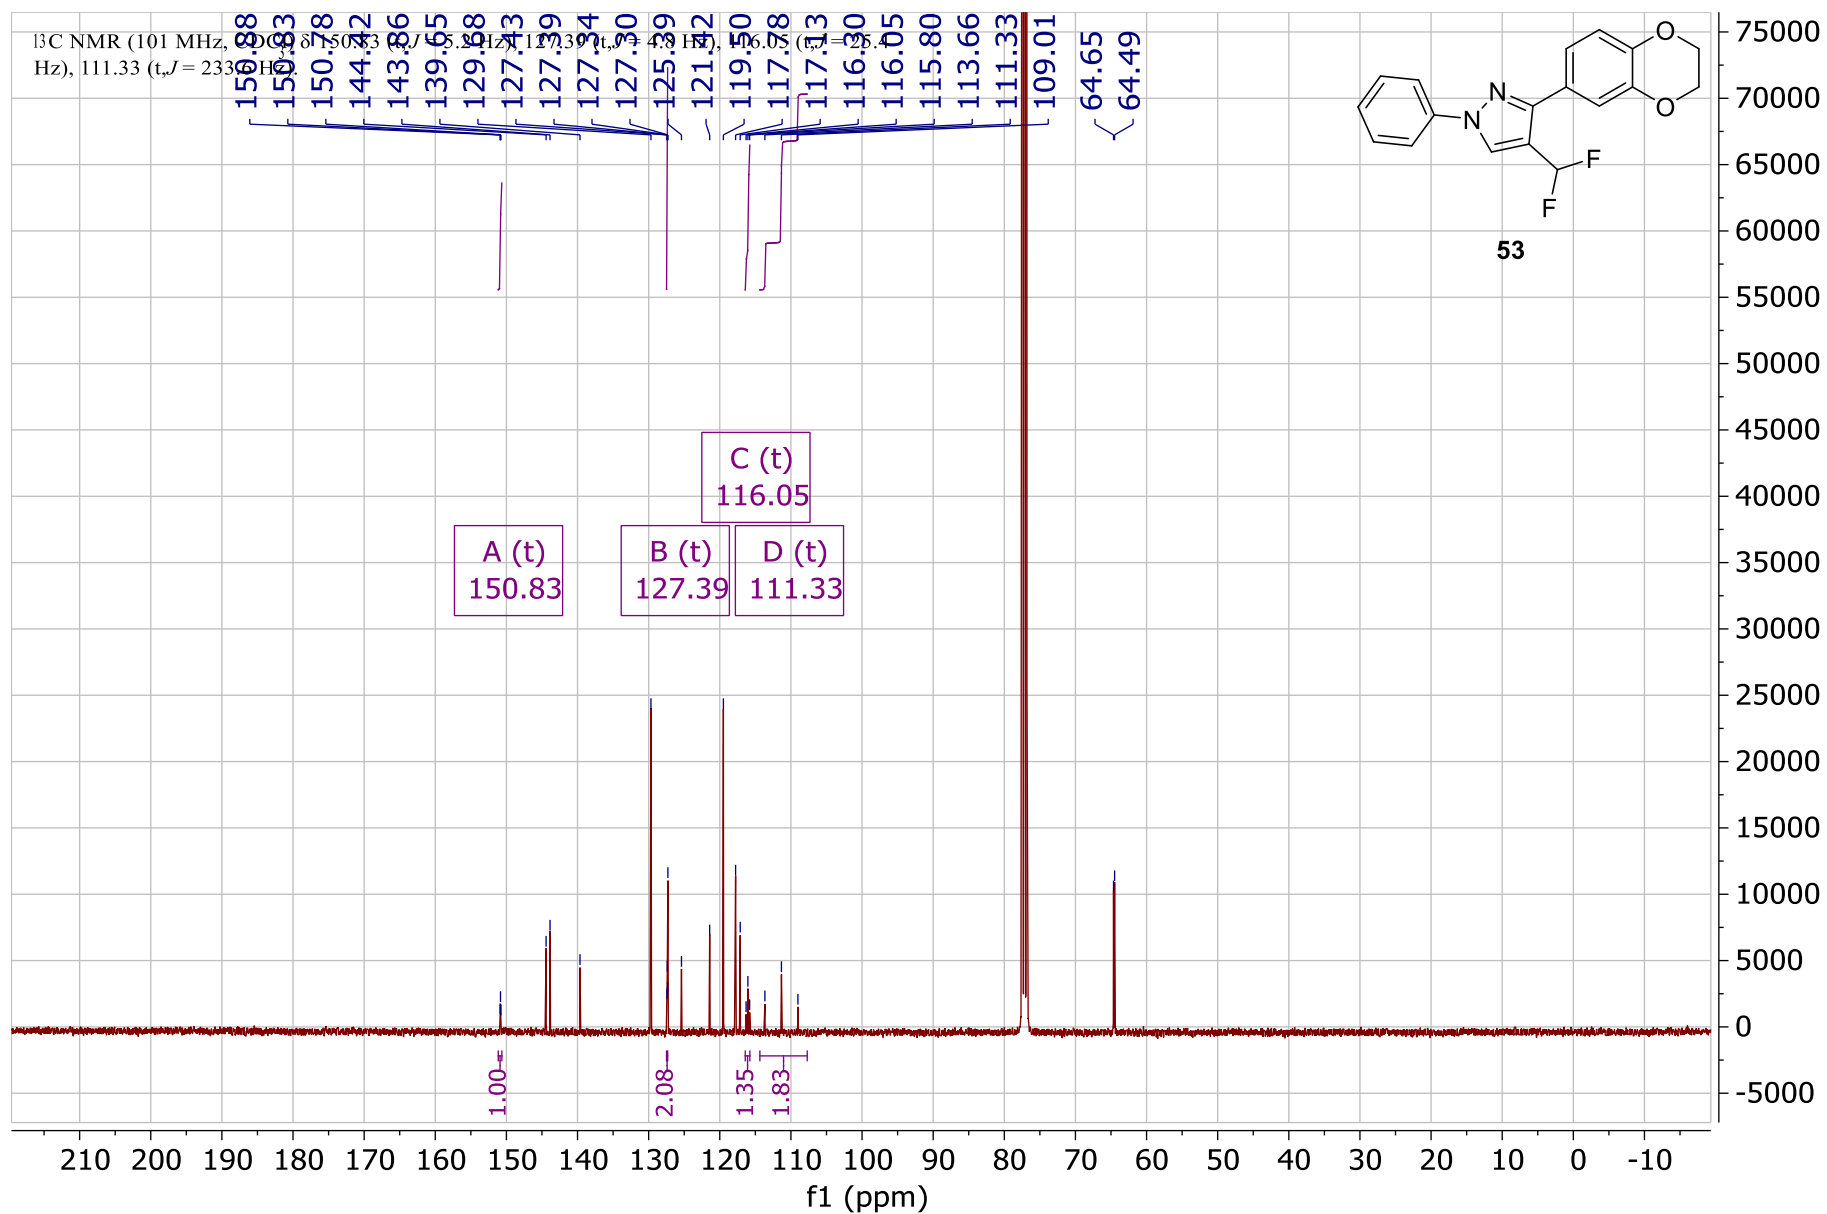

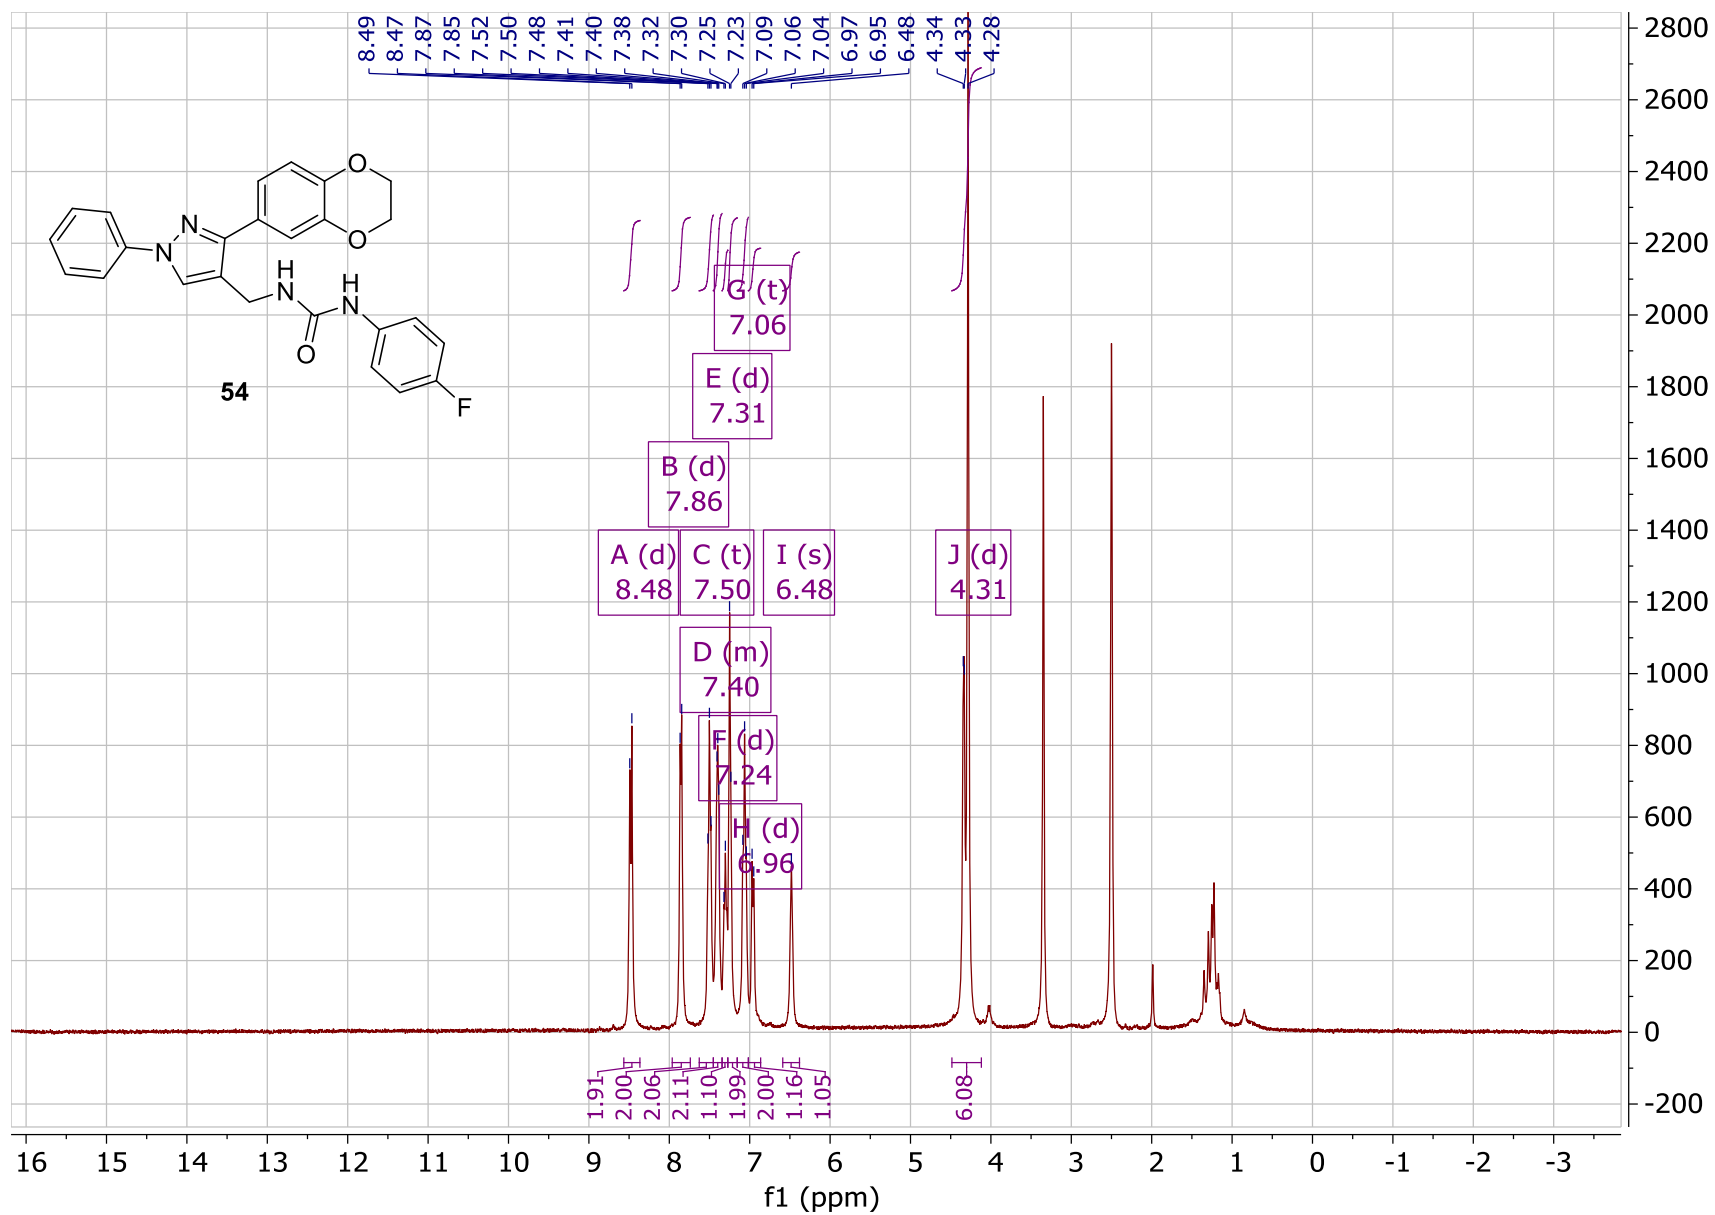



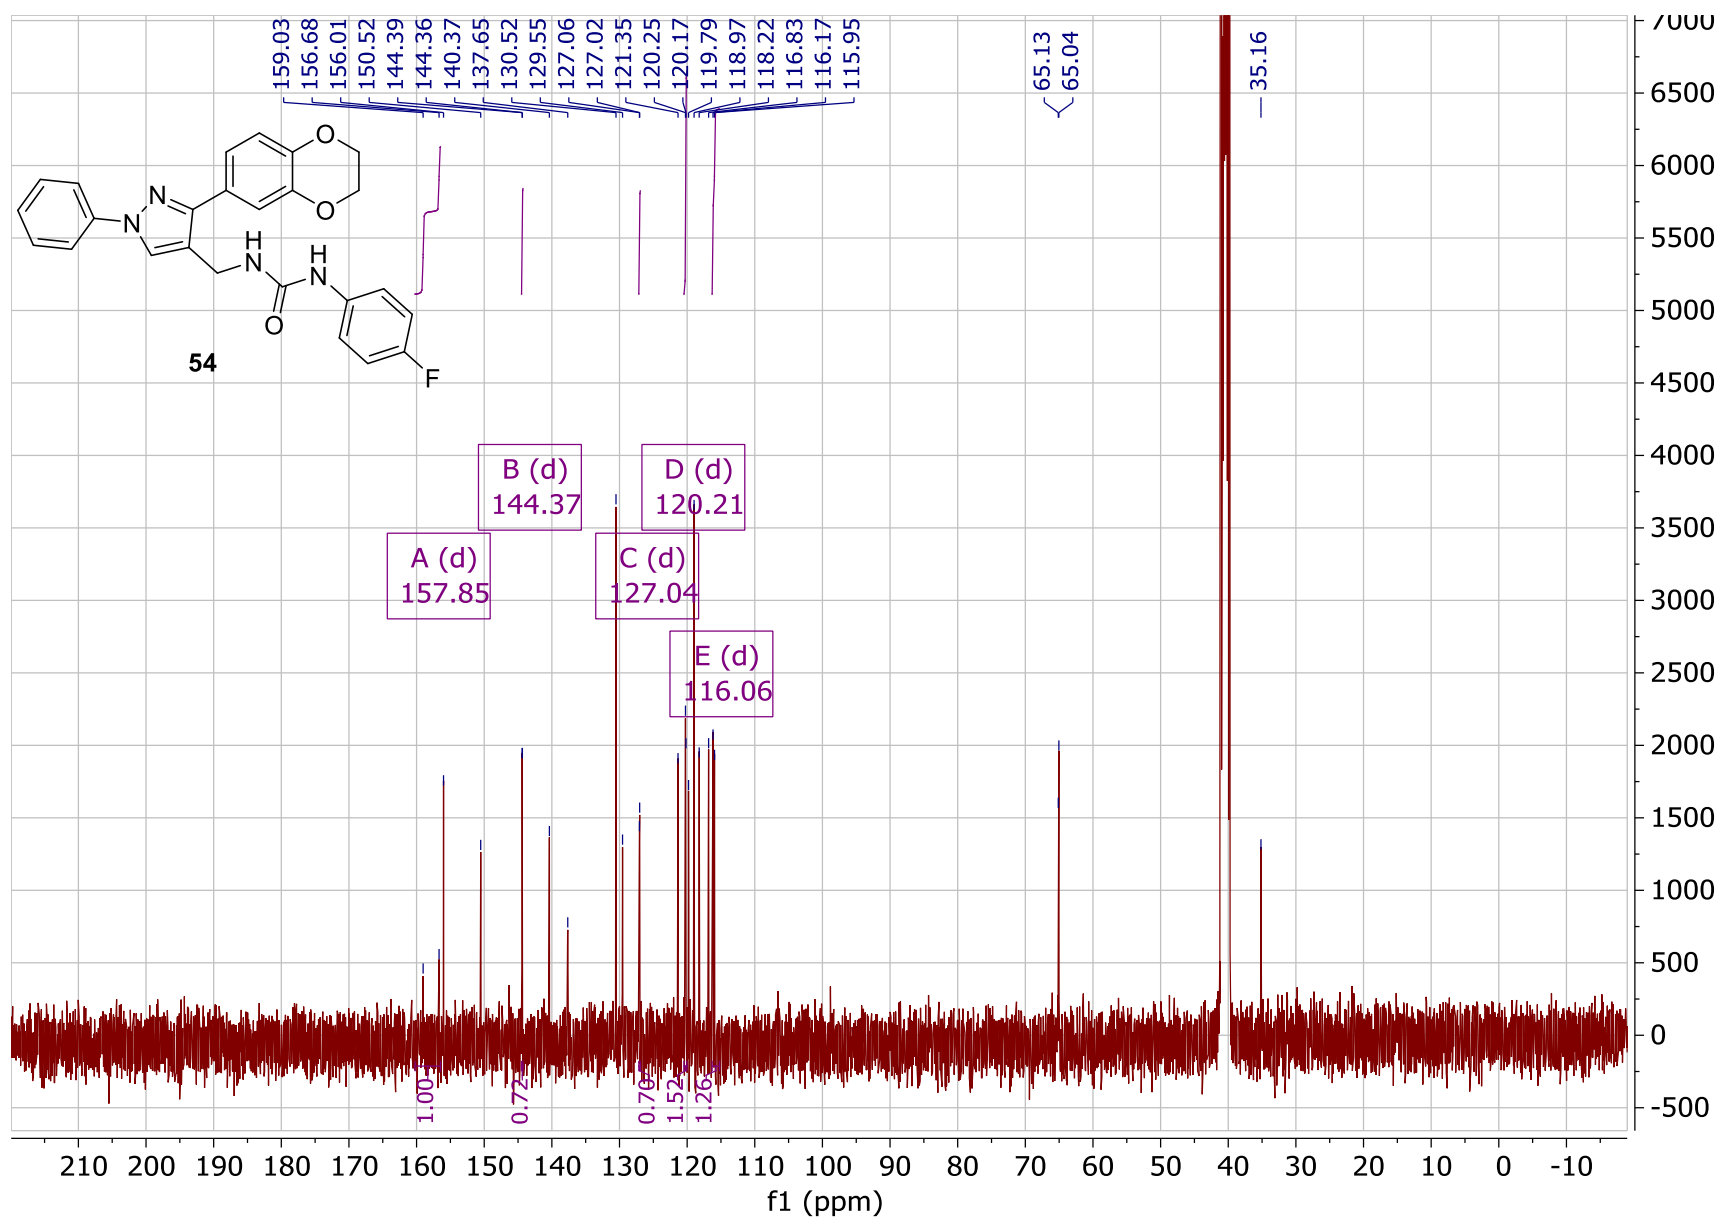

MB-2021-040 HCl  
Dried in vacuum oven

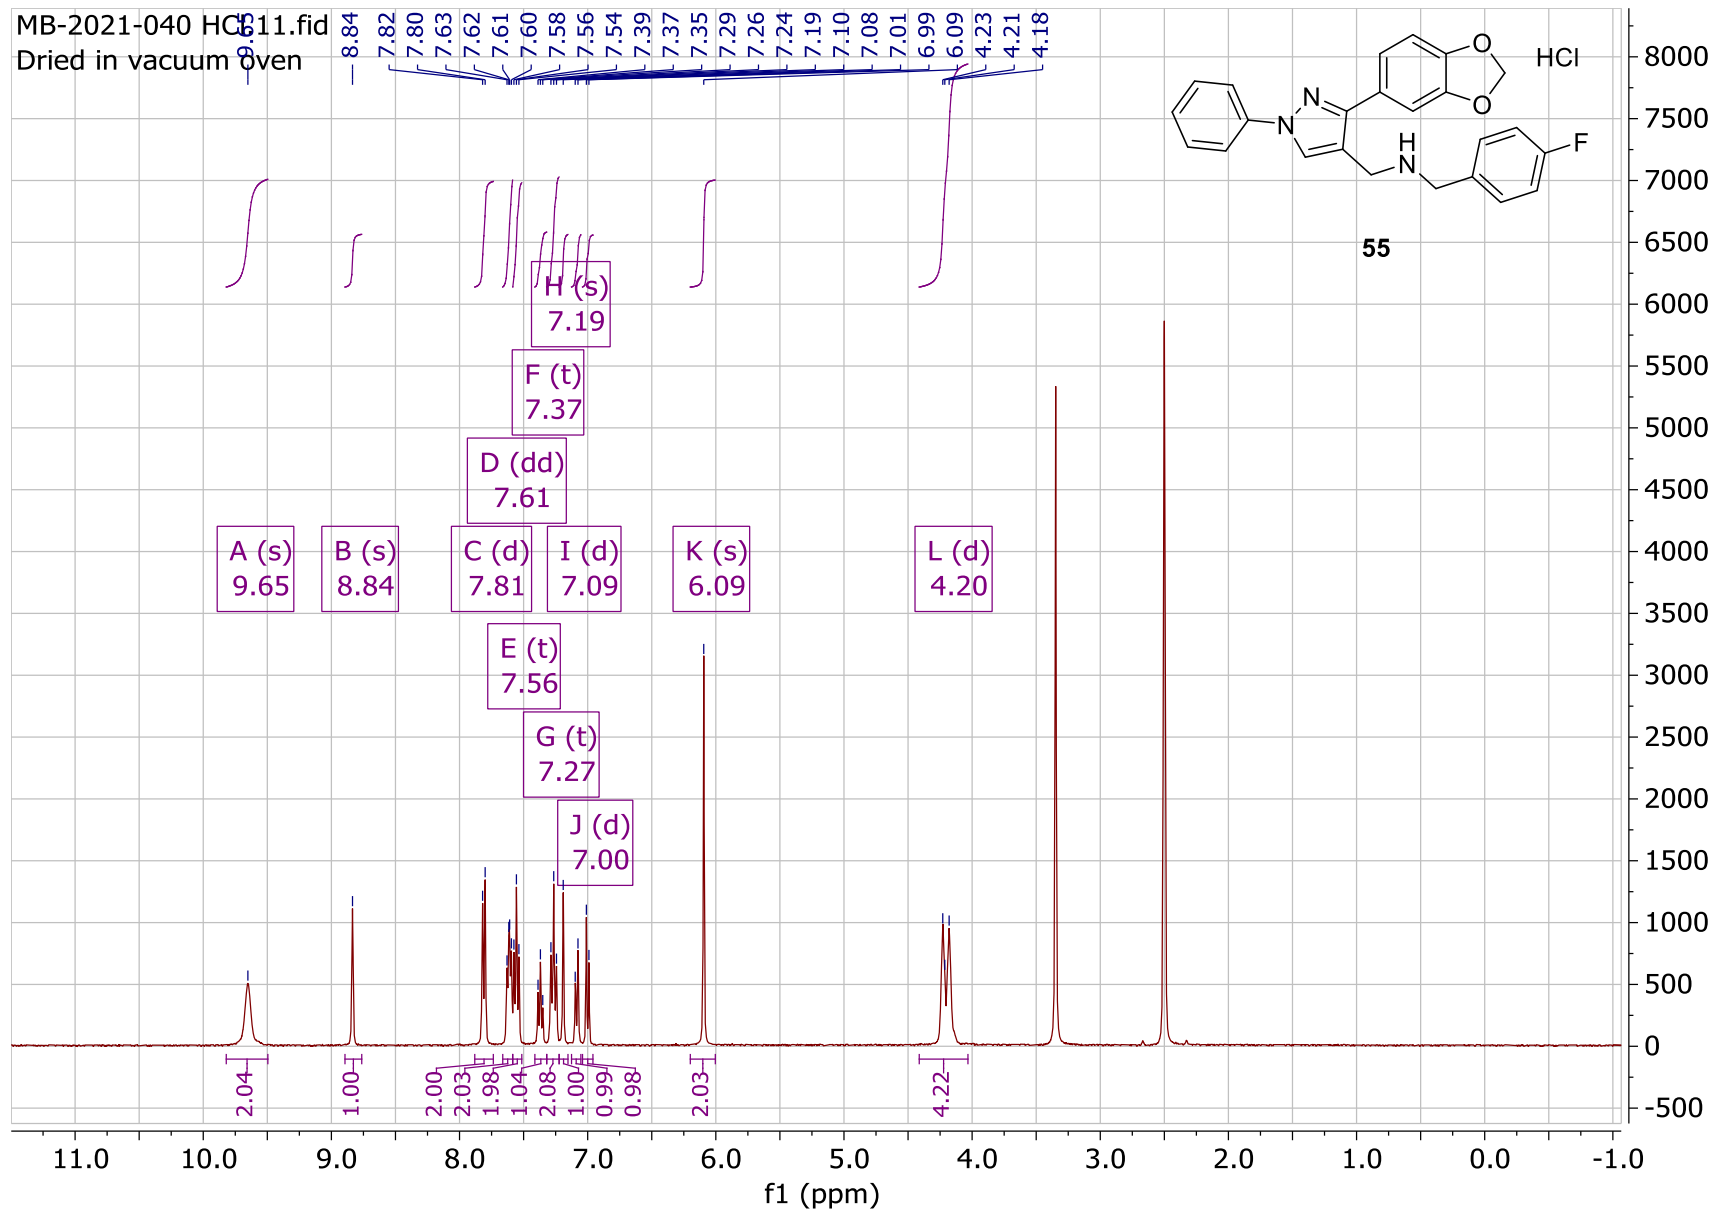

MB-2021-040 HCl.15.fid  
Dried in vacuum oven

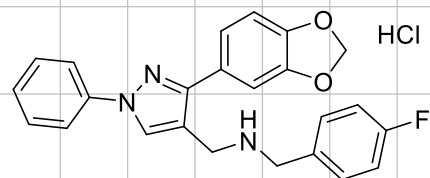

55

164.54  
162.11  
152.18  
148.52  
148.39  
140.13  
133.65  
133.60  
133.57  
131.36  
130.72  
129.06  
129.03  
127.71  
126.73  
123.02  
119.32  
116.45  
116.24  
112.81  
109.41  
102.23

49.69

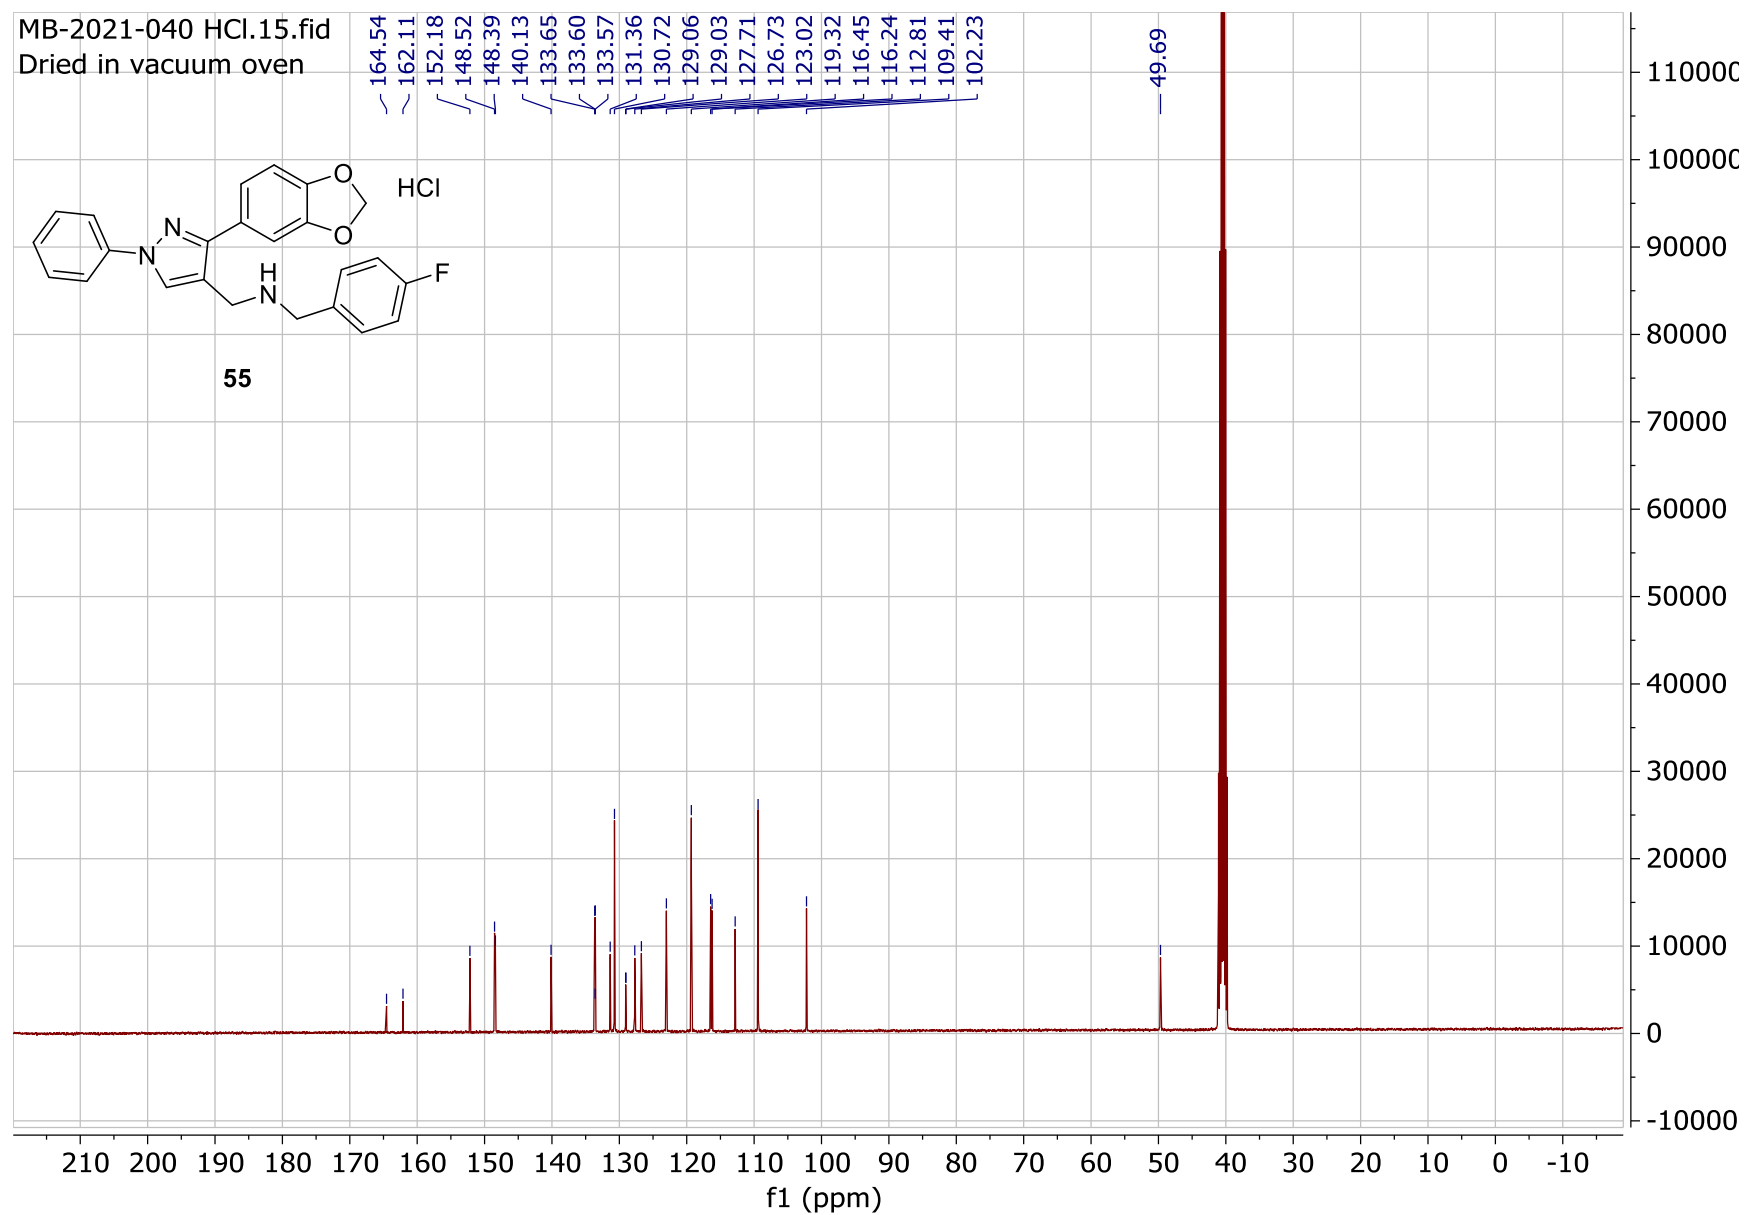

MB-2021-044HCl.10.fid

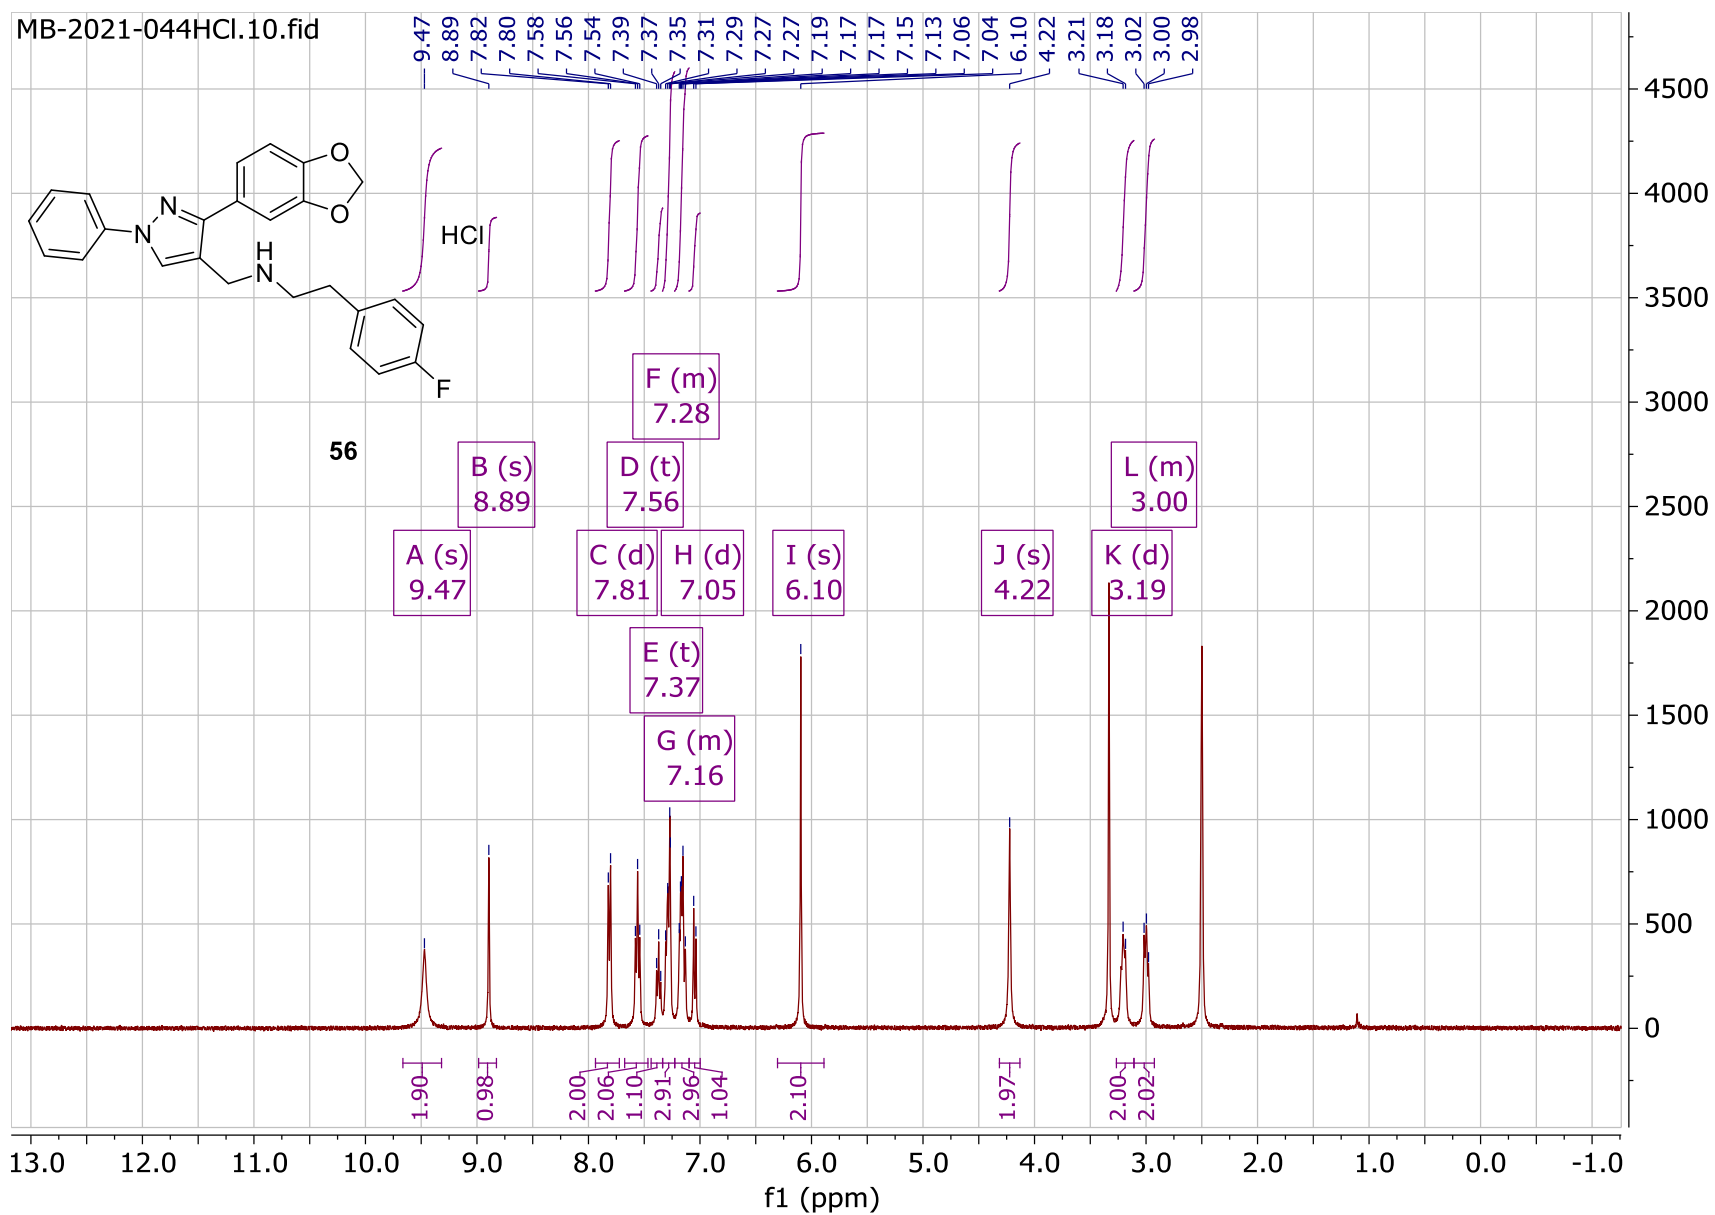

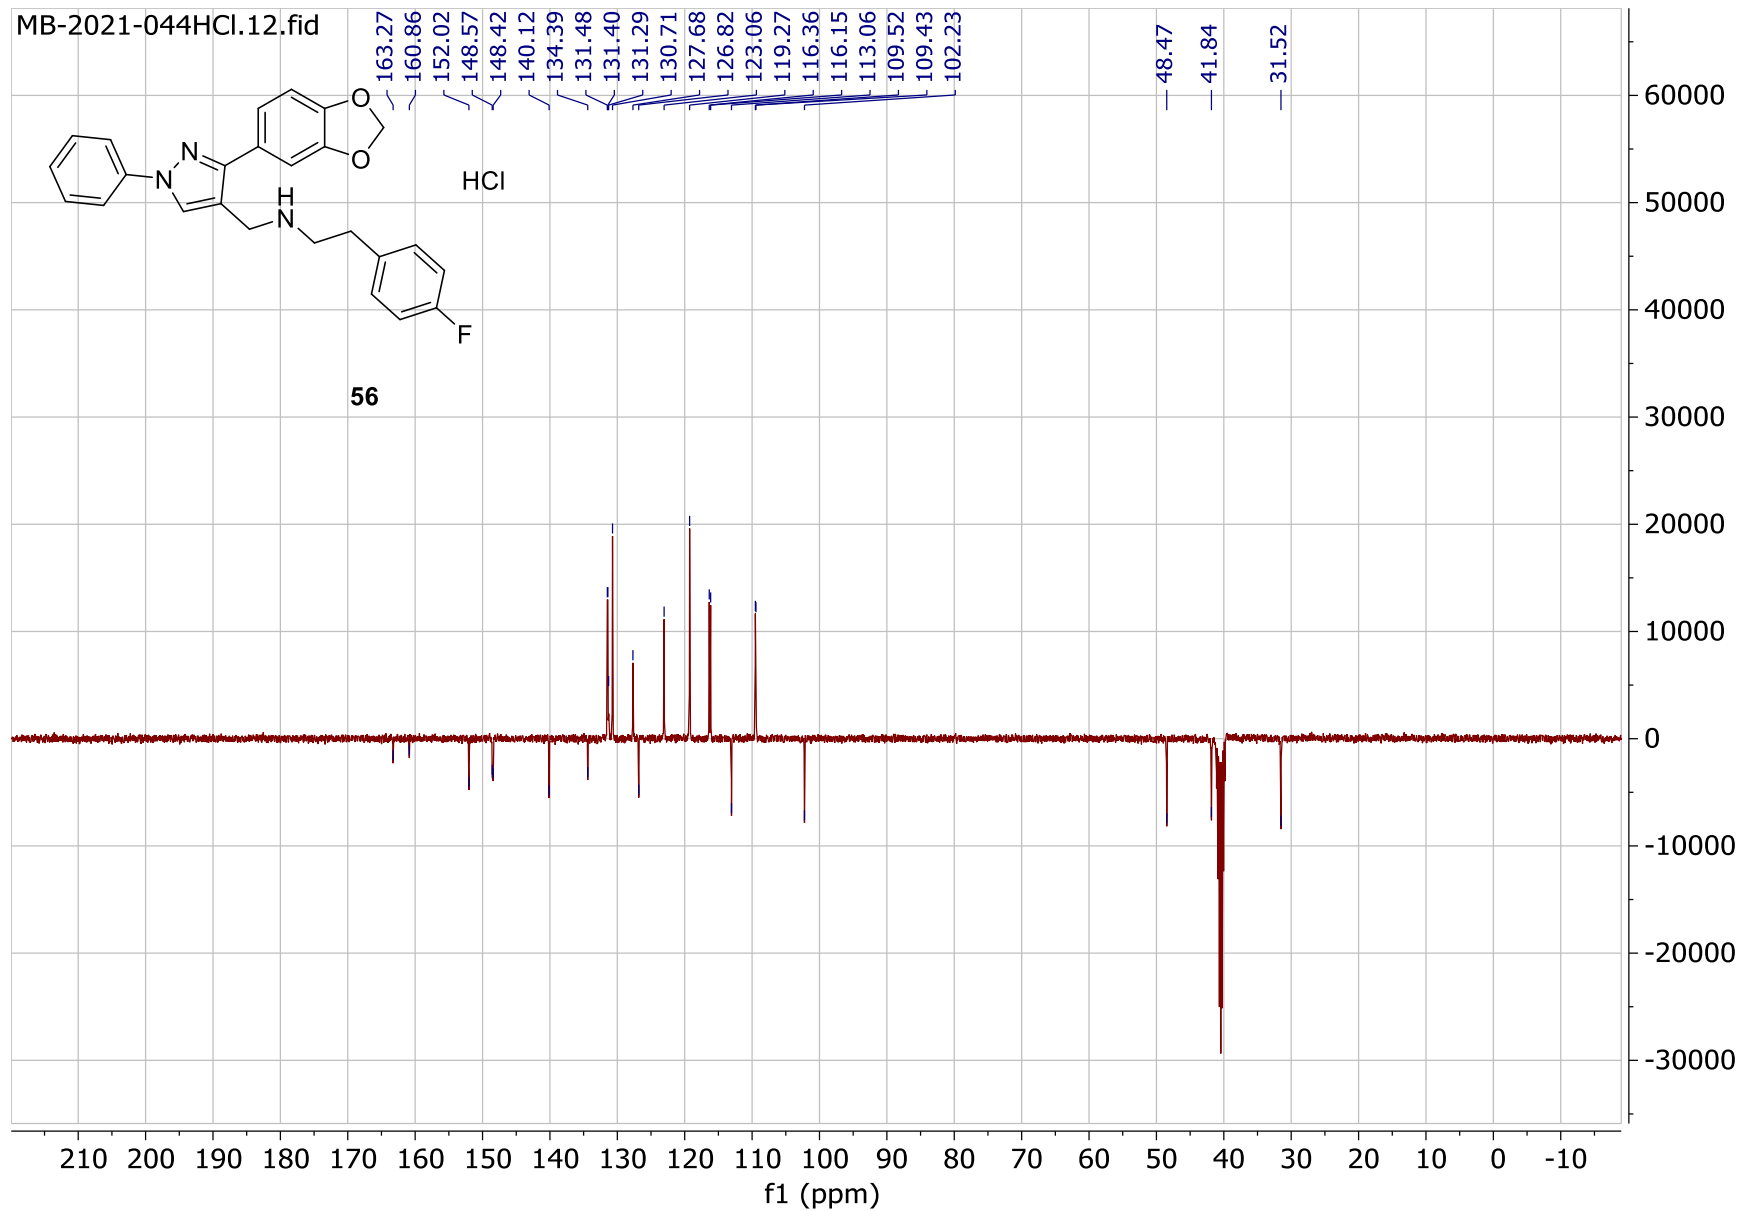

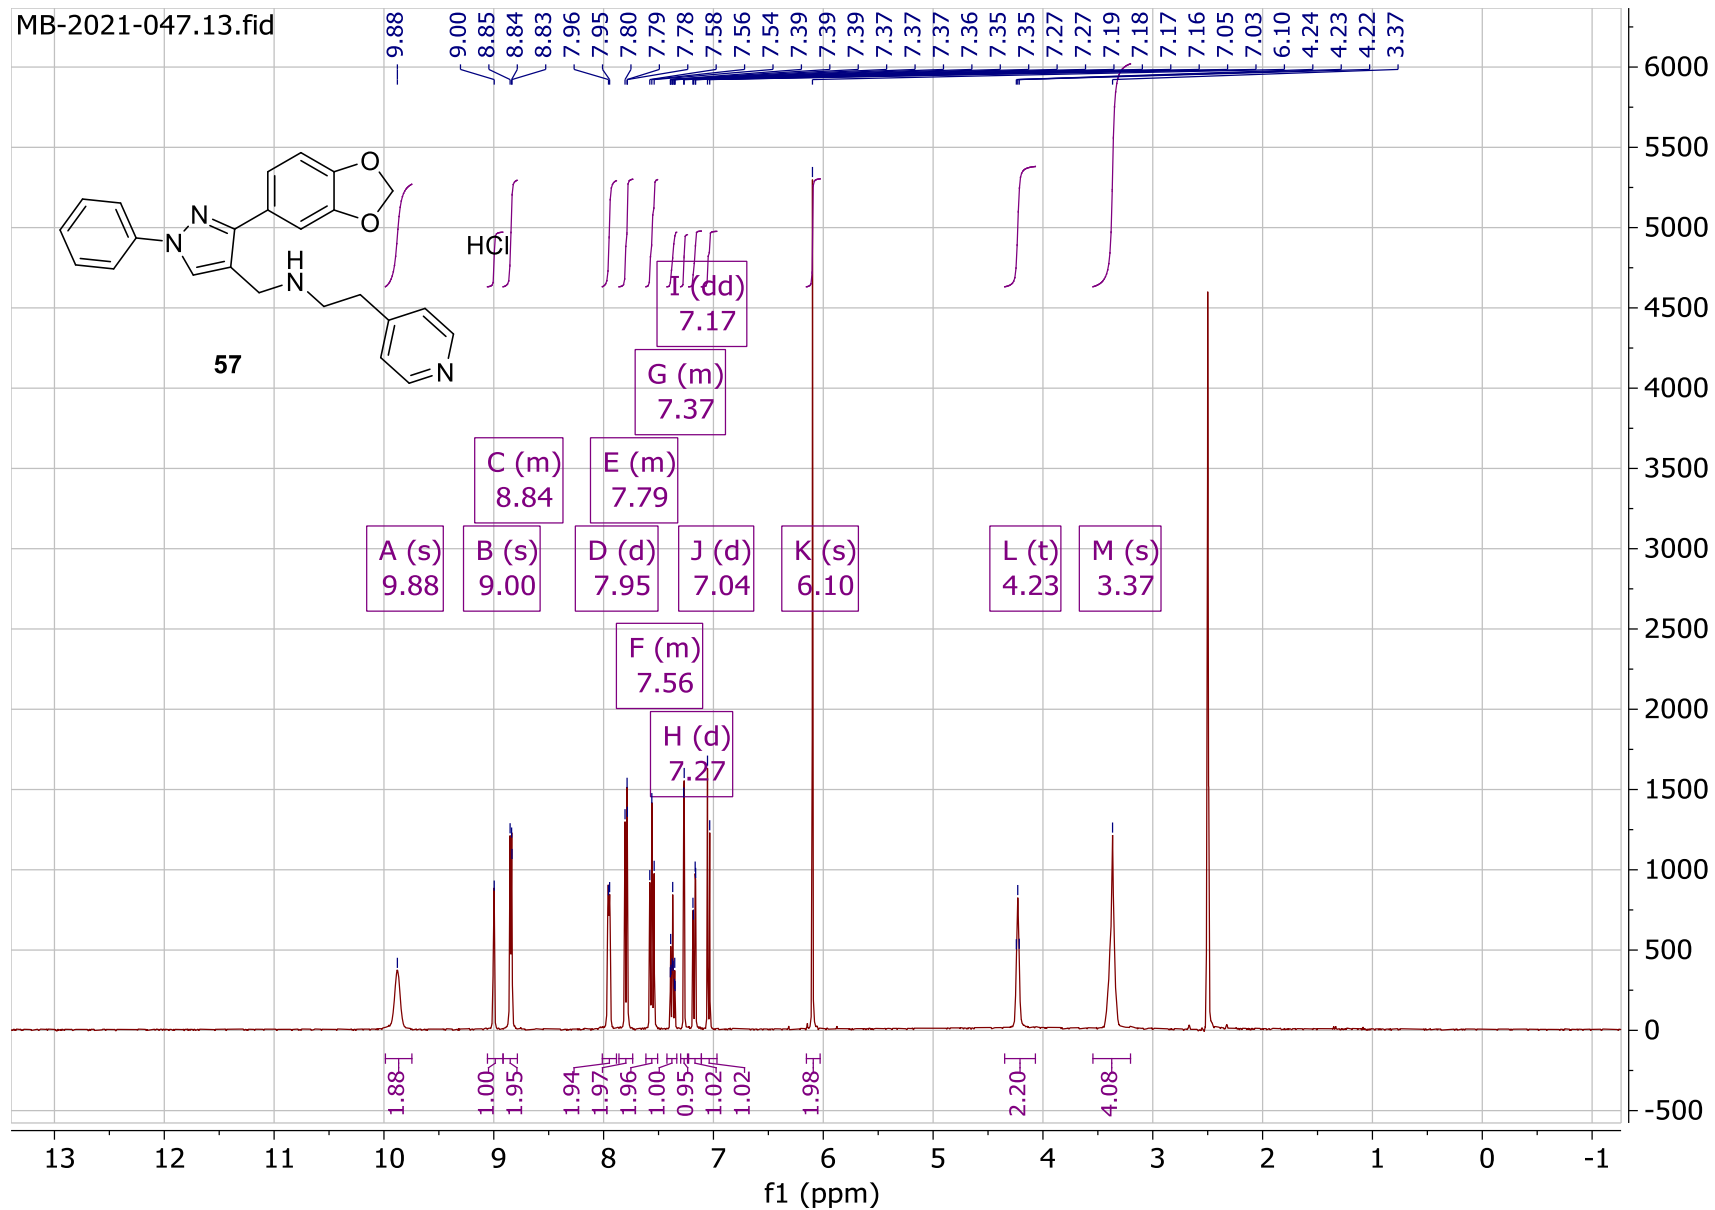

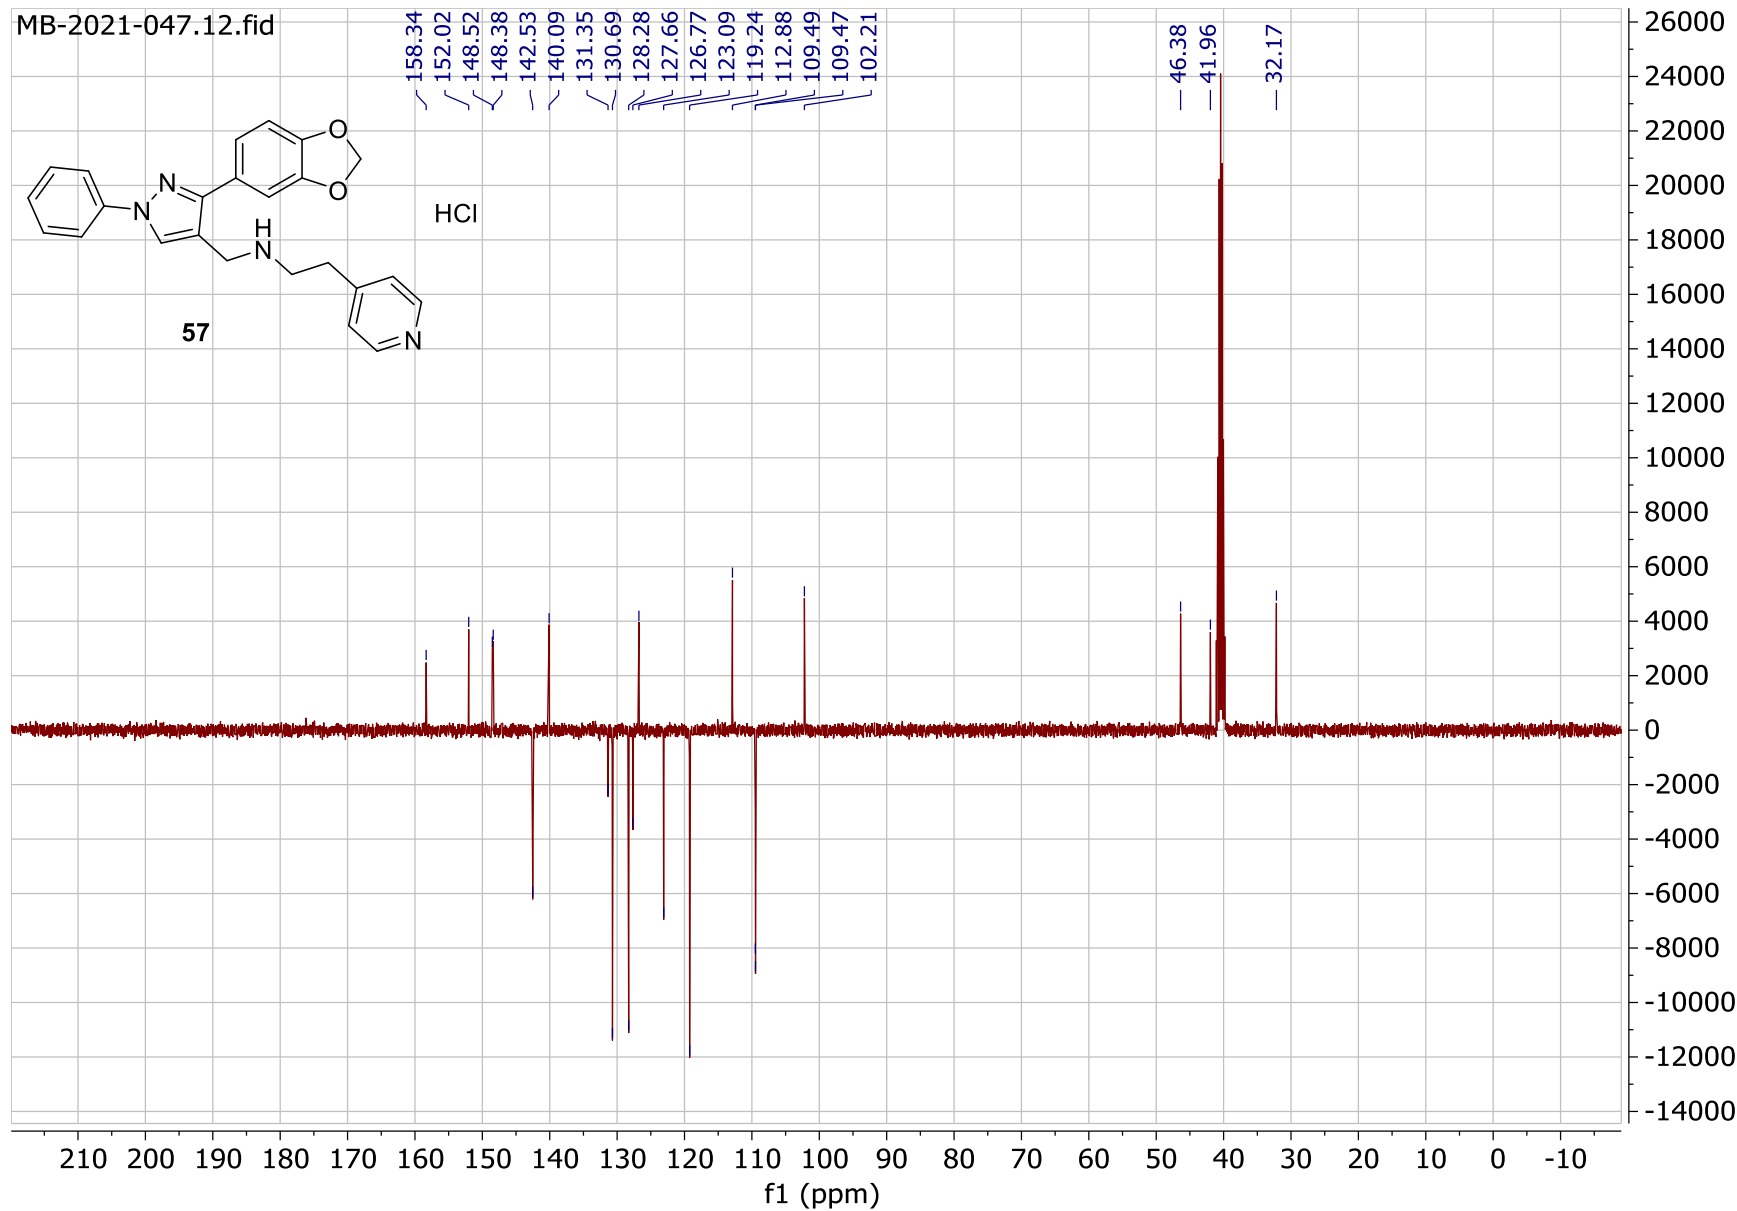

MB-2021-046.10.fid

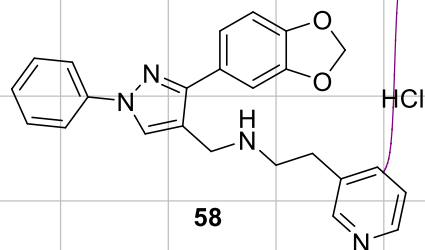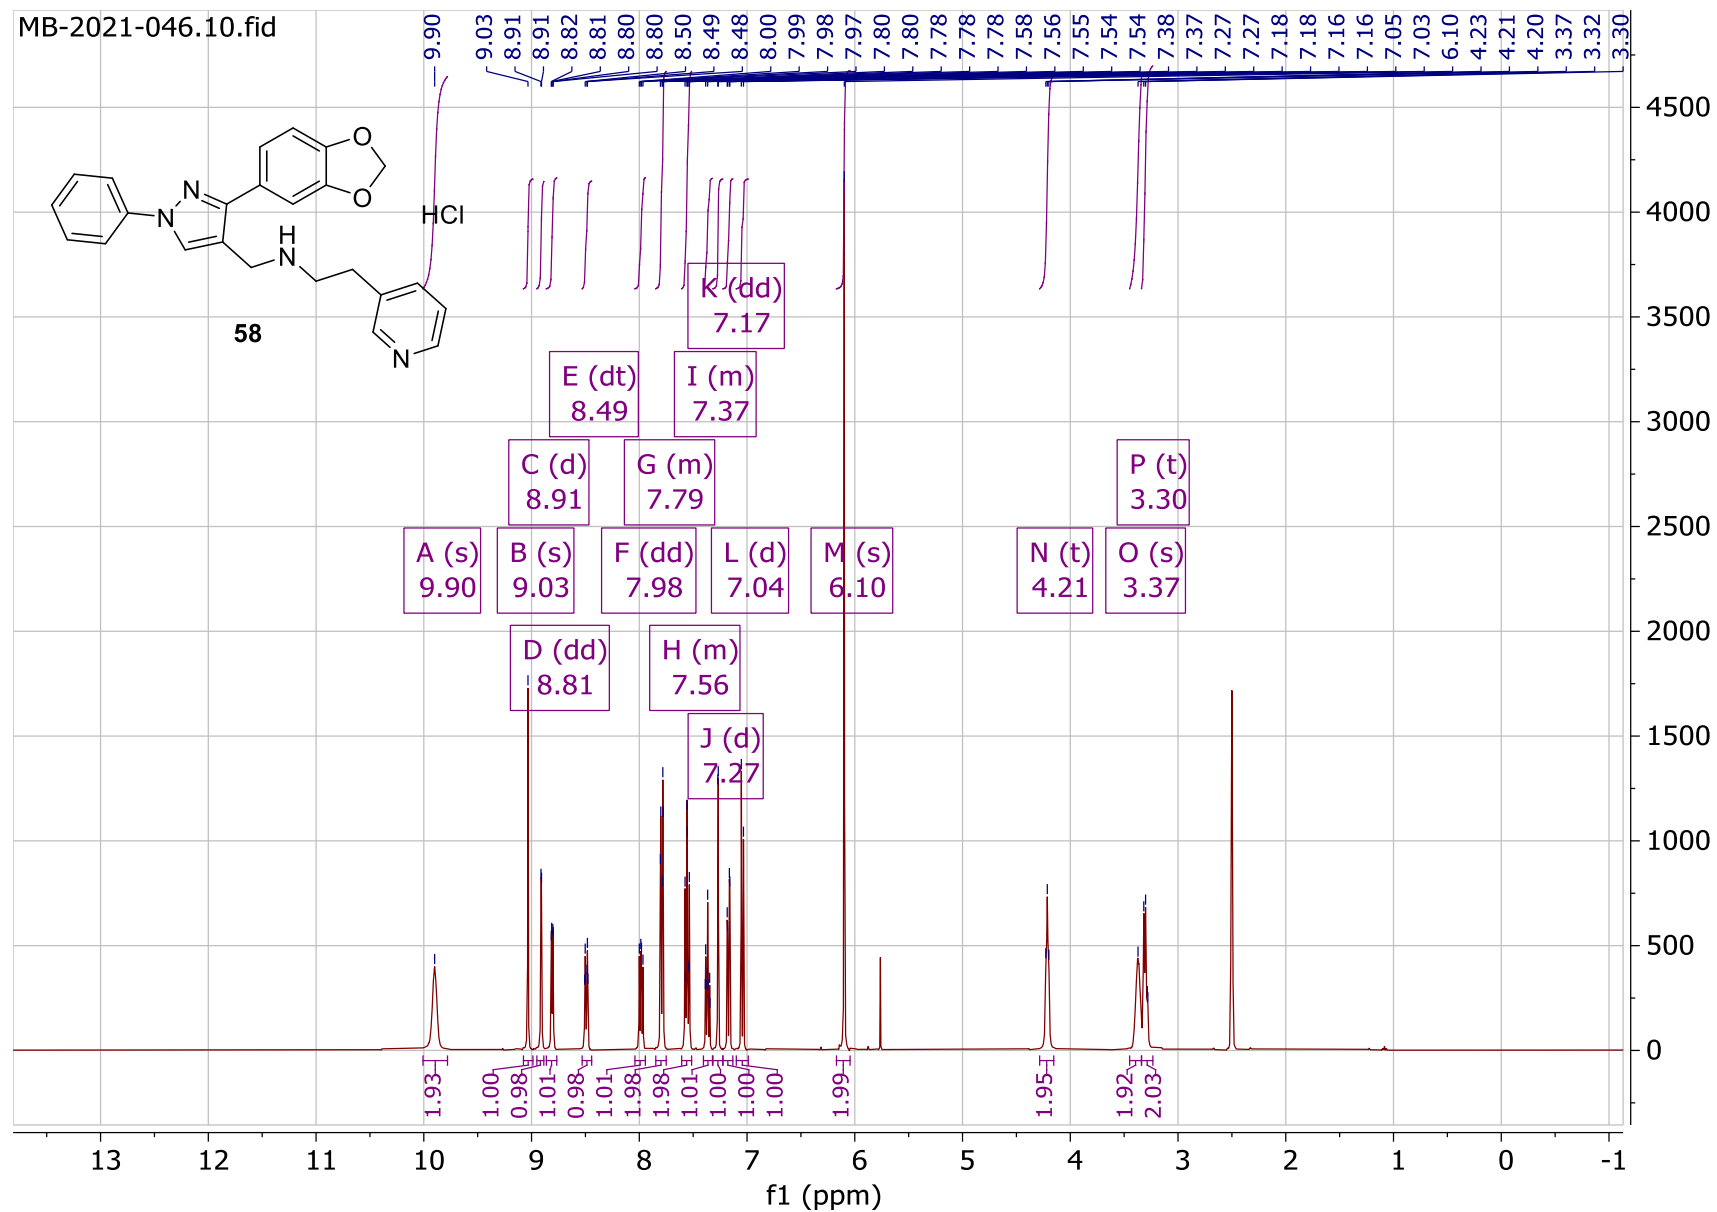



MB-2021-046.12.fid

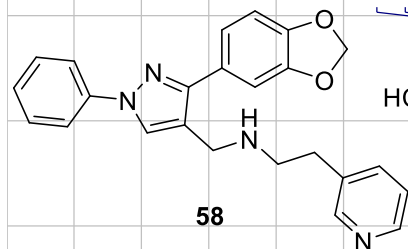

152.02  
148.54  
148.40  
146.47  
143.55  
141.61  
140.09  
137.92  
131.32  
130.69  
127.68  
127.53  
126.76  
123.06  
119.25  
112.87  
109.49  
109.43  
102.21

47.19  
41.98  
29.22

50000  
40000  
30000  
20000  
10000  
0  
-10000  
-20000  
-30000  
-40000

210 200 190 180 170 160 150 140 130 120 110 100 90 80 70 60 50 40 30 20 10 0 -10

f1 (ppm)

MB-2021-039 HCl.12.fid

Dried in vacuum oven

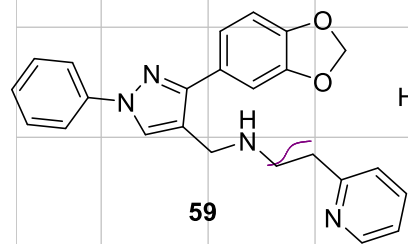

HCl

59

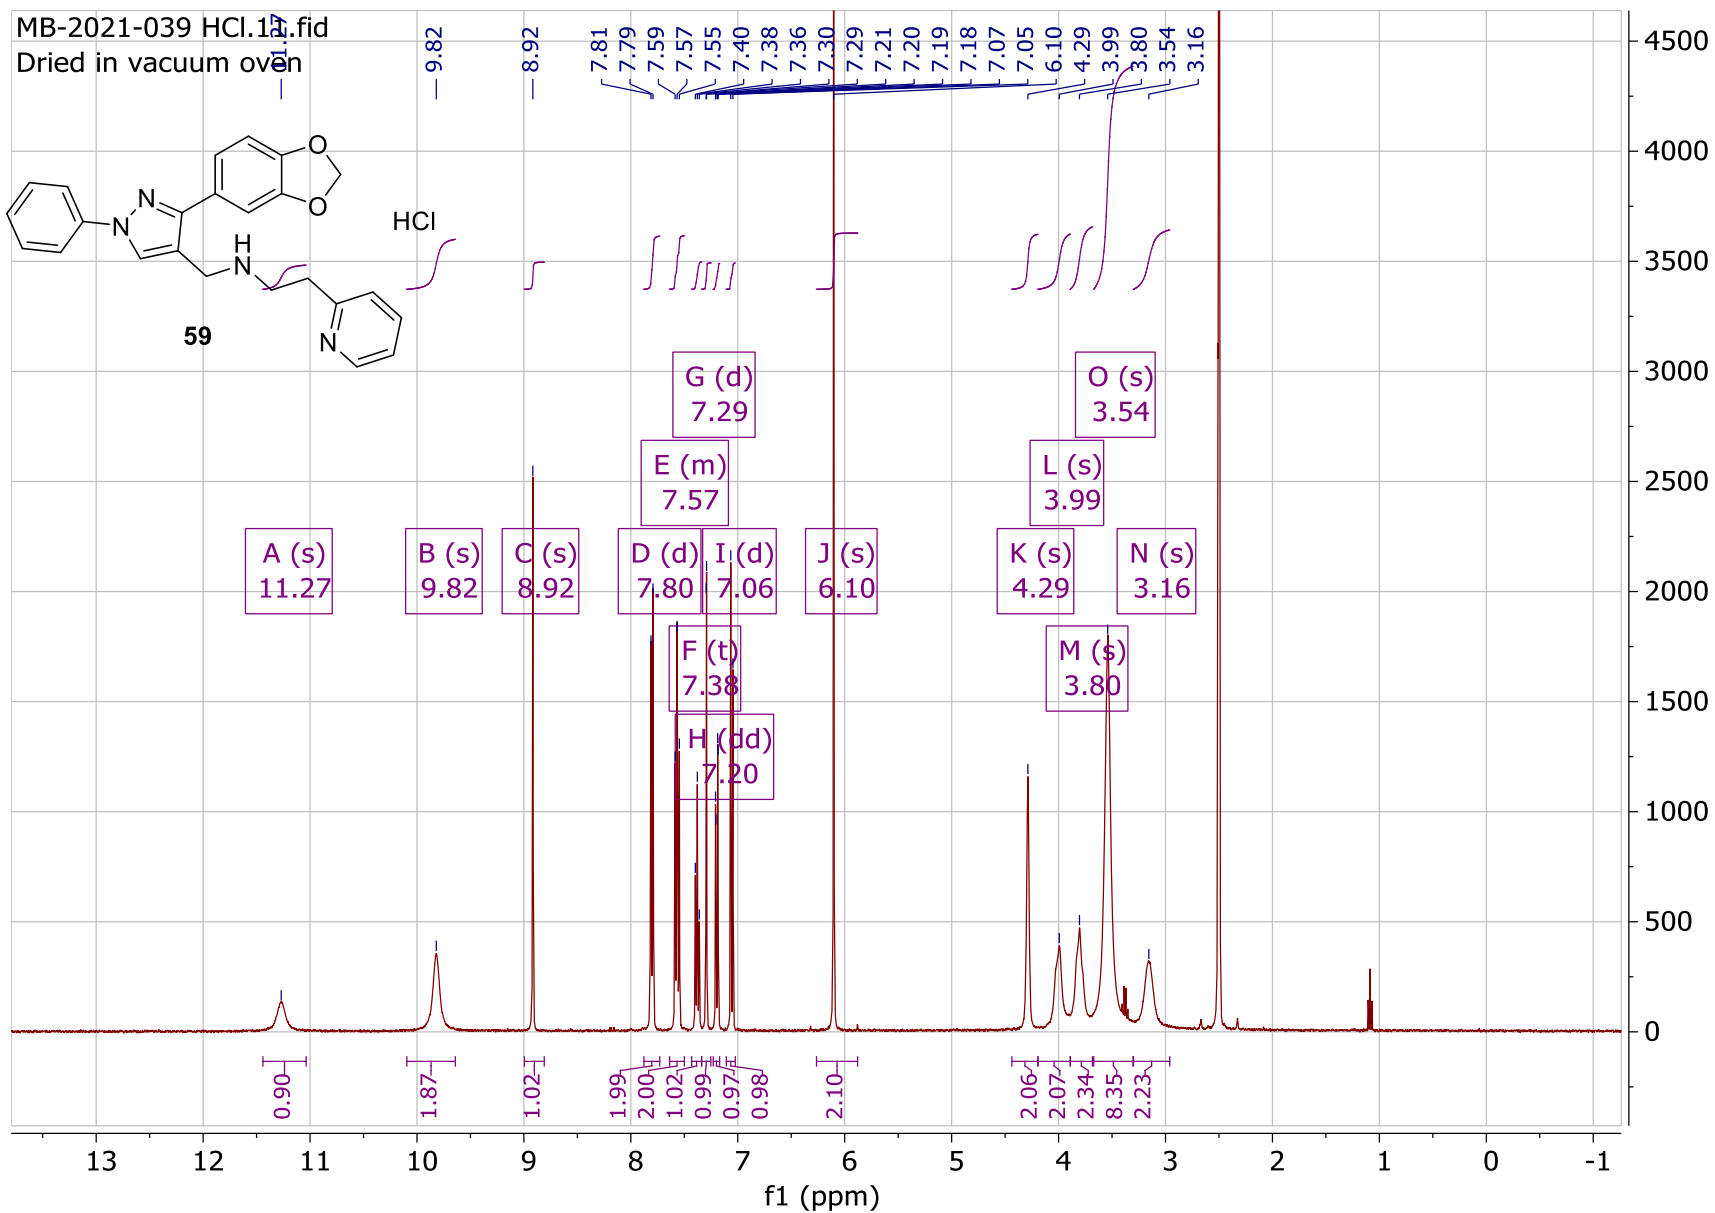

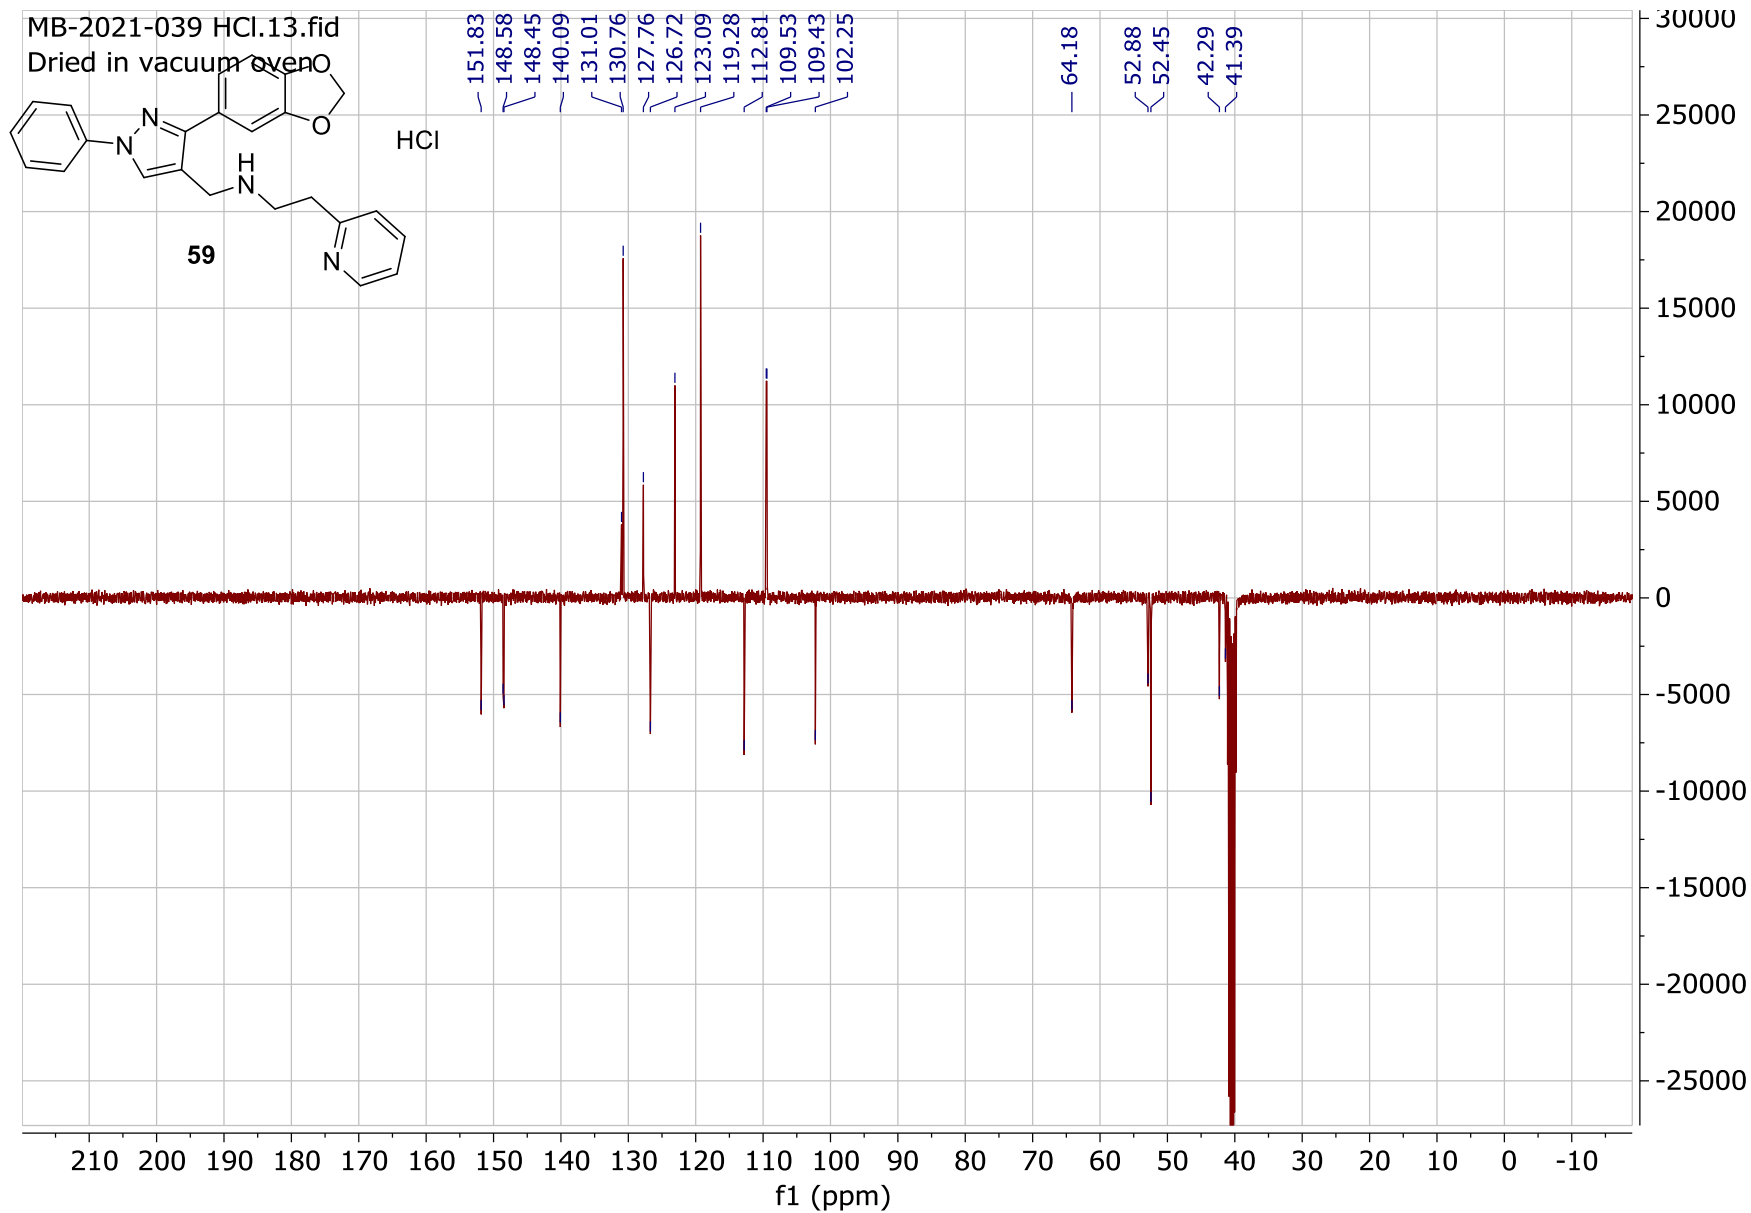

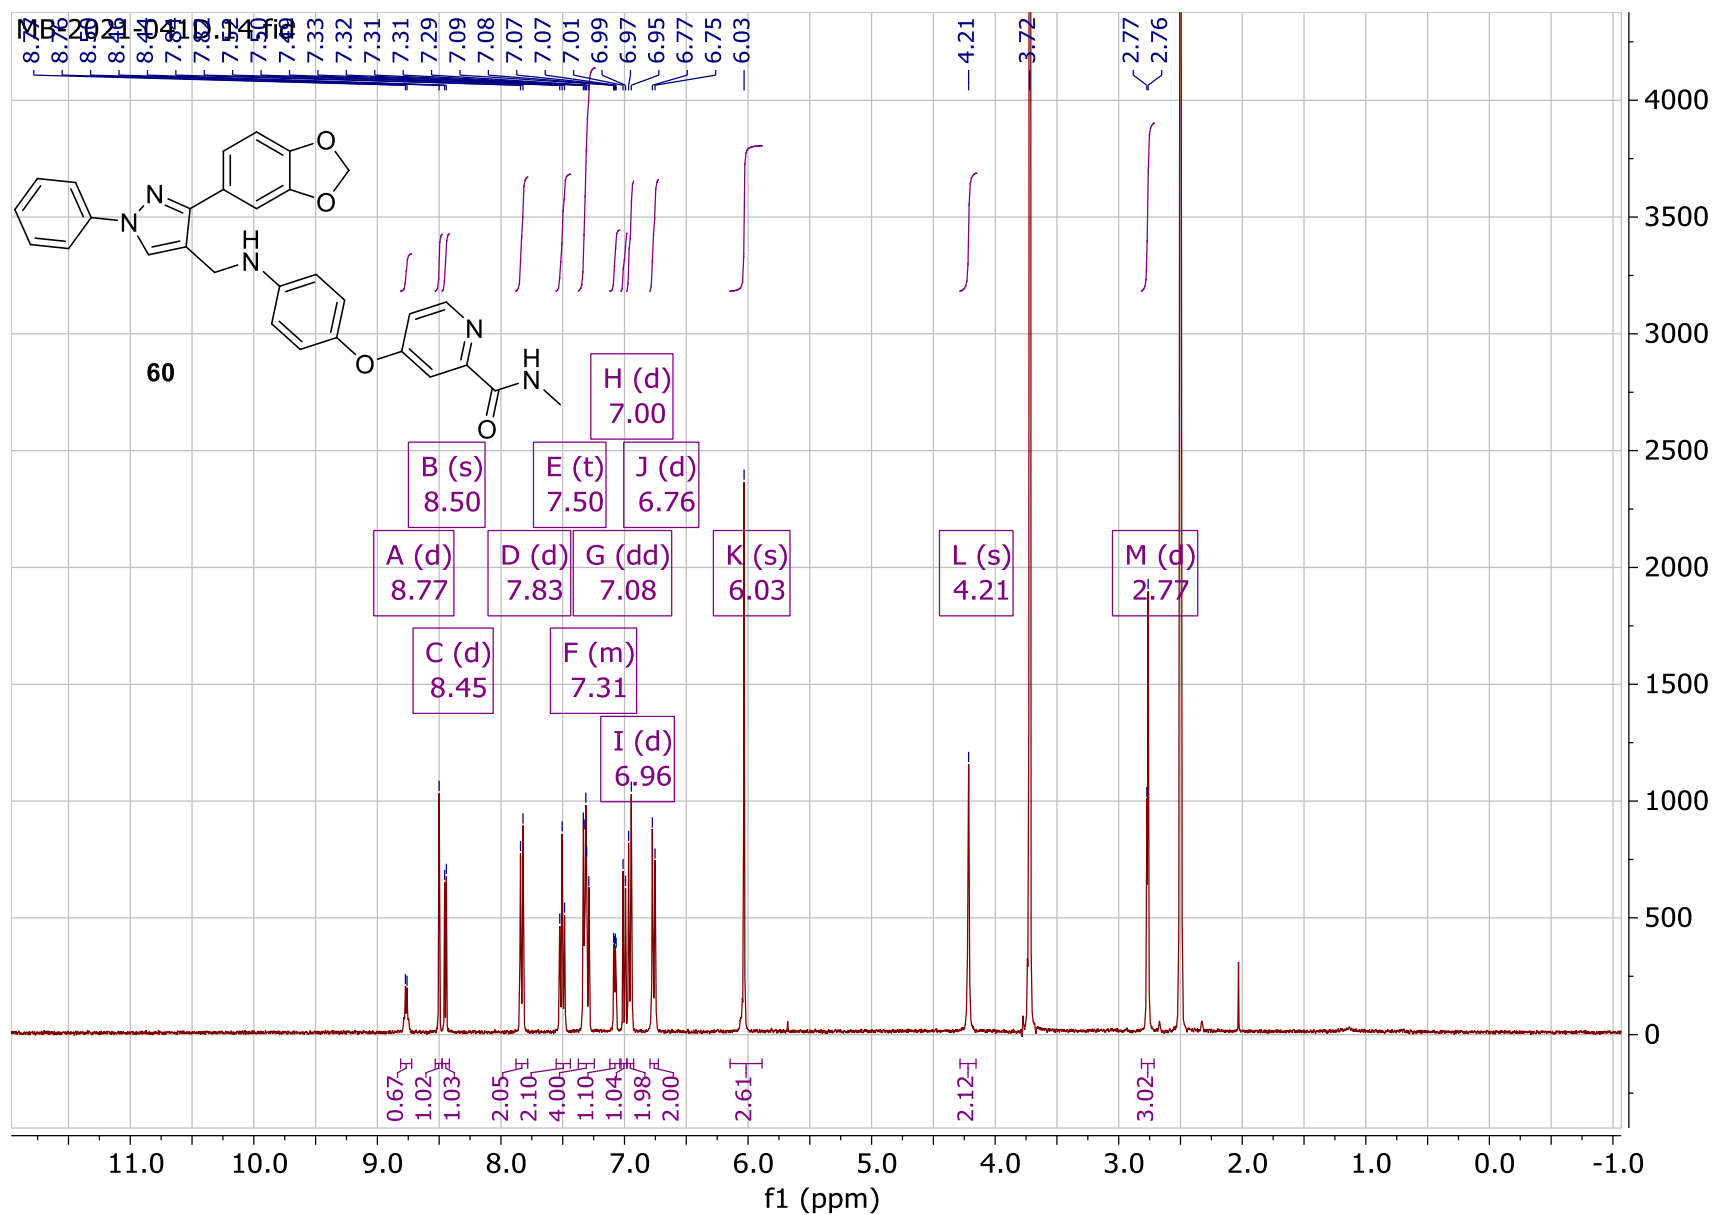

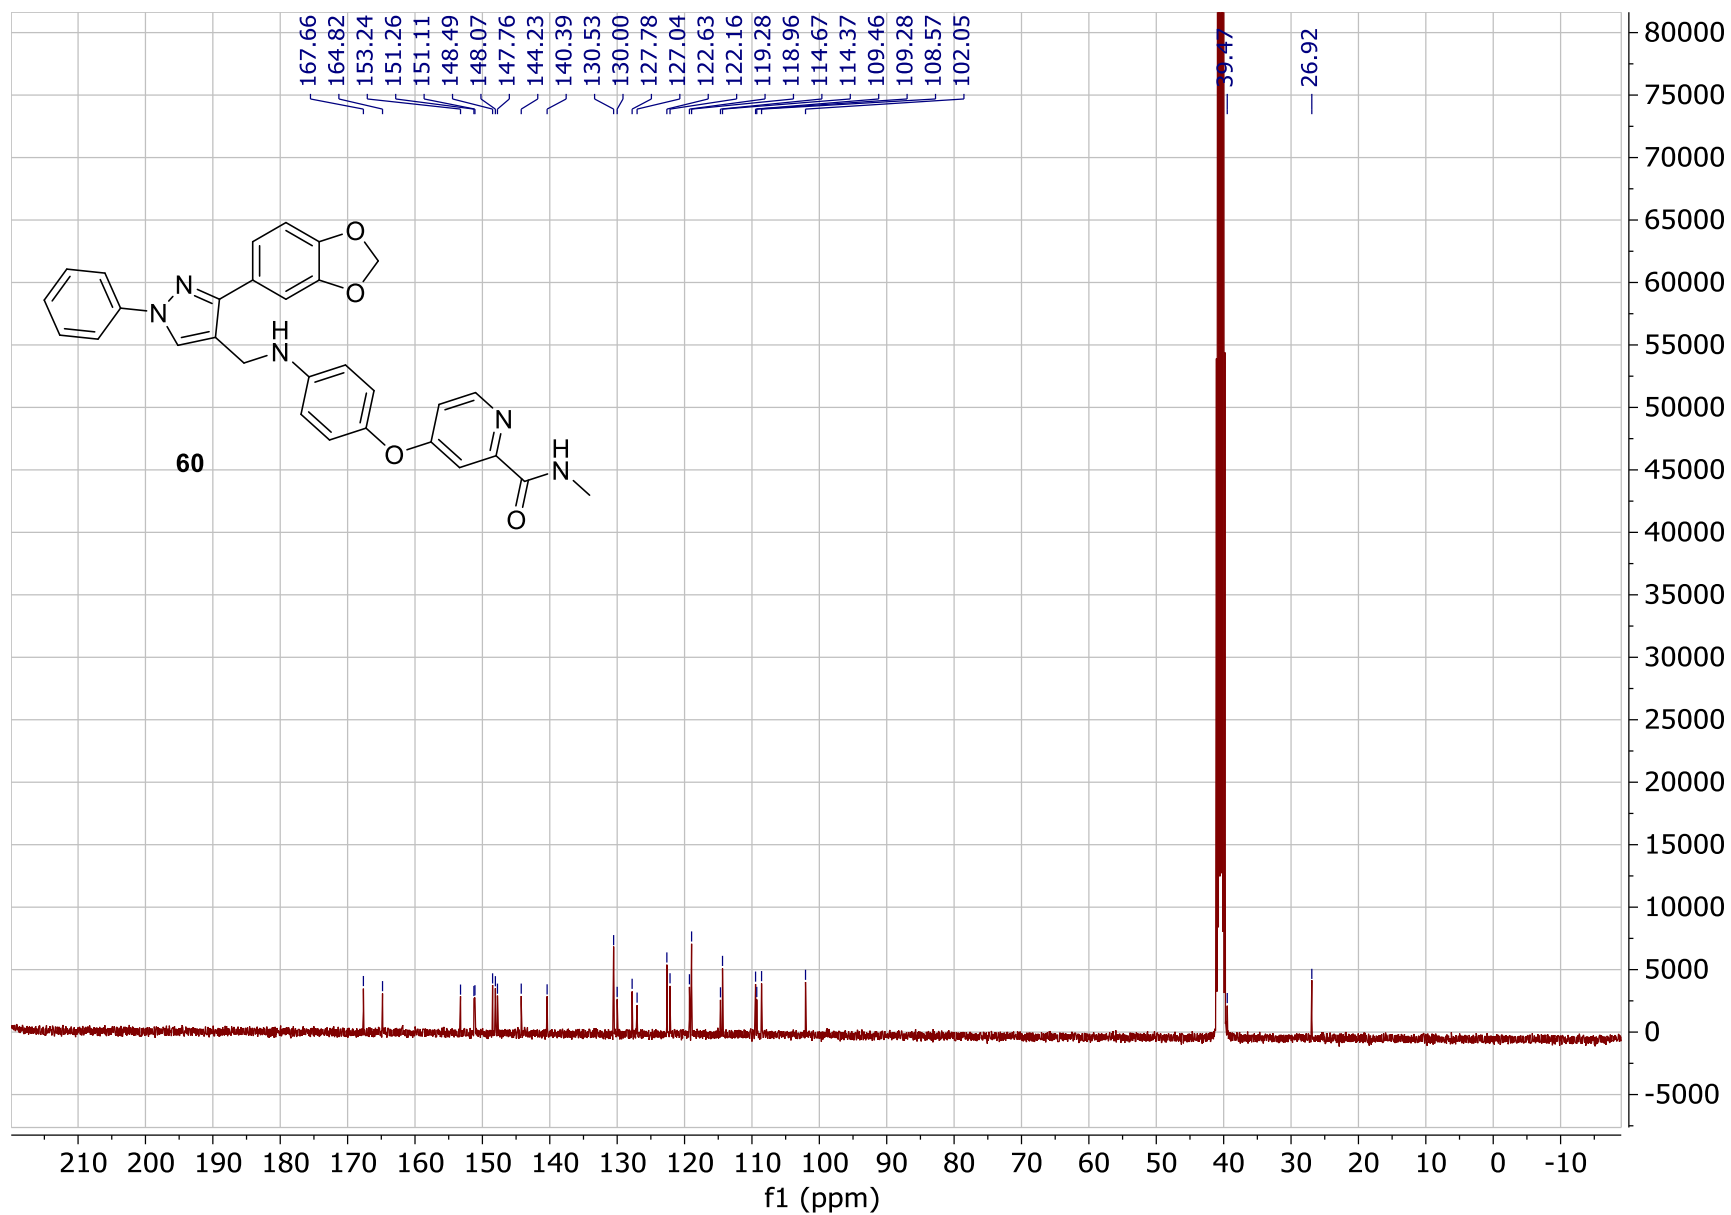

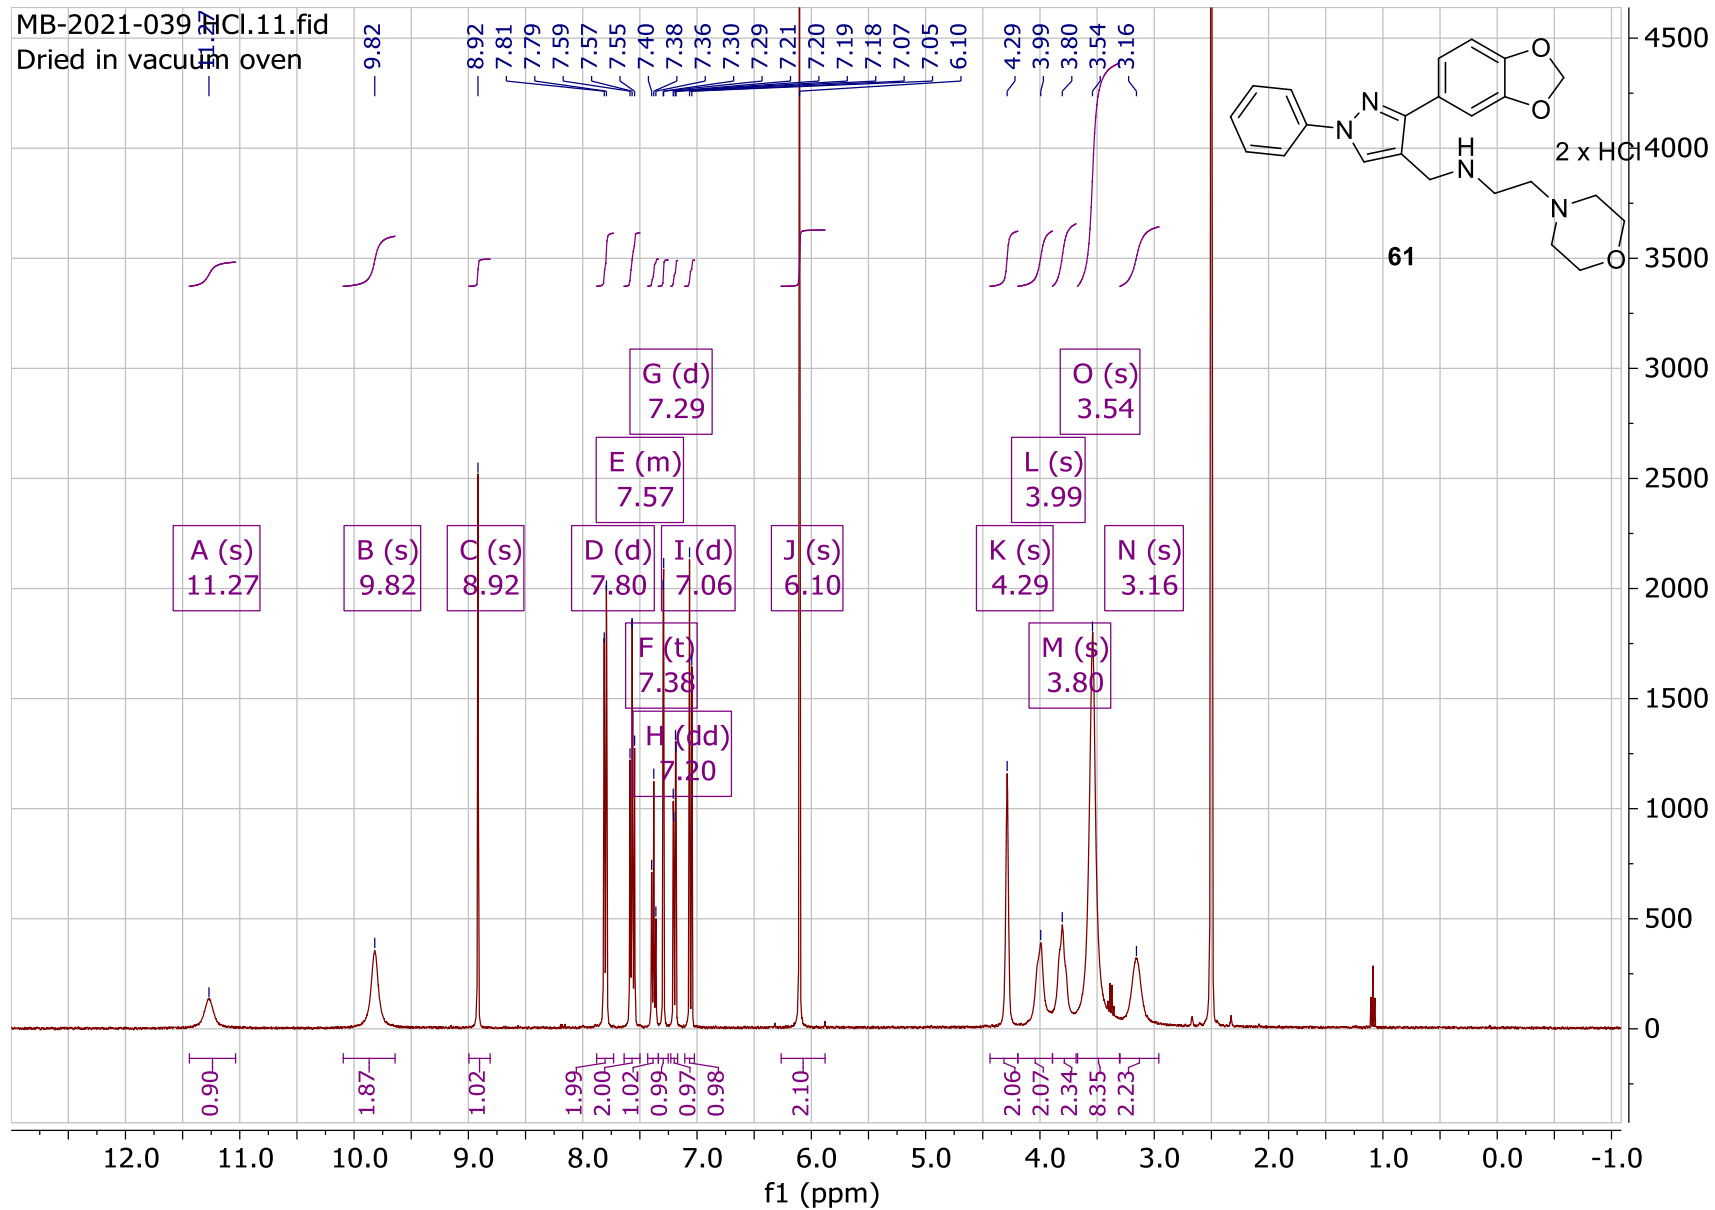

MB-2021-039 HCl.13.fid  
Dried in vacuum oven

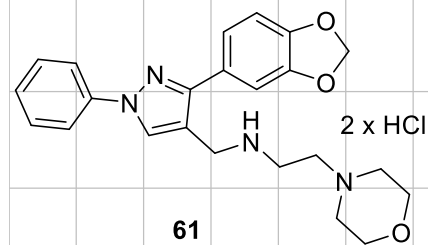

151.83  
148.58  
148.45  
140.09  
131.01  
130.76  
127.76  
126.72  
123.09  
119.28  
112.81  
109.53  
109.43  
102.25

64.18

52.88  
52.45

42.29  
41.39

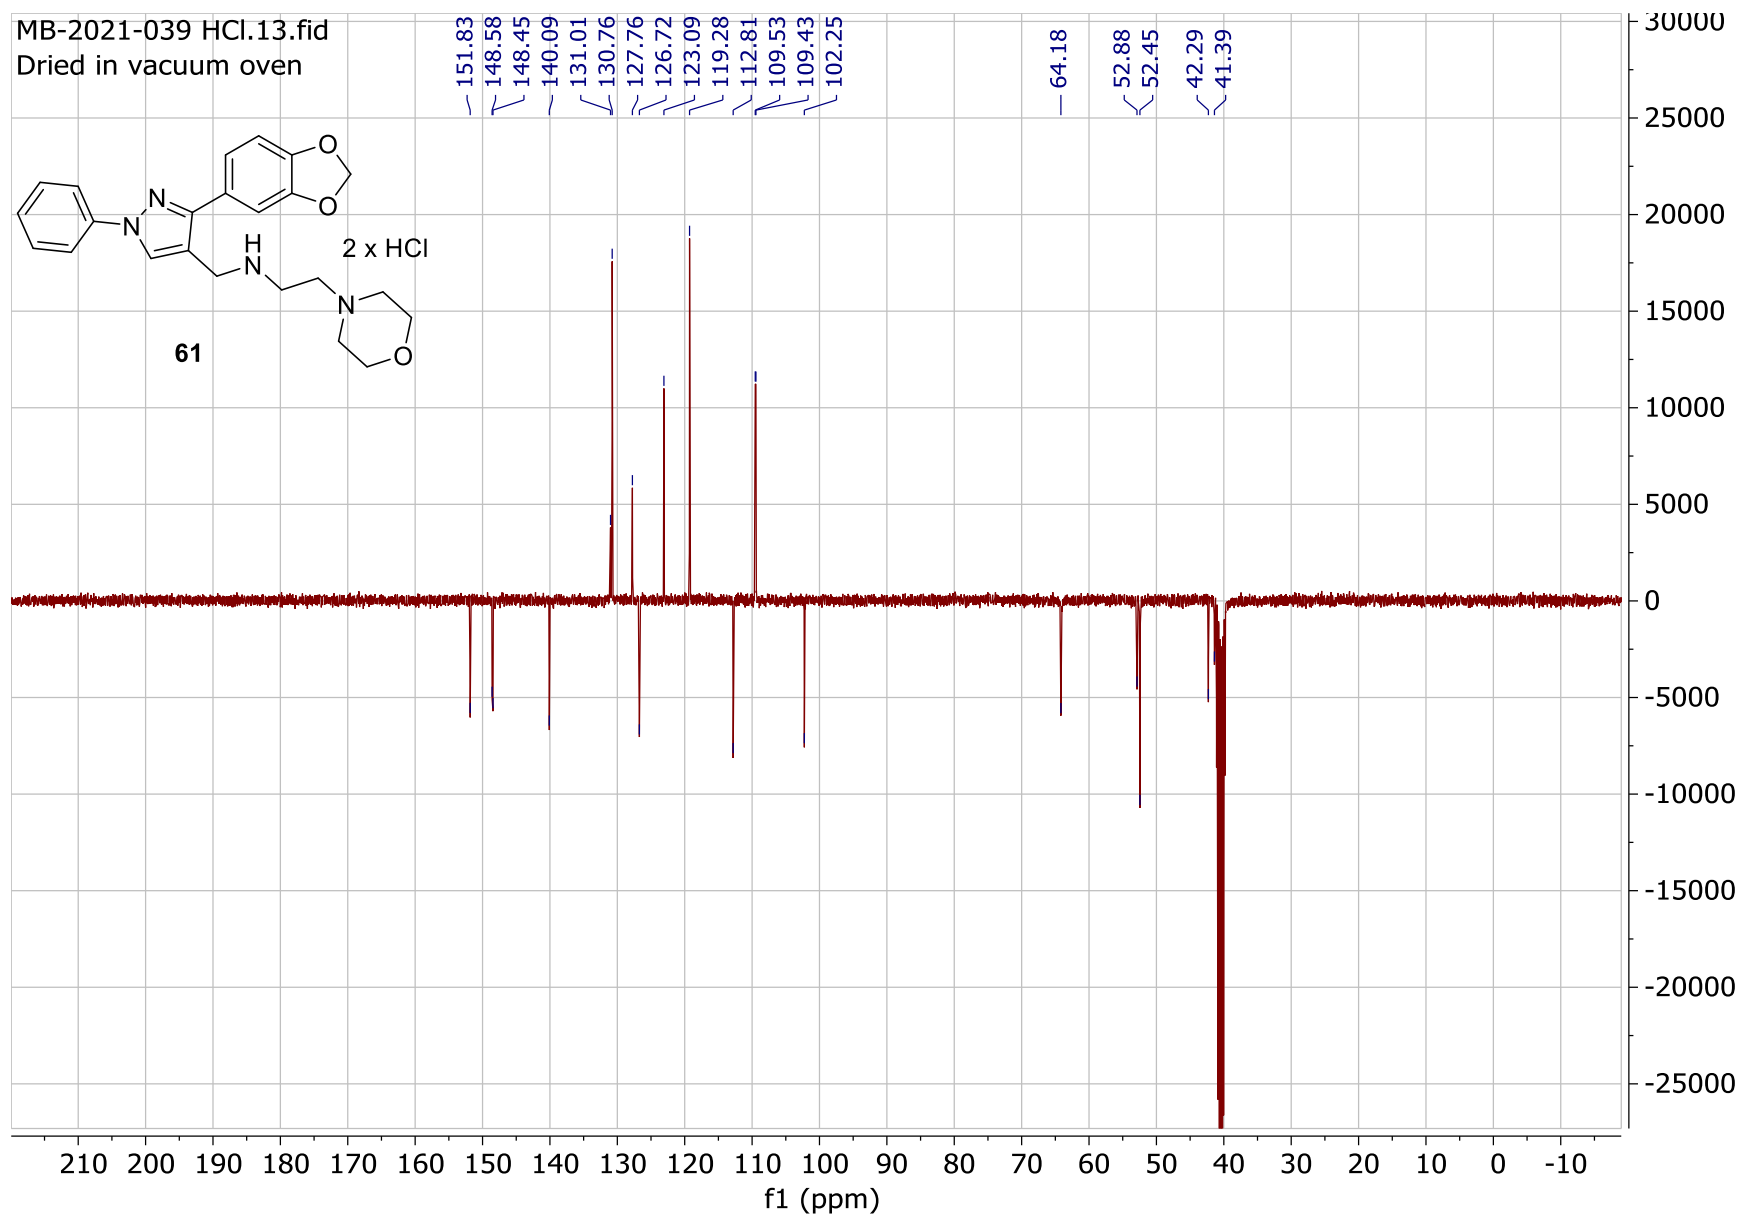

MB-2021-037HCl.10.fid

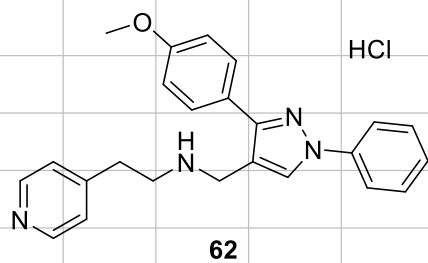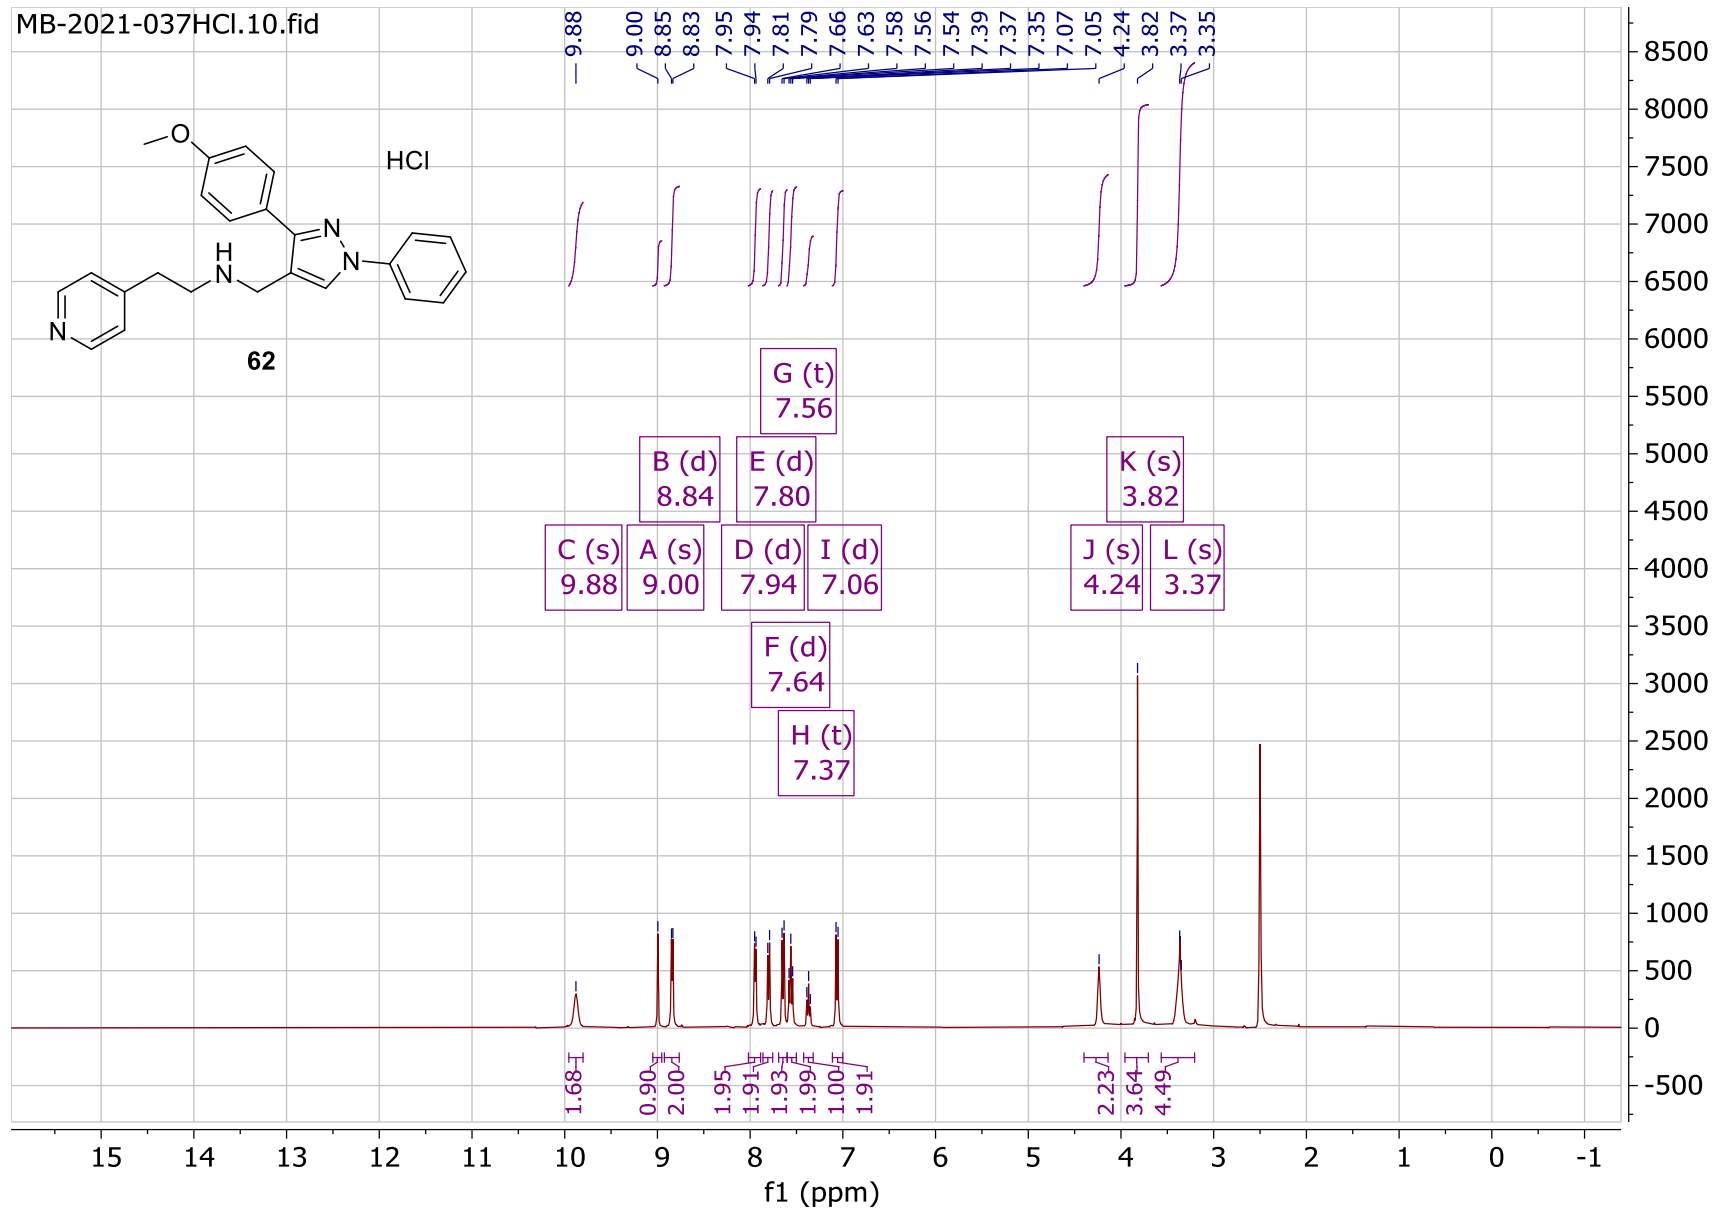



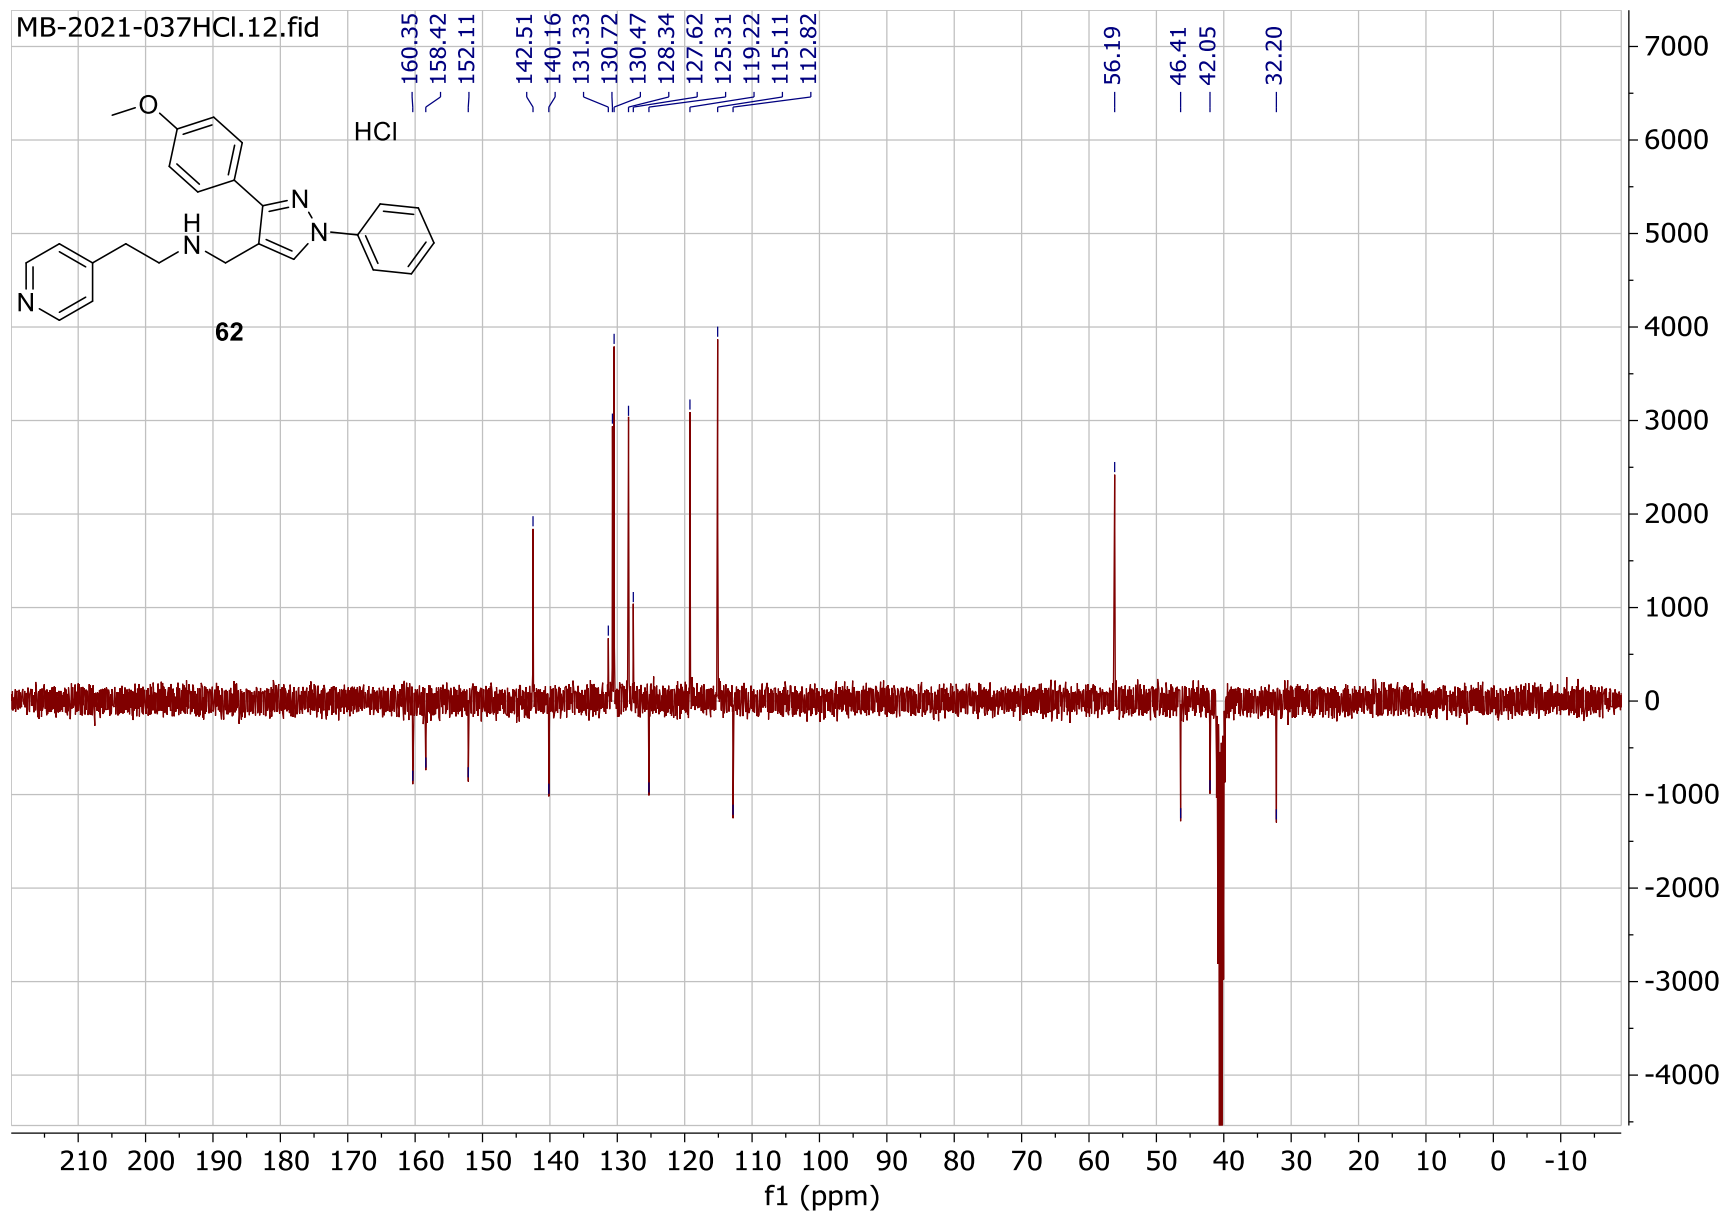

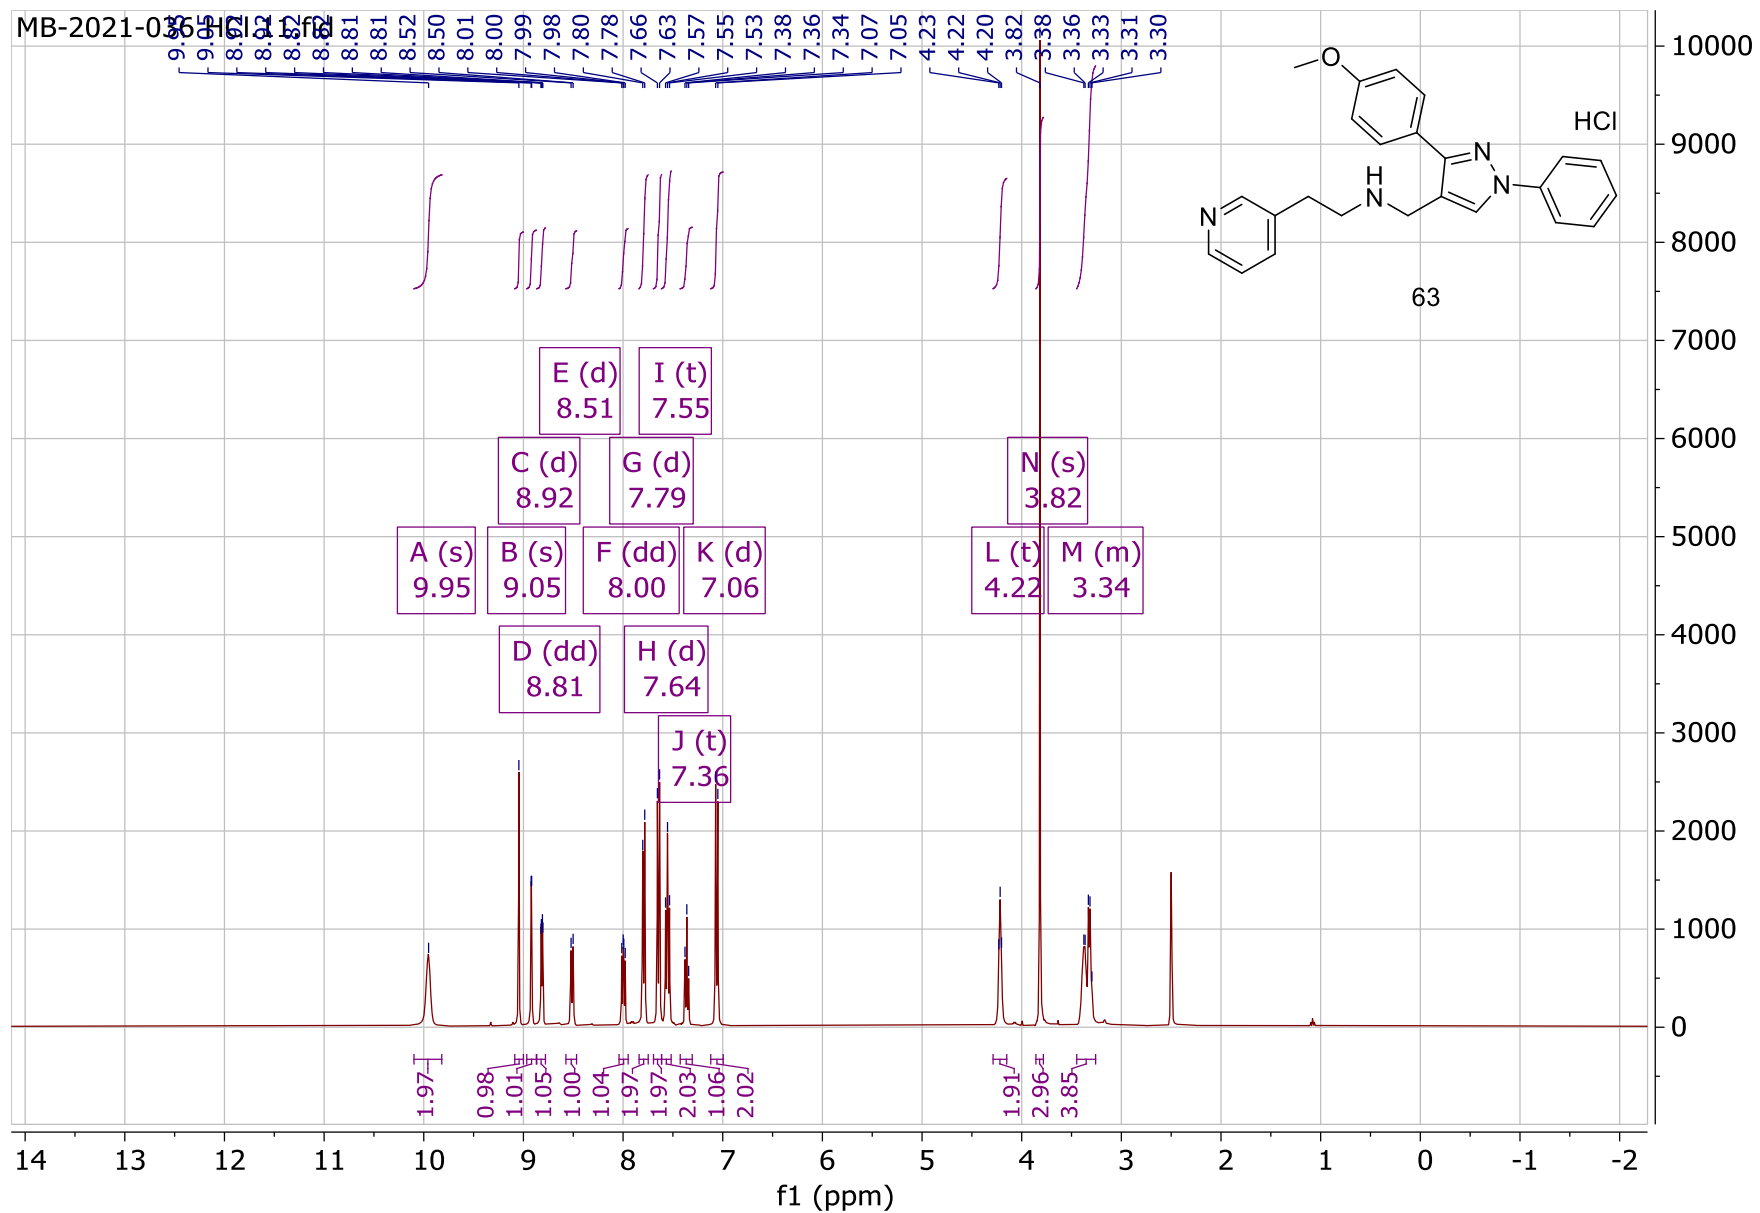

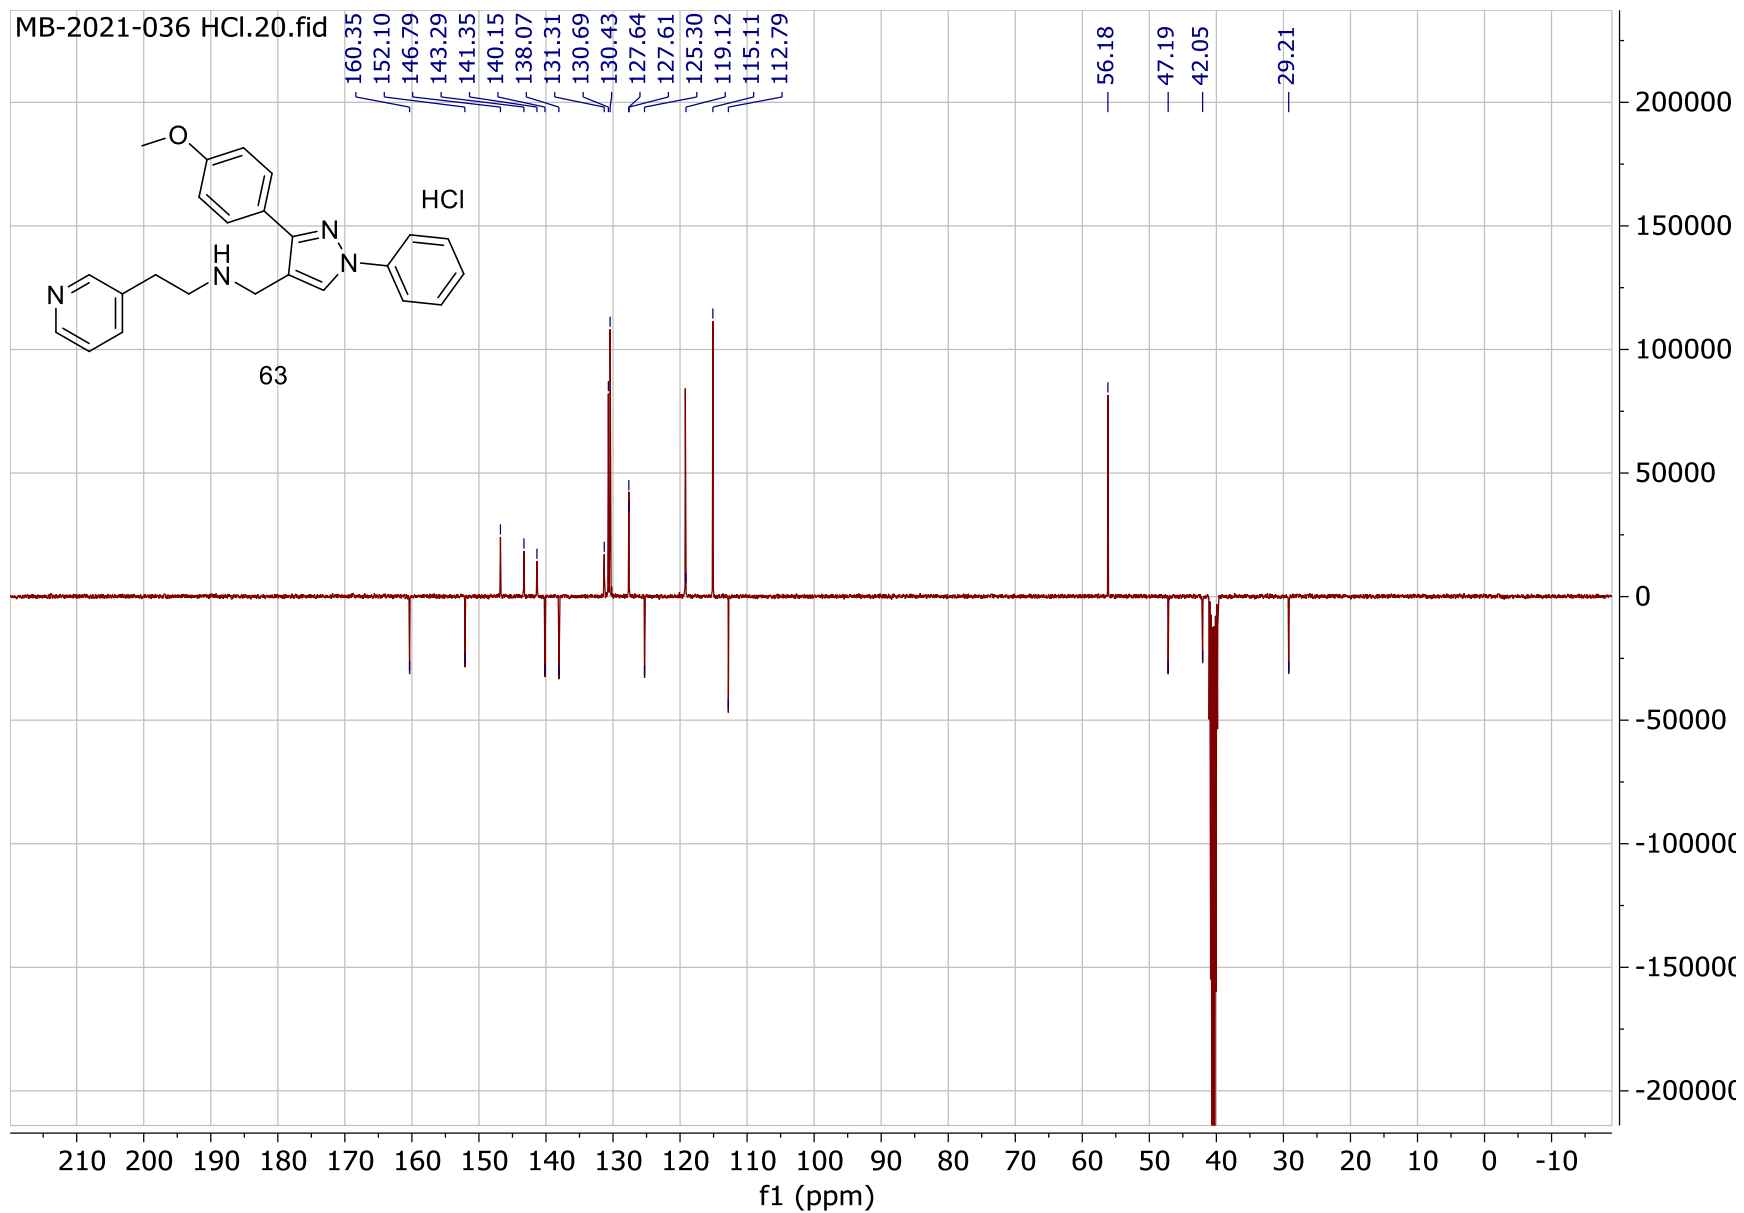

MB-2021-033 HCl.10.fid

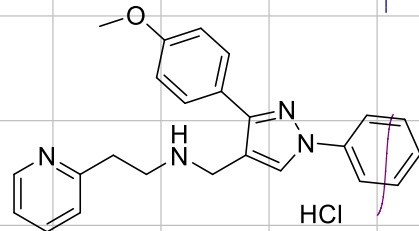

64

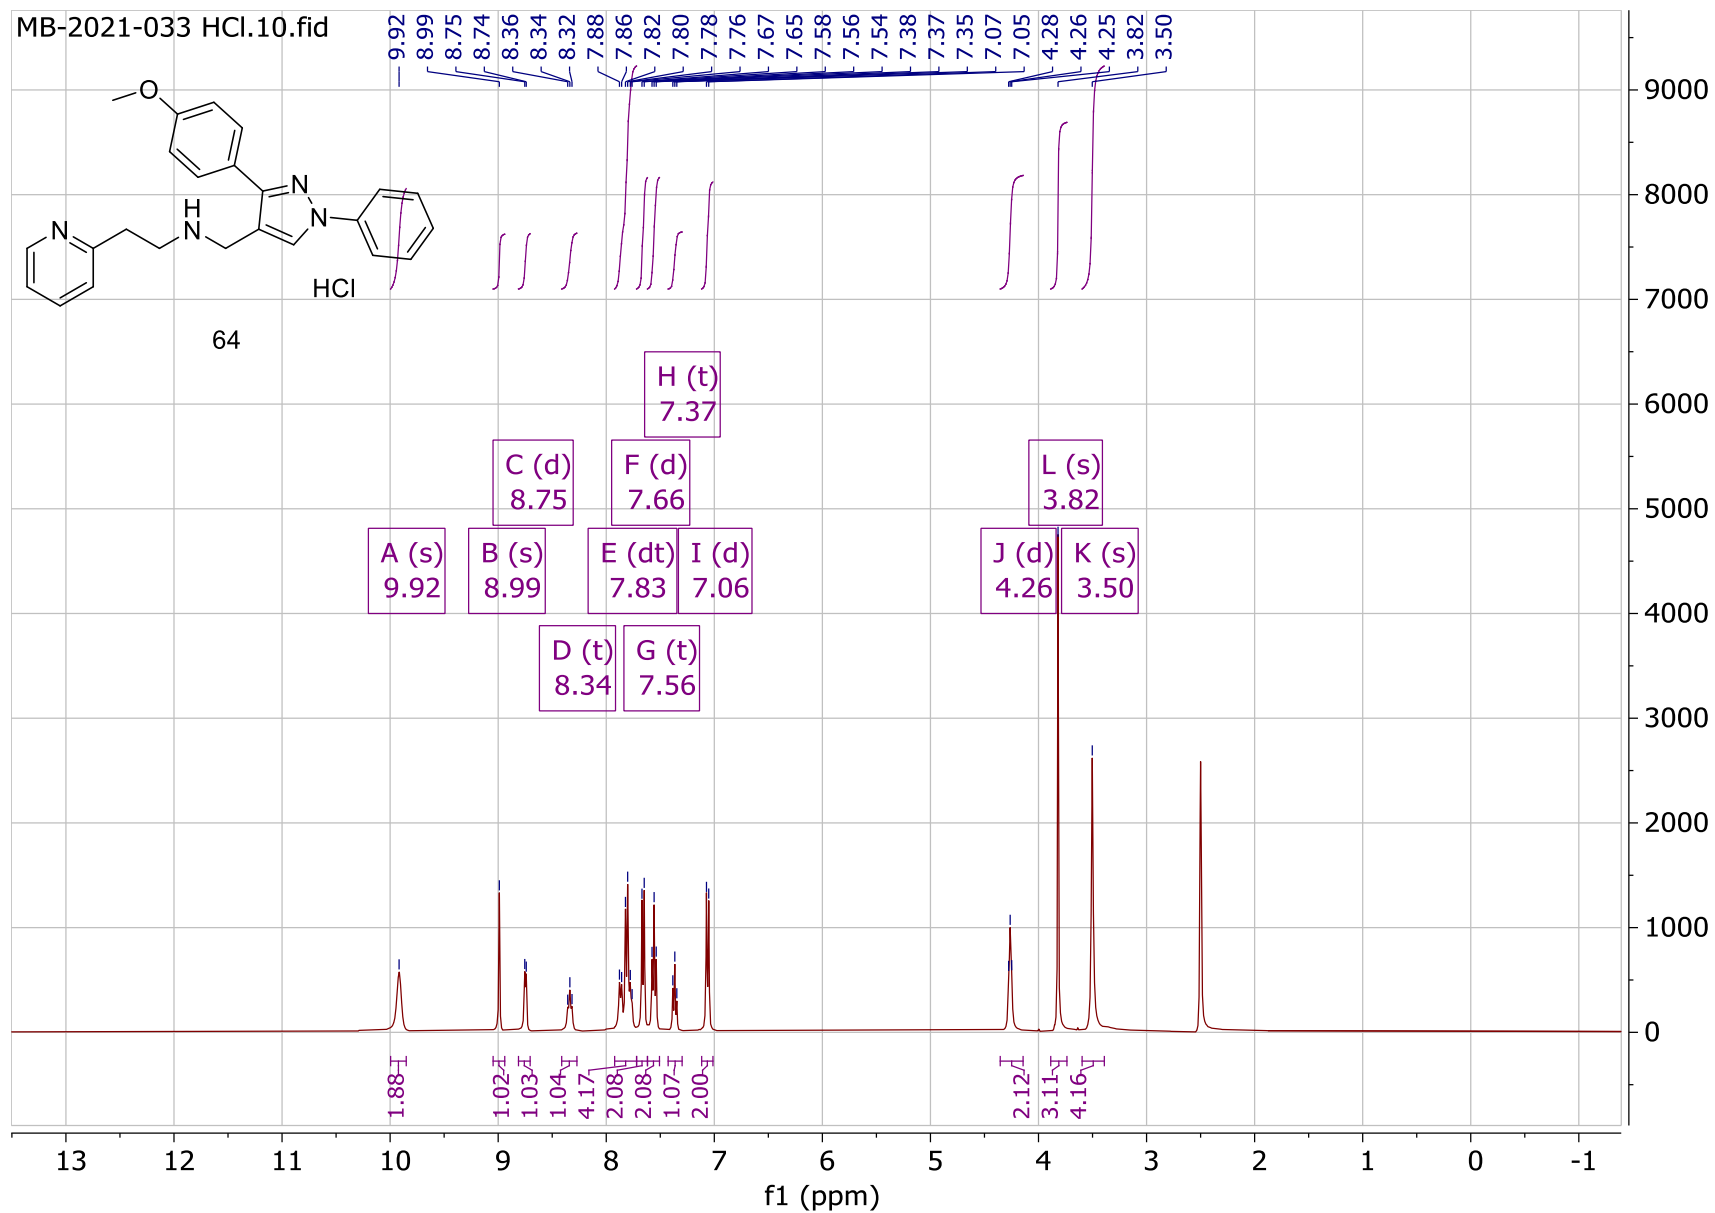

MB-2021-033 HCl.13.fid

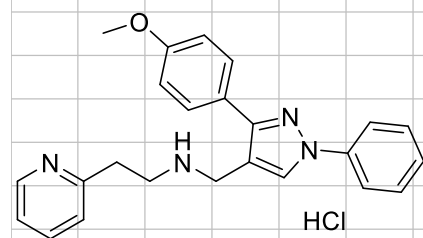

64

160.37  
154.37  
152.07  
144.58  
140.16  
131.27  
130.73  
130.42  
127.66  
127.45  
125.56  
125.29  
119.26  
115.13  
112.75

56.19

45.87

42.10

31.08

140000  
130000  
120000  
110000  
100000  
90000  
80000  
70000  
60000  
50000  
40000  
30000  
20000  
10000  
0  
-10000  
-20000  
-30000  
-40000  
-50000  
-60000  
-70000  
-80000  
-90000  
-100000

210 200 190 180 170 160 150 140 130 120 110 100 90 80 70 60 50 40 30 20 10 0 -10

f1 (ppm)

MB-2021-30 oxalate.10.fid

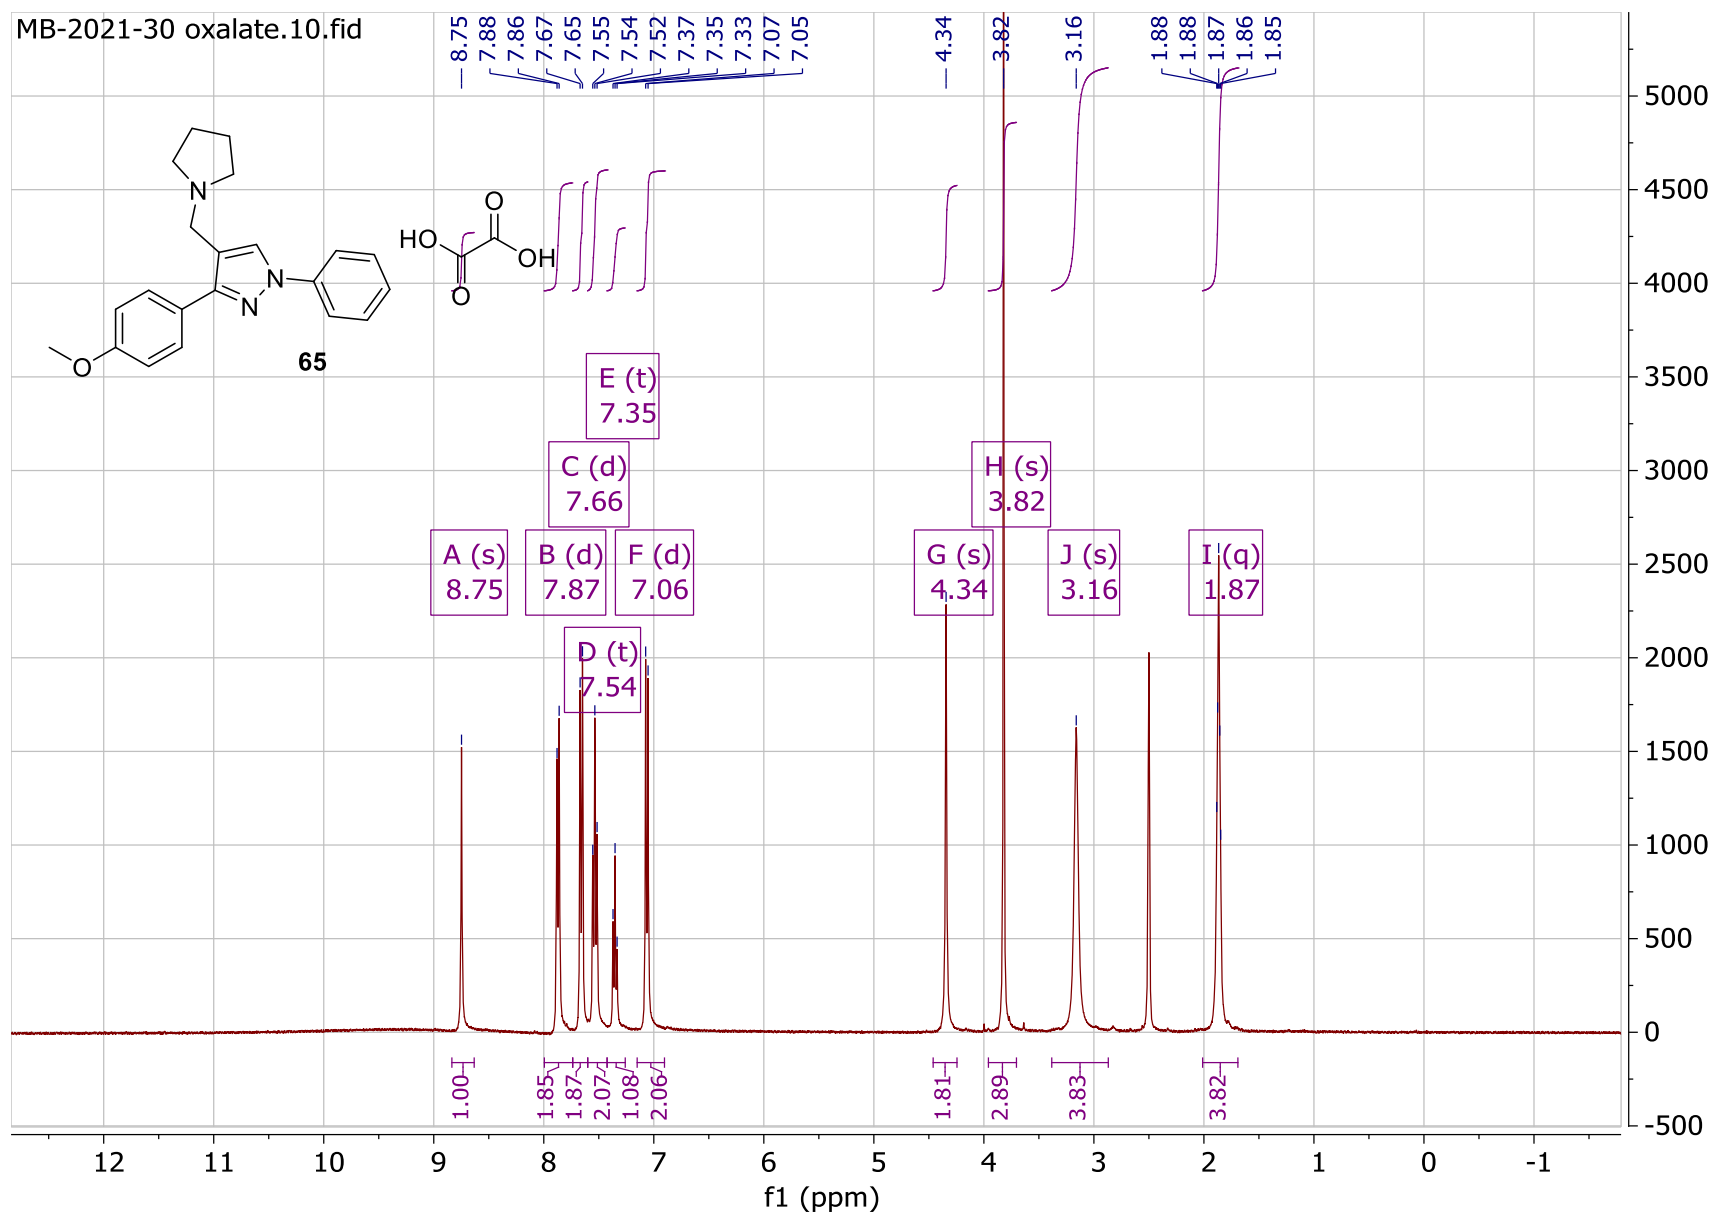

MB-2021-30 oxalate.13.fid

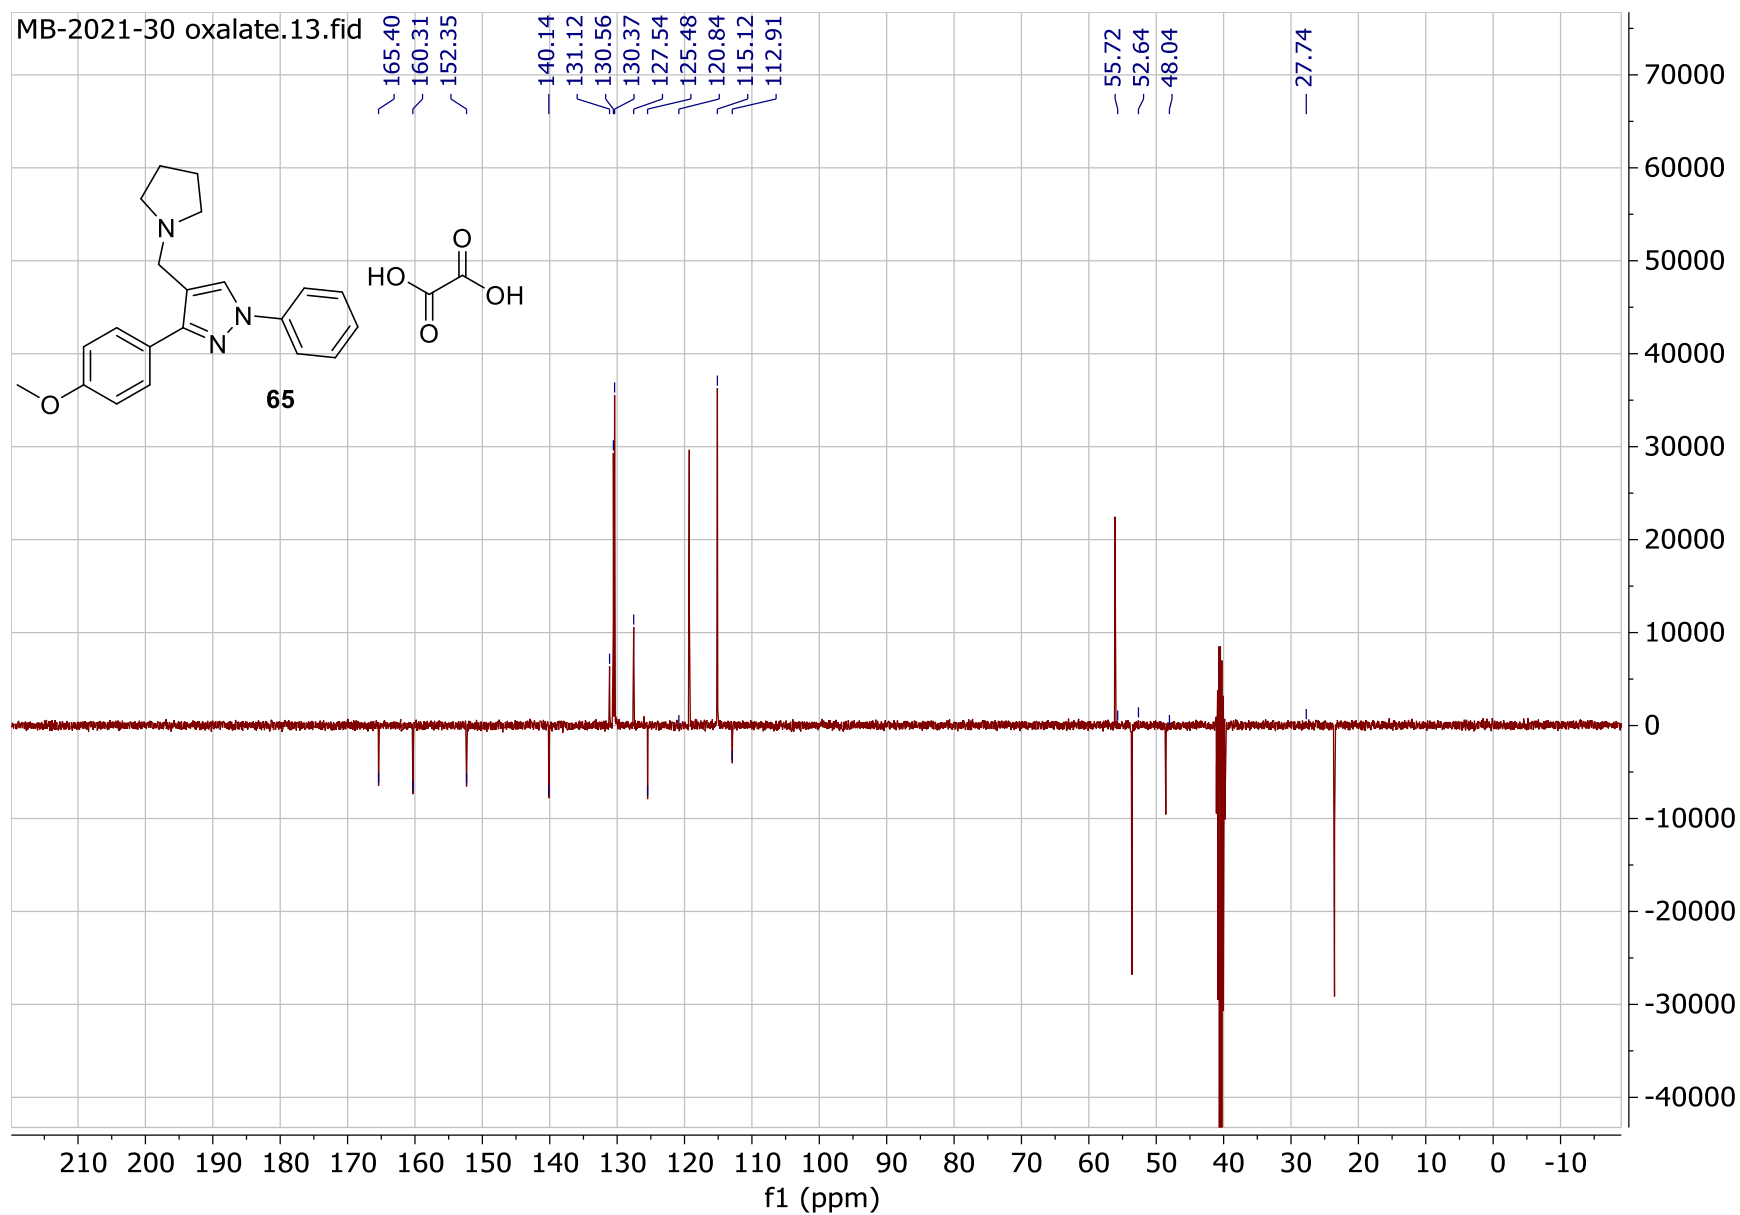

MB-2021-038 HCl 10.fid

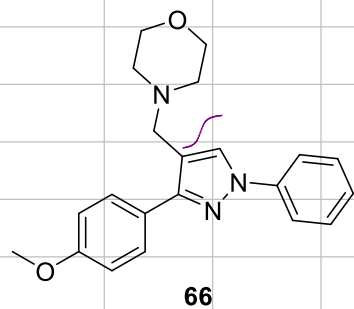

HCl

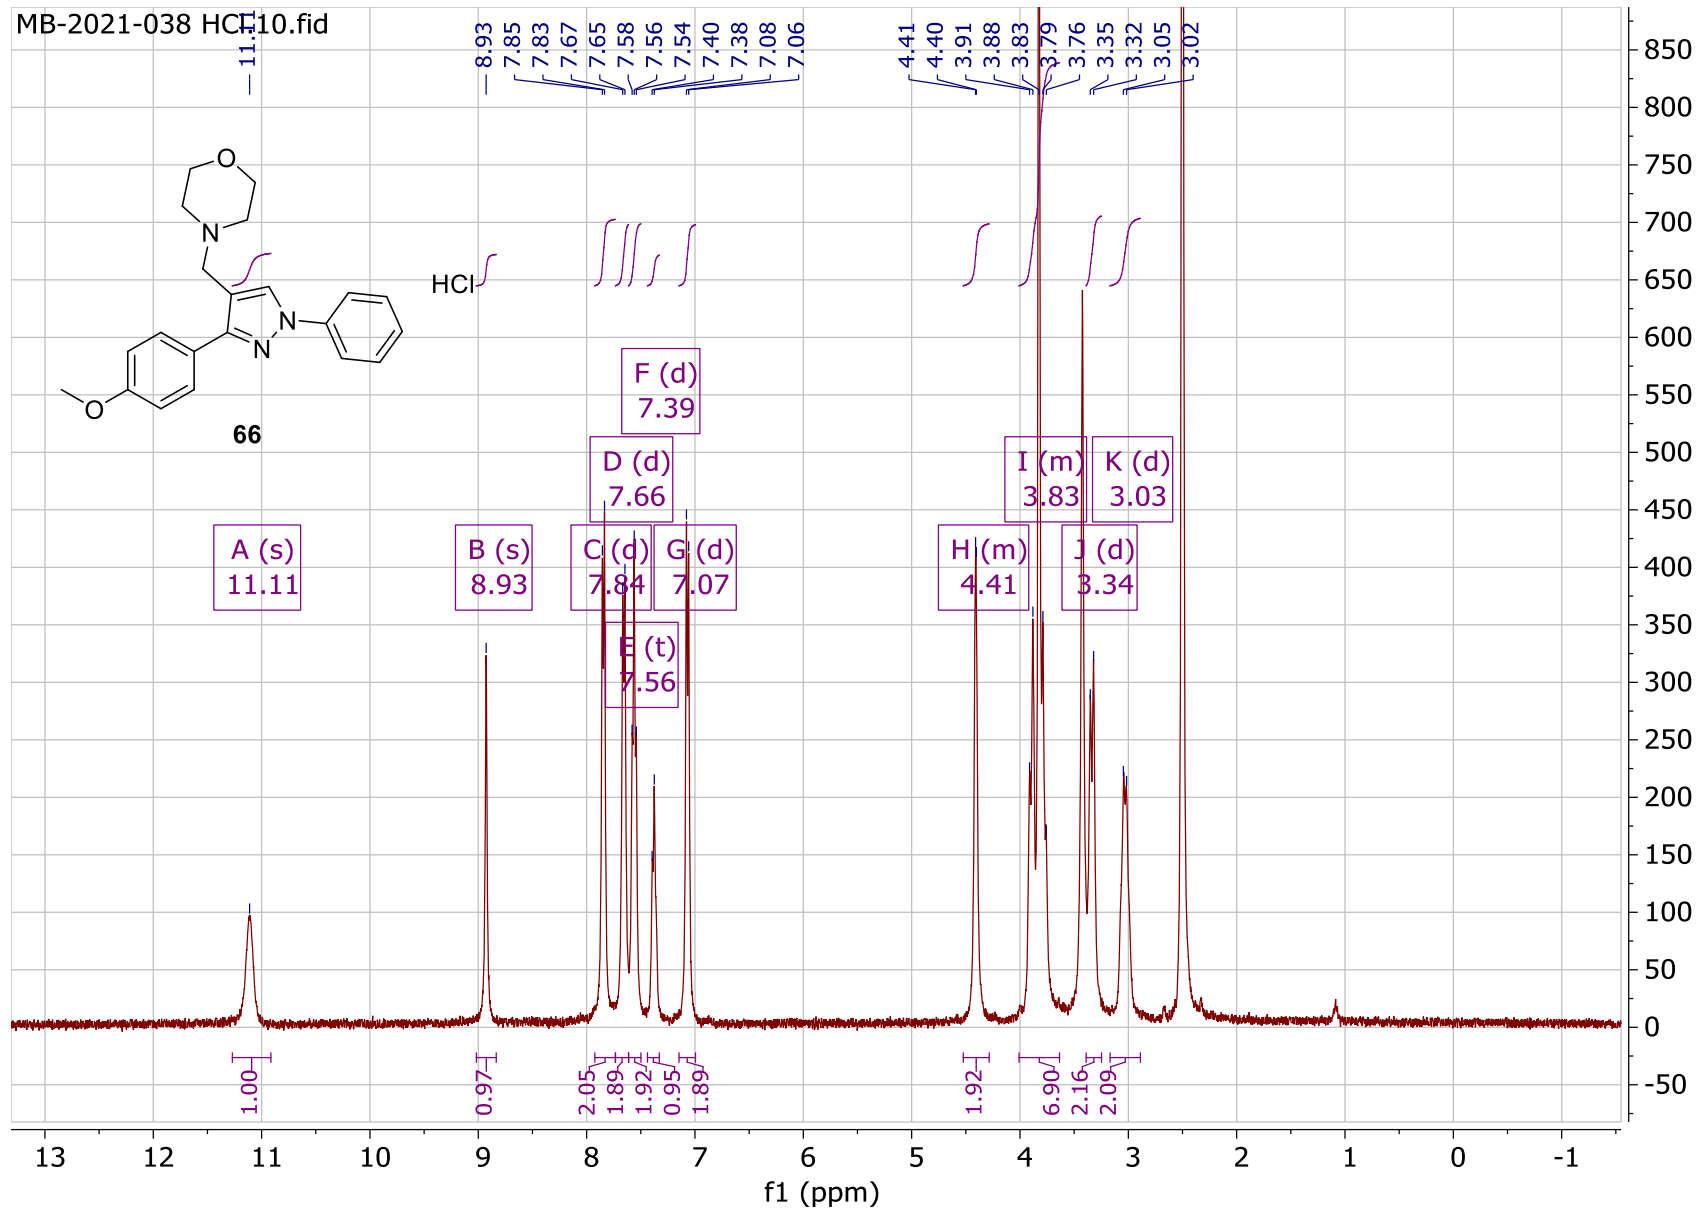



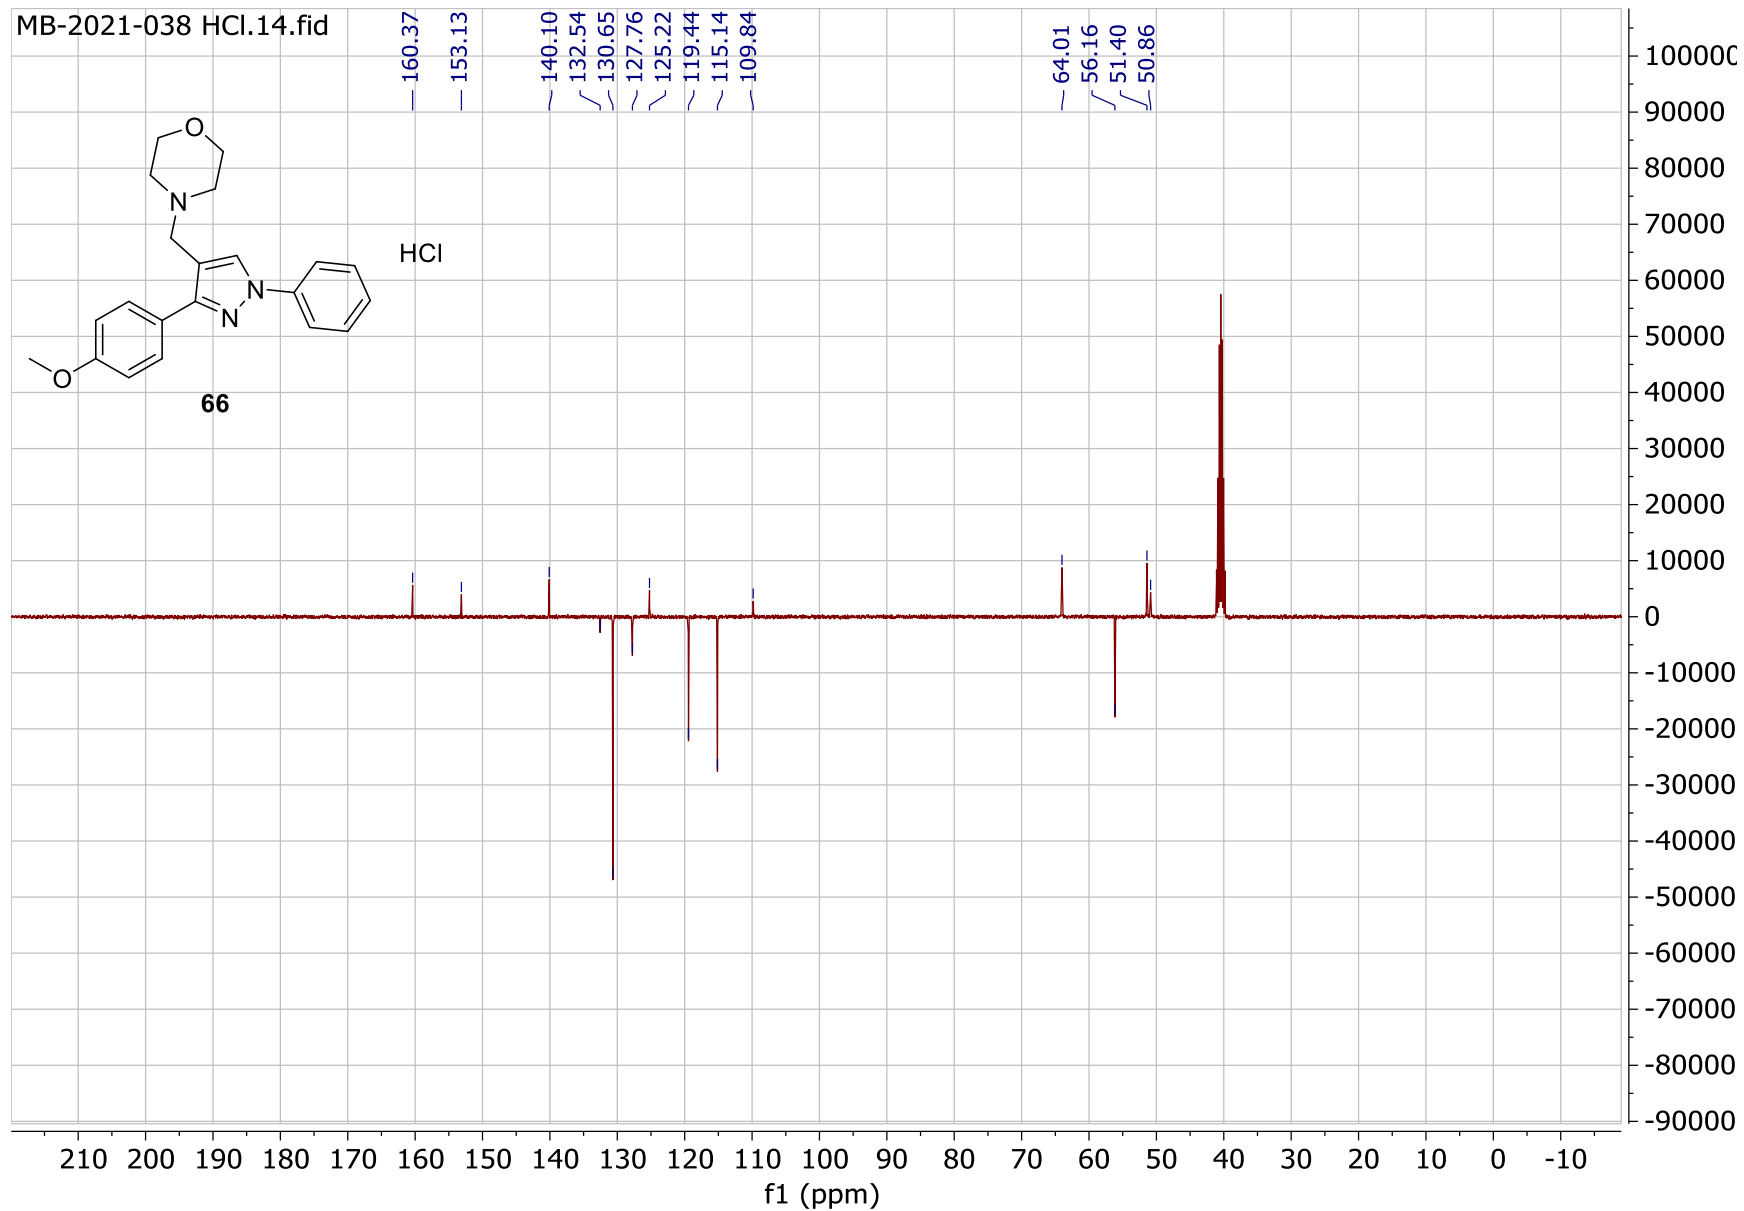

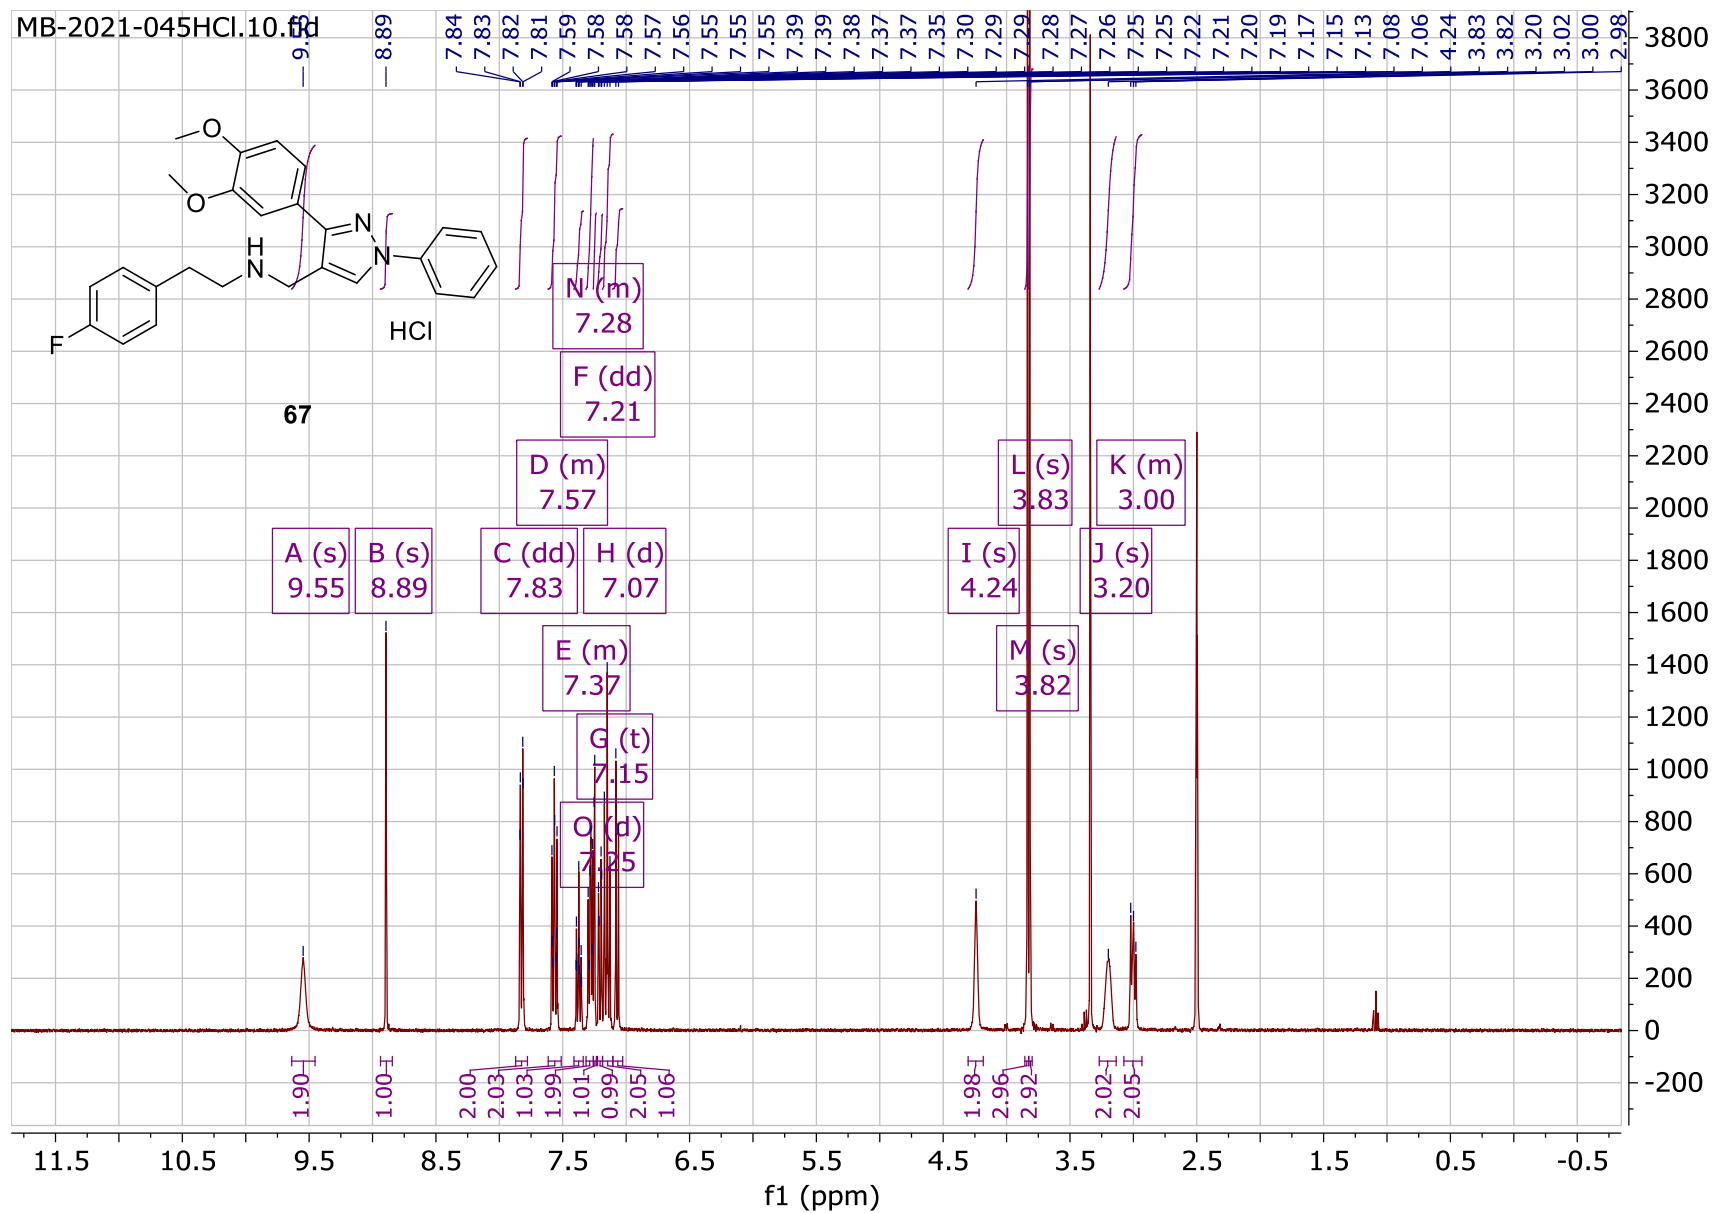

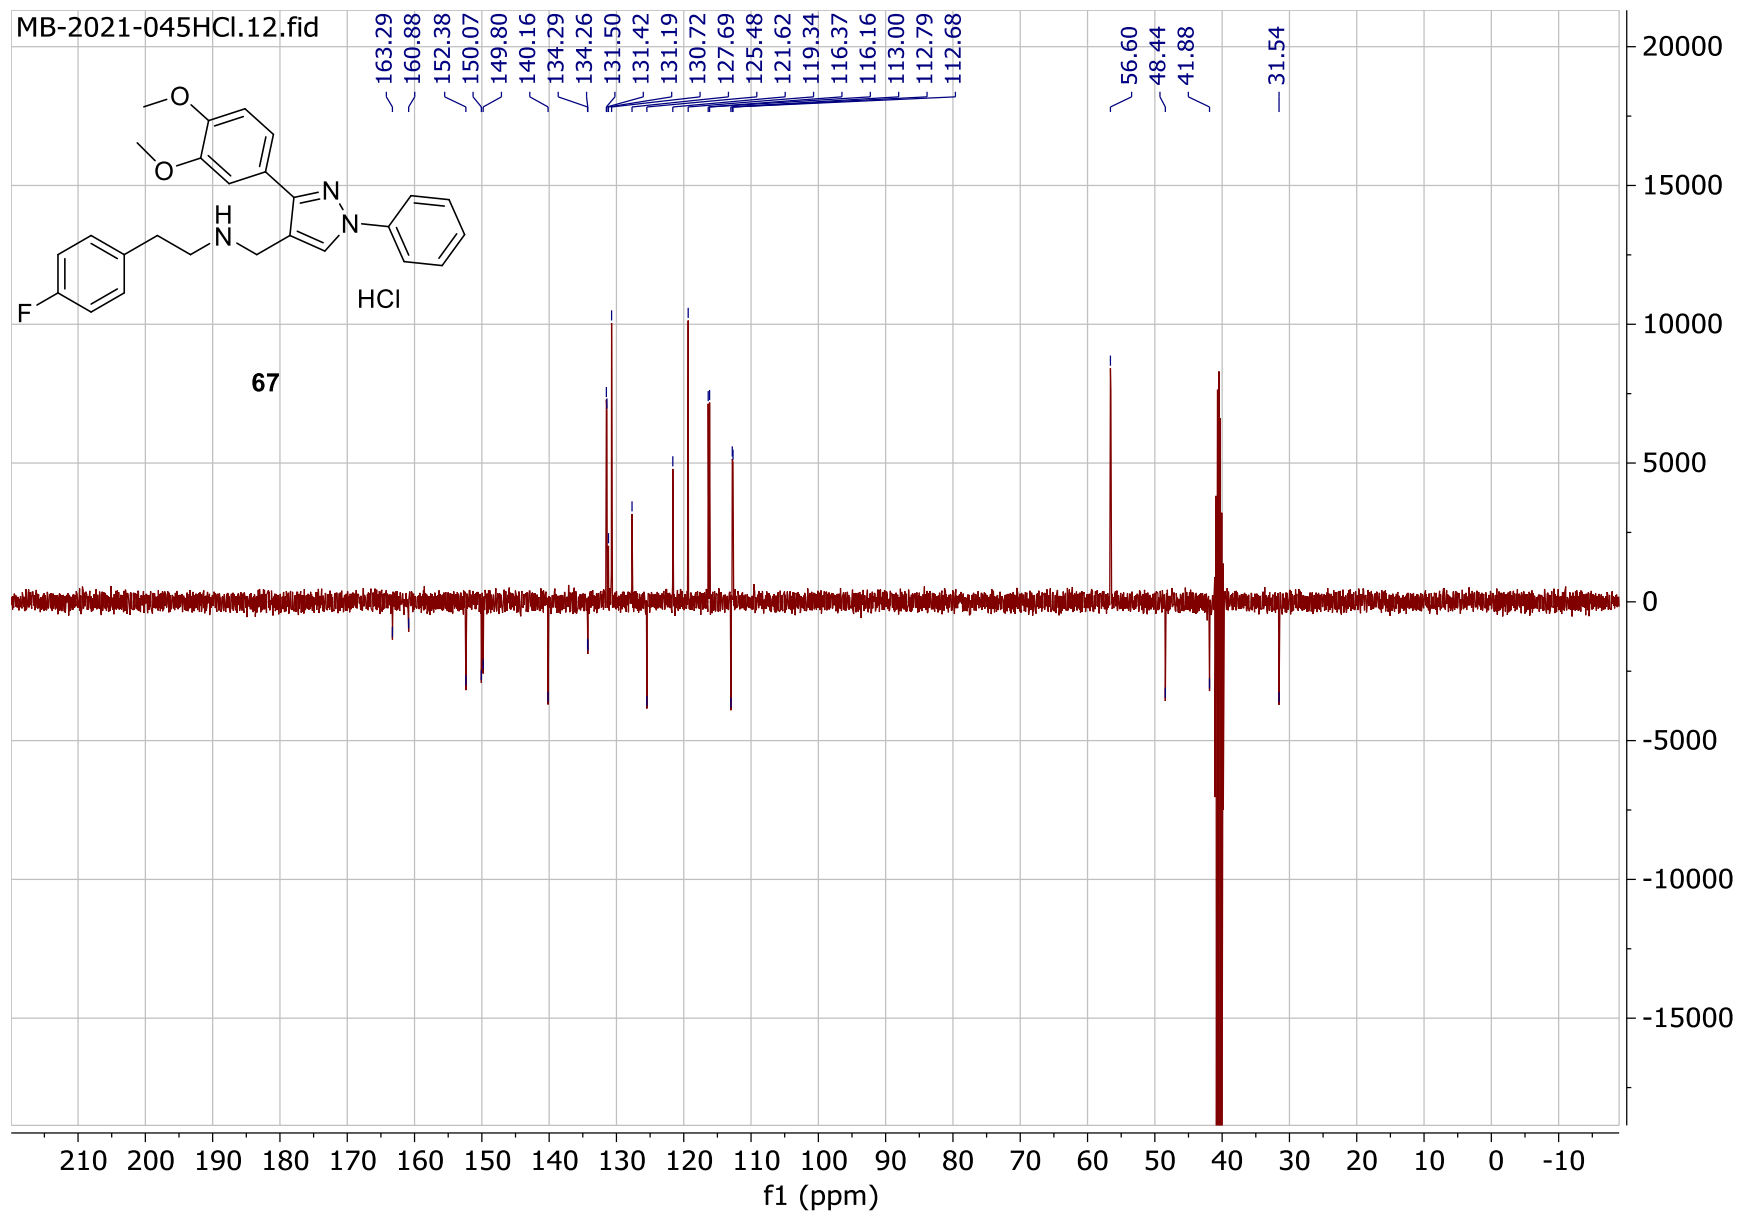

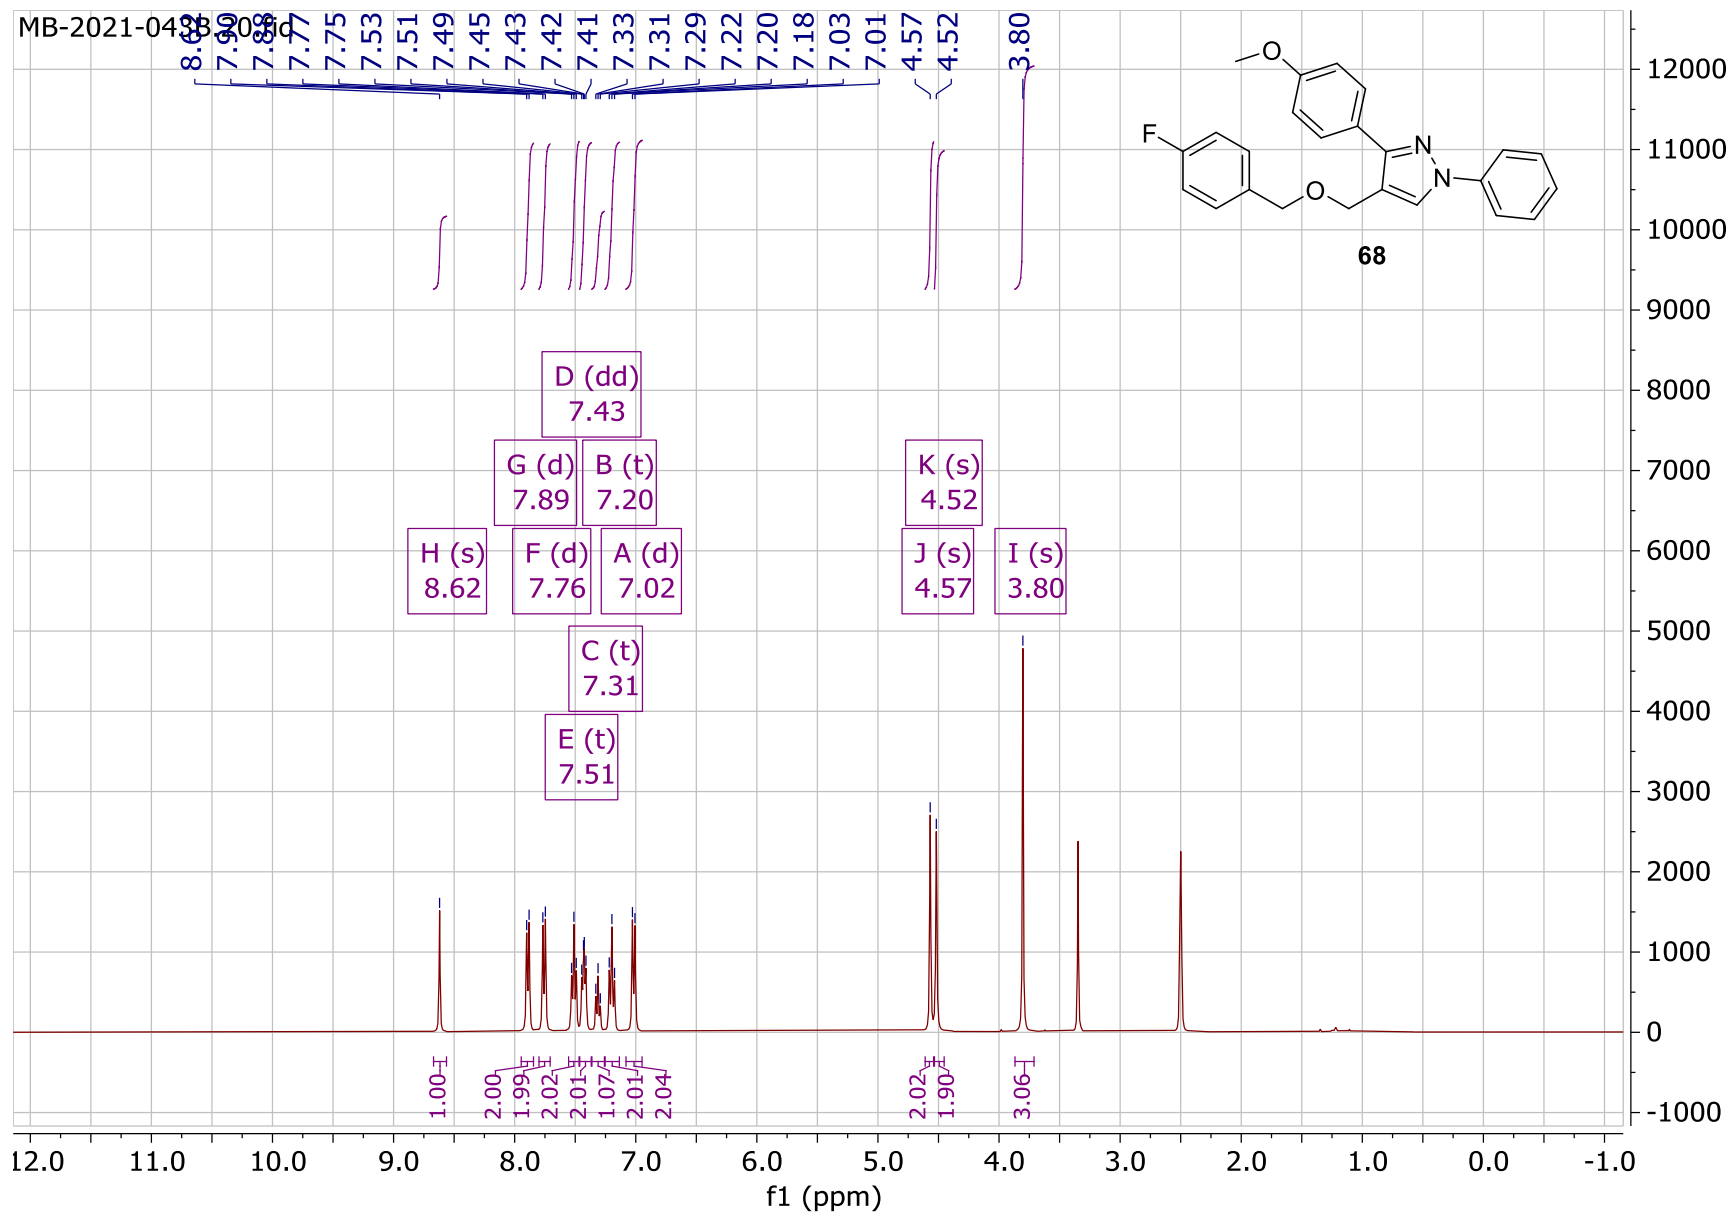

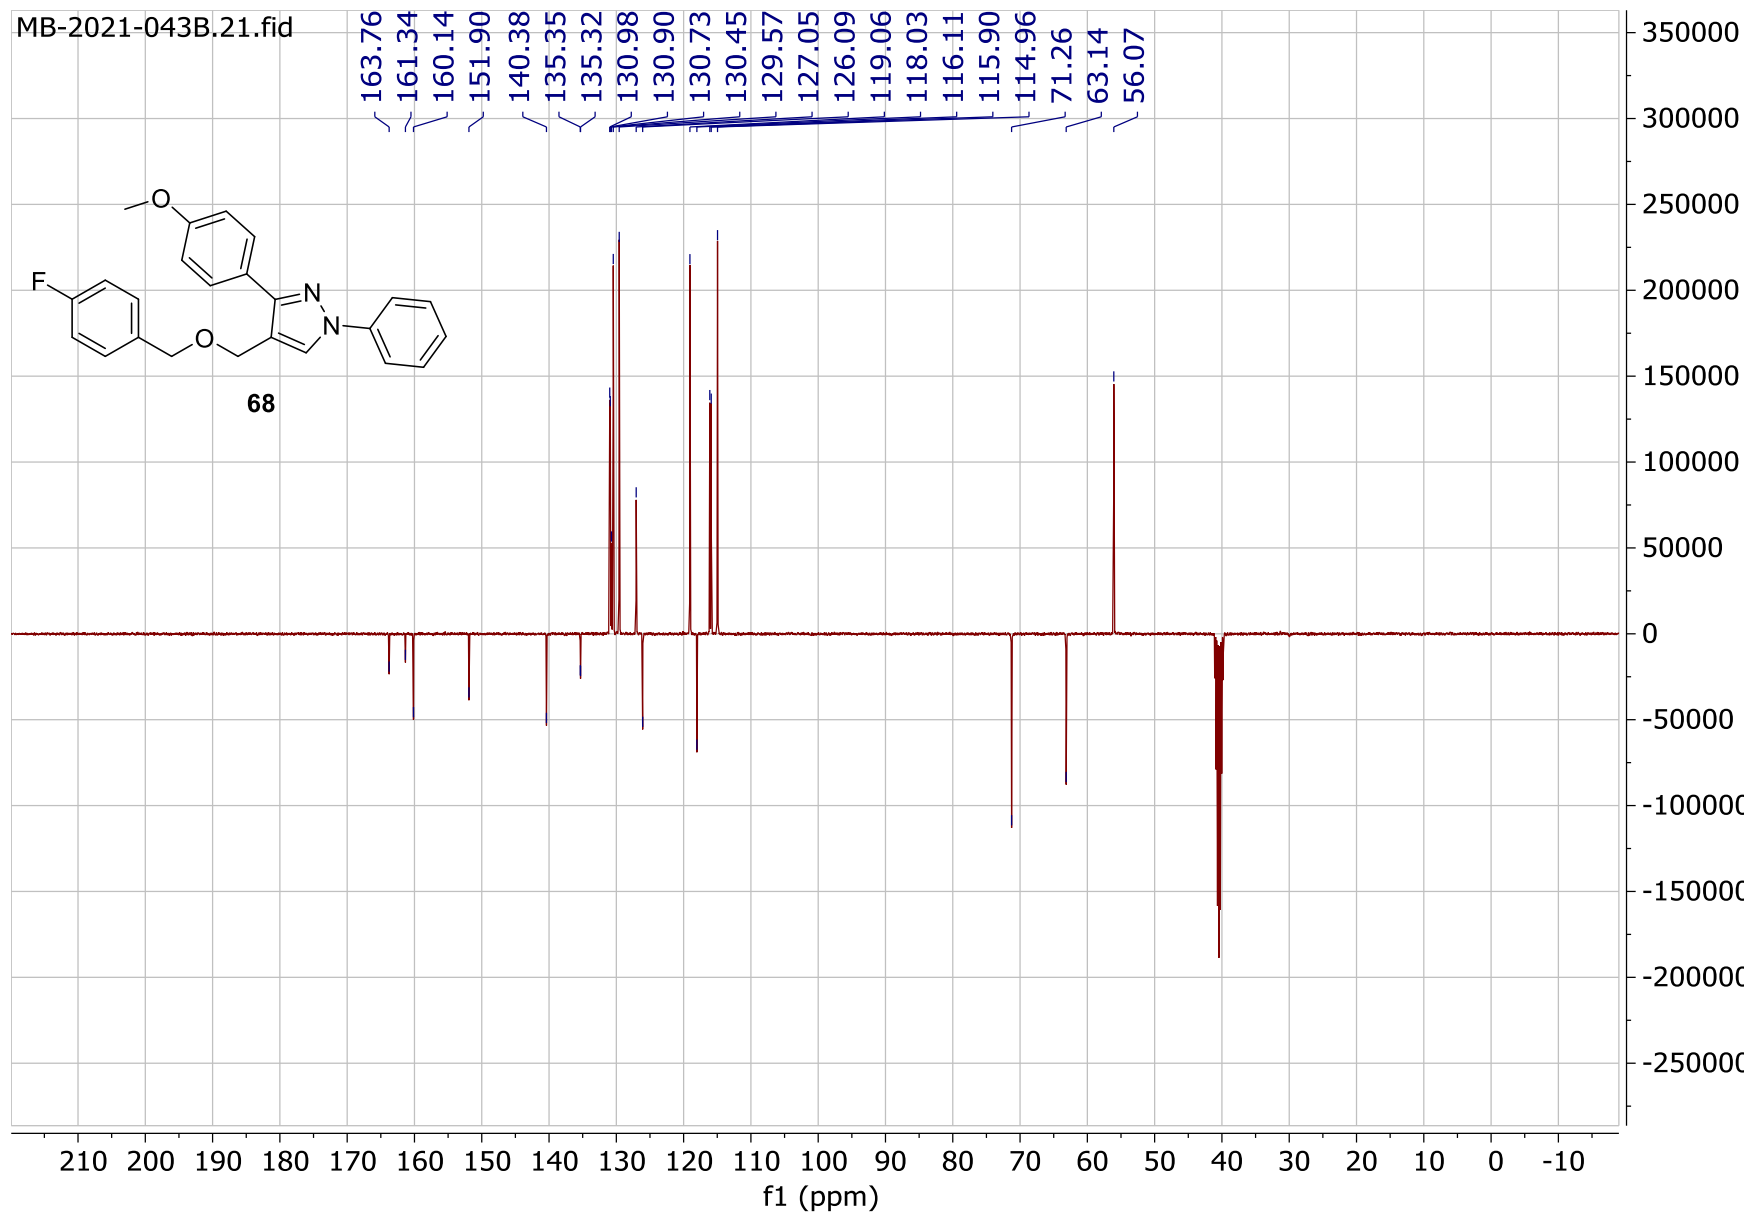

MB-2021-060E D2O.23.fid

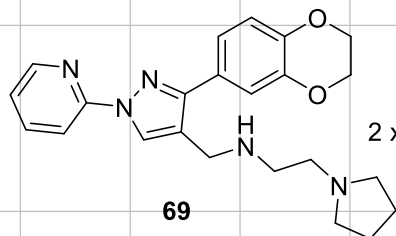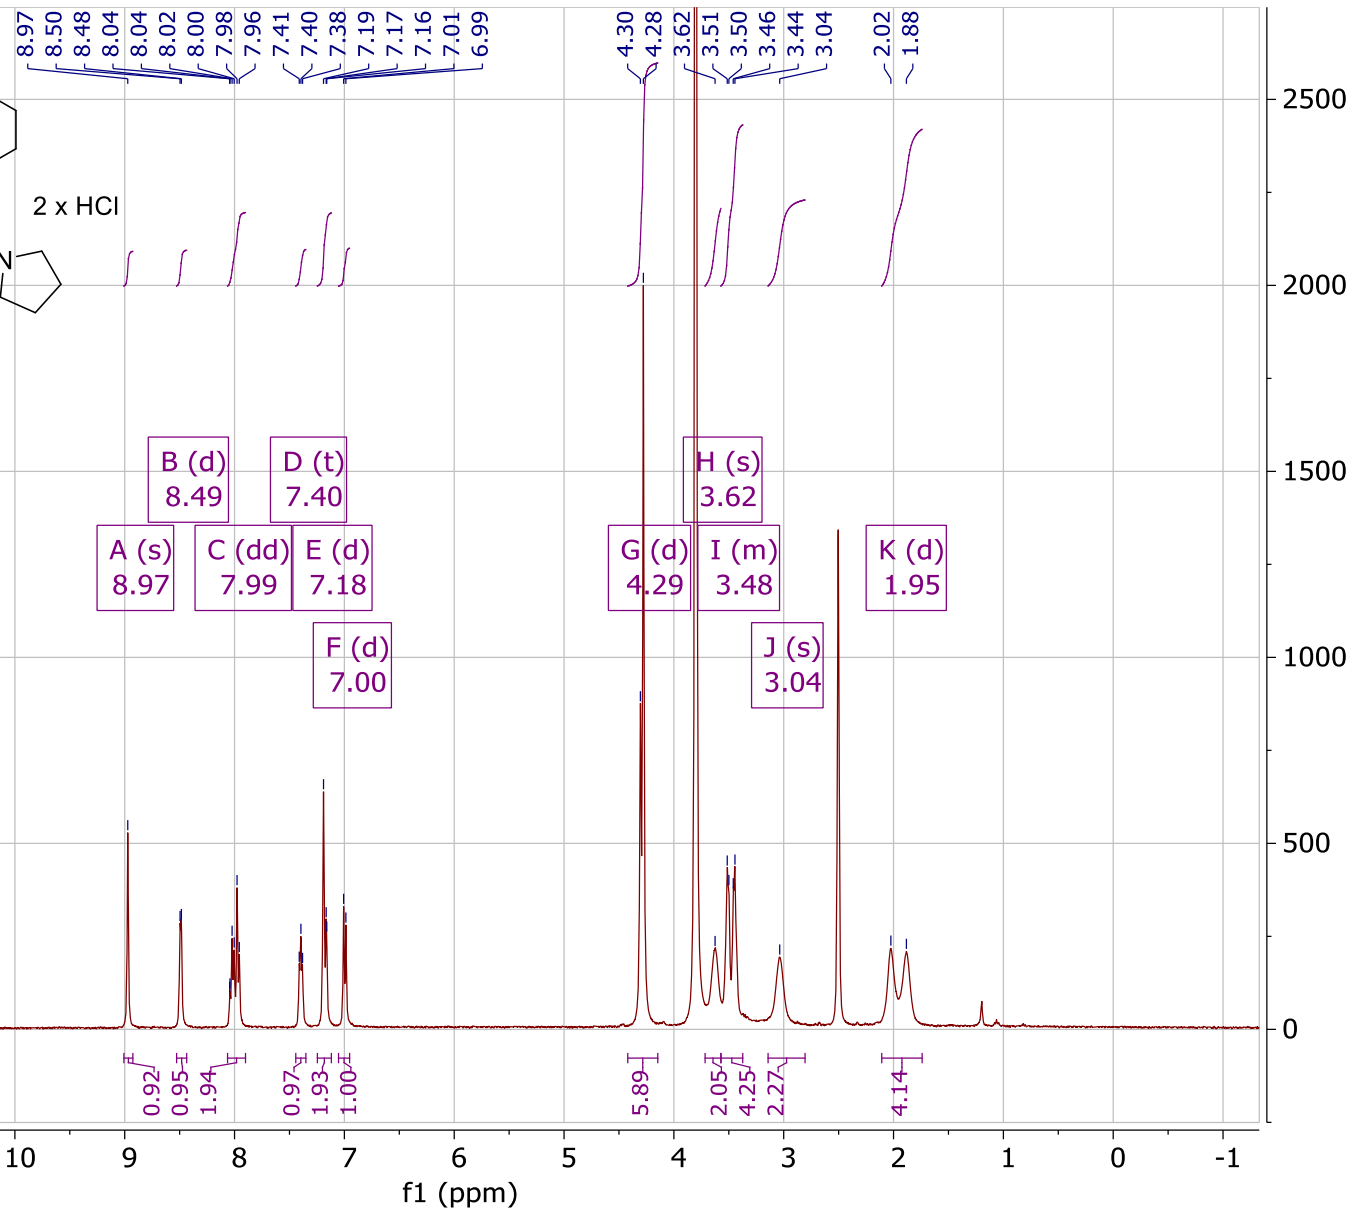

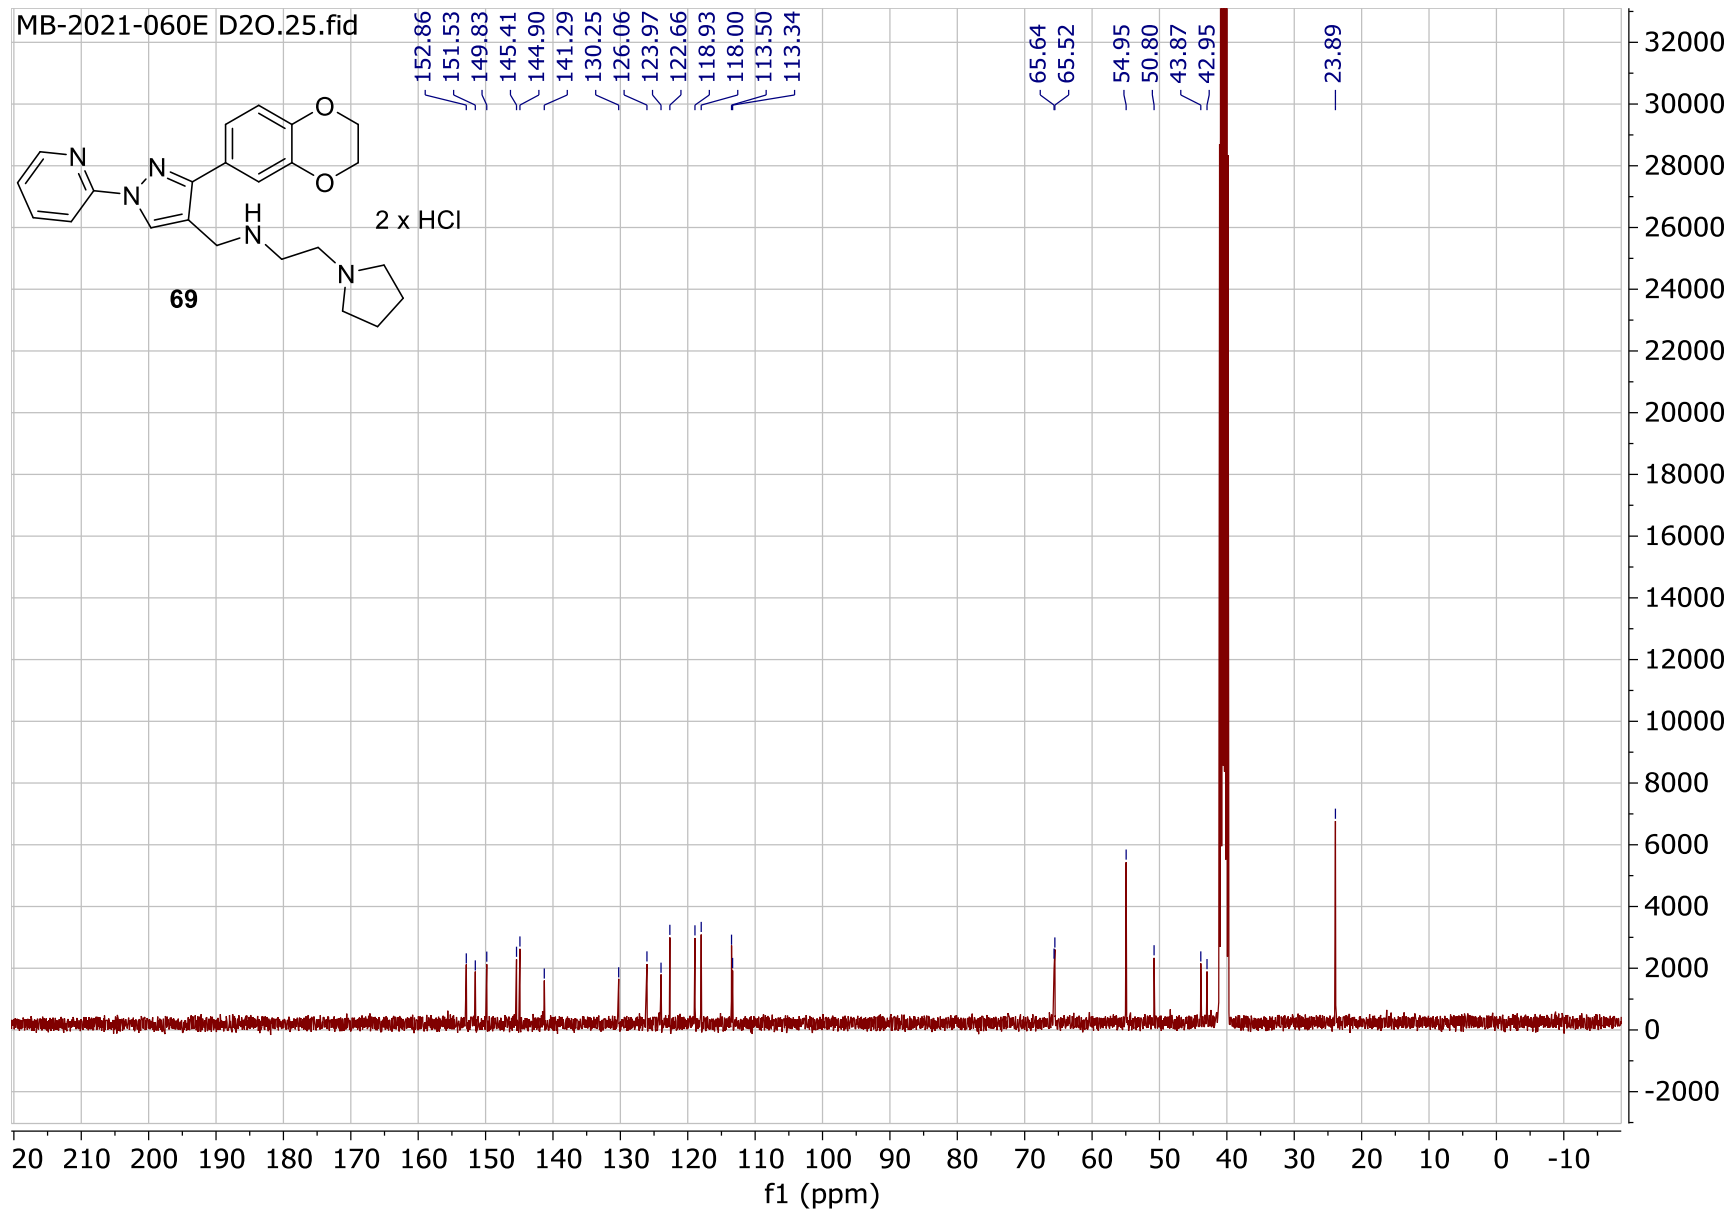

2. UPLC and HRMS spectra of the studied samples

2.1 *N*-((3-(2,3-dihydrobenzo[*b*][1,4]dioxin-6-yl)-1-phenyl-1*H*-pyrazol-4-yl)methyl)aniline (13)

3: UV Detector: TIC

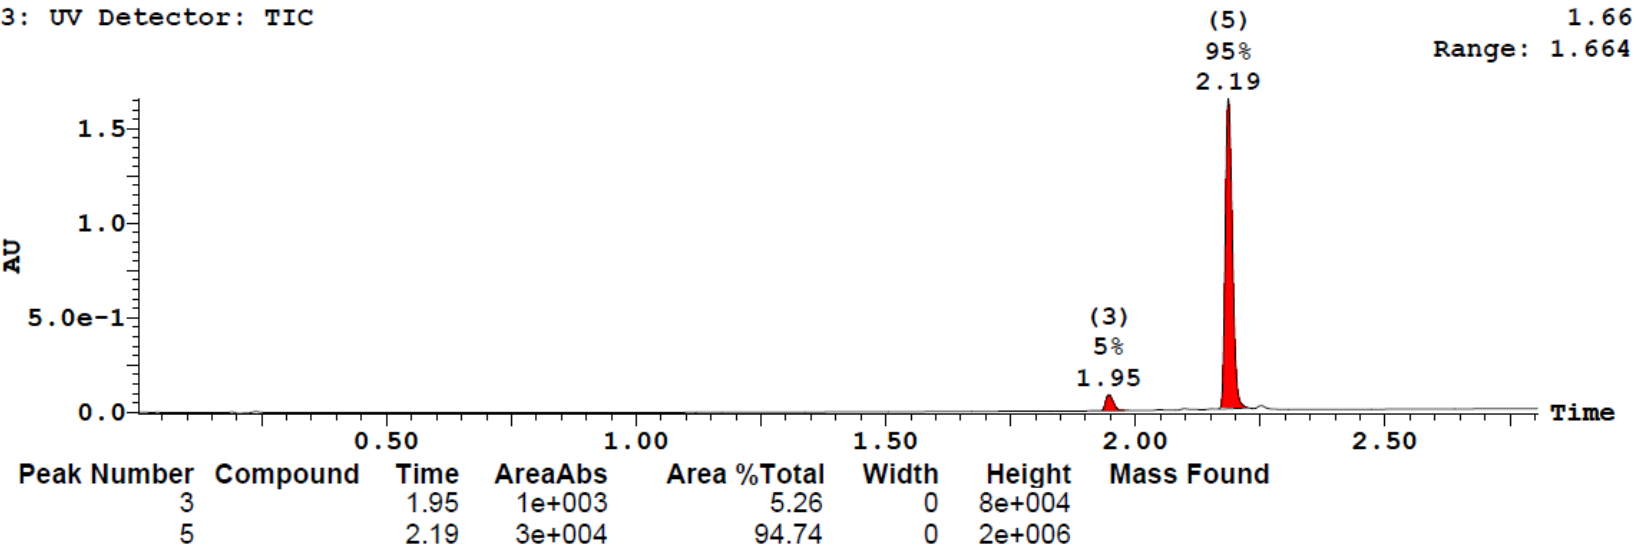

5: (Time: 2.19) Combine (871:879-(860:864+896:900))

1:MS ES+  
6.0e+006

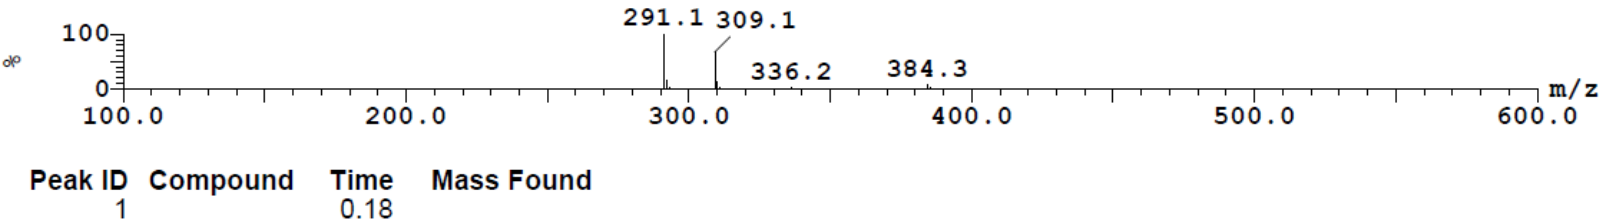



13UAMC5403

medchem\_140324\_M1 1048 (9.127) Cm (1043:1054-1004:1015)

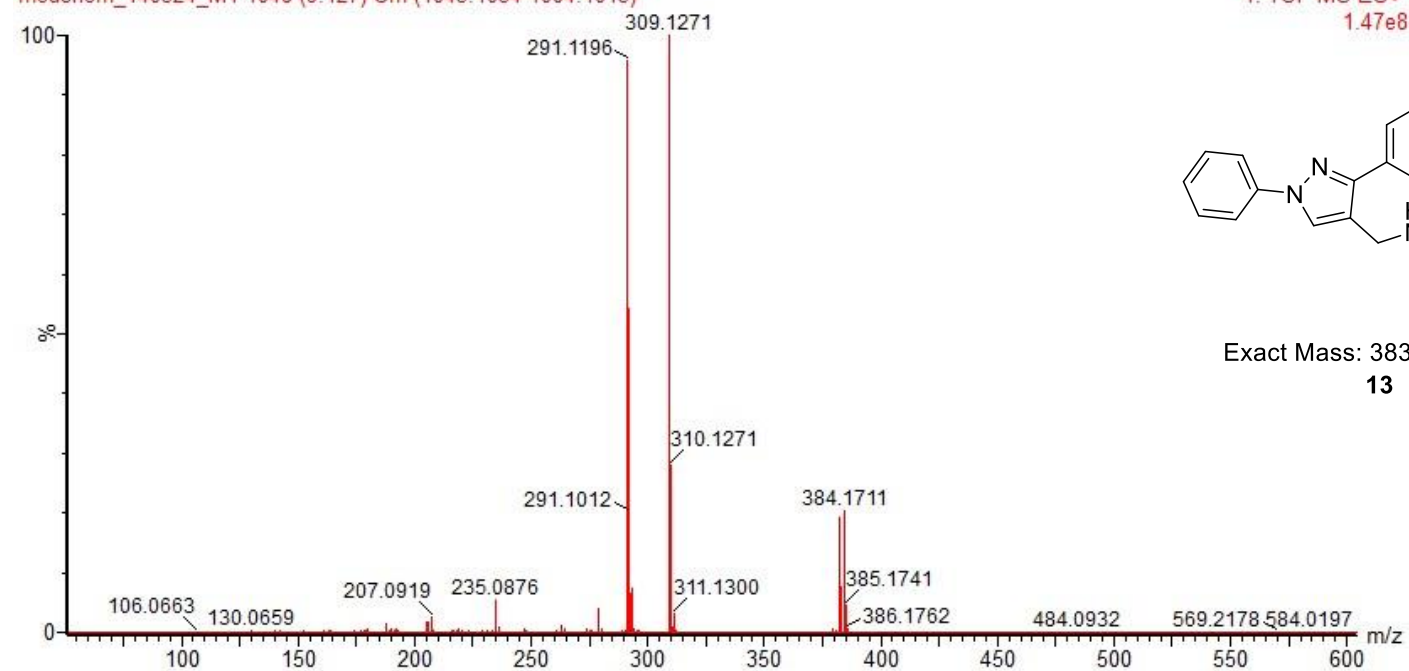

1: TOF MS ES+  
1.47e8

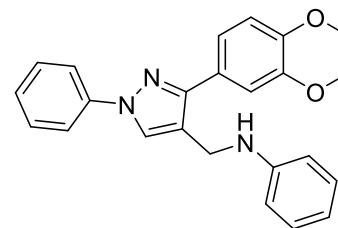

Exact Mass: 383,1634  
**13**

2.2 N-((3-(2,3-dihydrobenzo[b][1,4]dioxin-6-yl)-1-phenyl-1H-pyrazol-4-yl)methyl)-4-fluoroaniline (14)

Sample 1 Vial 1:57 ID UAMC-5435 File UAMC-5435 Date 13-Apr-2023 Time 17:49:49 Description

1: MS ES+ :BPI Smooth (SG, 2x2)

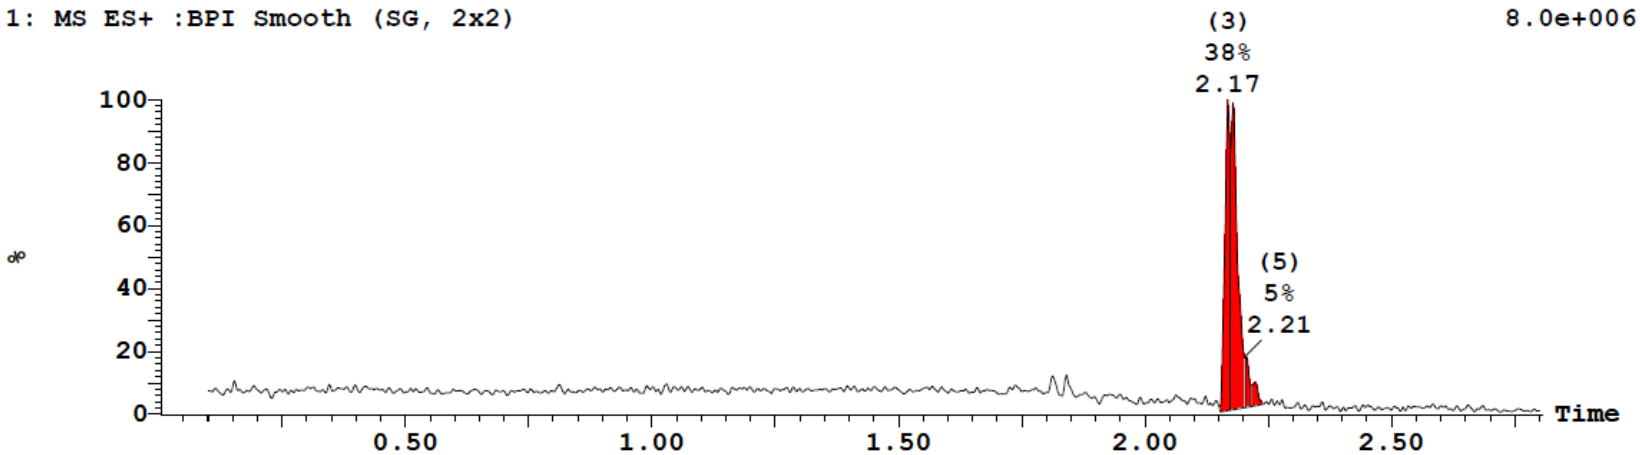

3: UV Detector: TIC

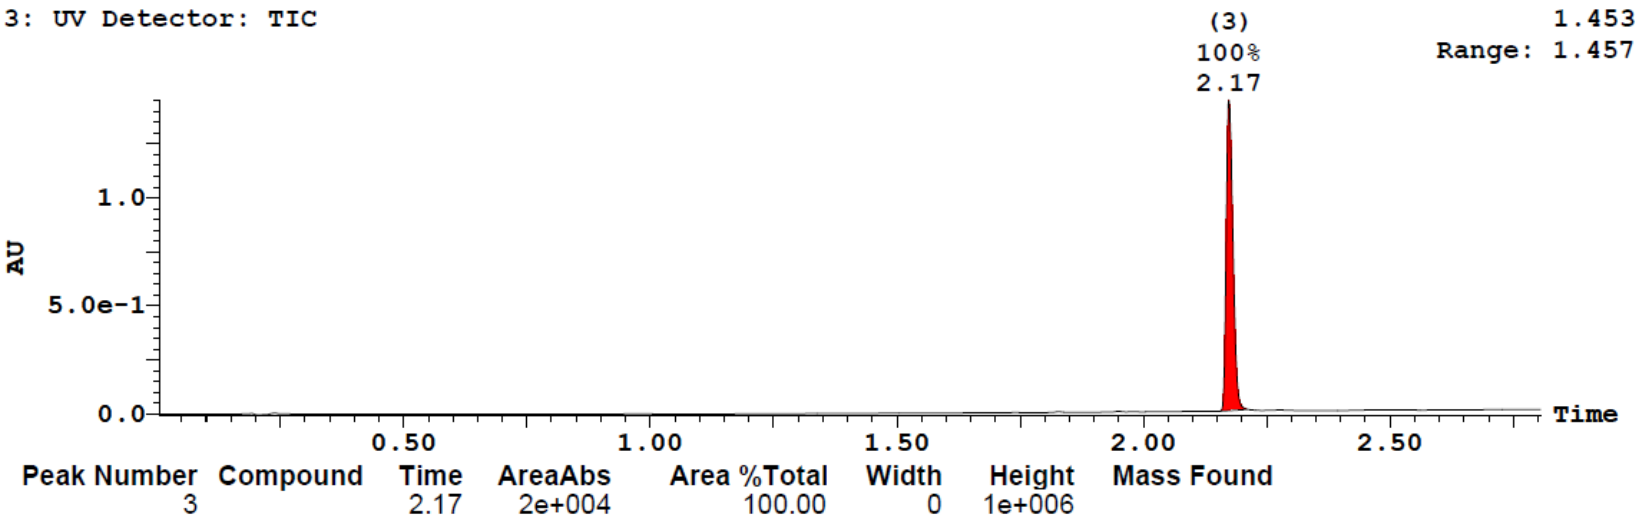

3: (Time: 2.17) Combine (866:874-(855:859+890:894))

1: MS ES+  
6.7e+006

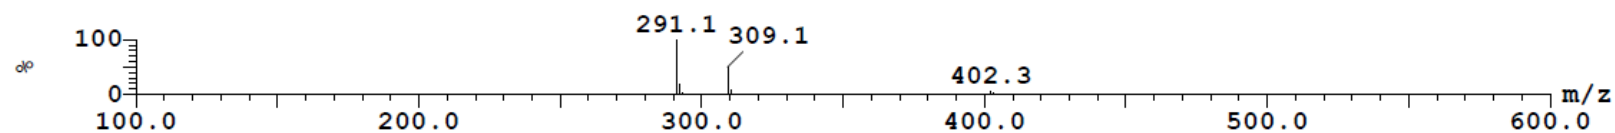

| Peak ID | Compound | Time | Mass Found |
|---------|----------|------|------------|
| 4       |          | 2.18 |            |

14UAMC5435

medchem\_140324\_M3 1043 (9.084) Cm (1040:1046-1075:1092)

1: TOF MS ES+  
1.00e8

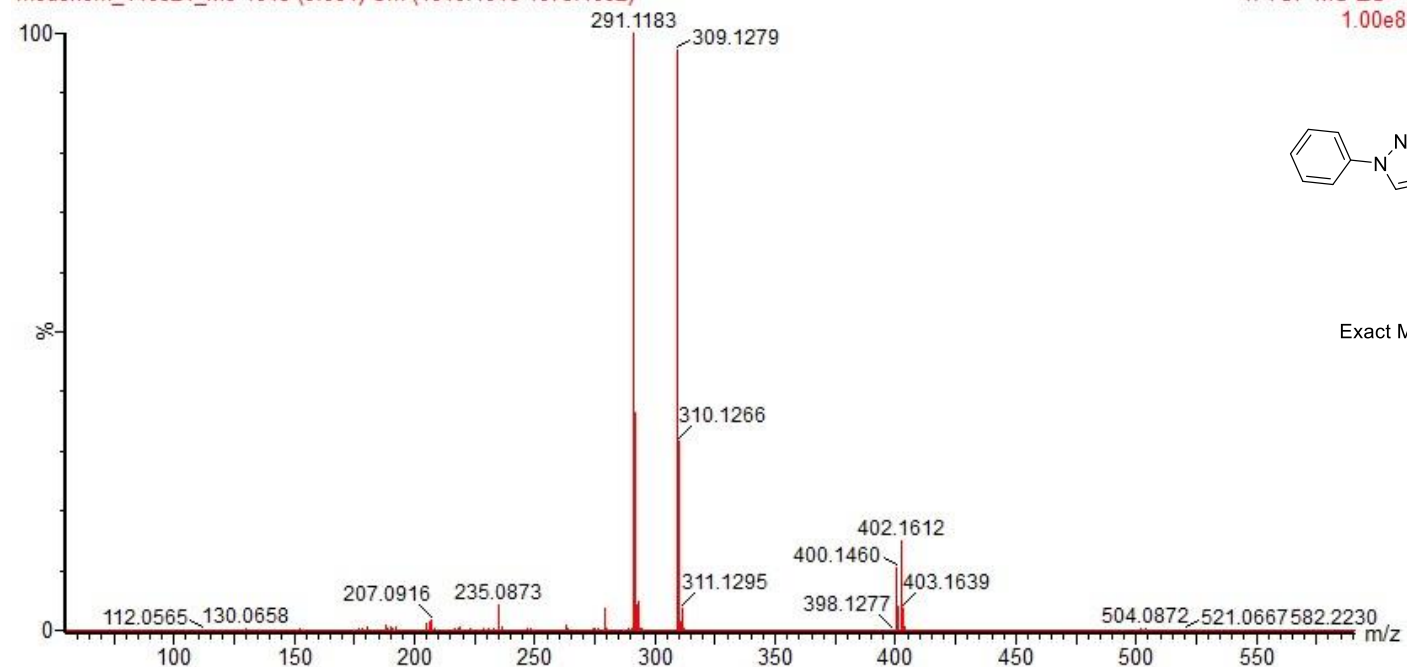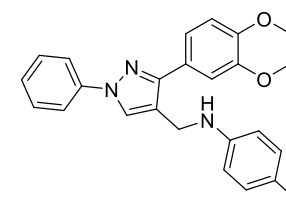

14

Exact Mass: 401,1540

2.3 N-((3-(2,3-dihydrobenzo[b][1,4]dioxin-6-yl)-1-phenyl-1H-pyrazol-4-yl)methyl)-2-phenylethan-1-amine hydrochloride (17)

1: MS ES+ :BPI Smooth (SG, 2x2) 1.7e+007

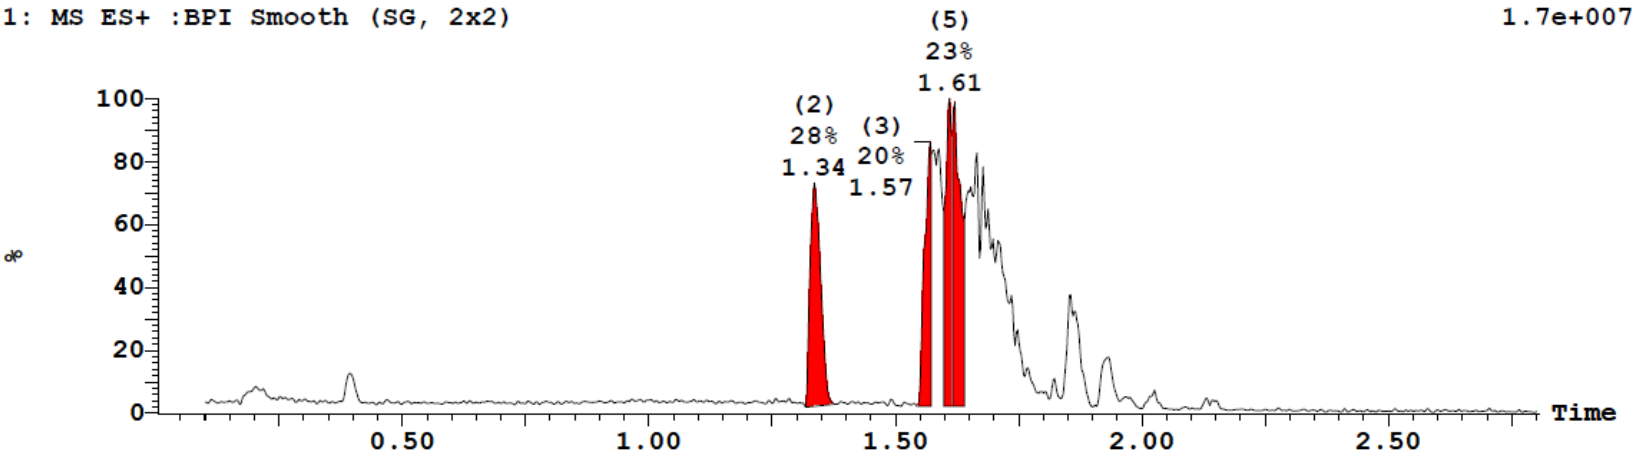

3: UV Detector: TIC 1.541  
Range: 1.545

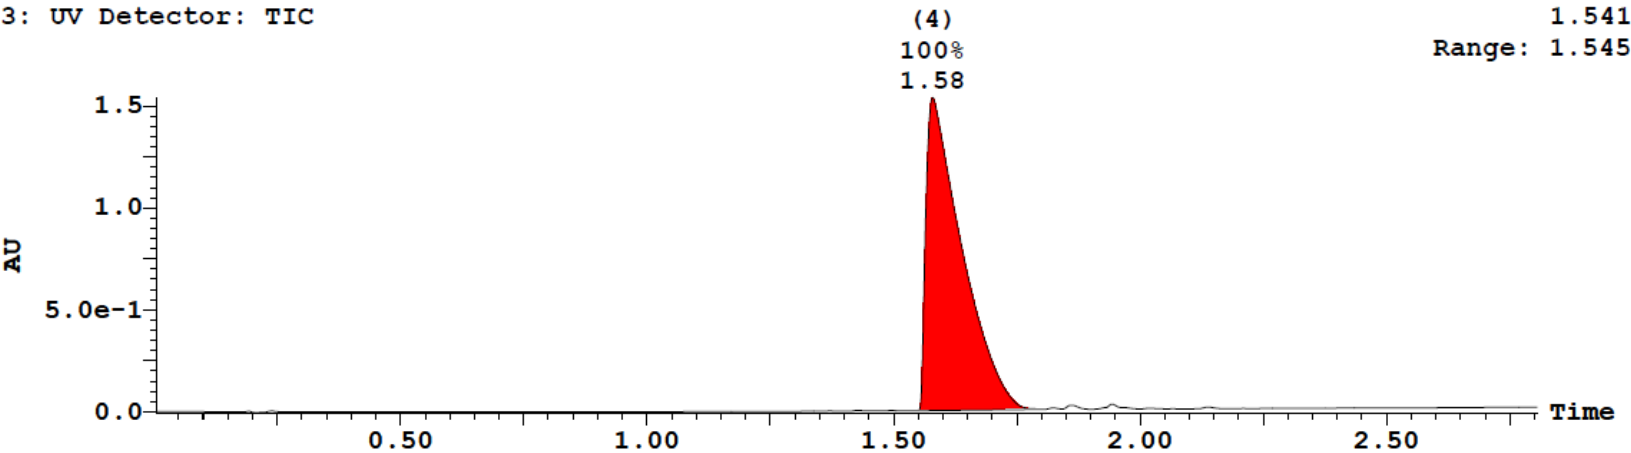

| Peak Number | Compound | Time | AreaAbs | Area %Total | Width | Height | Mass Found |
|-------------|----------|------|---------|-------------|-------|--------|------------|
| 4           |          | 1.58 | 1e+005  | 100.00      | 0     | 2e+006 |            |

| Peak ID | Compound | Time | Mass Found |
|---------|----------|------|------------|
| 4       |          | 1.58 |            |

4: (Time: 1.58) Combine (628:636-(610:614+727:731))

1:MS ES+  
1.3e+007

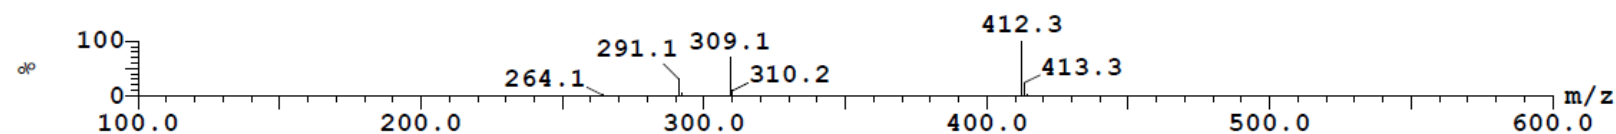

17UAMC5404

medchem\_140324\_M5 715 (6.232) Cm (711:719-754:784)

1: TOF MS ES+  
9.43e7

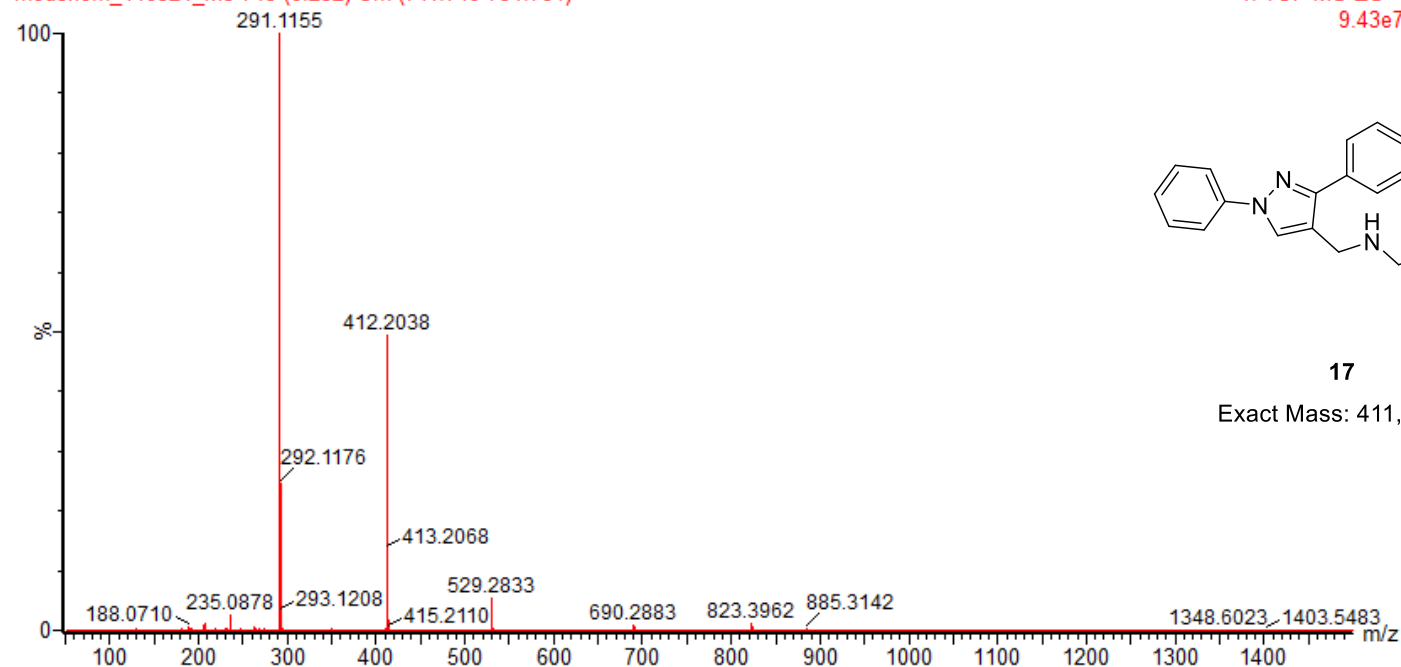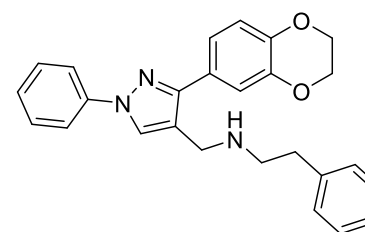

17

Exact Mass: 411,1947

2.4 4-(4-(((3-(2,3-dihydrobenzo[b][1,4]dioxin-6-yl)-1-phenyl-1H-pyrazol-4-yl)methyl)amino)phenoxy)-N-methylpicolinamide (22)

Sample 1 Vial 2:37 ID UAMC-5410 File UAMC-5410 Date 12-Apr-2023 Time 13:17:45 Description

1: MS ES+ :BPI Smooth (SG, 2x2)

5.9e+006

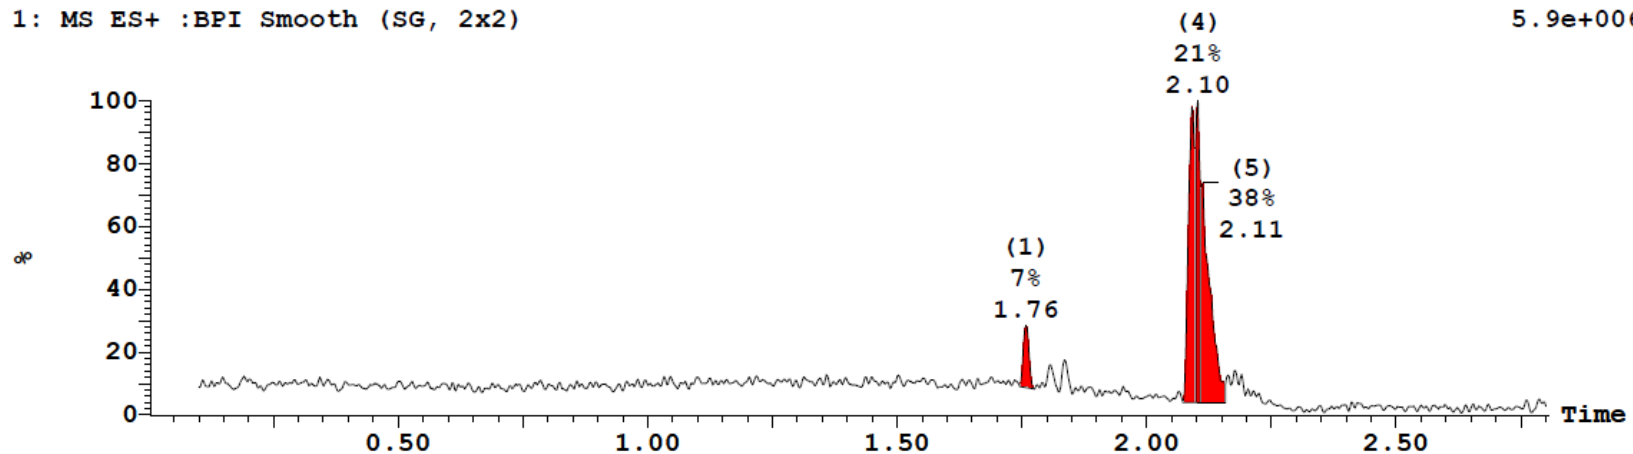

3: UV Detector: TIC

3.03  
Range: 3.033

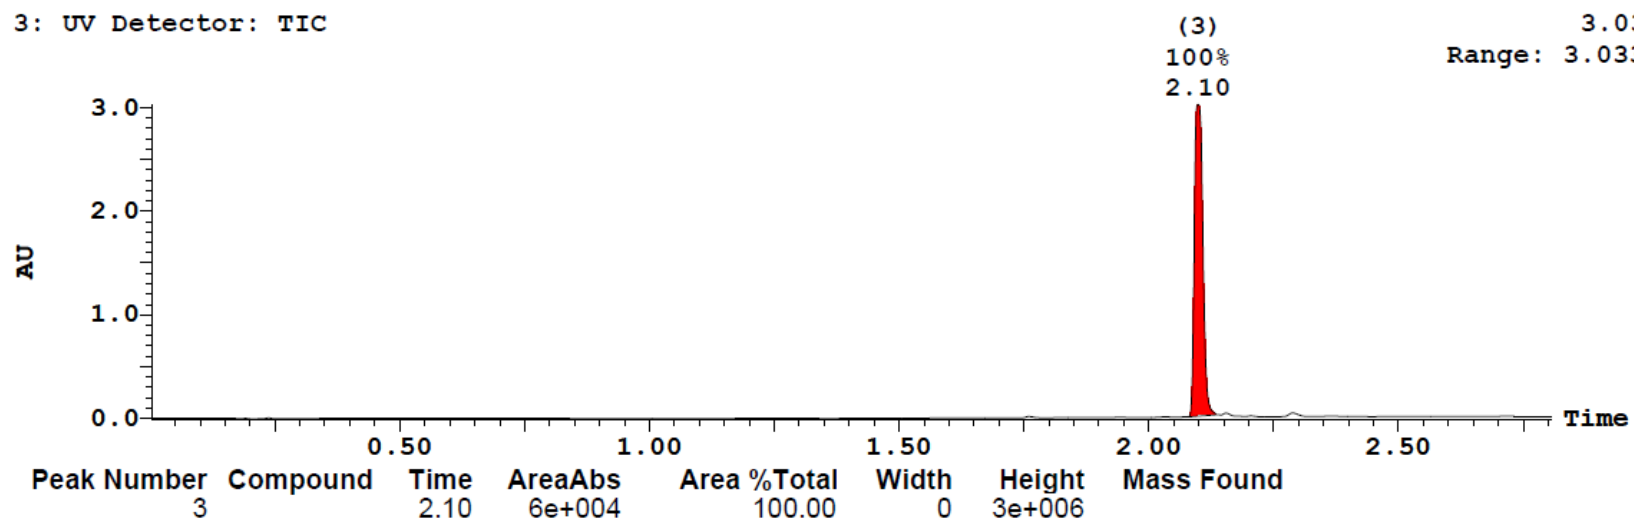

| Peak Number | Compound | Time | AreaAbs | Area %Total | Width | Height | Mass Found |
|-------------|----------|------|---------|-------------|-------|--------|------------|
| 3           |          | 2.10 | 6e+004  | 100.00      | 0     | 3e+006 |            |

Peak ID Compound Time Mass Found  
3 2.09  
3: (Time: 2.10) Combine (836:844-(824:828+861:865))

1:MS ES+  
4.9e+006

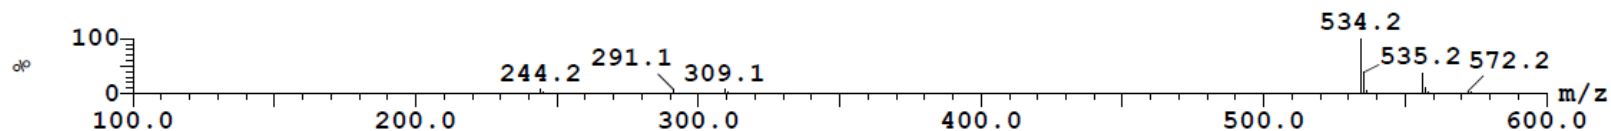

22UAMC5410

medchem\_140324\_M7 1009 (8.786) Cm (1007:1014-1096:1168)

1: TOF MS ES+  
8.72e7

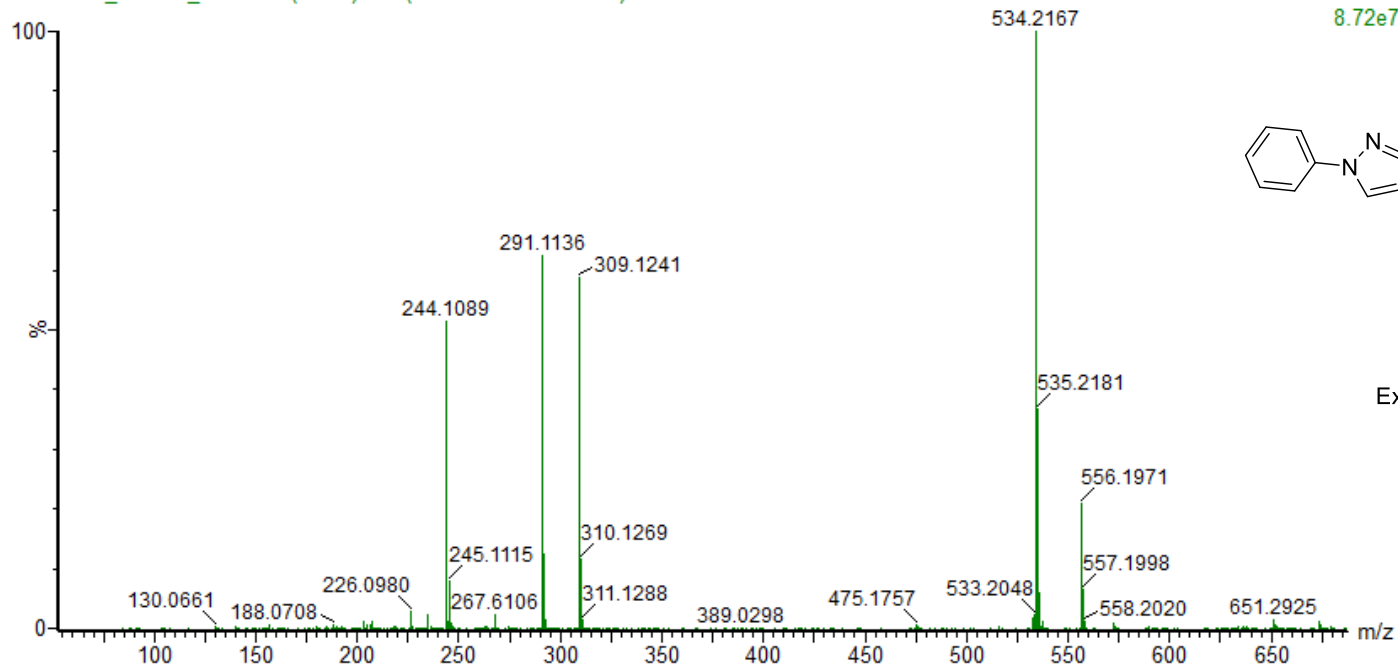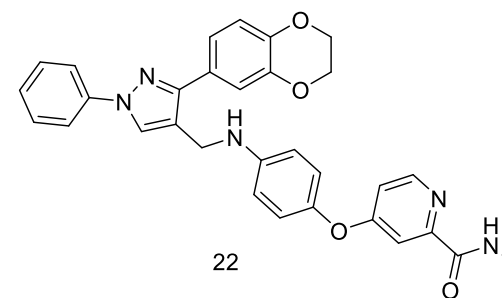

Exact Mass: 533,2063

2.5 *N*-((3-(2,3-dihydrobenzo[*b*][1,4]dioxin-6-yl)-1-phenyl-1*H*-pyrazol-4-yl)methyl)-2-(pyrrolidin-1-yl)ethan-1-amine dihydrochloride (26)

Sample 1 Vial 2:74 ID MB-2021-054B CHK File MB-2021-054B CHK Date 22-Feb-2023 Time 10:17:46 Description

1: MS ES+ :BPI Smooth (SG, 2x2)

1.1e+007

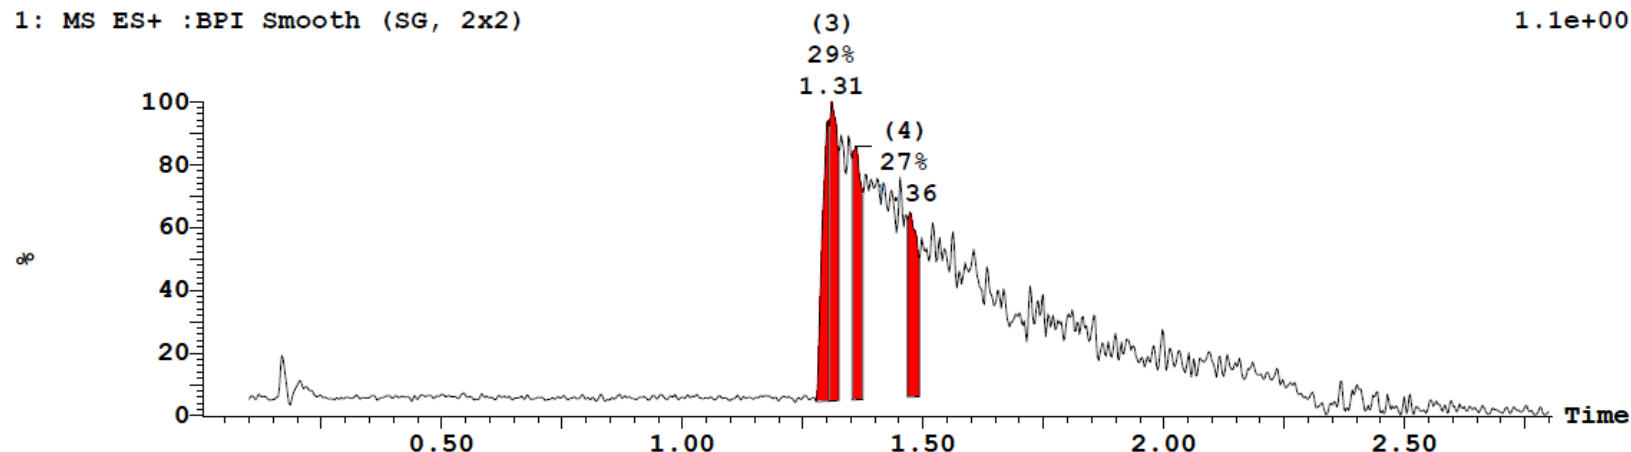

3: UV Detector: TIC

3.04e-1

Range: 3.074e-1

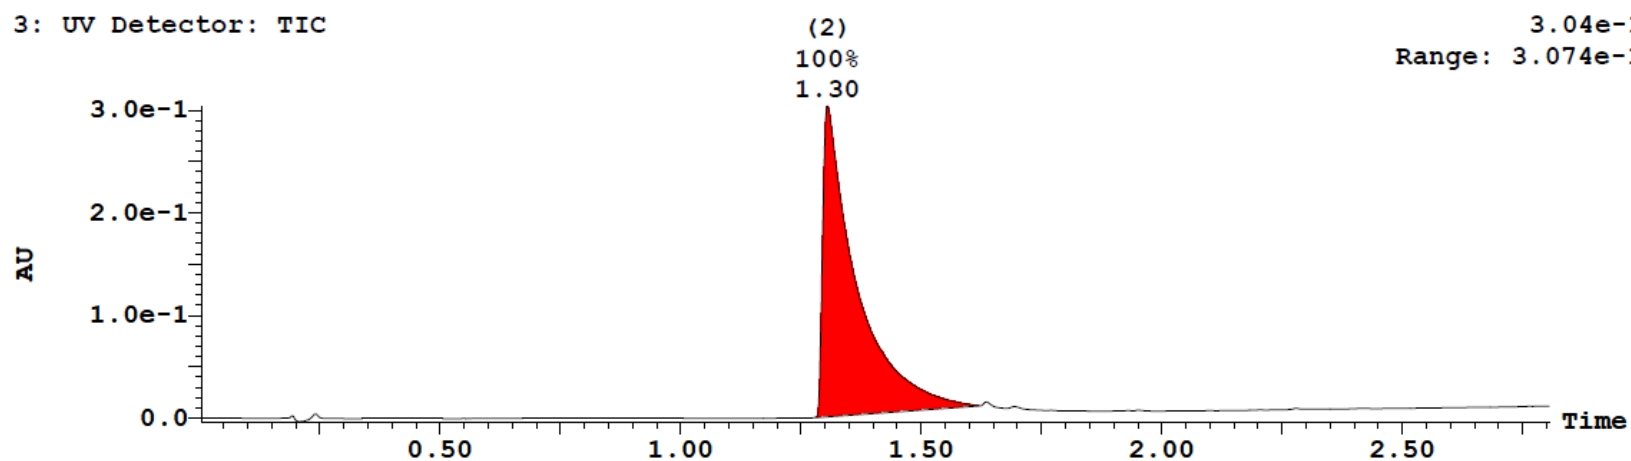

| Peak Number | Compound | Time | AreaAbs | Area %Total | Width | Height | Mass Found |
|-------------|----------|------|---------|-------------|-------|--------|------------|
| 2           |          | 1.30 | 2e+004  | 100.00      | 0     | 3e+005 |            |



2: (Time: 1.30) Combine (519:527- (504:508+654:658))

1: MS ES+  
7.4e+006

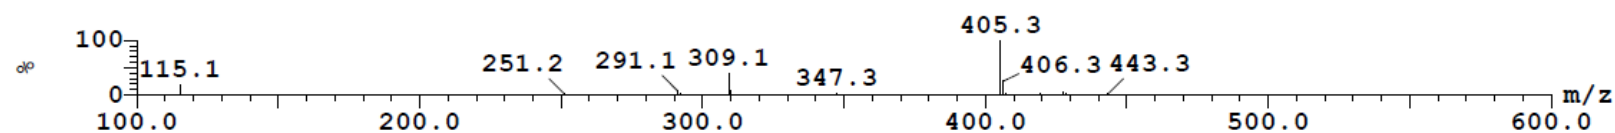

26UAMC5295

medchem\_140324\_M9 419 (3.662) Cm (418.449)

1: TOF MS ES+  
4.82e7

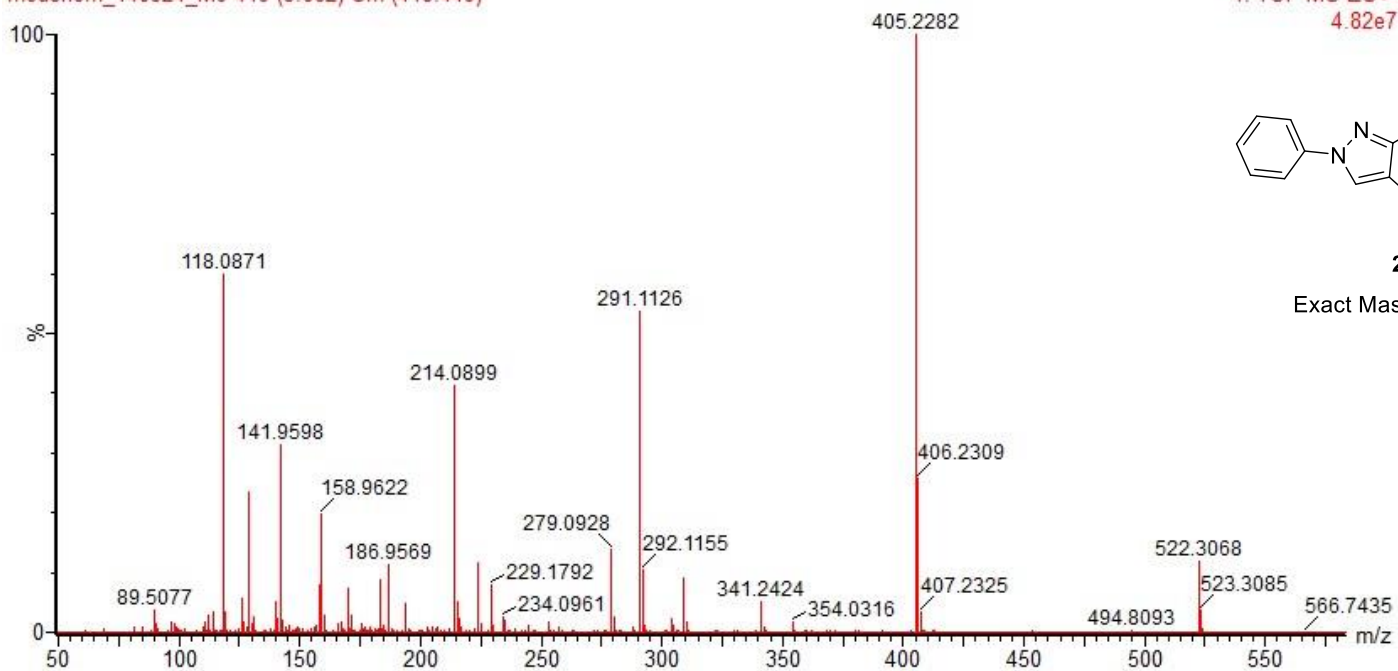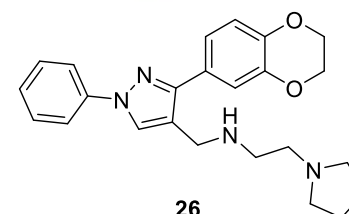

26

Exact Mass: 404,2212

2.6 *N*<sup>1</sup>-((3-(2,3-dihydrobenzo[*b*][1,4]dioxin-6-yl)-1-phenyl-1*H*-pyrazol-4-yl)methyl)-*N*<sup>3</sup>,*N*<sup>3</sup>-dimethylpropane-1,3-diamine dihydrochloride (29)

Sample 1 Vial 2:8 ID MB-2023-019 HCI File MB-2023-019 HCI Date 17-Feb-2023 Time 14:19:41 Description

1: MS ES+ :BPI Smooth (SG, 2x2)

1.3e+007

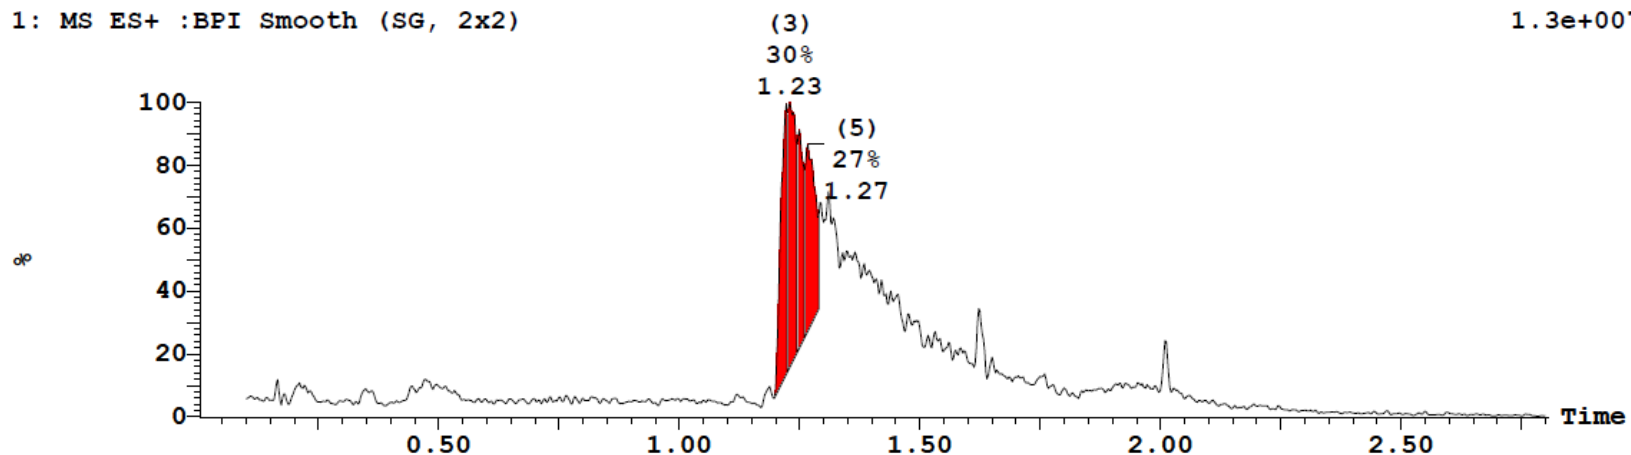

3: UV Detector: TIC

7.24e-1

Range: 7.271e-1

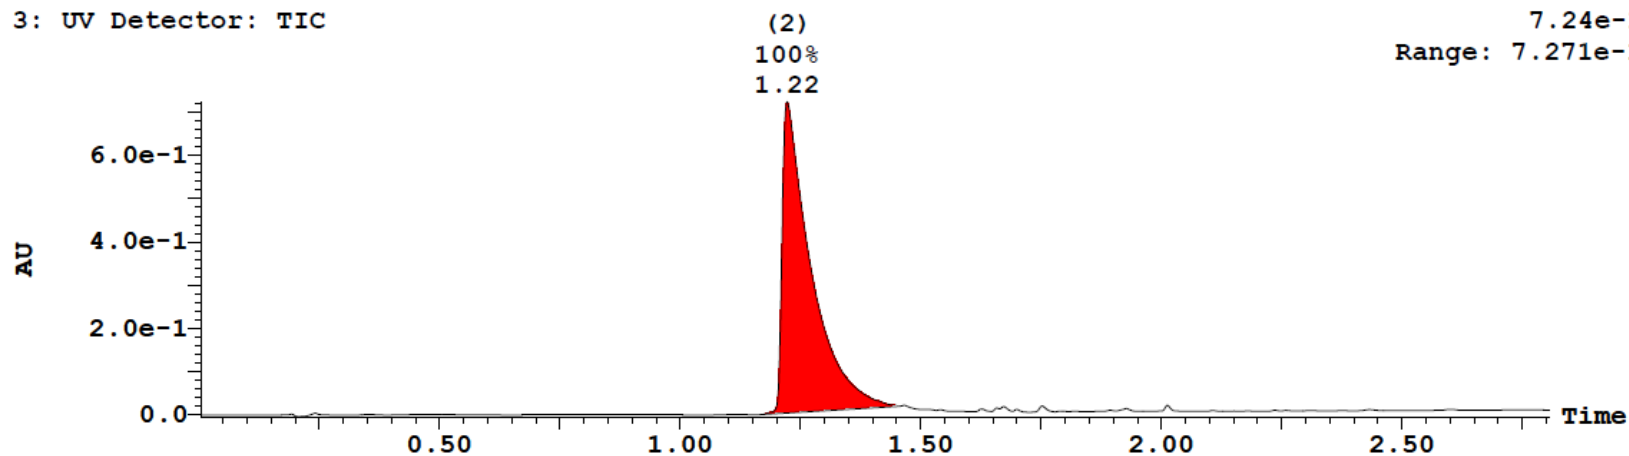

| Peak Number | Compound | Time | AreaAbs | Area %Total | Width | Height | Mass Found |
|-------------|----------|------|---------|-------------|-------|--------|------------|
| 2           |          | 1.22 | 5e+004  | 100.00      | 0     | 7e+005 |            |

2: (Time: 1.22) Combine (486:494-(459:463+588:592))

1: MS ES+  
9.9e+006

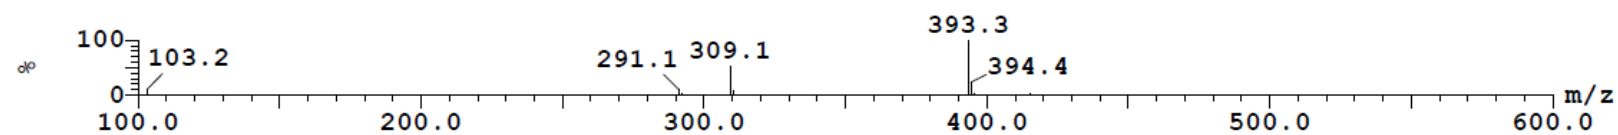

29UAMC5296

medchem\_140324\_M11 417 (3.644) Cm (412:451)

1: TOF MS ES+  
3.73e7

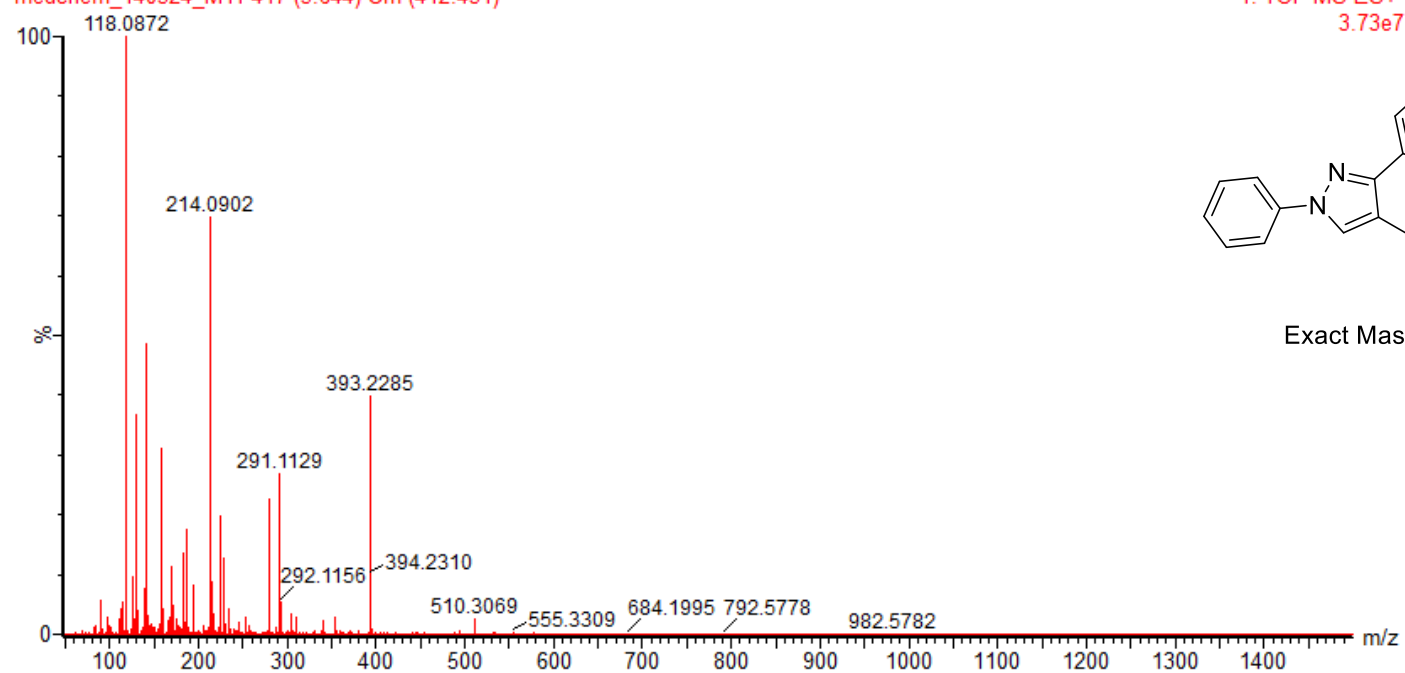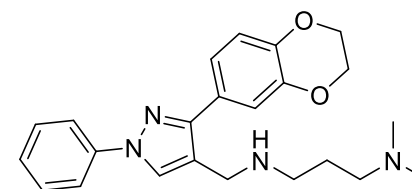

**29**

Exact Mass: 392,2212

2.7 3-(2,3-dihydrobenzo[b][1,4]dioxin-6-yl)-N-(4-fluorobenzyl)-1-phenyl-1H-pyrazole-4-carboxamide (33)

Sample 1 Vial 2:9 ID UAMC-5391 File UAMC-5391 Date 12-Apr-2023 Time 10:47:22 Description

1: MS ES+ :BPI Smooth (SG, 2x2)

5.0e+006

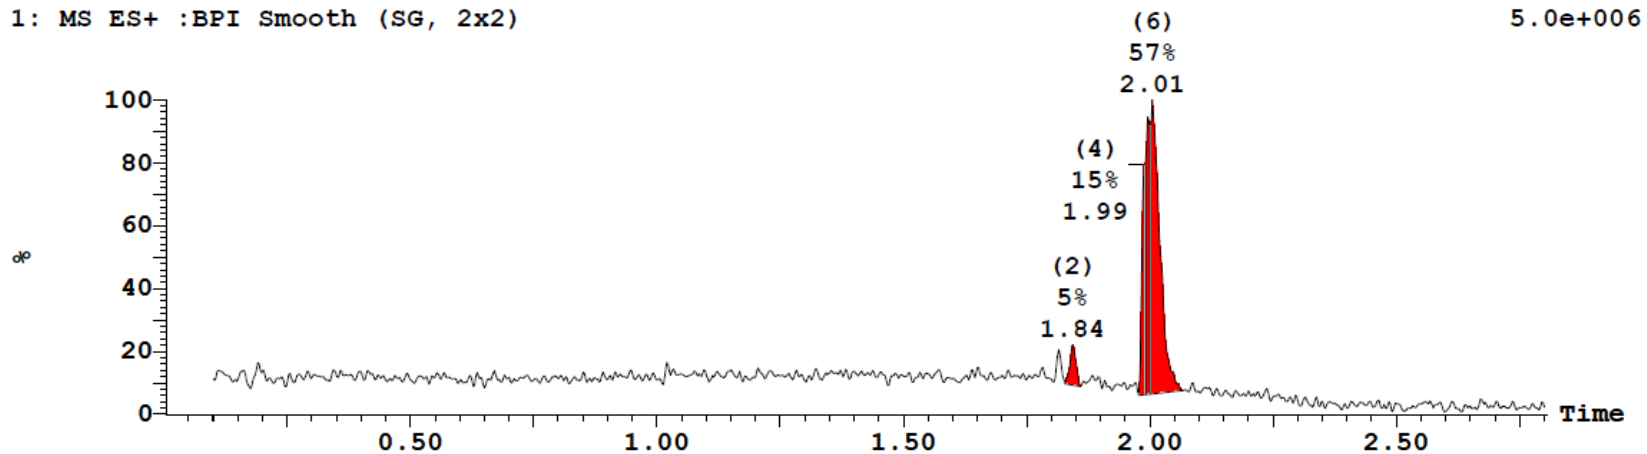

3: UV Detector: TIC

1.099

Range: 1.103

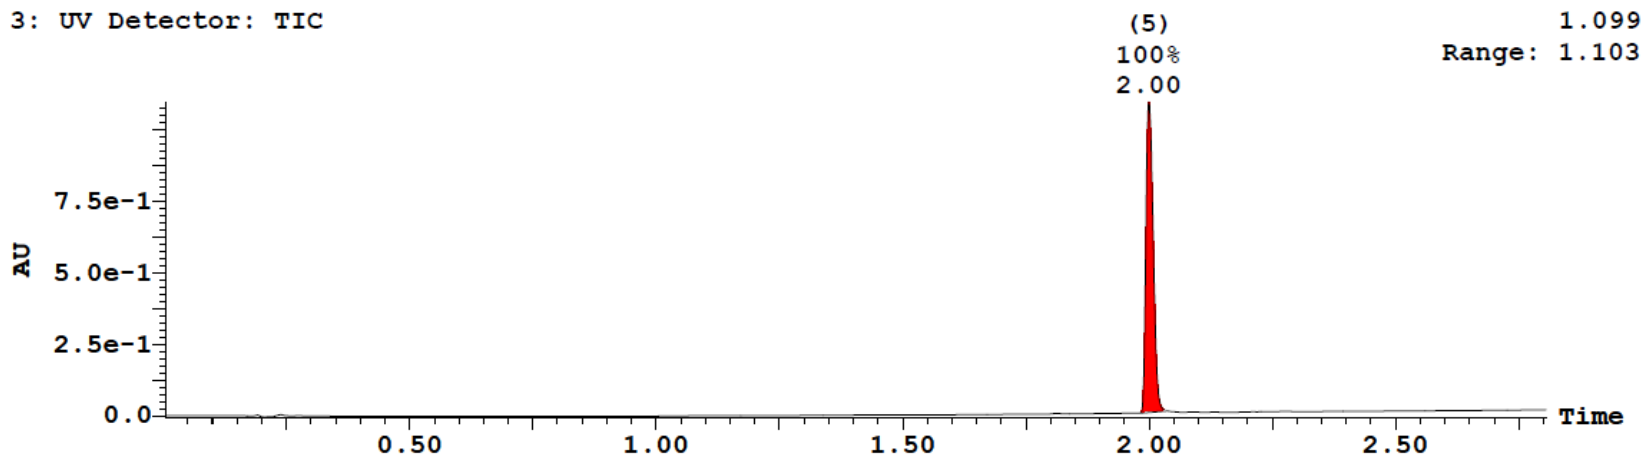

| Peak Number | Compound | Time | AreaAbs | Area %Total | Width | Height | Mass Found |
|-------------|----------|------|---------|-------------|-------|--------|------------|
| 5           |          | 2.00 | 2e+004  | 100.00      | 0     | 1e+006 |            |

5: (Time: 2.00) Combine (797:805-(785:789+820:824))

1:MS ES+  
4.2e+006

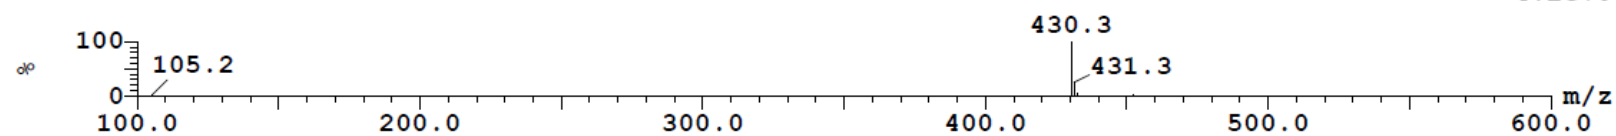

| Peak ID | Compound | Time | Mass Found |
|---------|----------|------|------------|
| 6       |          | 2.01 |            |

33UAMC5391

medchem\_140324\_M13 932 (8.119) Cm (928:935-845:861)

1: TOF MS ES+  
8.59e7

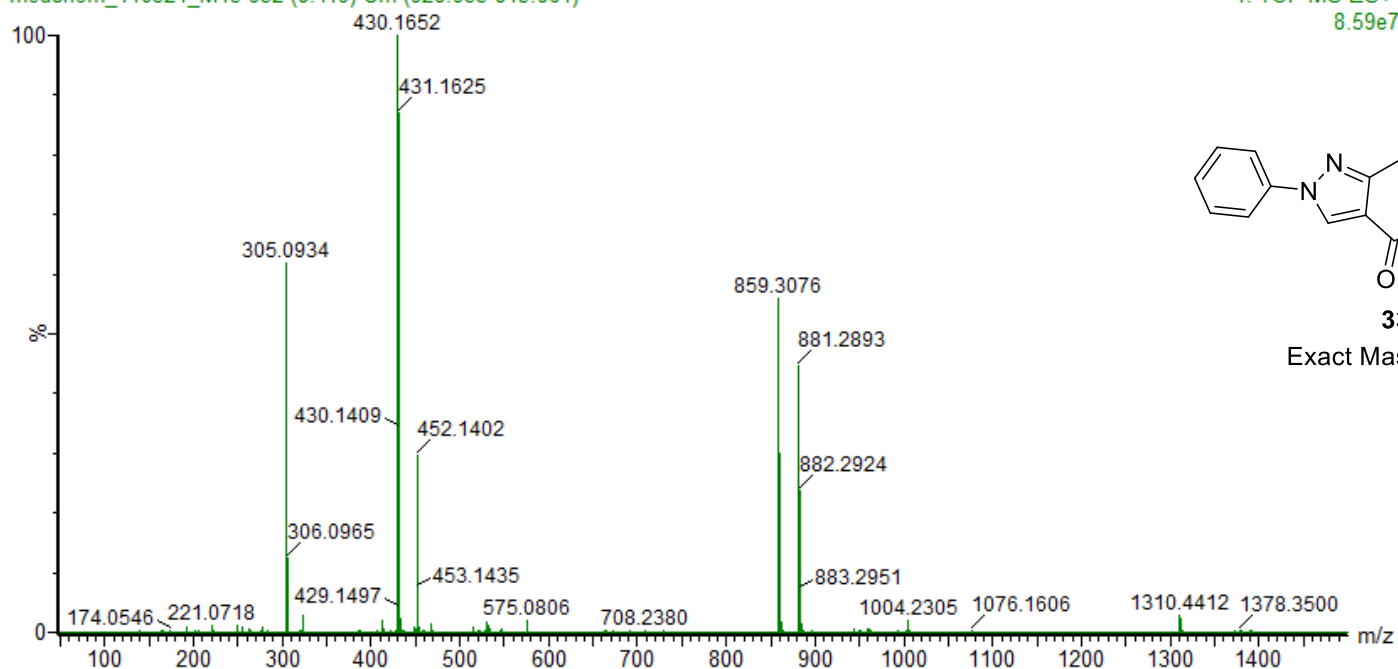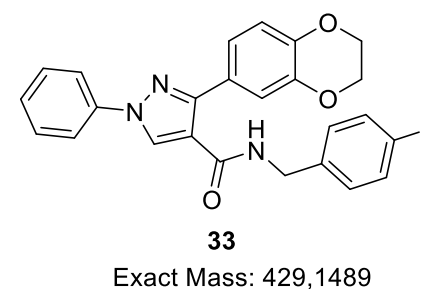

2.8 3-(2,3-dihydrobenzo[b][1,4]dioxin-6-yl)-1-phenyl-N-(2-(pyridin-4-yl)ethyl)-1H-pyrazole-4-carboxamide (35)

Sample 1 Vial 2:13 ID UAMC-5395 File UAMC-5395 Date 12-Apr-2023 Time 11:04:05 Description

1: MS ES+ :BPI Smooth (SG, 2x2)

1.8e+007

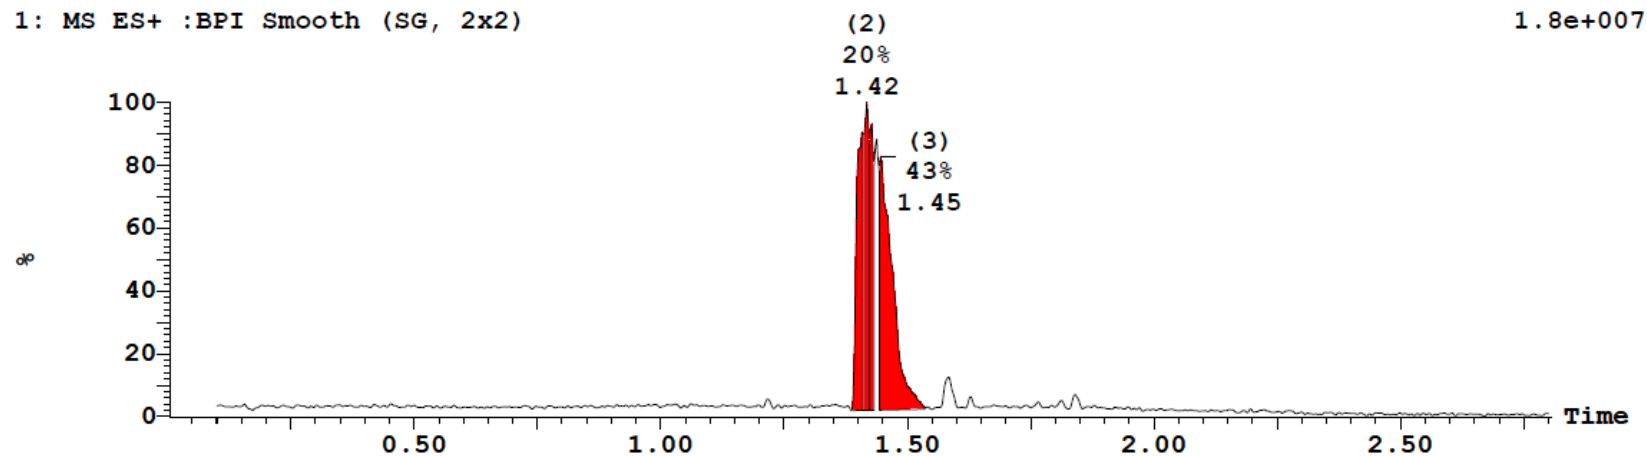

3: UV Detector: TIC

2.831

Range: 2.834

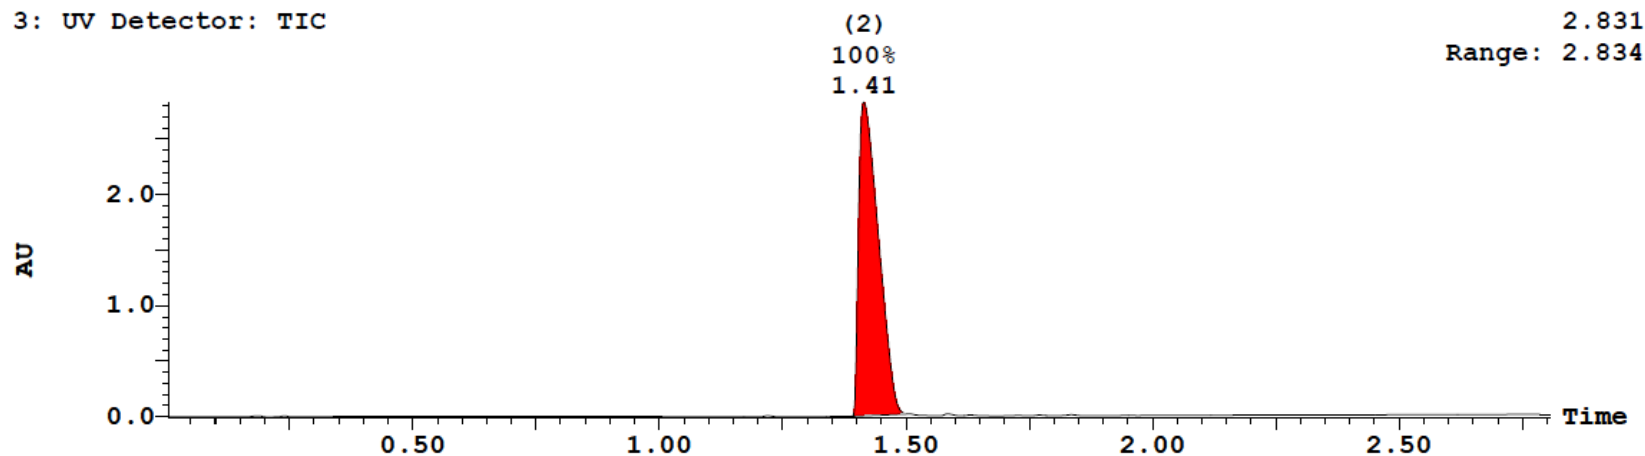

| Peak Number | Compound | Time | AreaAbs | Area %Total | Width | Height | Mass Found |
|-------------|----------|------|---------|-------------|-------|--------|------------|
| 2           |          | 1.41 | 1e+005  | 100.00      | 0     | 3e+006 |            |

2: (Time: 1.41) Combine (563:571- (548:552+606:610))

1: MS ES+  
1.6e+007

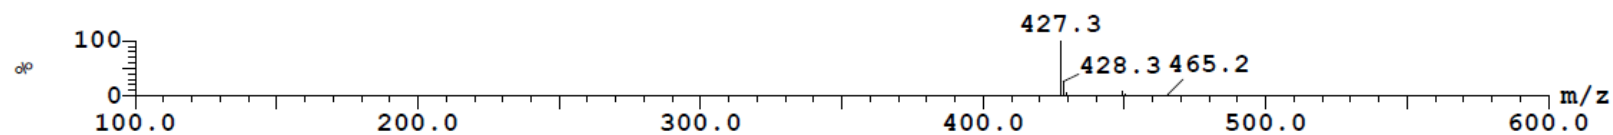

35UAMC5395

medchem\_140324\_M15 555 (4.841) Cm (552:560-499:513)

1: TOF MS ES+  
8.87e7

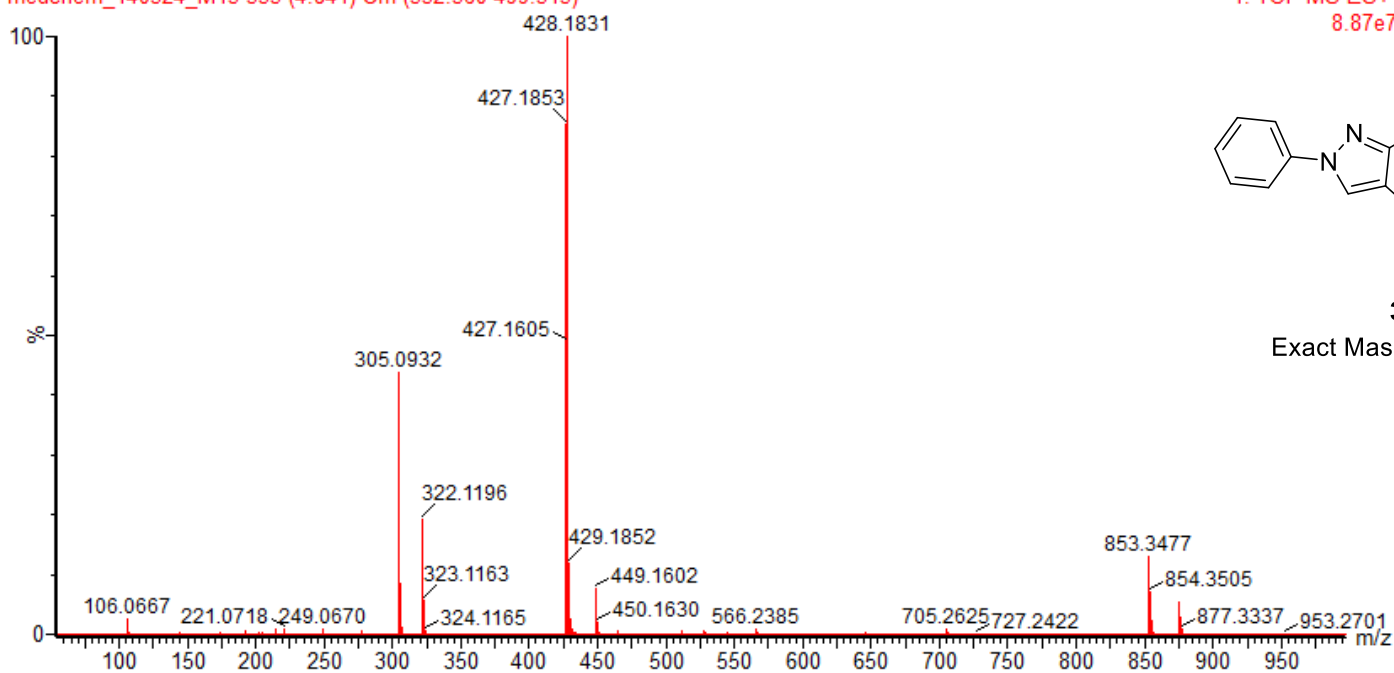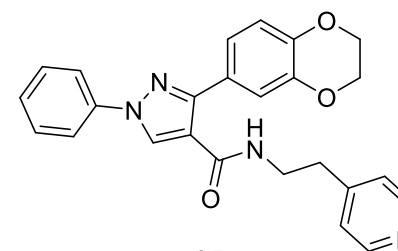

35

Exact Mass: 426,1692

2.9 4-(4-(3-(2,3-dihydrobenzo[b][1,4]dioxin-6-yl)-1-phenyl-1H-pyrazole-4-carboxamido)phenoxy)-N-methylpicolinamide (38)

Sample 1 Vial 1:50 ID UAMC-5393-2 File UAMC-5393-2 Date 13-Apr-2023 Time 16:59:32 Description

1: MS ES+ :BPI Smooth (SG, 2x2)

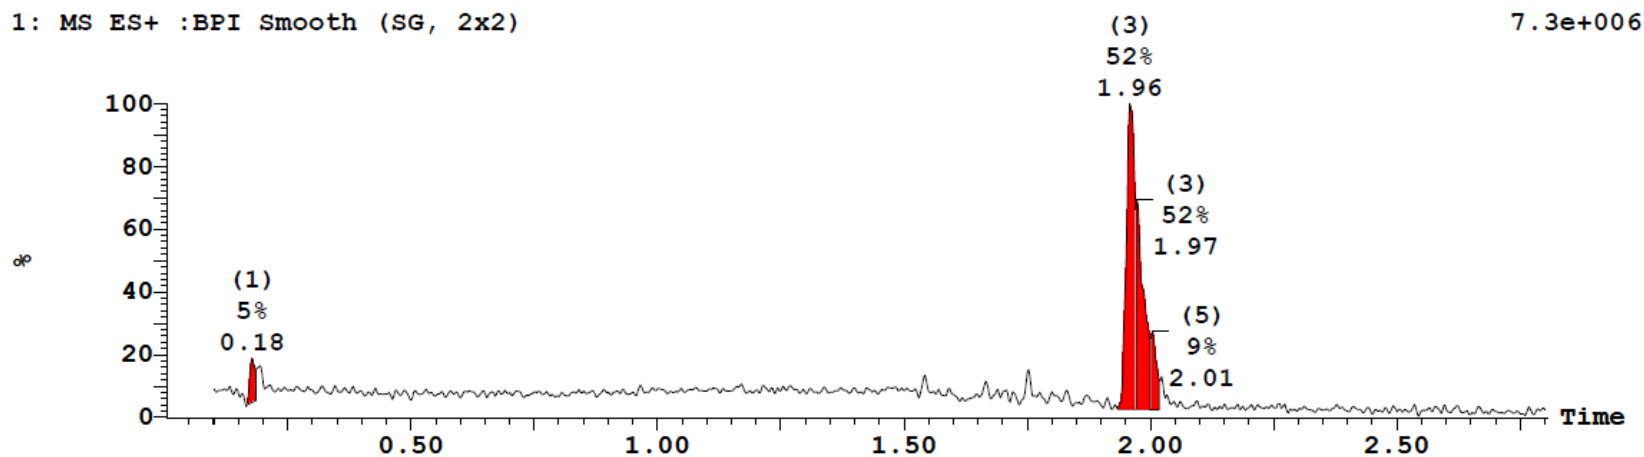

3: UV Detector: TIC

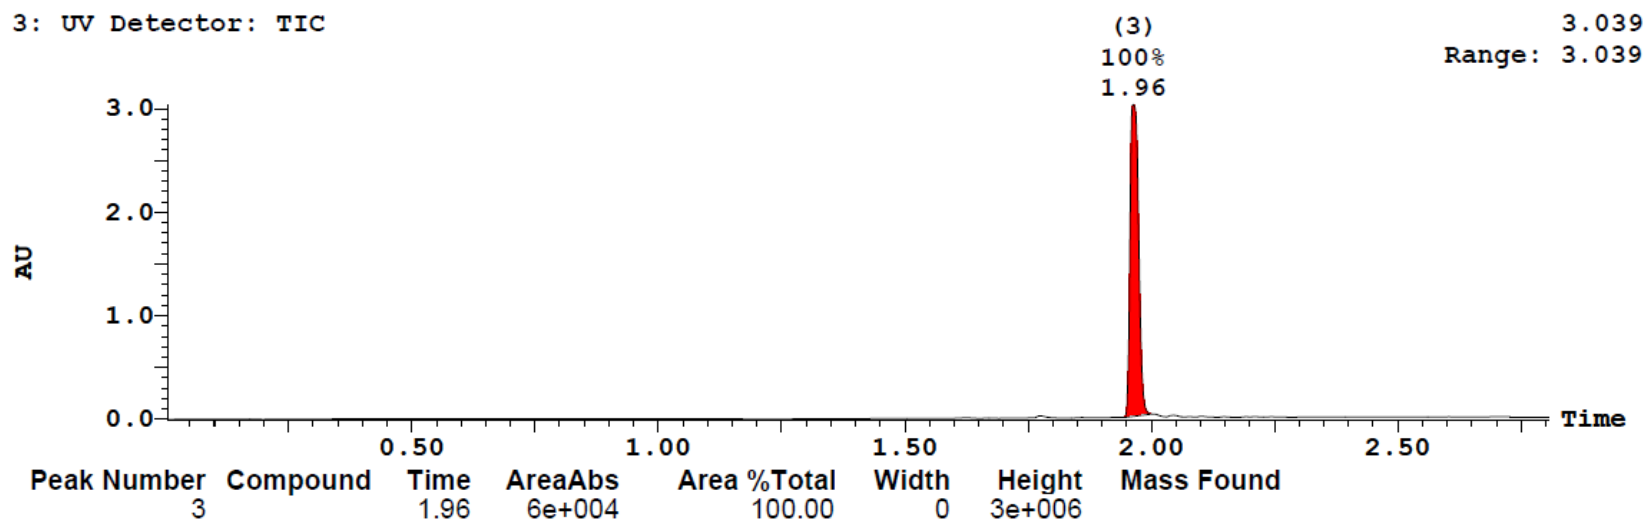



3: (Time: 1.96) Combine (782:790-(771:775+805:809))

1: MS ES+  
5.7e+006

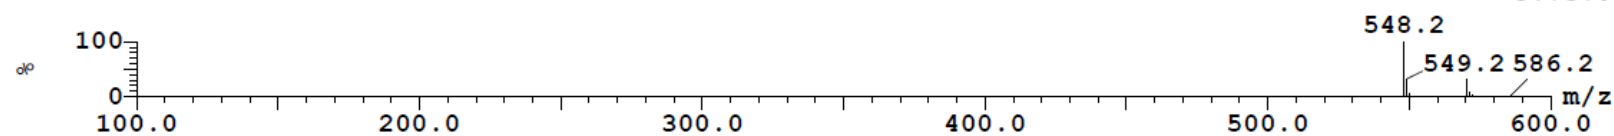

38UAMC5393

medchem\_140324\_M17 927 (8.076) Cm (924:931-865:882)

1: TOF MS ES+  
9.76e7

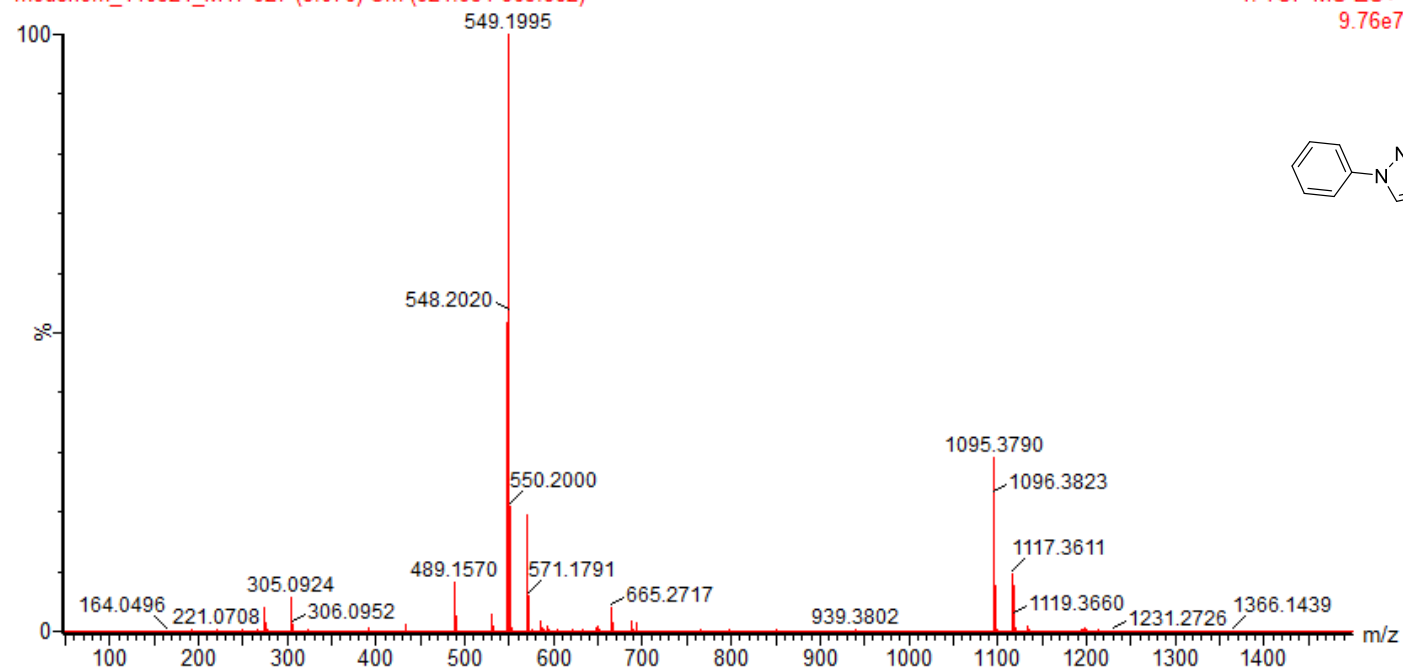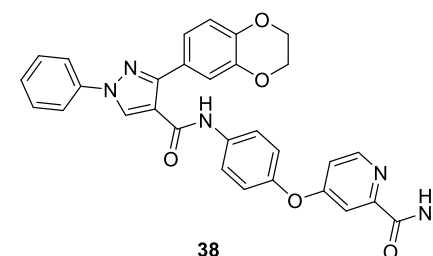

38  
Exact Mass: 547,1856

2.10 *N*-((1*r*,3*r*,5*r*,7*r*)-adamantan-2-yl)-3-(2,3-dihydrobenzo[*b*][1,4]dioxin-6-yl)-1-phenyl-1*H*-pyrazole-4-carboxamide (41)

Sample 1 Vial 2:19 ID UAMC-5398 File UAMC-5398 Date 12-Apr-2023 Time 11:38:24 Description

1: MS ES+ :BPI Smooth (SG, 2x2)

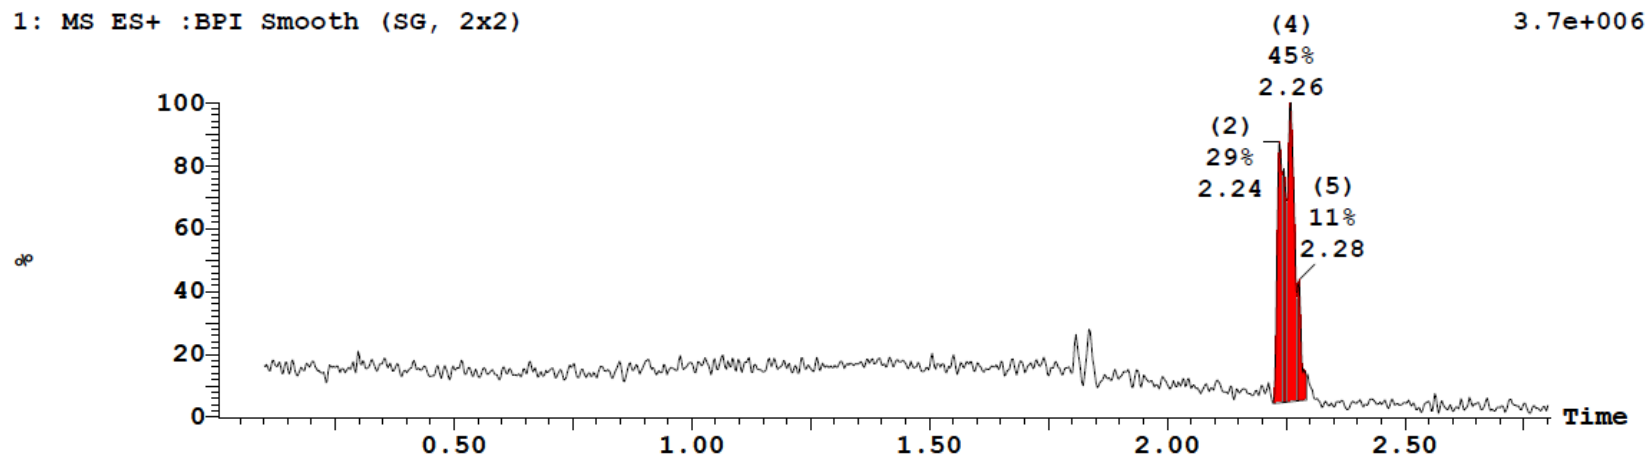

3: UV Detector: TIC

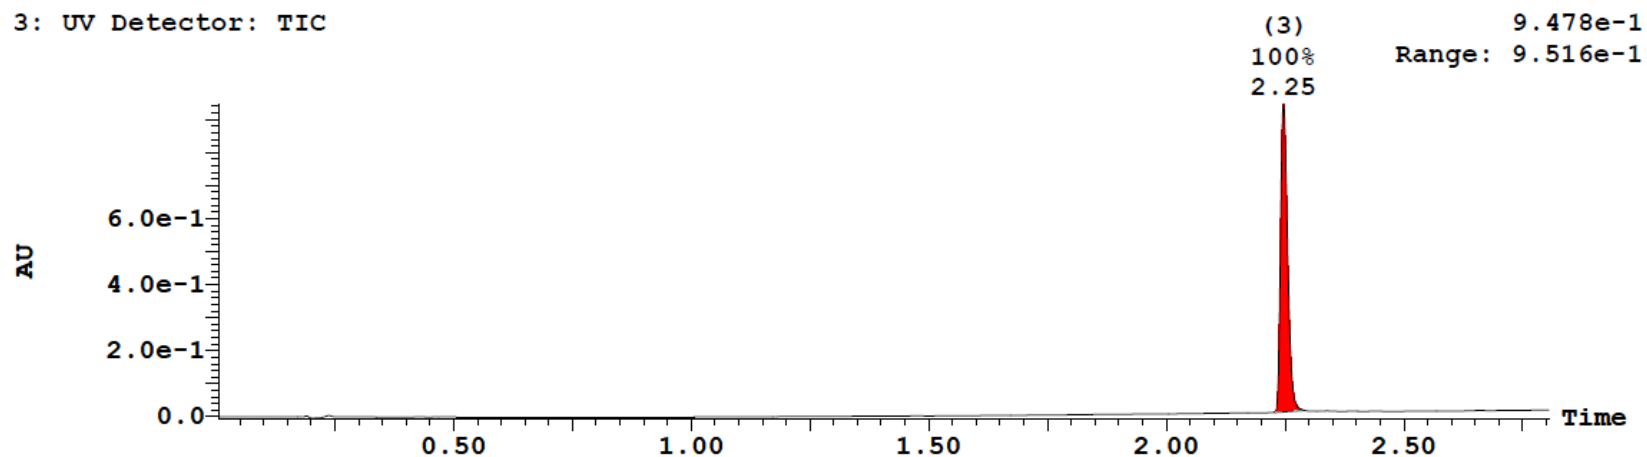

| Peak Number | Compound | Time | AreaAbs | Area %Total | Width | Height | Mass Found |
|-------------|----------|------|---------|-------------|-------|--------|------------|
| 3           |          | 2.25 | 2e+004  | 100.00      | 0     | 9e+005 |            |

3: (Time: 2.25) Combine (896:904-(883:887+921:925))

1: MS ES+  
2.8e+006

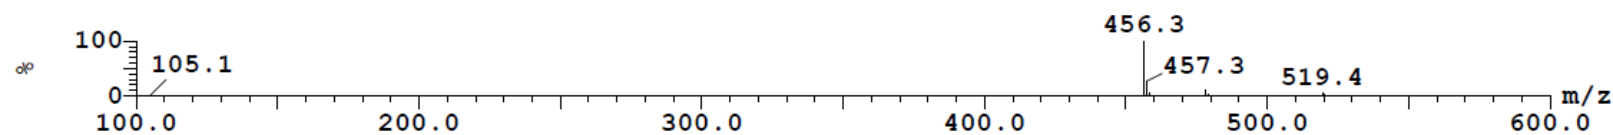

41UAMC5398

medchem\_140324\_M19 1116 (9.717) Cm (1112:1119-1149:1178)

1: TOF MS ES+  
1.04e8

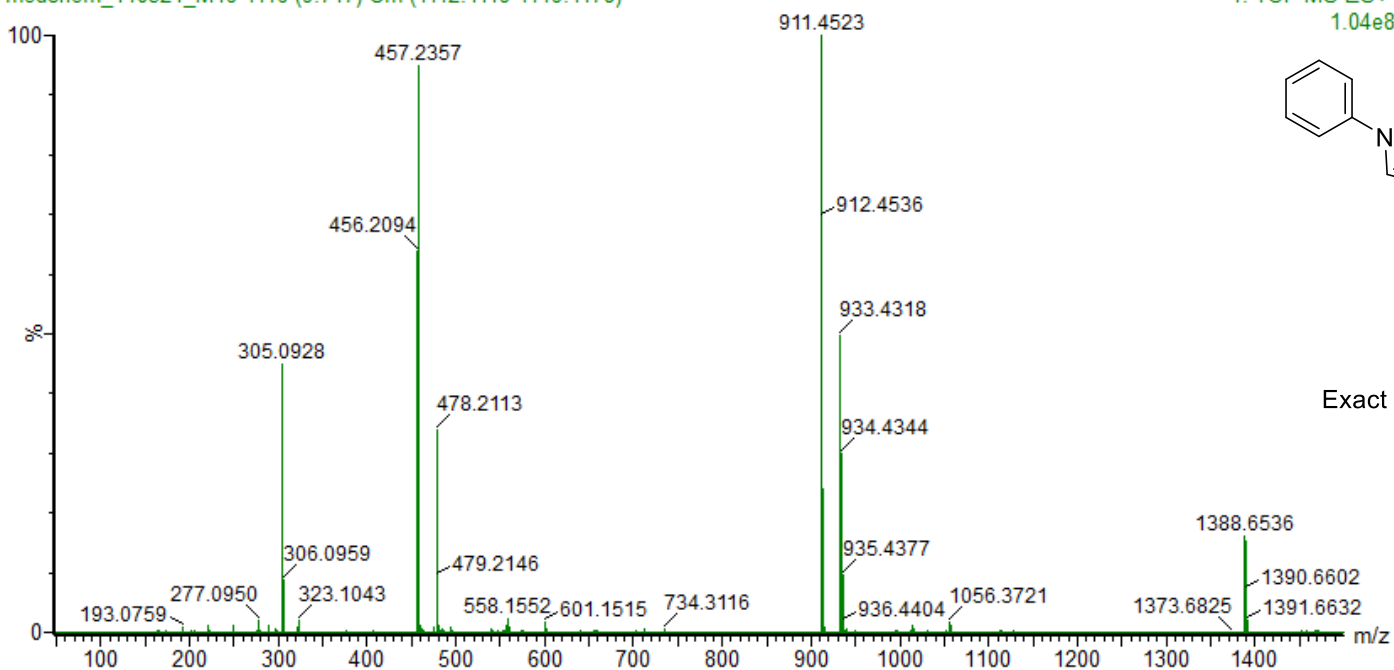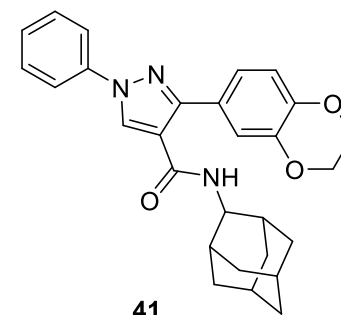

41

Exact Mass: 455,2209

2.11 3-(2,3-dihydrobenzo[b][1,4]dioxin-6-yl)-N-(2-morpholinoethyl)-1-phenyl-1H-pyrazole-4-carboxamide hydrochloride (44)

Sample 1 Vial 2:9 ID UAMC-5384 ACID FREE File UAMC-5384 ACID FREE Date 04-Nov-2023 Time 17:18:47 Description

1: MS ES+ :BPI Smooth (SG, 2x2)

9.8e+006

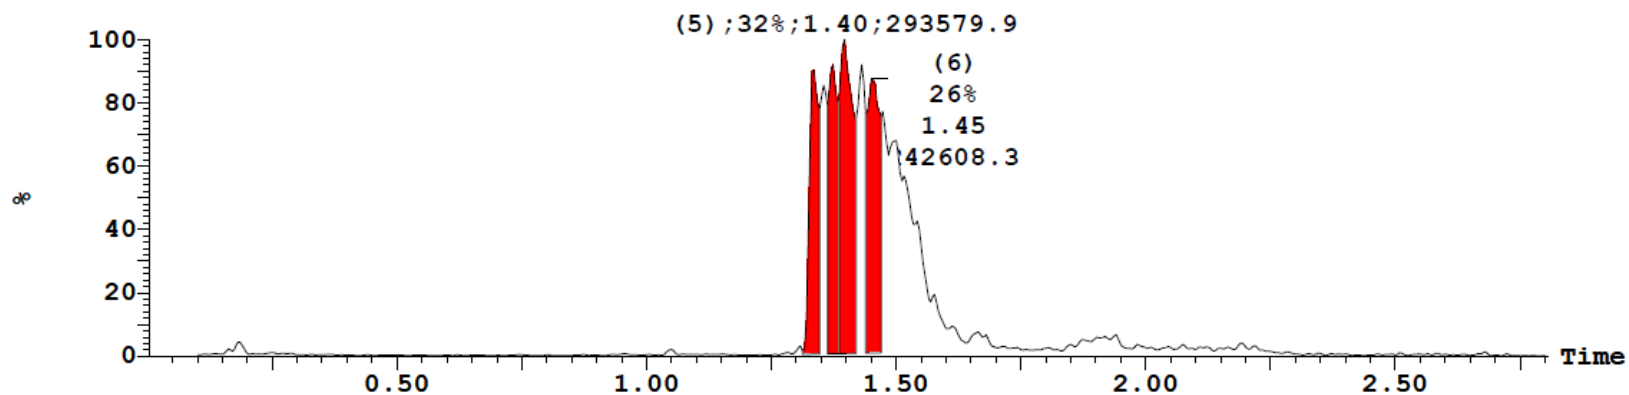

3: UV Detector: TIC

2.09

Range: 2.094

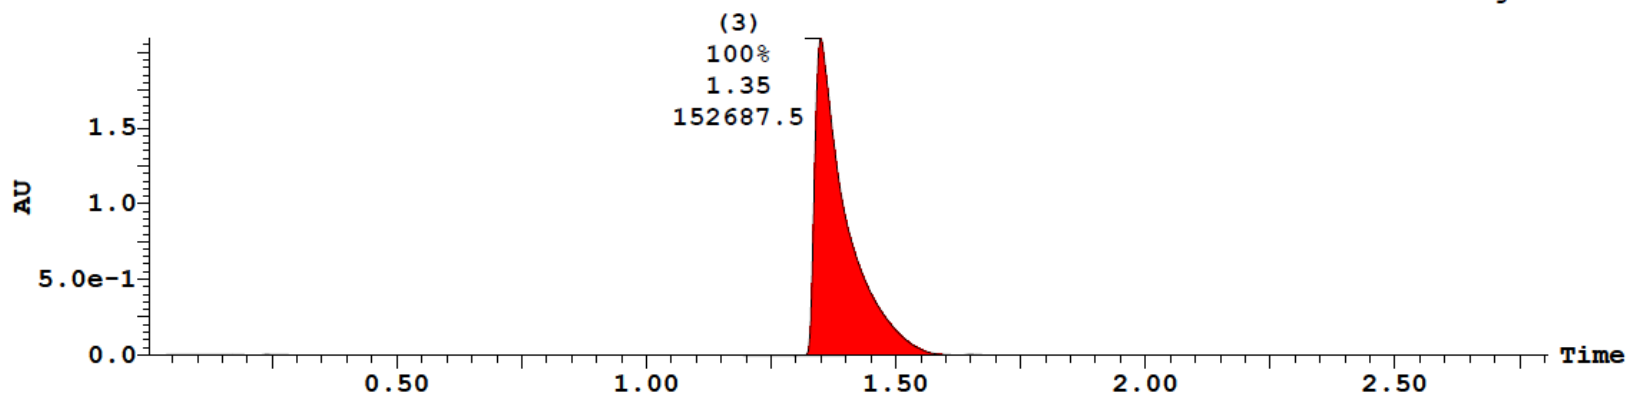

| Peak Number | Compound | Time | AreaAbs | Area %Total | Width | Height | Mass Found |
|-------------|----------|------|---------|-------------|-------|--------|------------|
| 3           |          | 1.35 | 2e+005  | 100.00      | 0     | 2e+006 |            |

3: (Time: 1.35) Combine (350:355- (333:336+425:428))

1: MS ES+  
7.9e+006

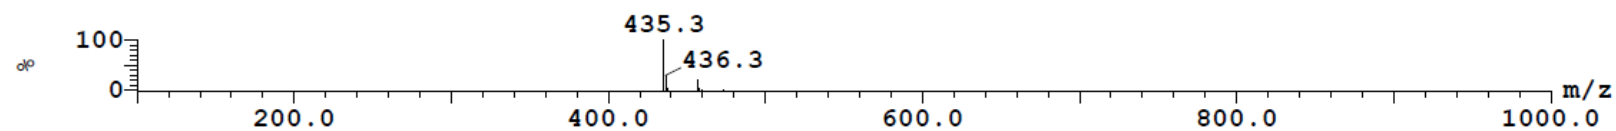

44UAMC5384

medchem\_140324\_M21 551 (4.807) Cm (546:558-447:482)

1: TOF MS ES+  
1.20e8

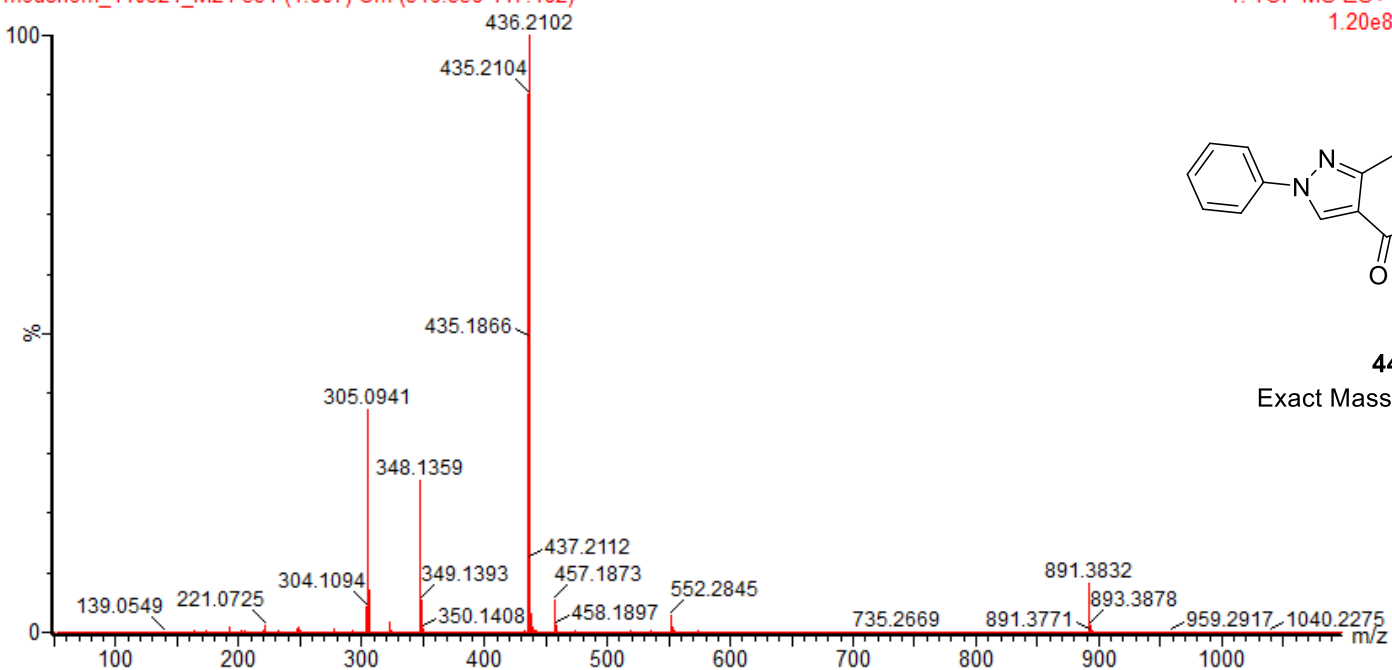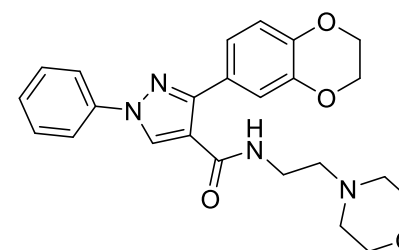

44

Exact Mass: 434,1954

2.12 1-benzyl-4-(((3-(2,3-dihydrobenzo[b][1,4]dioxin-6-yl)-1-phenyl-1H-pyrazol-4-yl)methoxy)methyl)-1H-1,2,3-triazole (48)

Sample 1 Vial 2:5 ID UAMC-5387 File UAMC-5387 Date 12-Apr-2023 Time 10:30:38 Description

1: MS ES+ :BPI Smooth (SG, 2x2)

5.1e+006

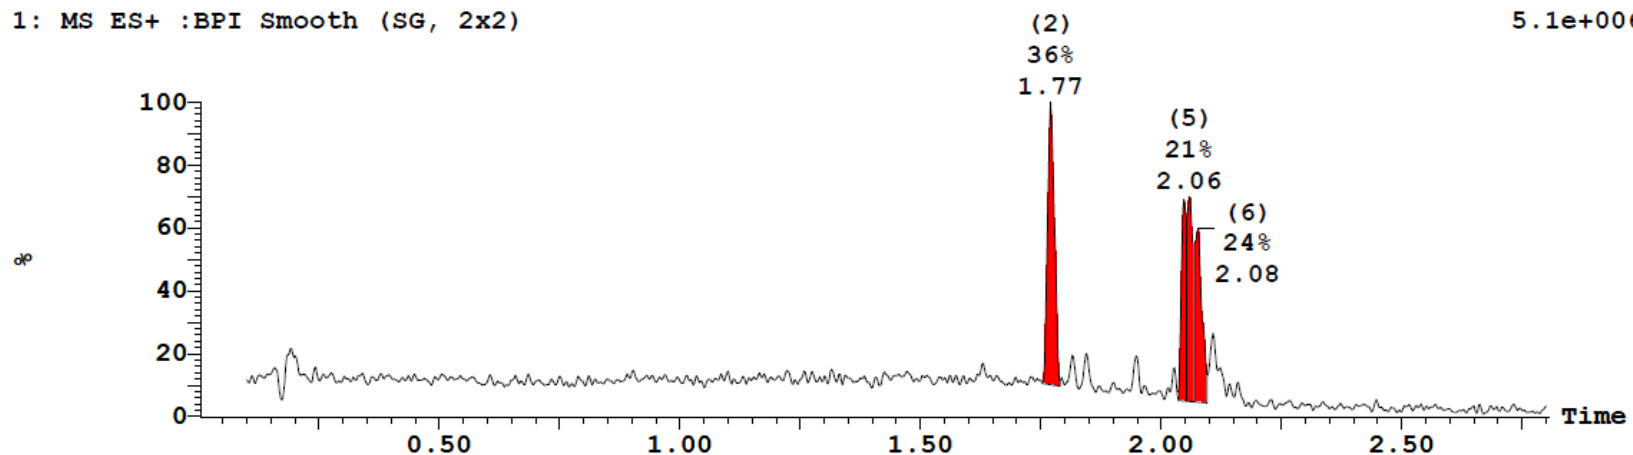

3: UV Detector: TIC

8.59e-1  
Range: 8.632e-1

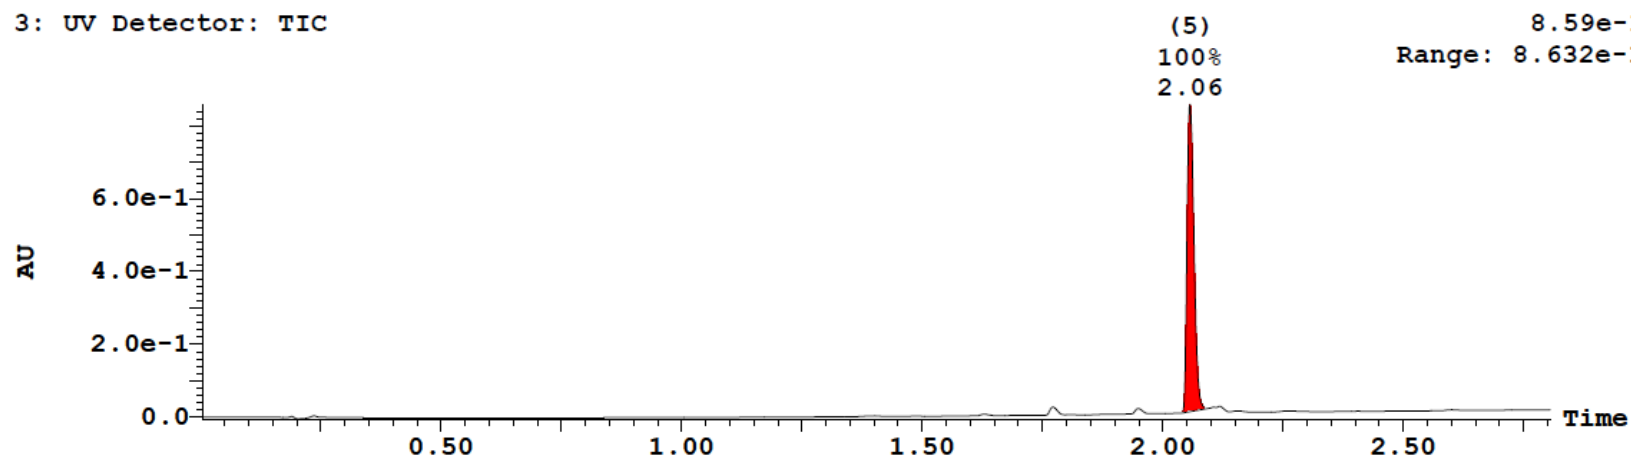

| Peak Number | Compound | Time | AreaAbs | Area %Total | Width | Height | Mass Found |
|-------------|----------|------|---------|-------------|-------|--------|------------|
| 5           |          | 2.06 | 1e+004  | 100.00      | 0     | 8e+005 |            |

5: (Time: 2.06) Combine (820:828-(809:813+842:846))

1: MS ES+  
3.0e+006

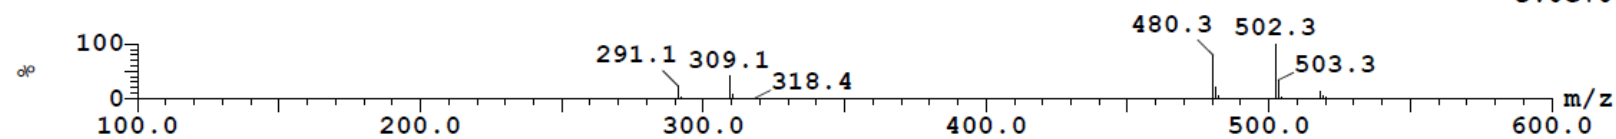

| Peak ID | Compound | Time | Mass Found |
|---------|----------|------|------------|
| 6       |          | 2.08 |            |

48UAMC5387

medchem\_140324\_M23 980 (8.537) Cm (974:987-820:876)

1: TOF MS ES+  
1.69e8

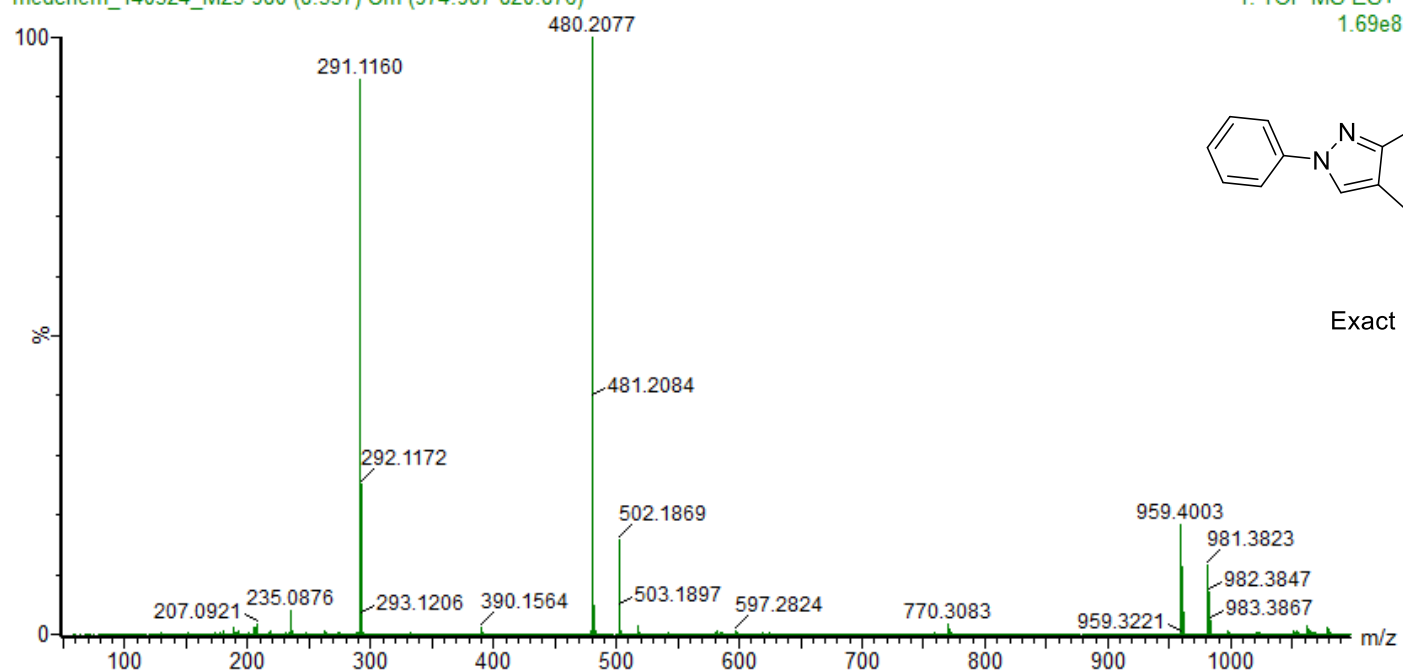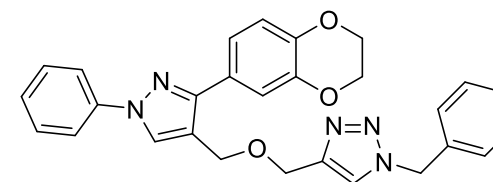

**48**

Exact Mass: 479,1957

2.13 4-benzyl-3-(2,3-dihydrobenzo[b][1,4]dioxin-6-yl)-1-phenyl-1H-pyrazole (49)

Sample 1 Vial 2:12 ID UAMC-5394 File UAMC-5394 Date 12-Apr-2023 Time 10:59:54 Description

1: MS ES+ :BPI Smooth (SG, 2x2)

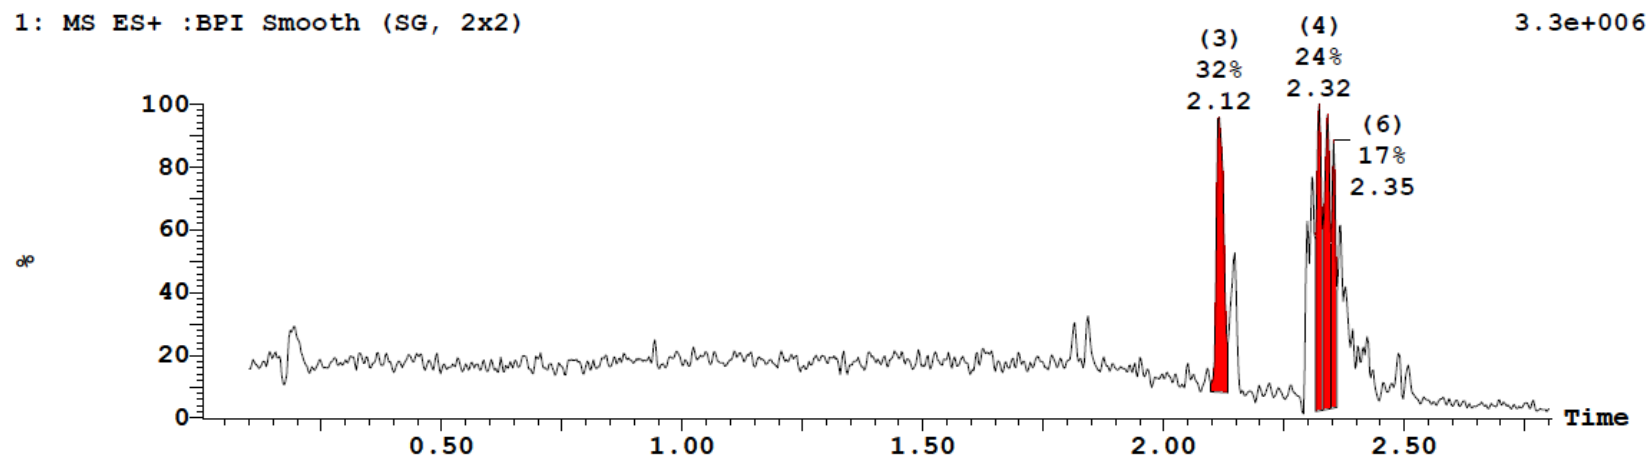

3: UV Detector: TIC

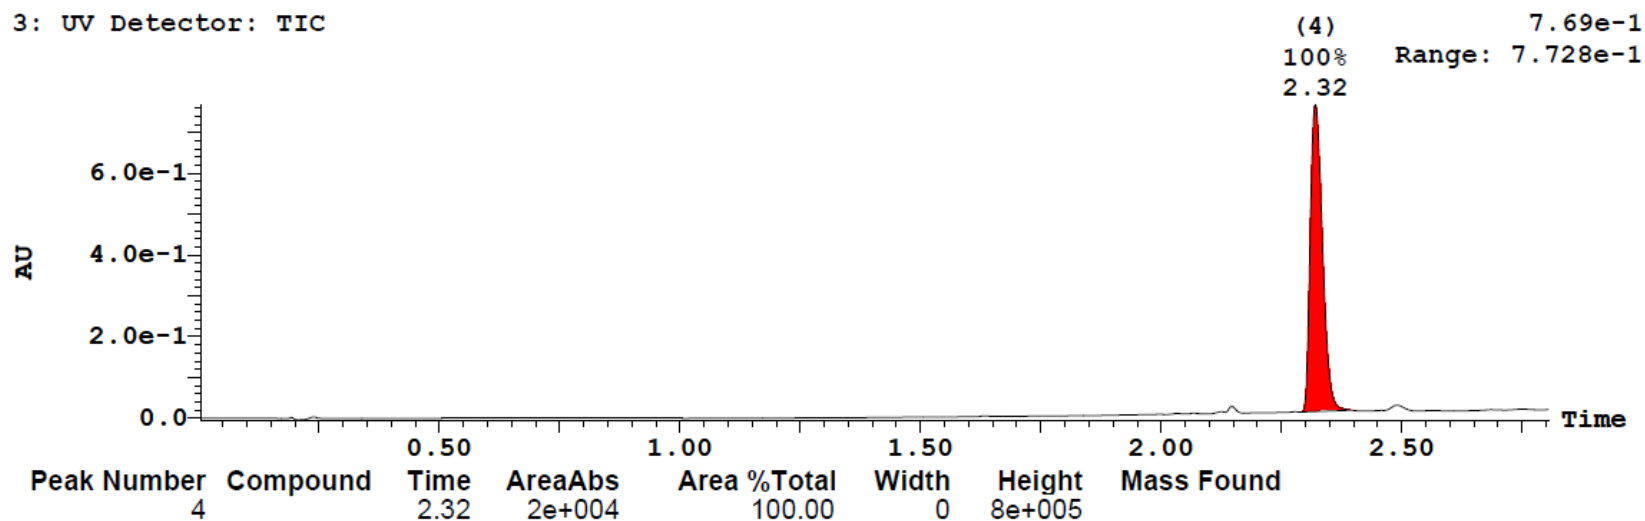



4: (Time: 2.32) Combine (925:933-(909:913+963:967))

1:MS ES+  
2.1e+006

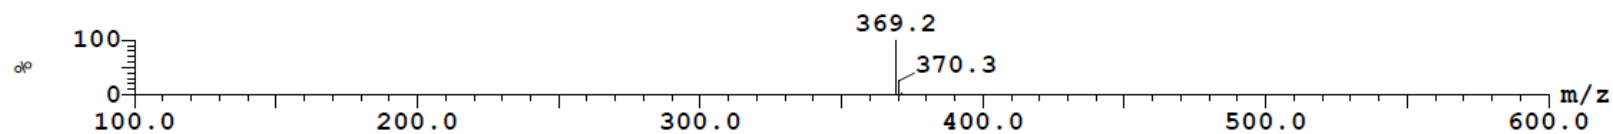

| Peak ID | Compound | Time | Mass Found |
|---------|----------|------|------------|
| 5       |          | 2.34 |            |

49UAMC5394

medchem\_140324\_M29 1156 (10.066) Cm (1149:1174-813:919)

1: TOF MS ES+  
2.21e8

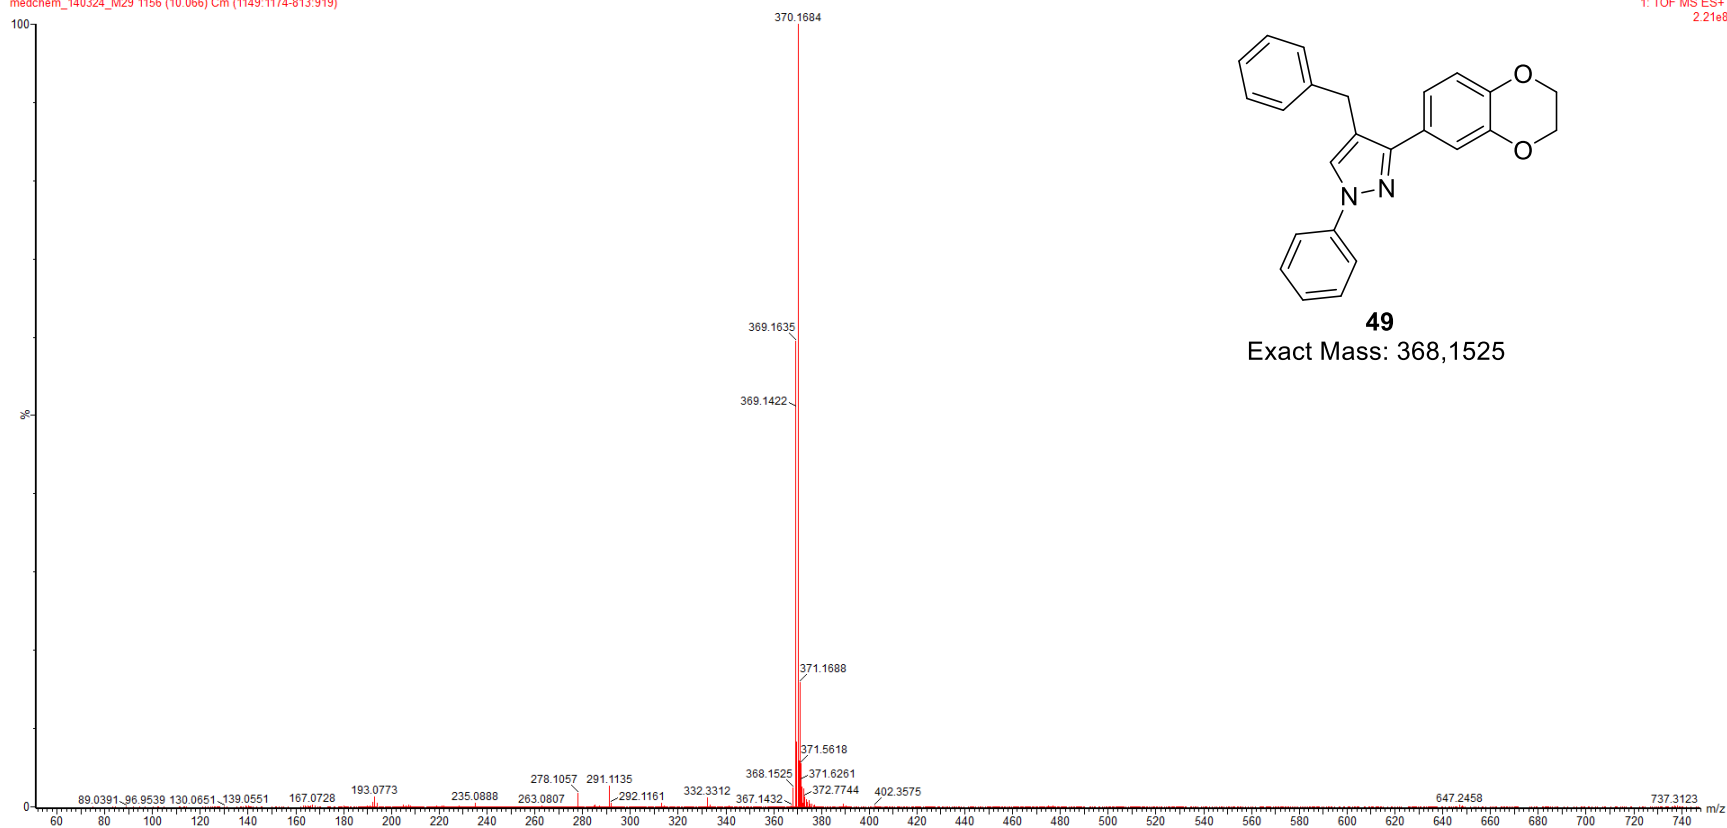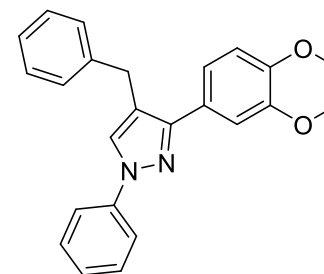

49

Exact Mass: 368,1525

2.14 1-((3-(2,3-dihydrobenzo[b][1,4]dioxin-6-yl)-1-phenyl-1H-pyrazol-4-yl)methyl)-3-(4-fluorophenyl)urea (54)

Sample 1 Vial 1:56 ID UAMC-5434 File UAMC-5434 Date 13-Apr-2023 Time 17:45:39 Description

1: MS ES+ :BPI Smooth (SG, 2x2)

3.2e+006

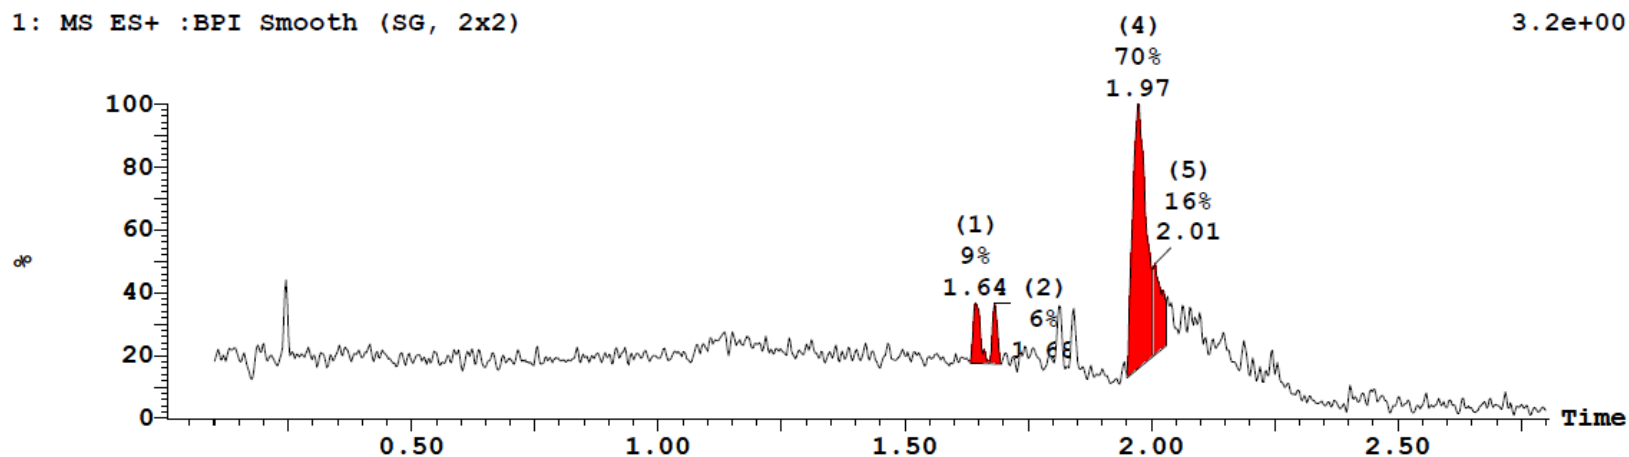

3: UV Detector: TIC

1.139

Range: 1.142

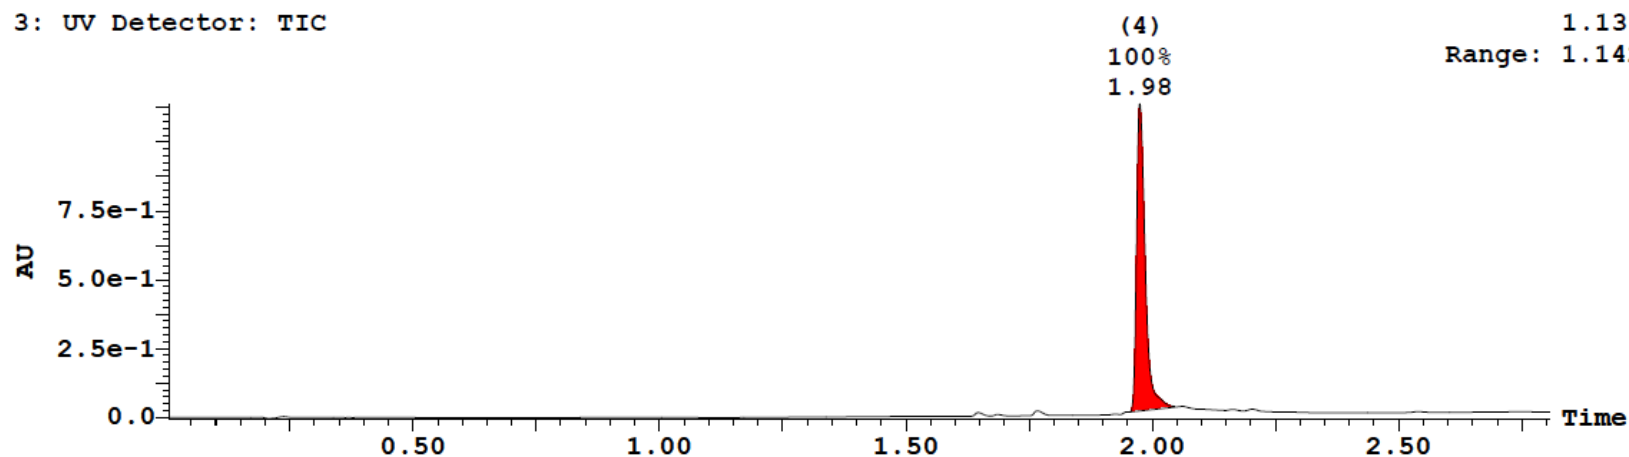

| Peak Number | Compound | Time | AreaAbs | Area %Total | Width | Height | Mass Found |
|-------------|----------|------|---------|-------------|-------|--------|------------|
| 4           |          | 1.98 | 2e+004  | 100.00      | 0     | 1e+006 |            |

Peak ID Compound Time Mass Found

4 1.97

4: (Time: 1.98) Combine (787:795-(774:778+826:830))

1:MS ES+

2.4e+006

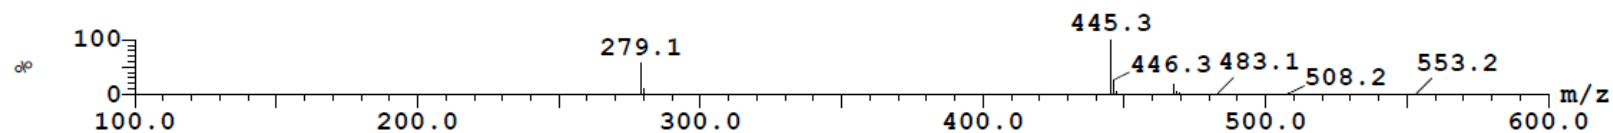

54UAMC5434

medchem\_140324\_M25 912 (7.941) Cm (905:919-790:823)

1: TOF MS ES+

9.56e7

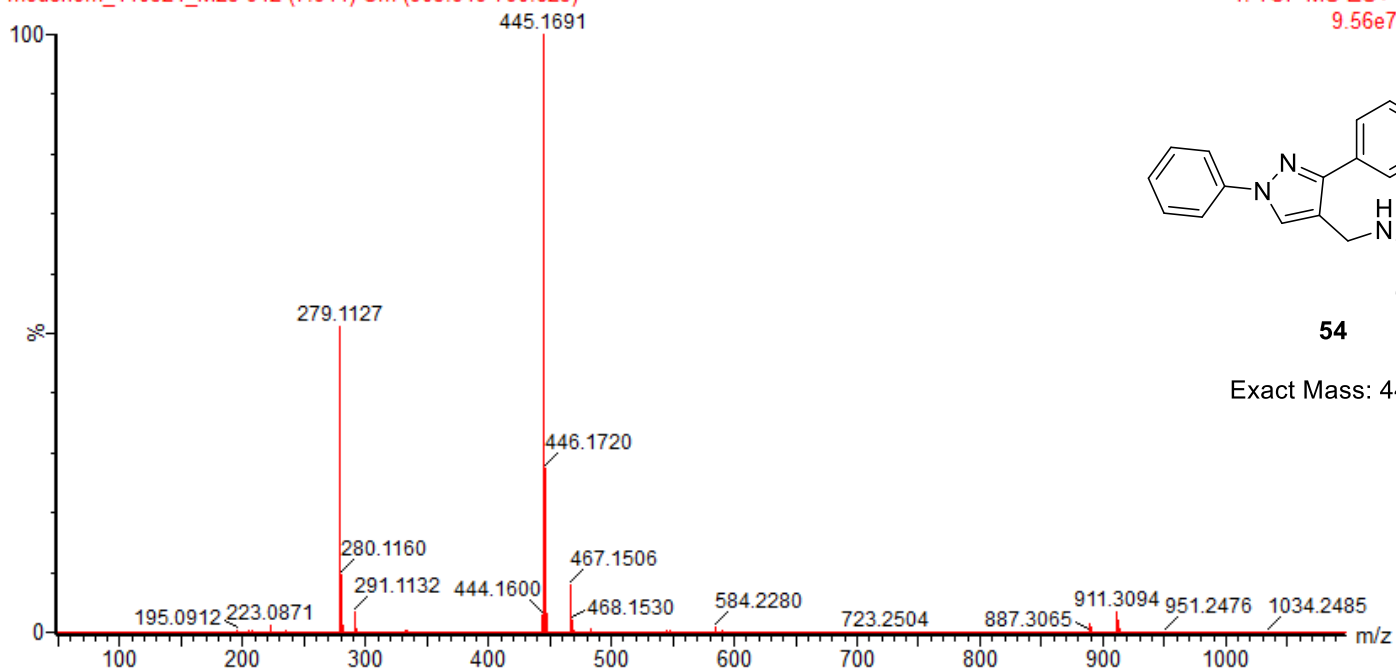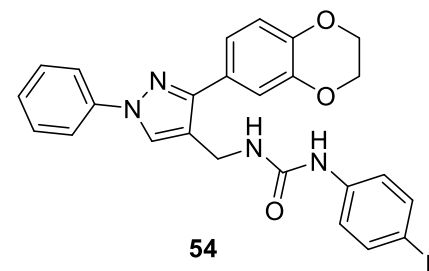

54

Exact Mass: 444,1598

2.15 4-(((4-fluorobenzyl)oxy)methyl)-3-(4-methoxyphenyl)-1-phenyl-1H-pyrazole (68)

Sample 1 Vial 2:46 ID UAMC-5419 File UAMC-5419 Date 12-Apr-2023 Time 13:59:34 Description

1: MS ES+ :BPI Smooth (SG, 2x2)

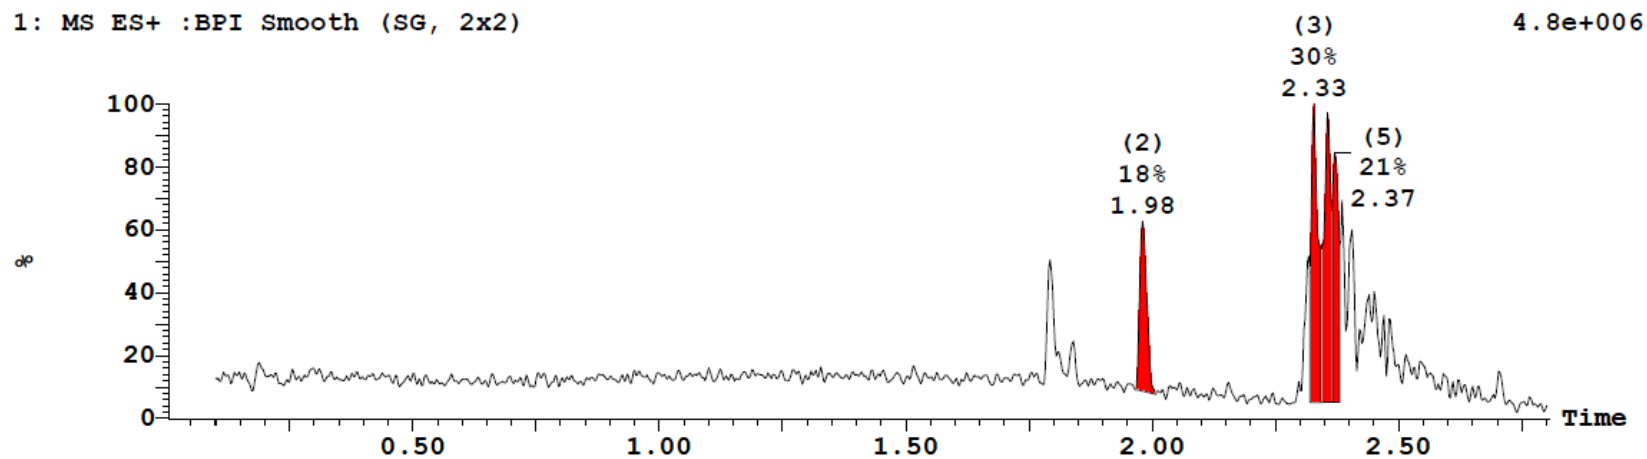

3: UV Detector: TIC

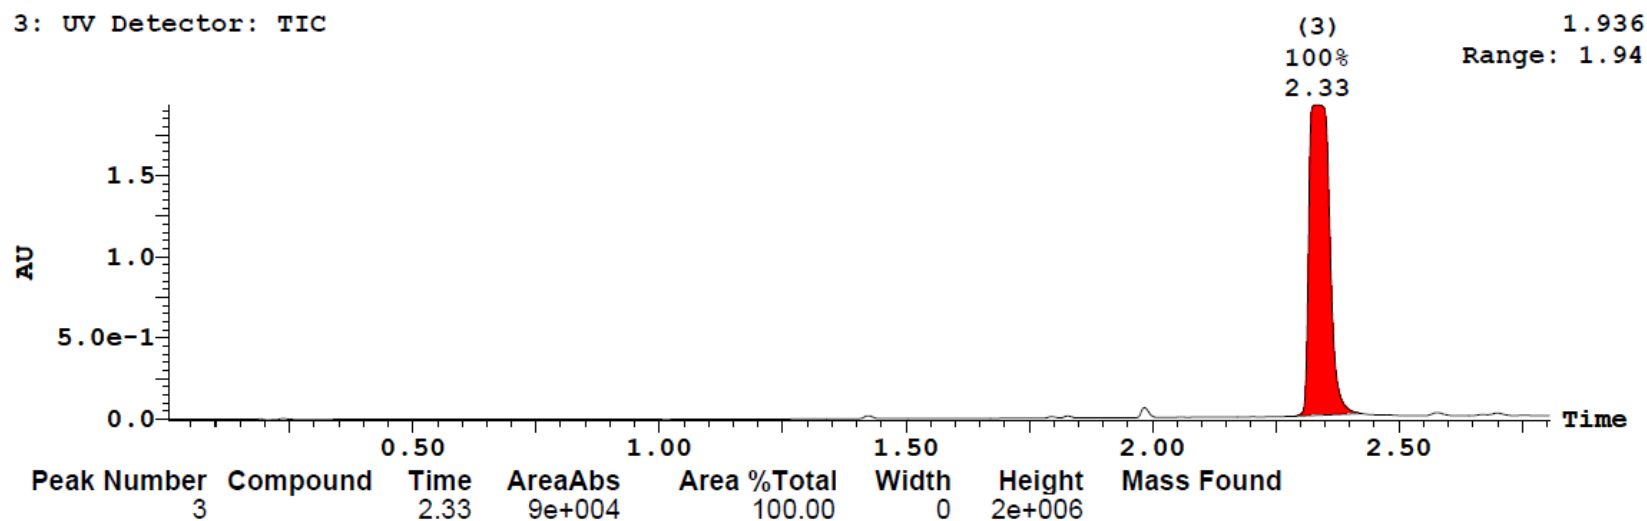

Peak ID Compound Time Mass Found

3 2.33

3: (Time: 2.33) Combine (931:939- (908:912+975:979))

1:MS ES+

2.6e+006

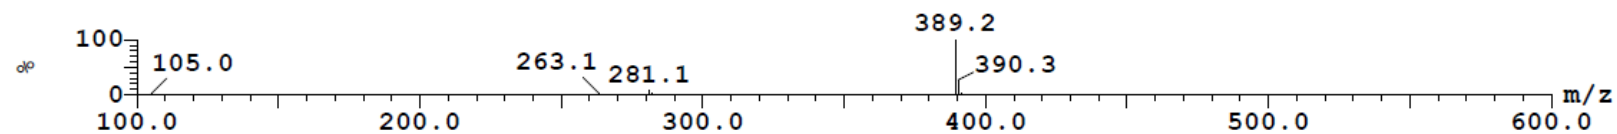

68UAMC5419

medchem\_140324\_M27 1169 (10.177) Cm (1163:1187-798:927)

1: TOF MS ES+  
1.59e8

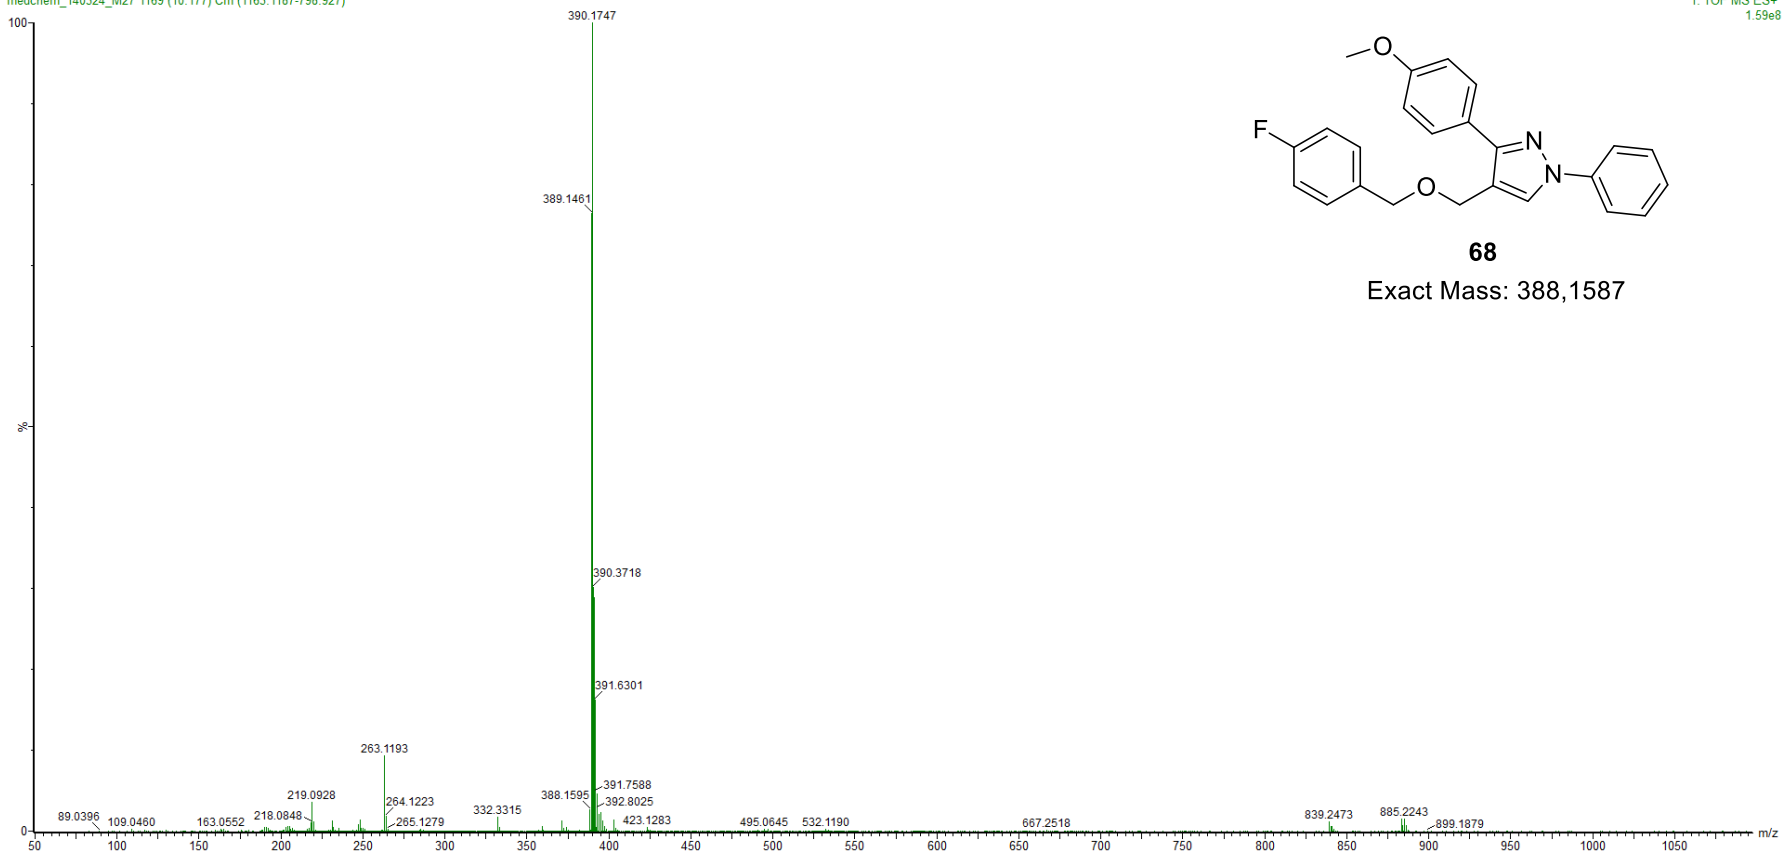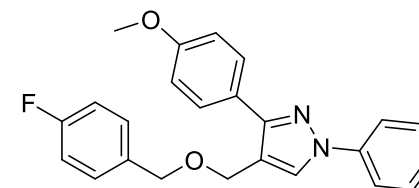

68

Exact Mass: 388,1587

2.16 *N*-((3-(2,3-dihydrobenzo[*b*][1,4]dioxin-6-yl)-1-(pyridin-2-yl)-1*H*-pyrazol-4-yl)methyl)-2-(pyrrolidin-1-yl)ethan-1-amine dihydrochloride (69)

Sample 1 Vial 1:53 ID MB-2021-060E File MB-2021-060E Date 05-Jul-2023 Time 15:25:04 Description

1: MS ES+ :BPI Smooth (SG, 2x2)

5.1e+006

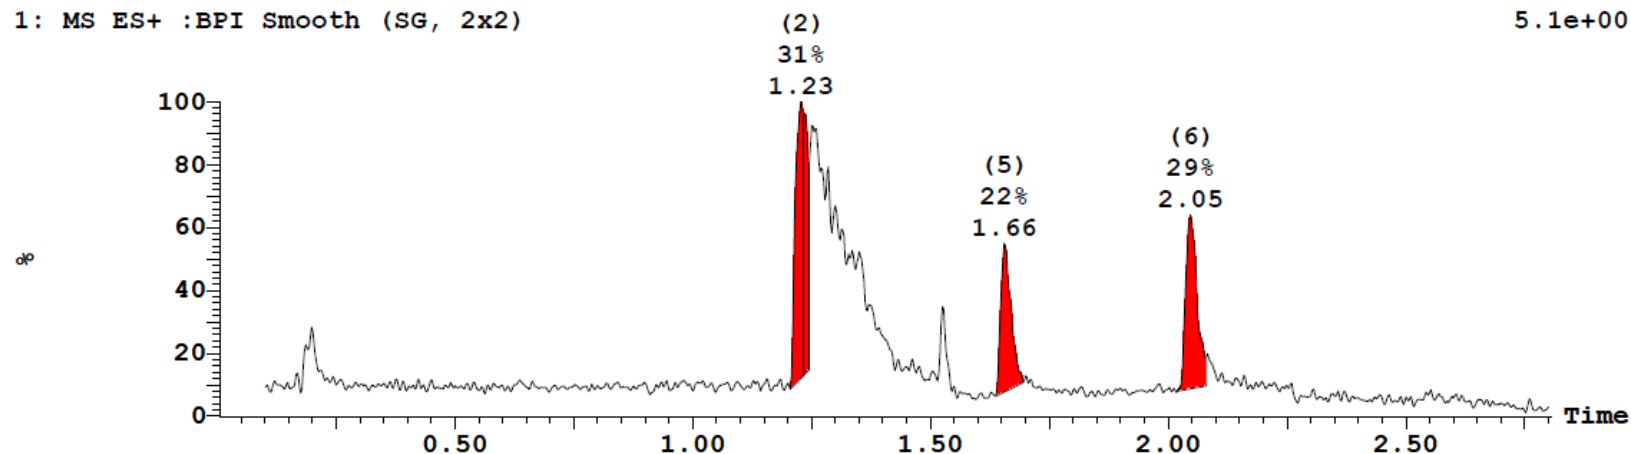

3: UV Detector: TIC

2.058e-1

Range: 2.088e-1

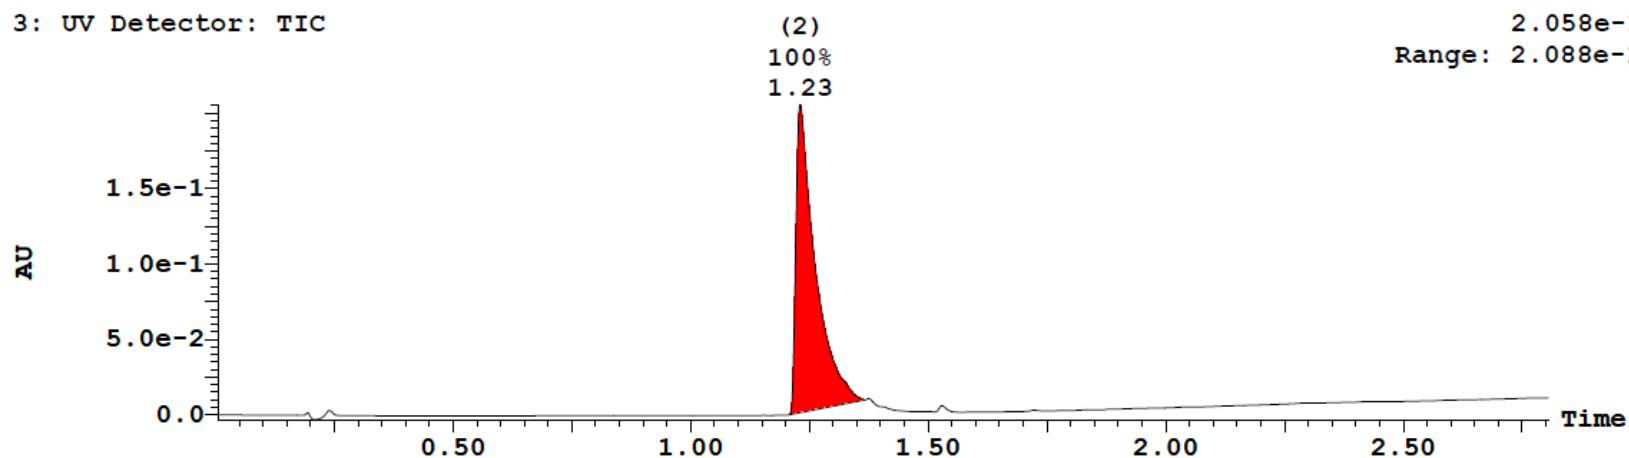

| Peak Number | Compound | Time | AreaAbs | Area %Total | Width | Height | Mass Found |
|-------------|----------|------|---------|-------------|-------|--------|------------|
| 2           |          | 1.23 | 1e+004  | 100.00      | 0     | 2e+005 |            |

Peak ID Compound Time Mass Found  
 2 1.23  
 2: (Time: 1.23) Combine (489:497- (475:479+552:556))

1:MS ES+  
 4.1e+006

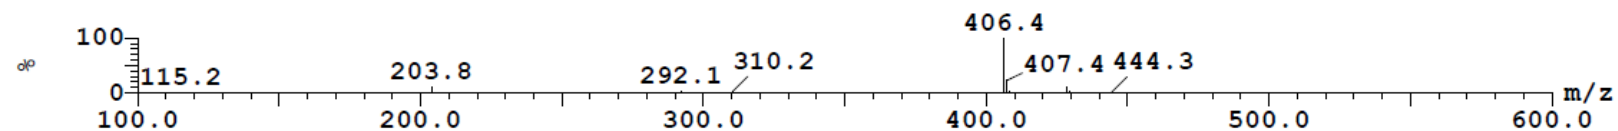

69UAMC5462  
 medchem\_140324\_M31 365 (3.192) Cm (365:378)

1: TOF MS ES+  
 2.53e7

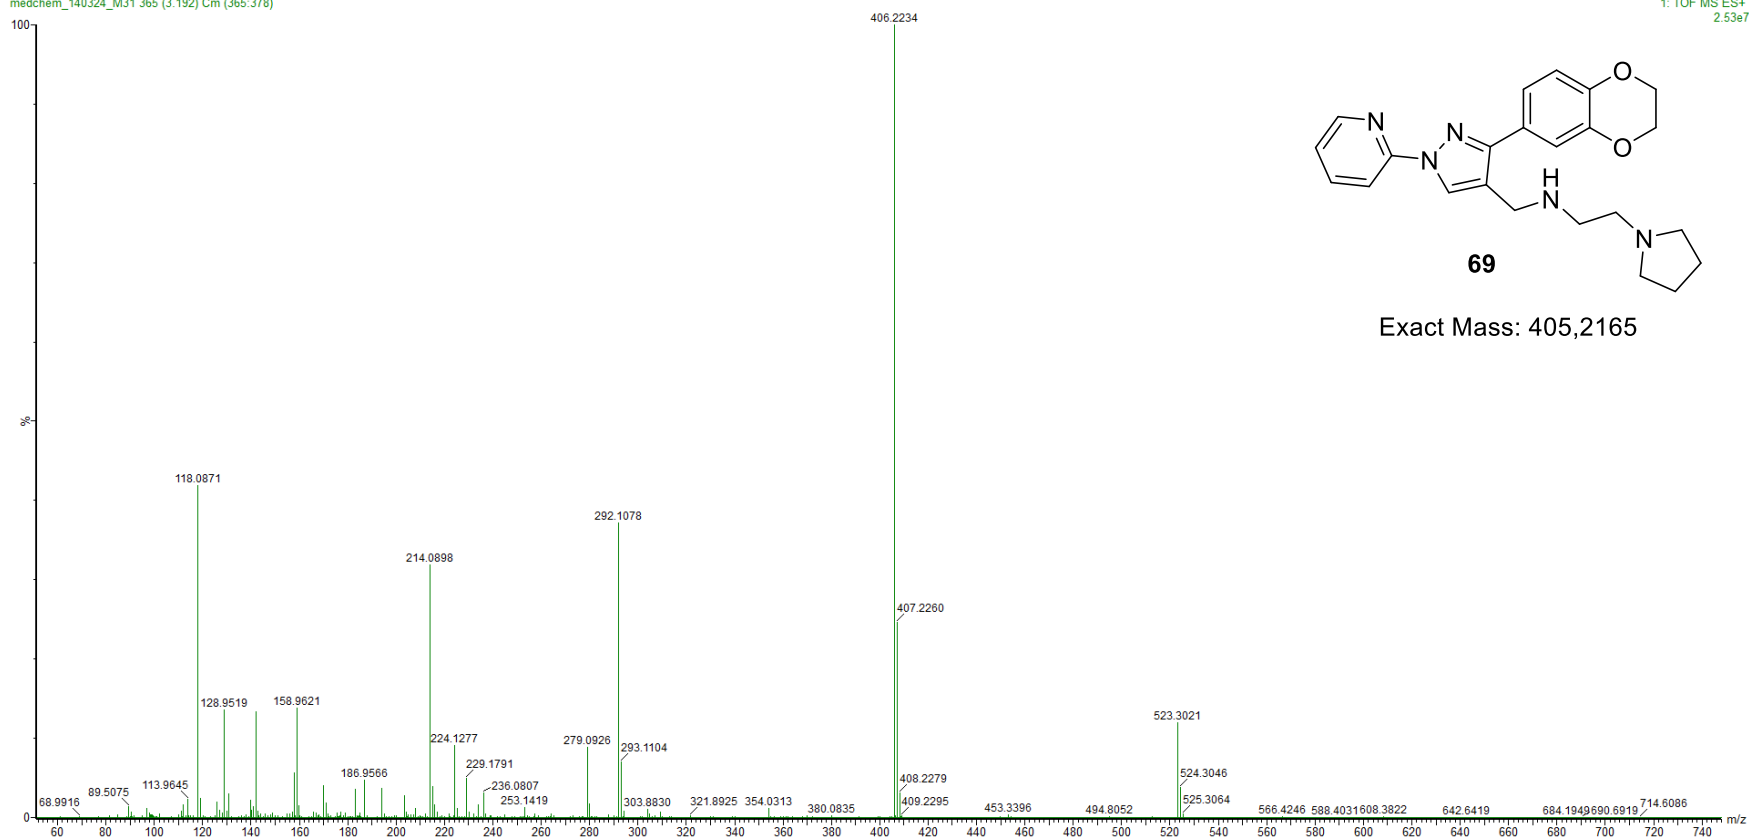

Supplement: s1 [file s1]
